# Supplementary material for: Feedback on the Rate and Depth of Chest Compressions during Cardiopulmonary Resuscitation Using Only Accelerometers
Source: PubMed Central journal article supplement (PMC4773040; doi:10.1371/journal.pone.0150139), 2016-03-01

Mabel Marijuán Angulo, Directora de Ética en la Investigación y la Docencia de la Universidad del País Vasco/Euskal Herriko Unibertsitatea,

### CERTIFICA

Que el artículo titulado: *Feedback on the Rate and Depth of Chest Compressions during Cardiopulmonary Resuscitation Using Only Accelerometers*, contiene datos de voluntarios cuya participación fue solicitada a través de documentos de Consentimiento Informado adecuados y que se conservan en un fichero de Protección de Datos cuyo nombre es **INB - RCP MANIQUI**, y que se encuentra dado de alta en la AVPD, cumpliendo así con los requisitos establecidos por la Ley 14/2007 de Investigación Biomédica y por el RD1720/2007 de desarrollo de la Ley Orgánica 15/1999 de Protección de Datos de Carácter Personal.

Para que conste y a petición de la Dra. Sofía Ruiz de Gauna, lo firmo en Leioa a catorce de septiembre de dos mil quince.

  
Mabel Marijuán Angulo

Directora de Ética en la Investigación y la Docencia de la UPV/EHU

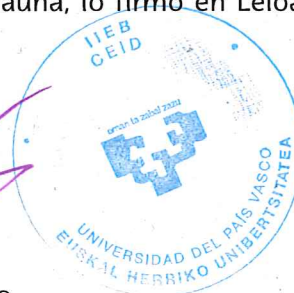

Supplement: pone.0150139.s005.pdf [file pone.0150139.s005.pdf]
