# Supplementary material for: Feedback on the Rate and Depth of Chest Compressions during Cardiopulmonary Resuscitation Using Only Accelerometers
Source: PLoS One. 2016 Mar 1;11(3):e0150139. doi: 10.1371/journal.pone.0150139 (PMC4773040; doi:10.1371/journal.pone.0150139)
Supplement: S1 File — Estimated vs. Gold Standard depth and rate values for the whole dataset. (XLS) [file pone.0150139.s001.xls]

## Sheet: Couple 1
CC Number	Depth GS	Depth Est	Depth error	Rate GS	Rate Est	Rate error	CC Number	Depth GS	Depth Est	Depth error	Rate GS	Rate Est	Rate error	CC Number	Depth GS	Depth Est	Depth error	Rate GS	Rate Est	Rate error	CC Number	Depth GS	Depth Est	Depth error	Rate GS	Rate Est	Rate error
1	48.5253	50.4787	1.95344	98.3607	100	1.63934	1	56.086	56.8577	0.771665	122.449	122.449	0	1	54.7877	58.6102	3.82251	139.535	136.364	-3.17125	1	44.3943	51.6075	7.21319	78.9474	84.507	5.55967
2	48.8091	53.2273	4.41811	98.3607	100	1.63934	2	50.4322	57.0675	6.63526	122.449	122.449	0	2	56.4019	55.4998	-0.902015	139.535	136.364	-3.17125	2	49.5683	46.5462	-3.0221	78.9474	84.507	5.55967
3	48.8303	50.5785	1.74815	103.448	103.448	0	3	56.152	54.6139	-1.53813	120	122.449	2.44898	3	53.4567	57.2853	3.82865	139.535	142.857	3.32226	3	49.5959	53.4419	3.84594	80	76.9231	-3.07692
4	46.2923	50.6473	4.35501	101.695	103.448	1.75336	4	53.3287	59.3731	6.04444	115.385	115.385	0	4	54.2185	55.4894	1.27087	139.535	139.535	5.96856e-13	4	51.0932	52.1614	1.06821	84.507	82.1918	-2.31526
5	52.3587	52.3117	-0.046986	103.448	98.3607	-5.08762	5	54.1546	55.1666	1.01201	120	120	0	5	53.5785	54.8097	1.23124	136.364	136.364	0	5	52.9737	53.803	0.829344	88.2353	86.9565	-1.27877
6	49.4931	52.3348	2.84169	100	101.695	1.69492	6	56.4699	54.8239	-1.64604	120	122.449	2.44898	6	60.037	61.5431	1.50609	142.857	139.535	-3.32226	6	54.5148	51.025	-3.48987	82.1918	78.9474	-3.24441
7	46.545	50.5767	4.03172	100	105.263	5.26316	7	56.4246	60.7134	4.28887	125	117.647	-7.35294	7	52.6081	49.6023	-3.00572	142.857	142.857	1.22213e-12	7	48.5162	50.6514	2.13512	77.9221	98.3607	20.4386
8	48.5577	50.0587	1.50105	103.448	100	-3.44828	8	54.3673	58.9279	4.56062	122.449	127.66	5.21059	8	55.9776	54.4241	-1.55346	142.857	142.857	1.22213e-12	8	49.9058	49.2657	-0.64005	85.7143	77.9221	-7.79221
9	45.792	49.8627	4.07066	100	101.695	1.69492	9	56.8583	59.2036	2.34529	125	122.449	-2.55102	9	54.8776	57.6306	2.75296	142.857	142.857	-1.22213e-12	9	42.4555	46.1942	3.73871	80	75.9494	-4.05063
10	48.3782	48.9166	0.538427	100	101.695	1.69492	10	56.5146	51.9434	-4.57121	125	122.449	-2.55102	10	55.3499	58.4417	3.09175	146.341	142.857	-3.48432	10	48.5319	50.7675	2.2356	92.3077	89.5522	-2.75545
11	47.5584	51.6941	4.13573	101.695	101.695	3.12639e-13	11	53.8569	57.793	3.93612	125	122.449	-2.55102	11	56.5469	58.3687	1.82182	142.857	142.857	0	11	44.8486	48.9966	4.14798	92.3077	90.9091	-1.3986
12	49.4418	52.4448	3.00301	109.091	105.263	-3.82775	12	53.2672	57.8269	4.55968	125	125	0	12	55.9874	56.5328	0.545344	142.857	142.857	0	12	43.8734	44.068	0.194595	89.5522	95.2381	5.68586
13	51.8413	53.0236	1.18225	109.091	107.143	-1.94805	13	55.173	54.3828	-0.790122	125	125	-9.23706e-13	13	54.2684	56.764	2.49558	139.535	142.857	3.32226	13	44.3837	43.4959	-0.887778	80	82.1918	2.19178
14	52.2614	48.9082	-3.35319	105.263	105.263	0	14	56.5485	57.6726	1.12412	125	125	0	14	58.5426	55.9498	-2.59281	142.857	142.857	1.22213e-12	14	48.0273	48.2689	0.241581	81.0811	78.9474	-2.13371
15	51.9399	57.5728	5.63295	105.263	105.263	0	15	56.0717	59.3454	3.27372	120	122.449	2.44898	15	54.9937	61.8365	6.84278	136.364	133.333	-3.0303	15	48.4014	50.7345	2.33307	84.507	78.9474	-5.55967
16	55.2374	54.6672	-0.570242	107.143	107.143	6.82121e-13	16	54.8611	56.6335	1.77245	122.449	122.449	0	16	57.8339	56.1925	-1.64137	139.535	142.857	3.32226	16	46.7189	50.379	3.66008	81.0811	88.2353	7.15421
17	51.4796	54.5334	3.05379	105.263	107.143	1.8797	17	55.5441	56.3223	0.778261	120	120	0	17	54.8036	56.231	1.42739	139.535	139.535	0	17	54.5089	53.2568	-1.25213	90.9091	82.1918	-8.71731
18	52.6336	53.7947	1.16115	105.263	105.263	-6.53699e-13	18	55.2244	59.0437	3.81931	125	122.449	-2.55102	18	58.0114	57.4218	-0.589597	146.341	142.857	-3.48432	18	53.1774	49.6866	-3.49081	77.9221	83.3333	5.41126
19	50.6872	53.9999	3.31271	105.263	105.263	0	19	57.4385	56.7663	-0.672185	120	122.449	2.44898	19	58.0218	60.1209	2.09902	136.364	139.535	3.17125	19	50.4327	45.6371	-4.79566	88.2353	89.5522	1.31694
20	52.5403	54.4451	1.90485	105.263	105.263	0	20	56.7225	58.9205	2.19794	122.449	122.449	0	20	55.9162	58.8967	2.98052	142.857	142.857	1.22213e-12	20	48.8177	54.8067	5.98904	88.2353	89.5522	1.31694
21	52.8468	55.0835	2.23669	109.091	109.091	0	21	56.4304	58.1641	1.73369	122.449	122.449	0	21	57.6783	54.7966	-2.88171	146.341	146.341	0	21	50.582	49.6458	-0.936196	90.9091	88.2353	-2.6738
22	52.5189	55.5584	3.03951	105.263	107.143	1.8797	22	58.0527	58.5497	0.496963	120	122.449	2.44898	22	54.4764	60.9521	6.4757	139.535	139.535	0	22	47.7663	50.2639	2.49763	84.507	92.3077	7.80065
23	49.5738	53.8453	4.27148	113.208	107.143	-6.06469	23	56.5694	58.3978	1.82842	122.449	117.647	-4.80192	23	56.0123	56.4641	0.451754	142.857	139.535	-3.32226	23	51.8163	50.9206	-0.895736	86.9565	80	-6.95652
24	50.7056	50.782	0.0763543	105.263	111.111	5.84795	24	53.8736	58.472	4.59848	120	122.449	2.44898	24	57.9209	57.562	-0.35893	146.341	142.857	-3.48432	24	49.3712	53.3574	3.98619	84.507	85.7143	1.20724
25	47.5042	52.5027	4.99848	105.263	105.263	0	25	56.5055	55.9808	-0.52473	122.449	125	2.55102	25	58.4367	59.3844	0.947686	133.333	139.535	6.20155	25	50.0704	50.2983	0.22793	85.7143	88.2353	2.52101
26	53.1206	51.9903	-1.13029	107.143	101.695	-5.44794	26	58.3797	60.4516	2.07189	120	120	0	26	54.3062	56.9489	2.64266	142.857	139.535	-3.32226	26	48.5079	52.5934	4.08545	83.3333	83.3333	0
27	53.8698	57.0332	3.16346	111.111	111.111	0	27	56.5076	60.649	4.14135	122.449	122.449	8.95284e-13	27	57.8405	61.5308	3.69031	139.535	139.535	0	27	48.5838	47.1933	-1.39052	83.3333	90.9091	7.57576
28	54.4857	55.5285	1.04286	107.143	109.091	1.94805	28	55.49	58.308	2.81799	125	122.449	-2.55102	28	57.6491	58.3731	0.724007	139.535	142.857	3.32226	28	48.7639	49.863	1.09906	82.1918	84.507	2.31526
29	53.5826	56.5539	2.97138	109.091	109.091	-6.96332e-13	29	55.0331	57.4043	2.37121	125	125	0	29	58.413	59.927	1.51401	139.535	139.535	0	29	51.2305	51.9186	0.688136	81.0811	72.2892	-8.79192
30	54.8846	56.6013	1.71668	107.143	109.091	1.94805	30	56.7904	57.8784	1.08794	120	120	0	30	56.6977	60.5274	3.82964	146.341	139.535	-6.80658	30	52.2112	54.3882	2.17702	83.3333	83.3333	8.2423e-13
31	51.5867	55.7256	4.1389	109.091	107.143	-1.94805	31	57.349	61.3583	4.00931	122.449	122.449	0	31	59.4275	59.6528	0.225315	142.857	146.341	3.48432	31	50.2095	52.5688	2.35927	88.2353	85.7143	-2.52101
32	51.7109	50.6193	-1.09161	105.263	107.143	1.8797	32	57.4201	58.9465	1.52649	122.449	122.449	0	32	59.3812	59.7427	0.36153	139.535	139.535	0	32	47.8562	50.415	2.55881	86.9565	89.5522	2.59572
33	49.9887	55.1968	5.20814	105.263	105.263	0	33	57.4658	58.563	1.0972	117.647	120	2.35294	33	59.44	61.754	2.31403	142.857	139.535	-3.32226	33	50.2904	52.2284	1.93797	89.5522	88.2353	-1.31694
34	48.9714	50.3244	1.35301	105.263	107.143	1.8797	34	52.1622	58.6199	6.45766	122.449	122.449	8.95284e-13	34	58.3176	61.1225	2.80491	142.857	146.341	3.48432	34	51.8927	55.2021	3.30937	93.75	90.9091	-2.84091
35	48.6548	52.2197	3.56487	107.143	107.143	0	35	52.7628	55.1414	2.37862	122.449	120	-2.44898	35	55.7275	55.9436	0.216159	142.857	142.857	0	35	50.222	52.6713	2.44933	86.9565	89.5522	2.59572
36	48.4504	50.7421	2.29165	103.448	103.448	0	36	54.5592	54.12	-0.439232	125	125	0	36	56.6807	53.9649	-2.71579	142.857	142.857	0	36	47.117	52.6551	5.53808	89.5522	90.9091	1.35685
37	50.5817	51.8153	1.2336	105.263	105.263	0	37	54.2243	58.86	4.63571	127.66	127.66	0	37	55.9881	60.3766	4.38853	136.364	139.535	3.17125	37	47.3104	49.2557	1.94534	84.507	83.3333	-1.17371
38	54.6748	55.1876	0.512815	105.263	101.695	-3.56824	38	52.5426	50.6346	-1.90798	130.435	125	-5.43478	38	56.8006	60.5658	3.76522	139.535	136.364	-3.17125	38	47.974	49.8705	1.89656	86.9565	86.9565	-8.95284e-13
39	52.724	52.64	-0.0839819	103.448	107.143	3.69458	39	56.7776	56.5591	-0.218449	130.435	125	-5.43478	39	56.4046	58.0337	1.62901	139.535	139.535	0	39	48.9949	50.6703	1.6754	85.7143	86.9565	1.24224
40	53.65	54.9652	1.31513	103.448	105.263	1.81488	40	55.6074	61.9163	6.30889	122.449	122.449	1.77636e-12	40	57.7222	56.7673	-0.954873	139.535	142.857	3.32226	40	46.4458	49.8201	3.37435	84.507	82.1918	-2.31526
41	53.983	55.3452	1.36216	101.695	100	-1.69492	41	56.8804	57.1729	0.292502	120	122.449	2.44898	41	56.1156	58.7807	2.66514	142.857	142.857	-2.41585e-12	41	51.5362	50.8114	-0.724728	85.7143	85.7143	8.66862e-13
42	52.1673	54.2807	2.11339	103.448	101.695	-1.75336	42	55.2518	58.0335	2.78173	122.449	120	-2.44898	42	57.0638	61.3107	4.24689	142.857	139.535	-3.32226	42	48.0366	49.5225	1.48596	81.0811	89.5522	8.47116
43	48.3241	52.9396	4.61548	105.263	105.263	0	43	53.303	56.3732	3.07021	125	125	0	43	54.7005	54.5861	-0.11444	142.857	146.341	3.48432	43	46.384	50.4564	4.07233	82.1918	76.9231	-5.2687
44	45.1336	48.913	3.77944	109.091	107.143	-1.94805	44	53.9625	55.3757	1.41322	122.449	125	2.55102	44	56.9685	55.7304	-1.23815	142.857	142.857	0	44	50.2455	50.9659	0.720462	86.9565	82.1918	-4.76474
45	53.4935	49.1955	-4.298	107.143	105.263	-1.8797	45	53.6912	55.6	1.90886	120	120	0	45	57.9938	58.2026	0.20881	142.857	139.535	-3.32226	45	49.1765	50.538	1.36159	83.3333	88.2353	4.90196
46	50.6966	55.4848	4.7882	107.143	105.263	-1.8797	46	54.0616	56.502	2.44036	122.449	122.449	0	46	51.9603	57.2253	5.26506	136.364	142.857	6.49351	46	51.9685	54.0057	2.03722	90.9091	86.9565	-3.95257
47	54.8126	54.1544	-0.658209	107.143	109.091	1.94805	47	53.2807	54.6195	1.33877	122.449	120	-2.44898	47	54.5158	56.6647	2.14898	139.535	136.364	-3.17125	47	47.4326	50.5567	3.12408	85.7143	86.9565	1.24224
48	53.4782	54.5986	1.12036	109.091	109.091	0	48	52.1982	55.0955	2.89731	117.647	122.449	4.80192	48	54.1991	54.7451	0.546054	139.535	139.535	0	48	47.5534	51.7209	4.1675	85.7143	86.9565	1.24224
49	54.3467	55.4492	1.10244	107.143	105.263	-1.8797	49	55.8288	56.561	0.732198	122.449	120	-2.44898	49	54.1419	53.5603	-0.581527	142.857	139.535	-3.32226	49	47.4658	48.9199	1.45414	85.7143	86.9565	1.24224
50	55.76	58.2205	2.46053	111.111	111.111	0	50	56.9449	59.5118	2.56688	122.449	122.449	0	50	56.4841	58.216	1.73186	139.535	142.857	3.32226	50	48.1861	50.9369	2.75081	84.507	82.1918	-2.31526
51	56.863	57.565	0.701989	109.091	109.091	-1.40687e-12	51	55.4879	59.0217	3.53385	122.449	125	2.55102	51	56.9276	58.9691	2.04151	146.341	142.857	-3.48432	51	47.7966	50.9986	3.20197	82.1918	83.3333	1.14155
52	53.8066	55.8125	2.00598	107.143	111.111	3.96825	52	56.3097	57.1618	0.852082	122.449	120	-2.44898	52	54.4634	54.5421	0.0787093	142.857	146.341	3.48432	52	52.6743	51.8939	-0.780443	84.507	82.1918	-2.31526
53	50.8283	52.8361	2.0078	103.448	103.448	0	53	56.9256	58.8666	1.94094	122.449	125	2.55102	53	57.1591	54.9136	-2.24555	142.857	142.857	0	53	47.9714	52.4943	4.52283	83.3333	90.9091	7.57576
54	52.3026	53.3395	1.03696	107.143	105.263	-1.8797	54	55.2223	60.2523	5.02998	127.66	122.449	-5.21059	54	57.6768	61.739	4.06221	142.857	139.535	-3.32226	54	49.4202	47.5032	-1.91706	77.9221	75	-2.92208
55	51.5982	53.9906	2.39238	111.111	111.111	0	55	57.1185	57.2865	0.168067	127.66	130.435	2.77521	55	59.3786	59.3659	-0.0127182	136.364	139.535	3.17125	55	49.1423	53.9641	4.82182	82.1918	81.0811	-1.1107
56	55.1707	55.8803	0.70962	107.143	105.263	-1.8797	56	57.1489	58.691	1.54211	122.449	122.449	0	56	55.1894	59.6777	4.48833	136.364	136.364	0	56	50.6	53.0421	2.44215	88.2353	86.9565	-1.27877
57	53.6415	55.9677	2.32618	111.111	111.111	0	57	56.2753	59.7888	3.51347	117.647	117.647	0	57	56.2516	54.7829	-1.46864	146.341	146.341	-2.52953e-12	57	50.8022	50.3935	-0.40865	83.3333	83.3333	0
58	52.286	55.7195	3.4335	109.091	109.091	-1.40687e-12	58	55.5269	58.0513	2.52436	117.647	117.647	0	58	55.7066	53.5609	-2.14576	139.535	139.535	0	58	44.6589	49.6328	4.97394	83.3333	84.507	1.17371
59	54.6992	55.6662	0.966948	107.143	109.091	1.94805	59	53.8161	58.7007	4.88469	122.449	120	-2.44898	59	55.3723	59.8949	4.52261	146.341	142.857	-3.48432	59	48.3389	48.5059	0.166987	83.3333	83.3333	0
60	54.0637	57.0517	2.98799	105.263	105.263	0	60	54.6688	55.9103	1.24156	117.647	122.449	4.80192	60	55.7364	55.363	-0.373323	136.364	139.535	3.17125	60	48.1022	51.4146	3.31246	83.3333	90.9091	7.57576
61	53.7399	53.7965	0.0565412	105.263	105.263	0	61	54.8644	57.9425	3.07808	125	122.449	-2.55102	61	51.2865	55.4562	4.16979	139.535	139.535	0	61	49.3334	48.9706	-0.362835	86.9565	80	-6.95652
62	50.8127	55.4373	4.62466	103.448	107.143	3.69458	62	54.788	57.0436	2.25555	120	122.449	2.44898	62	57.2821	56.5295	-0.752573	153.846	146.341	-7.50469	62	48.0409	51.3655	3.32468	83.3333	83.3333	0
63	52.319	52.3113	-0.00770314	105.263	101.695	-3.56824	63	55.9914	57.4736	1.48212	122.449	120	-2.44898	63	56.2744	53.4233	-2.85104	142.857	142.857	-2.41585e-12	63	50.6057	48.2986	-2.30715	75	92.3077	17.3077
64	53.7661	55.62	1.85384	105.263	105.263	0	64	53.7541	58.565	4.81087	125	125	0	64	53.6508	51.8339	-1.81691	142.857	142.857	-2.41585e-12	64	45.194	50.9911	5.79712	84.507	70.5882	-13.9188
65	52.1464	54.2372	2.09082	103.448	103.448	-1.26477e-12	65	57.9925	58.2208	0.22837	125	122.449	-2.55102	65	57.1047	59.1297	2.025	139.535	139.535	0	65	48.9702	44.5947	-4.37541	83.3333	83.3333	0
66	52.9433	53.7124	0.769125	105.263	103.448	-1.81488	66	53.9779	50.7844	-3.19347	125	122.449	-2.55102	66	55.5351	59.1552	3.62005	139.535	139.535	2.33058e-12	66	46.7097	49.2134	2.50367	81.0811	81.0811	0
67	54.9108	55.0995	0.188713	107.143	109.091	1.94805	67	50.2747	54.558	4.28326	125	122.449	-2.55102	67	58.0332	55.9611	-2.07202	139.535	136.364	-3.17125	67	49.7907	51.2241	1.43337	83.3333	82.1918	-1.14155
68	55.0484	57.1553	2.1069	103.448	105.263	1.81488	68	50.655	55.5162	4.86116	122.449	125	2.55102	68	55.5713	60.634	5.06274	136.364	139.535	3.17125	68	51.9422	53.4578	1.51556	85.7143	84.507	-1.20724
69	54.1371	55.483	1.34592	107.143	109.091	1.94805	69	50.5522	52.6837	2.13145	122.449	122.449	0	69	58.3707	57.8717	-0.498992	142.857	142.857	0	69	50.9305	53.0981	2.16768	82.1918	84.507	2.31526
70	53.2017	54.1756	0.973843	103.448	103.448	0	70	56.0503	55.6711	-0.379248	122.449	122.449	0	70	58.5351	59.4899	0.954883	142.857	139.535	-3.32226	70	50.8491	54.5849	3.73576	85.7143	84.507	-1.20724
71	51.8758	55.4994	3.62361	107.143	103.448	-3.69458	71	56.5086	59.2727	2.76401	125	122.449	-2.55102	71	56.294	60.3029	4.00892	136.364	139.535	3.17125	71	49.4675	50.528	1.06046	82.1918	83.3333	1.14155
72	51.2925	53.5855	2.29298	109.091	109.091	0	72	56.3724	58.8461	2.47366	125	125	0	72	55.2186	57.2303	2.01172	136.364	136.364	0	72	50.0584	52.1155	2.05707	86.9565	86.9565	0
73	53.9984	52.7284	-1.26996	105.263	109.091	3.82775	73	55.7592	58.6719	2.91271	125	127.66	2.65957	73	58.3632	56.8928	-1.4704	142.857	142.857	0	73	49.6726	51.2578	1.58511	83.3333	83.3333	0
74	58.0364	59.0963	1.05997	113.208	107.143	-6.06469	74	54.6787	59.4743	4.79566	125	122.449	-2.55102	74	57.0648	57.4874	0.422539	139.535	139.535	0	74	52.182	53.1695	0.987497	85.7143	84.507	-1.20724
75	49.6034	49.01	-0.593454	107.143	107.143	0	75	53.2202	55.4623	2.24214	122.449	127.66	5.21059	75	55.3902	57.8206	2.4304	142.857	139.535	-3.32226	75	47.9586	47.6248	-0.333787	85.7143	86.9565	1.24224
76	50.7103	55.0743	4.36394	107.143	107.143	0	76	55.5699	56.3222	0.752331	125	122.449	-2.55102	76	53.5653	57.9609	4.39567	142.857	142.857	-2.41585e-12	76	42.5202	51.7799	9.25971	85.7143	86.9565	1.24224
77	51.9088	54.54	2.63117	107.143	105.263	-1.8797	77	57.1678	58.7261	1.55827	122.449	122.449	0	77	54.3484	56.8386	2.49021	133.333	136.364	3.0303	77	47.3263	46.8931	-0.433168	83.3333	83.3333	0
78	54.9769	55.1729	0.195999	111.111	111.111	0	78	56.4506	59.3112	2.86061	120	120	0	78	54.1897	53.3236	-0.866022	139.535	139.535	0	78	51.2754	52.5945	1.3191	84.507	83.3333	-1.17371
79	57.1514	58.9862	1.83487	109.091	109.091	0	79	55.3704	57.9075	2.53714	125	125	0	79	54.2769	57.484	3.20701	136.364	136.364	-2.18847e-12	79	48.7621	49.4523	0.690254	77.9221	80	2.07792
80	57.4444	58.7941	1.34976	107.143	107.143	0	80	55.6029	58.0062	2.40334	127.66	125	-2.65957	80	53.4756	57.6582	4.18265	142.857	142.857	2.41585e-12	80	50.654	55.094	4.43994	84.507	82.1918	-2.31526
81	56.687	59.9282	3.24114	105.263	105.263	2.62901e-12	81	53.4963	56.1302	2.63392	125	125	1.84741e-12	81	54.8112	54.6872	-0.123931	142.857	142.857	0	81	47.8395	50.1264	2.28696	80	83.3333	3.33333
82	50.5176	55.1388	4.62116	101.695	107.143	5.44794	82	52.7156	55.7764	3.06088	122.449	125	2.55102	82	53.4038	55.8482	2.44437	142.857	139.535	-3.32226	82	48.7696	49.6884	0.918804	82.1918	81.0811	-1.1107
83	48.1423	51.2374	3.09512	103.448	101.695	-1.75336	83	55.1573	55.9463	0.789039	122.449	122.449	0	83	53.7886	51.9444	-1.84418	136.364	139.535	3.17125	83	49.6585	51.8393	2.18083	83.3333	83.3333	0
84	48.5847	52.0822	3.49752	107.143	105.263	-1.8797	84	50.1325	55.6577	5.52522	120	122.449	2.44898	84	51.058	57.9675	6.9095	142.857	139.535	-3.32226	84	50.7355	50.0851	-0.650324	81.0811	81.0811	-1.54898e-12
85	50.5763	52.3128	1.73649	109.091	109.091	2.81375e-12	85	50.5724	52.9807	2.40826	125	122.449	-2.55102	85	56.3941	55.6789	-0.715225	136.364	139.535	3.17125	85	50.1754	53.1969	3.02157	88.2353	88.2353	0
86	49.5432	51.5685	2.02537	115.385	113.208	-2.17707	86	51.096	53.5276	2.43155	122.449	127.66	5.21059	86	56.6723	56.4609	-0.211389	133.333	133.333	0	86	51.775	50.4349	-1.34003	86.9565	88.2353	1.27877
87	46.9791	50.3915	3.41242	107.143	107.143	0	87	48.4792	53.084	4.60483	125	122.449	-2.55102	87	59.0288	57.9598	-1.06893	133.333	136.364	3.0303	87	51.6552	52.7922	1.13702	82.1918	81.0811	-1.1107
88	50.4713	48.7259	-1.7454	101.695	105.263	3.56824	88	51.3662	52.5373	1.17115	122.449	122.449	0	88	58.0624	60.8532	2.79082	139.535	136.364	-3.17125	88	48.8906	52.7188	3.82821	83.3333	83.3333	0
89	51.3248	52.7015	1.37668	103.448	103.448	2.52953e-12	89	51.5762	54.2927	2.71648	125	122.449	-2.55102	89	57.4176	58.8426	1.42502	142.857	142.857	2.41585e-12	89	48.971	52.2837	3.31267	88.2353	86.9565	-1.27877
90	52.8759	55.9489	3.07303	107.143	105.263	-1.8797	90	54.9939	55.7848	0.790967	117.647	117.647	0	90	59.4813	61.2695	1.78826	146.341	142.857	-3.48432	90	48.4177	50.2003	1.78257	86.9565	90.9091	3.95257
91	51.6257	54.3049	2.67921	109.091	109.091	2.81375e-12	91	53.1057	56.0568	2.95111	125	122.449	-2.55102	91	55.2342	57.261	2.02681	142.857	142.857	0	91	53.2619	52.9584	-0.303518	86.9565	83.3333	-3.62319
92	57.3364	57.4684	0.132049	111.111	109.091	-2.0202	92	53.2617	56.2839	3.02214	120	125	5	92	55.8852	52.199	-3.68625	142.857	142.857	0	92	49.5106	53.4028	3.89219	85.7143	85.7143	1.73372e-12
93	54.1552	59.7004	5.54517	105.263	107.143	1.8797	93	55.3348	57.958	2.62318	130.435	125	-5.43478	93	56.3876	60.5185	4.13084	136.364	136.364	0	93	51.1918	50.888	-0.303814	85.7143	86.9565	1.24224
94	54.0542	56.1823	2.12809	103.448	103.448	0	94	54.4851	50.8119	-3.67318	122.449	122.449	0	94	54.0064	58.8751	4.86866	139.535	142.857	3.32226	94	47.6069	50.5016	2.89471	82.1918	84.507	2.31526
95	56.0996	59.3303	3.23074	111.111	107.143	-3.96825	95	53.8455	57.5562	3.71076	122.449	122.449	0	95	55.3812	54.2648	-1.1164	146.341	142.857	-3.48432	95	50.9437	51.6161	0.672472	86.9565	84.507	-2.44948
96	54.8946	56.1933	1.29872	105.263	107.143	1.8797	96	53.9422	59.456	5.51378	122.449	122.449	3.55271e-12	96	56.011	57.4064	1.39538	139.535	139.535	0	96	48.392	52.6061	4.21413	88.2353	86.9565	-1.27877
97	53.9563	57.5442	3.58785	105.263	107.143	1.8797	97	55.0208	56.4327	1.41192	122.449	122.449	-3.55271e-12	97	55.254	58.9383	3.68427	133.333	136.364	3.0303	97	48.2248	48.2464	0.0215791	83.3333	82.1918	-1.14155
98	54.5591	55.1259	0.566777	109.091	109.091	-2.81375e-12	98	55.813	57.8474	2.0344	120	120	0	98	51.5852	56.8053	5.2201	142.857	139.535	-3.32226	98	46.9556	48.7957	1.84012	80	84.507	4.50704
99	47.8933	53.3446	5.45125	103.448	105.263	1.81488	99	55.9105	59.3421	3.43155	120	120	0	99	53.7301	52.5944	-1.13574	139.535	142.857	3.32226	99	49.2982	51.5956	2.2974	84.507	82.1918	-2.31526
100	51.1369	52.257	1.1201	107.143	105.263	-1.8797	100	58.8255	59.9833	1.15786	120	120	0	100	54.5649	56.9965	2.43154	139.535	139.535	-4.63274e-12	100	54.3001	55.1556	0.855491	88.2353	85.7143	-2.52101
101	53.5366	55.2975	1.76094	107.143	105.263	-1.8797	101	56.5996	62.3288	5.72925	120	120	0	101	55.4388	55.728	0.289141	139.535	139.535	4.63274e-12	101	55.0947	55.5584	0.463727	83.3333	85.7143	2.38095
102	53.7614	53.5401	-0.221322	105.263	107.143	1.8797	102	55.3386	58.7484	3.40986	125	125	3.70903e-12	102	57.7585	58.0914	0.332863	142.857	139.535	-3.32226	102	52.9776	56.7125	3.73485	86.9565	88.2353	1.27877
103	52.5066	57.728	5.22135	111.111	107.143	-3.96825	103	54.471	57.7264	3.25538	120	122.449	2.44898	103	55.0056	58.2996	3.29402	142.857	142.857	0	103	49.6599	47.0551	-2.60475	84.507	85.7143	1.20724
104	57.2585	56.4097	-0.848806	113.208	115.385	2.17707	104	53.8121	57.9777	4.16566	120	117.647	-2.35294	104	56.0284	55.1741	-0.854276	142.857	142.857	4.86011e-12	104	46.4644	53.406	6.94163	84.507	85.7143	1.20724
105	52.7921	51.5873	-1.20471	109.091	107.143	-1.94805	105	56.1942	58.7991	2.6049	117.647	117.647	-3.28271e-12	105	53.8707	54.0347	0.163997	139.535	139.535	-4.63274e-12	105	48.0123	48.7206	0.708307	86.9565	86.9565	0
106	52.6788	55.8982	3.2194	109.091	107.143	-1.94805	106	55.3387	57.6317	2.29301	120	120	0	106	51.6527	55.9776	4.32496	142.857	146.341	3.48432	106	50.2857	53.96	3.67427	88.2353	86.9565	-1.27877
107	50.2942	56.0006	5.70641	107.143	109.091	1.94805	107	56.2592	58.3298	2.07056	117.647	120	2.35294	107	53.0344	55.5243	2.48998	146.341	142.857	-3.48432	107	52.0975	52.5108	0.413323	85.7143	86.9565	1.24224
108	45.1246	49.3486	4.22407	107.143	111.111	3.96825	108	53.8321	58.3115	4.47947	122.449	120	-2.44898	108	56.2325	53.9303	-2.30221	142.857	146.341	3.48432	108	50.2999	53.2593	2.95947	83.3333	83.3333	1.64846e-12
109	52.6155	51.8031	-0.812475	109.091	105.263	-3.82775	109	52.4835	54.7668	2.28333	120	122.449	2.44898	109	55.8876	54.8477	-1.03995	136.364	136.364	0	109	54.7935	52.8463	-1.94726	83.3333	81.0811	-2.25225
110	51.9194	56.4077	4.48839	109.091	107.143	-1.94805	110	54.381	57.8278	3.44684	125	125	0	110	54.4766	58.8125	4.33595	142.857	139.535	-3.32226	110	50.2373	53.8555	3.61814	83.3333	89.5522	6.21891
111	49.7828	50.9918	1.20898	111.111	113.208	2.09644	111	51.8603	56.3243	4.46399	122.449	120	-2.44898	111	54.1855	56.937	2.75155	139.535	142.857	3.32226	111	50.6869	48.857	-1.82991	82.1918	80	-2.19178
112	51.5604	54.0841	2.52372	111.111	109.091	-2.0202	112	49.1413	52.0167	2.87535	122.449	127.66	5.21059	112	54.7123	55.0037	0.291418	146.341	142.857	-3.48432	112	47.3123	52.7631	5.45072	85.7143	84.507	-1.20724
113	52.8762	54.4229	1.54665	103.448	105.263	1.81488	113	52.0956	54.3491	2.25342	125	120	-5	113	55.2132	55.3435	0.130311	136.364	139.535	3.17125	113	45.5002	48.6008	3.10064	82.1918	84.507	2.31526
114	48.4691	52.3885	3.91947	107.143	113.208	6.06469	114	52.5341	54.4665	1.93246	120	122.449	2.44898	114	58.3669	59.7901	1.42316	139.535	139.535	0	114	45.7999	50.219	4.41917	88.2353	85.7143	-2.52101
115	51.6939	54.6113	2.91743	113.208	105.263	-7.94439	115	53.2319	58.5097	5.27776	117.647	115.385	-2.26244	115	53.1443	58.8717	5.72745	139.535	139.535	0	115	45.8316	48.5407	2.70917	85.7143	88.2353	2.52101
116	51.1616	52.3021	1.14054	103.448	107.143	3.69458	116	53.6687	56.4106	2.7419	117.647	120	2.35294	116	55.651	57.543	1.89204	136.364	136.364	0	116	48.3444	49.5558	1.21136	84.507	84.507	1.69109e-12
117	49.2896	55.5927	6.30309	105.263	103.448	-1.81488	117	53.6667	57.8544	4.18774	125	120	-5	117	54.9453	54.8323	-0.112995	142.857	142.857	0	117	52.0211	50.8483	-1.17279	81.0811	78.9474	-2.13371
118	51.1323	51.1015	-0.0308432	105.263	107.143	1.8797	118	54.1995	57.3777	3.17827	120	122.449	2.44898	118	54.8708	55.2836	0.412744	142.857	142.857	0	118	51.1047	53.6741	2.56932	83.3333	85.7143	2.38095
119	54.4553	56.9626	2.50725	111.111	107.143	-3.96825	119	54.7005	56.6543	1.95378	122.449	122.449	0	119	51.3324	50.2324	-1.10002	146.341	150	3.65854	119	50.243	51.7686	1.52556	83.3333	85.7143	2.38095
120	50.6746	54.6039	3.9293	107.143	111.111	3.96825	120	52.1851	56.3448	4.15976	117.647	120	2.35294	120	55.0547	51.1609	-3.89374	146.341	150	3.65854	120	49.5615	51.9267	2.36525	82.1918	81.0811	-1.1107
121	52.2198	52.4259	0.206081	105.263	105.263	-2.62901e-12	121	60.3985	61.3757	0.97725	122.449	117.647	-4.80192	121	55.5384	59.6983	4.15989	139.535	139.535	4.63274e-12	121	52.2494	54.5476	2.29821	86.9565	83.3333	-3.62319
122	47.8234	53.9556	6.13213	105.263	105.263	2.62901e-12	122	54.1664	51.8281	-2.33828	122.449	122.449	0	122	54.4974	58.2939	3.79656	139.535	136.364	-3.17125	122	49.935	53.7309	3.79589	85.7143	86.9565	1.24224
123	54.1624	53.9799	-0.182473	103.448	103.448	0	123	54.814	58.7003	3.88621	122.449	122.449	0	123	54.2856	56.5685	2.2829	139.535	139.535	-4.63274e-12	123	51.5381	52.8962	1.35817	83.3333	85.7143	2.38095
124	51.9393	56.6224	4.68309	109.091	107.143	-1.94805	124	55.7256	59.3606	3.63505	122.449	125	2.55102	124	56.8783	55.2878	-1.59049	136.364	139.535	3.17125	124	49.9081	53.9845	4.07637	84.507	83.3333	-1.17371
125	50.3106	51.9709	1.66037	103.448	103.448	0	125	56.6015	59.7098	3.10825	125	125	0	125	52.6933	56.8349	4.14162	139.535	139.535	0	125	47.9346	51.8967	3.96209	85.7143	85.7143	0
126	52.3609	55.793	3.43206	107.143	109.091	1.94805	126	58.0033	59.8396	1.83636	125	122.449	-2.55102	126	51.2835	54.3287	3.04525	139.535	139.535	0	126	48.8215	51.6708	2.84932	84.507	84.507	1.69109e-12
127	55.6889	55.4721	-0.216757	103.448	103.448	0	127	56.7401	61.1729	4.43285	117.647	122.449	4.80192	127	51.1774	50.9585	-0.218837	142.857	142.857	0	127	47.7171	50.8388	3.12171	84.507	82.1918	-2.31526
128	58.0298	59.4681	1.43826	105.263	105.263	0	128	54.9644	59.8178	4.85341	122.449	120	-2.44898	128	54.3308	54.9439	0.613151	139.535	139.535	0	128	48.6603	51.185	2.52469	83.3333	84.507	1.17371
129	57.4978	60.9257	3.42794	107.143	105.263	-1.8797	129	56.0621	57.1951	1.13297	120	120	0	129	48.0767	53.5603	5.48367	139.535	139.535	0	129	48.0116	50.1871	2.17549	84.507	83.3333	-1.17371
130	55.9829	60.3827	4.39974	107.143	107.143	-2.71427e-12	130	54.0478	58.3679	4.32001	122.449	120	-2.44898	130	50.1604	50.3515	0.19113	142.857	142.857	0	130	48.2388	50.5577	2.31884	81.0811	82.1918	1.1107
131	54.9063	57.4065	2.50027	103.448	107.143	3.69458	131	52.6072	56.9677	4.36048	122.449	122.449	0	131	52.8618	56.2179	3.35611	139.535	136.364	-3.17125	131	49.039	52.2777	3.23873	81.0811	85.7143	4.6332
132	54.5246	55.7806	1.25597	109.091	107.143	-1.94805	132	49.6191	55.7137	6.09454	117.647	122.449	4.80192	132	55.6394	56.7777	1.13837	139.535	142.857	3.32226	132	51.3951	56.409	5.01393	89.5522	89.5522	0
133	56.7636	59.0566	2.29305	111.111	107.143	-3.96825	133	50.4005	54.6205	4.21996	125	122.449	-2.55102	133	56.2889	57.1234	0.834453	142.857	142.857	0	133	48.5797	59.9941	11.4144	89.5522	89.5522	0
134	59.7066	61.2683	1.5617	109.091	109.091	0	134	52.2222	56.4138	4.19157	122.449	122.449	3.55271e-12	134	57.6894	59.0159	1.3265	146.341	142.857	-3.48432	134	50.3486	50.0589	-0.289698	81.0811	84.507	3.42596
135	52.6113	51.769	-0.842301	105.263	107.143	1.8797	135	52.2449	55.846	3.60109	120	120	0	135	56.9693	56.028	-0.941246	139.535	142.857	3.32226	135	49.618	52.7534	3.13544	76.9231	75	-1.92308
136	50.0553	54.3733	4.31792	105.263	107.143	1.8797	136	49.6263	55.4003	5.77397	120	122.449	2.44898	136	57.6043	57.4424	-0.161968	139.535	139.535	0	136	49.9602	56.3645	6.40435	83.3333	82.1918	-1.14155
137	53.8415	55.3296	1.48812	107.143	107.143	0	137	53.0365	54.5418	1.50534	122.449	120	-2.44898	137	53.6511	56.8521	3.20109	142.857	139.535	-3.32226	137	50.9101	53.6746	2.76448	81.0811	84.507	3.42596
138	53.1137	55.8318	2.71802	105.263	105.263	0	138	55.9205	57.9697	2.04924	122.449	122.449	3.55271e-12	138	54.5132	53.8573	-0.655858	136.364	136.364	0	138	49.5763	55.1539	5.57758	80	80	0
139	51.769	55.1863	3.41723	107.143	107.143	0	139	51.4005	56.3916	4.99111	117.647	122.449	4.80192	139	53.0884	52.9969	-0.0914266	139.535	142.857	3.32226	139	50.9126	52.8252	1.91265	76.9231	75	-1.92308
140	53.8252	56.1502	2.32494	107.143	105.263	-1.8797	140	53.5584	55.0715	1.51308	120	115.385	-4.61538	140	51.6866	53.5973	1.91065	139.535	139.535	0	140	46.5305	55.0389	8.5084	81.0811	83.3333	2.25225
141	51.5957	57.2051	5.60942	109.091	109.091	0	141	54.9066	59.0751	4.16853	122.449	120	-2.44898	141	54.9209	57.1053	2.18438	136.364	133.333	-3.0303	141	48.3527	52.5506	4.19787	83.3333	82.1918	-1.14155
142	51.2092	54.4391	3.22991	107.143	109.091	1.94805	142	50.7751	54.7986	4.02354	120	122.449	2.44898	142	56.1445	54.4812	-1.66325	136.364	139.535	3.17125	142	44.7575	50.8121	6.05457	78.9474	81.0811	2.13371
143	51.883	55.295	3.41202	103.448	105.263	1.81488	143	54.4026	55.0304	0.627885	122.449	122.449	0	143	54.614	57.5949	2.98081	139.535	139.535	0	143	46.0295	49.3324	3.30285	78.9474	75.9494	-2.998
144	50.9675	54.1341	3.16652	105.263	103.448	-1.81488	144	51.4336	56.9856	5.55196	115.385	120	4.61538	144	54.257	55.066	0.808992	136.364	139.535	3.17125	144	48.3484	51.424	3.07561	81.0811	78.9474	-2.13371
145	52.2902	54.9373	2.64712	105.263	107.143	1.8797	145	56.7671	59.1747	2.40757	122.449	117.647	-4.80192	145	53.7818	56.125	2.34322	139.535	136.364	-3.17125	145	49.4402	53.7895	4.34936	80	84.507	4.50704
146	51.5288	55.3298	3.80102	107.143	105.263	-1.8797	146	57.6615	61.3471	3.68564	122.449	120	-2.44898	146	49.9725	52.9774	3.00487	142.857	142.857	0	146	52.35	52.9215	0.571478	75	75	0
147	52.3037	54.0144	1.71075	98.3607	101.695	3.33426	147	55.0271	57.9163	2.88924	120	122.449	2.44898	147	59.462	59.8841	0.422144	139.535	139.535	4.63274e-12	147	50.2145	57.3296	7.1151	80	77.9221	-2.07792
148	51.5866	56.6044	5.01776	105.263	103.448	-1.81488	148	57.1608	60.9245	3.76368	120	122.449	2.44898	148	55.6935	56.6632	0.969691	139.535	139.535	4.63274e-12	148	50.2609	54.8649	4.60405	84.507	82.1918	-2.31526
149	53.1855	55.4833	2.29783	103.448	103.448	2.52953e-12	149	54.3232	59.8995	5.57626	125	120	-5	149	56.3142	59.1764	2.8622	136.364	139.535	3.17125	149	51.8132	55.4049	3.59168	81.0811	82.1918	1.1107
150	50.8202	54.6166	3.79643	103.448	103.448	0	150	51.8586	51.7829	-0.075775	125	125	0	150	53.0265	57.2644	4.23794	142.857	139.535	-3.32226	150	50.8805	54.0671	3.18656	81.0811	78.9474	-2.13371
151	52.5431	55.3688	2.82565	105.263	103.448	-1.81488	151	55.8266	57.0859	1.25936	125	125	0	151	50.7713	53.7939	3.02258	139.535	142.857	3.32226	151	53.1791	58.545	5.36584	83.3333	86.9565	3.62319
152	52.4248	57.7905	5.36568	101.695	103.448	1.75336	152	53.278	61.6785	8.40048	127.66	125	-2.65957	152	51.3267	53.72	2.39329	142.857	142.857	0	152	51.7199	54.7663	3.0464	81.0811	80	-1.08108
153	51.252	55.8567	4.60466	107.143	107.143	0	153	52.9884	55.4498	2.46139	125	127.66	2.65957	153	53.2105	53.3754	0.164901	142.857	142.857	0	153	53.0455	55.7398	2.69436	77.9221	85.7143	7.79221
154	51.5801	53.9135	2.33337	103.448	101.695	-1.75336	154	48.5864	53.2337	4.64729	127.66	127.66	0	154	52.5105	53.5712	1.06064	142.857	142.857	0	154	47.4141	54.6001	7.186	78.9474	77.9221	-1.02529
155	48.7871	53.5498	4.76267	107.143	109.091	1.94805	155	51.9421	53.7163	1.77423	127.66	127.66	-3.85114e-12	155	56.2491	57.8416	1.59258	139.535	139.535	-4.63274e-12	155	49.637	52.4801	2.84313	81.0811	78.9474	-2.13371
156	47.3988	51.702	4.30315	101.695	100	-1.69492	156	54.8539	56.191	1.33711	125	122.449	-2.55102	156	57.0024	57.8793	0.876849	146.341	142.857	-3.48432	156	53.4786	54.1759	0.697307	78.9474	75.9494	-2.998
157	51.501	51.7372	0.236154	100	101.695	1.69492	157	51.9018	57.0672	5.16544	120	125	5	157	58.1393	58.7027	0.563414	142.857	142.857	0	157	50.8017	54.5451	3.74337	74.0741	81.0811	7.00701
158	51.9951	56.9822	4.98712	105.263	103.448	-1.81488	158	53.48	55.4275	1.94752	127.66	122.449	-5.21059	158	57.7531	60.5022	2.74909	139.535	142.857	3.32226	158	48.9797	57.5518	8.57213	80	76.9231	-3.07692
159	49.7544	54.2351	4.48069	101.695	103.448	1.75336	159	52.1903	56.7006	4.51029	120	122.449	2.44898	159	54.3469	53.2607	-1.08615	146.341	146.341	0	159	52.139	52.0594	-0.0795278	78.9474	78.9474	-2.95586e-12
160	53.1535	54.2385	1.08499	103.448	103.448	-2.52953e-12	160	53.9215	57.2742	3.35273	127.66	127.66	0	160	55.975	55.5646	-0.410428	146.341	142.857	-3.48432	160	52.1691	48.9985	-3.17061	82.1918	84.507	2.31526
161	50.403	56.0547	5.65171	103.448	101.695	-1.75336	161	52.3669	56.7688	4.40189	127.66	127.66	-3.85114e-12	161	58.4319	58.4338	0.00193701	139.535	139.535	-4.63274e-12	161	50.0361	57.7464	7.71025	82.1918	84.507	2.31526
162	50.2173	54.2743	4.05702	103.448	103.448	2.52953e-12	162	54.7199	56.8453	2.12543	125	125	3.70903e-12	162	58.9183	60.4389	1.52055	139.535	139.535	4.63274e-12	162	49.3152	53.2167	3.90153	85.7143	85.7143	3.48166e-12
163	49.8502	53.6091	3.75896	101.695	101.695	-2.44427e-12	163	57.2583	60.399	3.14078	122.449	120	-2.44898	163	55.967	57.6791	1.71213	142.857	142.857	-4.86011e-12	163	51.6702	53.3253	1.65507	82.1918	83.3333	1.14155
164	56.447	57.4799	1.03285	105.263	105.263	0	164	53.1789	58.7506	5.57164	120	125	5	164	56.6594	55.292	-1.36737	139.535	142.857	3.32226	164	52.236	55.4897	3.25368	81.0811	80	-1.08108
165	53.3435	52.5476	-0.795811	101.695	100	-1.69492	165	55.6973	56.6877	0.990411	122.449	120	-2.44898	165	56.302	56.5966	0.294519	142.857	139.535	-3.32226	165	44.4647	52.5752	8.11044	82.1918	82.1918	-3.19744e-12
166	56.5103	60.3975	3.8872	101.695	100	-1.69492	166	55.3114	59.2185	3.90708	120	120	0	166	56.5952	57.6553	1.06005	139.535	139.535	0	166	47.2258	49.3053	2.07948	75	76.9231	1.92308
167	54.2682	57.2376	2.96936	98.3607	100	1.63934	167	56.2627	58.0618	1.79913	120	120	0	167	57.5568	58.965	1.40818	139.535	142.857	3.32226	167	49.4675	52.9733	3.50583	77.9221	77.9221	2.8848e-12
168	53.9013	56.3109	2.40965	101.695	100	-1.69492	168	54.8867	58.7387	3.85203	115.385	117.647	2.26244	168	54.9201	54.023	-0.89707	139.535	136.364	-3.17125	168	51.5962	56.6871	5.09083	82.1918	81.0811	-1.1107
169	55.0081	59.2461	4.23803	96.7742	96.7742	4.43379e-12	169	52.6546	57.6367	4.98215	122.449	120	-2.44898	169	54.6706	56.1123	1.44175	142.857	142.857	0	169	52.8805	53.5847	0.704126	76.9231	80	3.07692
170	58.1418	57.4351	-0.706771	95.2381	98.3607	3.12256	170	55.3063	56.9548	1.64857	117.647	120	2.35294	170	55.5592	55.4005	-0.15868	133.333	136.364	3.0303	170	51.5201	58.07	6.54992	81.0811	78.9474	-2.13371
171	53.7672	61.8458	8.07853	100	98.3607	-1.63934	171	52.8294	56.9921	4.16274	115.385	117.647	2.26244	171	55.3285	57.5316	2.20309	139.535	139.535	0	171	51.7972	53.7712	1.97398	78.9474	82.1918	3.24441
172	55.9291	57.2283	1.29921	100	100	-4.74643e-12	172	53.1962	56.8636	3.66748	117.647	115.385	-2.26244	172	56.8712	55.3064	-1.56486	142.857	139.535	-3.32226	172	45.4121	52.6357	7.22354	80	82.1918	2.19178
173	51.2572	57.1413	5.88414	107.143	107.143	0	173	58.0427	59.5003	1.4576	117.647	117.647	0	173	56.0586	58.5038	2.4452	142.857	142.857	0	173	45.6633	49.9016	4.23834	77.9221	73.1707	-4.75135
174	55.9823	54.0219	-1.96035	103.448	105.263	1.81488	174	57.9293	61.407	3.47768	117.647	115.385	-2.26244	174	56.4345	56.1487	-0.285749	146.341	146.341	5.08749e-12	174	49.2861	52.7737	3.4876	83.3333	82.1918	-1.14155
175	53.9157	58.8806	4.96497	100	98.3607	-1.63934	175	58.9066	63.3143	4.40777	122.449	122.449	-3.55271e-12	175	56.2211	52.8511	-3.36999	139.535	139.535	0	175	49.8827	50.5386	0.655873	75	77.9221	2.92208
176	55.6938	56.4776	0.783798	101.695	101.695	0	176	56.5888	63.5949	7.00611	120	120	0	176	50.2563	54.3495	4.09318	139.535	139.535	0	176	44.9427	52.4718	7.52904	77.9221	76.9231	-0.999001
177	55.0243	57.162	2.13768	98.3607	98.3607	-4.59011e-12	177	58.6216	62.3868	3.76522	127.66	125	-2.65957	177	53.08	54.7843	1.70438	142.857	142.857	0	177	46.8864	50.9374	4.05094	83.3333	83.3333	0
178	53.4046	57.2134	3.80883	100	101.695	1.69492	178	58.1818	55.0194	-3.16246	115.385	115.385	0	178	51.1678	55.6878	4.51998	139.535	136.364	-3.17125	178	47.2272	49.1017	1.87448	77.9221	75.9494	-1.97271
179	54.4337	55.5144	1.08073	101.695	100	-1.69492	179	58.1687	61.666	3.49722	115.385	115.385	0	179	49.836	50.8522	1.01619	142.857	146.341	3.48432	179	45.9897	53.592	7.60227	78.9474	77.9221	-1.02529
180	54.5185	57.2735	2.75501	98.3607	96.7742	-1.58646	180	58.5999	67.9529	9.35297	120	120	0	180	49.2609	50.8128	1.55183	139.535	139.535	-4.63274e-12	180	45.7927	51.8724	6.07969	85.7143	86.9565	1.24224
181	55.0317	59.6773	4.64557	103.448	105.263	1.81488	181	58.8795	62.7542	3.87478	125	125	0	181	48.9952	53.0495	4.05435	139.535	136.364	-3.17125	181	52.4059	53.0502	0.644266	83.3333	83.3333	0
182	52.3285	56.2419	3.91344	103.448	105.263	1.81488	182	58.7562	60.9661	2.20983	120	122.449	2.44898	182	55.3019	54.1924	-1.10956	136.364	139.535	3.17125	182	46.5493	52.2	5.65063	77.9221	82.1918	4.2697
183	50.8443	54.0984	3.25403	100	100	0	183	58.6335	64.046	5.41256	122.449	120	-2.44898	183	56.0445	58.2627	2.21823	142.857	139.535	-3.32226	183	47.1216	51.4327	4.31106	83.3333	80	-3.33333
184	52.9759	56.9512	3.97535	98.3607	98.3607	0	184	58.037	65.3842	7.34717	122.449	122.449	0	184	56.6282	57.7305	1.10234	139.535	139.535	4.63274e-12	184	43.684	46.6065	2.92245	78.9474	78.9474	0
185	52.2637	56.448	4.18434	105.263	101.695	-3.56824	185	56.2616	59.9005	3.63894	122.449	125	2.55102	185	57.0413	60.2091	3.16771	142.857	142.857	-4.86011e-12	185	45.7112	50.8528	5.14161	84.507	83.3333	-1.17371
186	56.5215	56.3667	-0.154822	103.448	105.263	1.81488	186	55.9024	59.0004	3.098	122.449	120	-2.44898	186	57.9729	59.1068	1.13393	142.857	142.857	0	186	47.0058	50.9935	3.98778	83.3333	84.507	1.17371
187	55.4546	60.1737	4.71915	98.3607	96.7742	-1.58646	187	58.7861	64.2887	5.50261	125	122.449	-2.55102	187	55.7306	56.9057	1.17512	136.364	139.535	3.17125	187	47.3921	48.9663	1.57422	78.9474	82.1918	3.24441
188	54.1251	54.7787	0.653637	96.7742	98.3607	1.58646	188	56.6989	62.0307	5.33179	122.449	127.66	5.21059	188	55.3238	58.3312	3.00734	139.535	136.364	-3.17125	188	56.8681	62.1264	5.25833	83.3333	86.9565	3.62319
189	50.9916	57.0962	6.10464	100	98.3607	-1.63934	189	57.7053	58.9	1.19467	127.66	125	-2.65957	189	54.4513	56.1699	1.71854	136.364	139.535	3.17125	189	52.5527	60.7393	8.18656	83.3333	86.9565	3.62319
190	51.2875	53.4053	2.11781	98.3607	101.695	3.33426	190	59.0104	61.3774	2.36703	122.449	122.449	0	190	57.5483	57.1698	-0.378486	142.857	142.857	0	190	54.8885	55.0224	0.133888	80	78.9474	-1.05263
191	51.358	53.7803	2.42228	103.448	101.695	-1.75336	191	55.9949	65.6519	9.65706	117.647	117.647	0	191	58.0109	63.0684	5.05747	133.333	130.435	-2.89855	191	51.2912	60.7066	9.41539	81.0811	81.0811	3.11218e-12
192	57.5011	57.2024	-0.298647	100	103.448	3.44828	192	57.2557	57.2204	-0.0352763	125	125	0	192	56.3193	58.537	2.21764	133.333	136.364	3.0303	192	48.876	49.5682	0.69222	77.9221	98.3607	20.4386
193	55.2463	56.437	1.1907	107.143	107.143	5.42855e-12	193	55.4676	59.1529	3.68533	120	120	0	193	56.2987	56.719	0.420299	139.535	142.857	3.32226	193	45.1826	53.5248	8.3422	78.9474	68.9655	-9.98185
194	58.3089	63.1031	4.79425	107.143	107.143	5.42855e-12	194	57.9169	62.9347	5.01777	120	120	0	194	59.2581	62.6593	3.40117	139.535	133.333	-6.20155	194	48.0372	51.8378	3.80058	83.3333	80	-3.33333
195	57.5844	60.3975	2.81311	101.695	103.448	1.75336	195	57.0834	61.2272	4.14381	125	125	-7.40386e-12	195	55.4787	58.8472	3.36854	139.535	139.535	0	195	45.2684	52.2402	6.97178	83.3333	81.0811	-2.25225
196	55.3006	58.4017	3.10112	103.448	105.263	1.81488	196	58.4119	60.9022	2.49025	115.385	115.385	6.30962e-12	196	55.9609	56.0142	0.0533267	142.857	146.341	3.48432	196	46.8956	50.5575	3.66195	81.0811	81.0811	0
197	57.1968	59.2433	2.04652	100	98.3607	-1.63934	197	57.1205	63.6179	6.49736	122.449	120	-2.44898	197	53.0119	55.108	2.09602	142.857	139.535	-3.32226	197	45.1355	50.7285	5.59301	78.9474	82.1918	3.24441
198	53.808	59.5222	5.71413	100	100	4.74643e-12	198	56.5193	60.6111	4.0918	120	122.449	2.44898	198	57.9202	57.0497	-0.870502	136.364	139.535	3.17125	198	47.6281	50.3329	2.70486	76.9231	78.9474	2.02429
199	56.9756	57.6771	0.701523	101.695	103.448	1.75336	199	56.7722	60.4975	3.72532	120	120	0	199	57.0745	59.1745	2.1	142.857	139.535	-3.32226	199	43.522	45.9681	2.4461	76.9231	89.5522	12.6292
200	58.2155	59.9211	1.70553	96.7742	93.75	-3.02419	200	58.3258	62.2416	3.91573	122.449	125	2.55102	200	52.8691	54.5415	1.67245	139.535	142.857	3.32226	200	44.7665	48.7843	4.01778	77.9221	68.9655	-8.95656
201	54.1725	62.2792	8.10673	101.695	105.263	3.56824	201	58.5571	61.6657	3.10852	122.449	120	-2.44898	201	52.8255	53.272	0.446479	139.535	139.535	0	201	48.5613	49.8526	1.29128	78.9474	73.1707	-5.77664
202	54.1877	55.7159	1.52825	100	98.3607	-1.63934	202	56.5251	62.7043	6.17912	127.66	130.435	2.77521	202	49.6205	53.0713	3.45074	142.857	146.341	3.48432	202	45.9262	51.9416	6.01543	77.9221	83.3333	5.41126
203	50.4612	57.0768	6.61558	100	101.695	1.69492	203	57.2182	59.5497	2.33149	117.647	117.647	0	203	52.9328	65.8529	12.9201	146.341	150	3.65854	203	49.1028	51.7226	2.61981	77.9221	74.0741	-3.848
204	51.7204	53.0828	1.36238	100	100	0	204	58.5184	61.4579	2.93955	120	117.647	-2.35294	204	50.1181	49.7669	-0.351159	146.341	150	3.65854	204	42.7752	52.6677	9.89247	80	85.7143	5.71429
205	51.5653	52.8817	1.31638	96.7742	95.2381	-1.5361	205	59.5688	66.2255	6.65669	120	120	0	205	56.6224	56.6707	0.0482981	139.535	136.364	-3.17125	205	45.2758	45.6719	0.396093	75	75	2.67164e-12
206	57.2277	58.1117	0.884054	101.695	101.695	-4.88853e-12	206	59.7591	61.6594	1.9003	117.647	117.647	0	206	51.0298	62.893	11.8632	136.364	133.333	-3.0303	206	49.3572	53.7429	4.38569	80	75.9494	-4.05063
207	54.855	59.0548	4.19982	100	101.695	1.69492	207	57.5363	71.5981	14.0618	117.647	117.647	0	207	54.6718	54.6598	-0.012018	146.341	150	3.65854	207	45.3984	54.6397	9.24124	85.7143	85.7143	0
208	56.1572	58.255	2.09778	103.448	103.448	0	208	59.2343	53.7086	-5.52568	125	127.66	2.65957	208	54.969	59.8981	4.92904	139.535	136.364	-3.17125	208	48.3831	51.4682	3.08513	82.1918	81.0811	-1.1107
209	54.2298	58.2655	4.03569	101.695	100	-1.69492	209	59.1234	64.7914	5.66804	120	115.385	-4.61538	209	55.9394	59.8023	3.86296	133.333	136.364	3.0303	209	46.5131	56.3838	9.87074	83.3333	83.3333	0
210	52.4156	54.7137	2.29815	96.7742	98.3607	1.58646	210	57.9877	71.2123	13.2245	115.385	120	4.61538	210	53.1147	57.8123	4.69761	142.857	139.535	-3.32226	210	46.1096	42.6904	-3.41922	75.9494	96.7742	20.8248
211	52.4209	56.2623	3.84135	100	98.3607	-1.63934	211	59.0366	60.2123	1.17574	125	120	-5	211	51.7608	54.9717	3.2109	136.364	142.857	6.49351	211	45.85	51.6033	5.75326	76.9231	65.2174	-11.7057
212	54.3314	53.8819	-0.449463	101.695	103.448	1.75336	212	58.2033	62.9833	4.78001	122.449	125	2.55102	212	49.6912	52.036	2.34486	142.857	139.535	-3.32226	212	50.3407	53.3523	3.01168	80	77.9221	-2.07792
213	53.4422	57.8952	4.45297	103.448	101.695	-1.75336	213	55.619	59.327	3.70802	122.449	122.449	0	213	48.8142	55.7443	6.93012	142.857	139.535	-3.32226	213	47.9739	52.5645	4.59056	78.9474	80	1.05263
214	54.7838	54.3904	-0.393431	103.448	101.695	-1.75336	214	59.4746	62.8242	3.34961	120	120	0	214	48.7507	52.1435	3.39285	139.535	142.857	3.32226	214	46.2279	51.3855	5.15764	75	75	2.67164e-12
215	56.4845	56.4617	-0.0227888	96.7742	100	3.22581	215	58.6935	69.2041	10.5105	125	125	0	215	51.7498	51.7878	0.0380626	142.857	142.857	9.6918e-12	215	41.8153	50.4644	8.6491	80	78.9474	-1.05263
216	54.8115	58.1861	3.37463	100	98.3607	-1.63934	216	56.5695	58.8742	2.3047	120	122.449	2.44898	216	52.6872	58.9541	6.26693	142.857	142.857	0	216	50.4265	54.1043	3.67784	76.9231	76.9231	0
217	51.4112	54.6335	3.22233	101.695	103.448	1.75336	217	58.269	60.3088	2.03986	120	117.647	-2.35294	217	53.1436	55.7968	2.65313	150	146.341	-3.65854	217	51.3428	54.5146	3.1718	76.9231	76.9231	0
218	51.6577	54.1689	2.51121	98.3607	98.3607	0	218	54.9679	67.6395	12.6716	122.449	122.449	0	218	48.6082	51.2288	2.62063	136.364	142.857	6.49351	218	46.344	53.9546	7.61067	77.9221	77.9221	-2.8848e-12
219	53.1673	54.1948	1.02744	103.448	100	-3.44828	219	59.4449	59.161	-0.28395	117.647	117.647	0	219	55.0034	44.8915	-10.1119	146.341	142.857	-3.48432	219	44.5142	52.4465	7.93235	83.3333	85.7143	2.38095
220	58.7103	56.9566	-1.75373	100	101.695	1.69492	220	57.338	64.2089	6.8709	122.449	120	-2.44898	220	48.4675	66.5614	18.0939	133.333	133.333	-8.41283e-12	220	50.1435	50.9387	0.795121	81.0811	80	-1.08108
221	54.6709	51.4639	-3.20705	100	98.3607	-1.63934	221	55.4586	59.949	4.49044	122.449	125	2.55102	221	53.0665	53.3236	0.257087	136.364	139.535	3.17125	221	46.1215	49.2145	3.09301	75.9494	98.3607	22.4113
222	56.0969	62.2398	6.14293	100	98.3607	-1.63934	222	58.4038	59.3929	0.989086	117.647	120	2.35294	222	51.3171	53.3991	2.08198	142.857	142.857	9.6918e-12	222	45.0213	54.5931	9.5718	82.1918	67.4157	-14.7761
223	55.9678	57.9361	1.96826	96.7742	100	3.22581	223	58.1389	67.7299	9.591	120	117.647	-2.35294	223	49.8447	53.308	3.46334	142.857	139.535	-3.32226	223	45.665	45.9651	0.300099	75	80	5
224	54.9796	60.2776	5.29794	100	98.3607	-1.63934	224	58.3125	62.9551	4.64257	122.449	122.449	0	224	50.2953	52.4987	2.2034	139.535	142.857	3.32226	224	44.2702	52.05	7.77979	77.9221	72.2892	-5.63292
225	53.9034	59.6231	5.71975	98.3607	100	1.63934	225	58.4493	62.1822	3.73296	117.647	117.647	0	225	47.271	52.1	4.829	130.435	130.435	0	225	43.7192	49.9304	6.21121	77.9221	83.3333	5.41126
226	59.4362	59.6246	0.188357	96.7742	95.2381	-1.5361	226	57.3788	63.7216	6.34281	125	122.449	-2.55102	226	43.1861	49.0085	5.82241	146.341	142.857	-3.48432	226	37.9817	46.186	8.20431	78.9474	75.9494	-2.998
227	57.2324	64.6875	7.45506	101.695	103.448	1.75336	227	56.6505	63.9721	7.32162	117.647	120	2.35294	227	43.915	48.4849	4.56993	139.535	142.857	3.32226	227	39.5715	43.378	3.80645	77.9221	83.3333	5.41126
228	57.1698	58.1334	0.963558	96.7742	96.7742	0	228	55.2481	59.077	3.8289	122.449	125	2.55102	228	44.3072	42.7864	-1.52083	136.364	136.364	0	228	42.1006	45.413	3.31243	81.0811	76.9231	-4.158
229	54.679	60.9311	6.25208	100	100	0	229	57.1509	61.9605	4.80962	115.385	113.208	-2.17707	229	44.2792	49.0443	4.76504	146.341	142.857	-3.48432	229	40.8471	45.3973	4.55022	76.9231	75	-1.92308
230	54.7436	57.215	2.47137	100	96.7742	-3.22581	230	57.89	64.0663	6.17629	122.449	122.449	0	230	44.6894	51.7723	7.08294	139.535	139.535	0	230	40.449	45.9192	5.47021	78.9474	82.1918	3.24441
231	56.4731	58.8788	2.40576	98.3607	100	1.63934	231	56.5256	61.2553	4.72973	117.647	117.647	0	231	50.0133	49.8019	-0.211379	142.857	142.857	-9.6918e-12	231	43.2475	48.7753	5.52782	84.507	78.9474	-5.55967
232	52.5164	57.8609	5.34449	101.695	101.695	-4.88853e-12	232	57.6864	64.3518	6.66538	120	120	0	232	52.3266	53.3828	1.05618	142.857	142.857	9.6918e-12	232	44.3099	48.6101	4.30023	85.7143	89.5522	3.83795
233	54.7188	56.0466	1.32778	101.695	101.695	0	233	58.8404	56.4849	-2.3555	120	125	5	233	47.7964	54.5262	6.72982	139.535	139.535	-9.23706e-12	233	46.6648	43.8168	-2.84803	75.9494	92.3077	16.3583
234	53.0743	57.43	4.35564	100	100	0	234	54.4392	57.3357	2.89653	125	125	0	234	56.8825	54.751	-2.13142	142.857	139.535	-3.32226	234	42.5844	54.9485	12.3641	84.507	71.4286	-13.0785
235	53.9819	54.1883	0.206416	100	100	4.74643e-12	235	58.6772	61.2632	2.58599	125	125	0	235	53.0647	55.7449	2.68021	142.857	139.535	-3.32226	235	41.7112	43.7037	1.99251	83.3333	84.507	1.17371
236	56.0836	62.2025	6.11895	101.695	101.695	0	236	56.1502	69.4827	13.3326	125	122.449	-2.55102	236	53.6256	61.4967	7.87112	142.857	142.857	-9.6918e-12	236	42.3866	46.5338	4.14711	81.0811	78.9474	-2.13371
237	57.3867	57.4568	0.0700662	101.695	100	-1.69492	237	57.3117	57.7754	0.463614	125	127.66	2.65957	237	53.1419	56.12	2.97811	139.535	142.857	3.32226	237	45.0498	50.0246	4.97481	82.1918	82.1918	3.19744e-12
238	56.1427	61.7872	5.64454	105.263	107.143	1.8797	238	55.2823	55.8214	0.539092	130.435	127.66	-2.77521	238	51.1727	53.5819	2.40917	139.535	136.364	-3.17125	238	41.1944	45.9564	4.76206	75.9494	82.1918	6.24241
239	54.8049	56.037	1.23214	101.695	100	-1.69492	239	56.5675	64.2865	7.71905	122.449	122.449	-7.10543e-12	239	51.8437	55.3779	3.53422	139.535	139.535	0	239	42.0699	47.2388	5.1689	77.9221	72.2892	-5.63292
240	55.2999	58.0061	2.70619	100	103.448	3.44828	240	53.9508	59.4377	5.48697	122.449	125	2.55102	240	47.9781	54.4947	6.51667	136.364	139.535	3.17125	240	44.699	48.7394	4.04041	82.1918	77.9221	-4.2697
241	56.2406	59.1196	2.879	101.695	100	-1.69492	241	51.5248	54.854	3.32914	122.449	122.449	0	241	47.7309	50.4527	2.72175	139.535	139.535	-9.23706e-12	241	49.4002	46.8957	-2.50449	78.9474	82.1918	3.24441
242	55.7066	57.609	1.90234	101.695	101.695	0	242	57.8544	61.909	4.05459	122.449	122.449	0	242	49.0292	52.2119	3.18274	153.846	150	-3.84615	242	49.5989	54.4337	4.83487	80	77.9221	-2.07792
243	53.3415	57.6301	4.28867	101.695	103.448	1.75336	243	55.1588	61.4837	6.32485	113.208	115.385	2.17707	243	48.3687	53.3537	4.98498	136.364	136.364	0	243	55.3858	50.7275	-4.65823	74.0741	80	5.92593
244	56.1137	58.3845	2.27074	103.448	100	-3.44828	244	50.6112	55.4538	4.84255	113.208	113.208	0	244	50.6171	50.8362	0.219091	139.535	139.535	0	244	54.4121	52.6574	-1.75472	96.7742	93.75	-3.02419
245	52.2071	57.8334	5.62635	105.263	107.143	1.8797	245	53.7253	59.0824	5.35716	117.647	117.647	6.5512e-12	245	45.6808	53.8167	8.13587	136.364	139.535	3.17125	245	55.2838	64.1677	8.88398	96.7742	93.75	-3.02419
246	57.166	54.9238	-2.24215	93.75	93.75	4.16378e-12	246	50.0864	55.9681	5.88176	117.647	117.647	-6.5512e-12	246	47.7207	52.7551	5.03446	139.535	136.364	-3.17125	246	48.2113	51.9965	3.78522	93.75	100	6.25
247	55.1023	61.4948	6.39246	98.3607	98.3607	-4.59011e-12	247	52.8057	56.0625	3.25678	122.449	122.449	7.10543e-12	247	51.5312	52.8707	1.3395	133.333	136.364	3.0303	247	52.5214	51.6066	-0.914812	95.2381	92.3077	-2.9304
248	58.477	58.3769	-0.10017	98.3607	100	1.63934	248	52.3283	56.4222	4.09388	122.449	122.449	-7.10543e-12	248	47.3428	53.7928	6.45	142.857	139.535	-3.32226	248	49.7828	54.5999	4.81707	96.7742	96.7742	0
249	59.725	59.6917	-0.0333029	98.3607	100	1.63934	249	51.3397	55.6484	4.30868	125	125	7.40386e-12	249	49.0874	49.7331	0.645721	136.364	142.857	6.49351	249	49.6061	49.849	0.242898	92.3077	95.2381	2.9304
250	54.5066	64.9497	10.4431	98.3607	100	1.63934	250	52.3175	57.6752	5.35772	125	125	-7.40386e-12	250	44.041	50.1178	6.07672	139.535	133.333	-6.20155	250	46.8024	48.7164	1.91392	89.5522	86.9565	-2.59572
251	58.8071	62.3425	3.53545	107.143	105.263	-1.8797	251	52.5938	55.9692	3.37539	122.449	120	-2.44898	251	49.5367	53.5682	4.03156	136.364	139.535	3.17125	251	49.0493	49.5409	0.491587	90.9091	95.2381	4.329
252	56.6852	61.5219	4.8367	100	103.448	3.44828	252	51.9962	55.3258	3.32963	120	120	0	252	45.1522	52.3714	7.21926	136.364	136.364	-8.78231e-12	252	48.0406	49.2564	1.21581	88.2353	90.9091	2.6738
253	56.5232	57.7604	1.23721	95.2381	95.2381	4.29168e-12	253	52.779	56.2591	3.48011	115.385	117.647	2.26244	253	43.408	47.4044	3.99646	139.535	136.364	-3.17125	253	49.9744	47.7736	-2.20084	84.507	83.3333	-1.17371
254	54.0163	61.6276	7.61123	96.7742	95.2381	-1.5361	254	50.8196	58.1465	7.3269	125	125	7.40386e-12	254	48.5254	49.1715	0.646038	136.364	139.535	3.17125	254	46.5734	51.2826	4.70924	90.9091	88.2353	-2.6738
255	53.8672	56.0716	2.20437	105.263	105.263	5.24381e-12	255	49.8019	54.5187	4.71686	122.449	122.449	-7.10543e-12	255	45.054	52.4306	7.37656	136.364	136.364	0	255	50.1376	48.763	-1.37461	92.3077	95.2381	2.9304
256	55.4216	55.8084	0.386817	100	101.695	1.69492	256	52.231	54.7978	2.56685	113.208	113.208	0	256	46.4711	50.0855	3.61446	142.857	139.535	-3.32226	256	44.8569	51.8793	7.0224	90.9091	89.5522	-1.35685
257	56.0134	60.6929	4.67952	98.3607	98.3607	-4.59011e-12	257	53.6609	57.2456	3.58468	125	122.449	-2.55102	257	45.5526	51.2481	5.69542	136.364	139.535	3.17125	257	46.011	46.9089	0.897933	89.5522	90.9091	1.35685
258	56.0623	59.3001	3.23773	98.3607	96.7742	-1.58646	258	50.6941	56.3305	5.6364	125	125	0	258	52.0822	53.6892	1.60699	136.364	136.364	0	258	44.7861	47.6919	2.90584	92.3077	89.5522	-2.75545
259	51.419	57.3986	5.97964	101.695	103.448	1.75336	259	52.959	55.5633	2.6043	120	122.449	2.44898	259	51.4044	53.1111	1.70677	136.364	136.364	0	259	47.5395	47.263	-0.276486	92.3077	92.3077	0
260	53.2129	57.1441	3.93117	101.695	101.695	0	260	54.0452	58.0543	4.00911	122.449	122.449	7.10543e-12	260	50.3142	55.0871	4.77293	130.435	127.66	-2.77521	260	47.6738	50.2847	2.61089	93.75	95.2381	1.4881
261	57.4176	58.1297	0.712079	100	98.3607	-1.63934	261	55.4383	55.0252	-0.413153	117.647	122.449	4.80192	261	49.0781	56.2964	7.21833	136.364	136.364	0	261	49.388	49.6155	0.227551	90.9091	89.5522	-1.35685
262	58.4129	60.0108	1.59788	101.695	101.695	0	262	54.7379	51.1805	-3.55744	122.449	117.647	-4.80192	262	46.6282	50.2465	3.61824	133.333	136.364	3.0303	262	47.9294	51.4912	3.56183	88.2353	90.9091	2.6738
263	54.4933	58.4025	3.90915	101.695	101.695	0	263	52.2597	63.6791	11.4194	122.449	117.647	-4.80192	263	48.4822	48.4463	-0.0358183	136.364	136.364	0	263	47.3393	48.9585	1.61914	92.3077	89.5522	-2.75545
264	49.3984	53.983	4.58463	98.3607	101.695	3.33426	264	51.239	60.4349	9.19587	120	122.449	2.44898	264	49.6547	54.5586	4.90391	133.333	133.333	0	264	44.4888	47.9042	3.41545	88.2353	93.75	5.51471
265	53.1423	55.0307	1.88837	98.3607	95.2381	-3.12256	265	55.6368	54.8154	-0.8214	117.647	122.449	4.80192	265	53.7164	55.4034	1.68702	136.364	139.535	3.17125	265	47.6376	48.8155	1.17787	92.3077	88.2353	-4.0724
266	50.9568	54.31	3.35324	98.3607	101.695	3.33426	266	50.3584	59.158	8.79958	125	120	-5	266	49.4147	54.0225	4.60786	136.364	133.333	-3.0303	266	45.2763	47.6418	2.36544	90.9091	93.75	2.84091
267	54.6664	56.7247	2.05831	105.263	101.695	-3.56824	267	55.6038	60.7253	5.1215	120	122.449	2.44898	267	50.7117	51.846	1.1343	136.364	139.535	3.17125	267	46.0622	48.0737	2.01157	90.9091	89.5522	-1.35685
268	54.0745	55.3795	1.30502	96.7742	98.3607	1.58646	268	53.2083	57.9894	4.78115	113.208	115.385	2.17707	268	51.009	55.1529	4.14386	136.364	136.364	0	268	47.0782	46.3199	-0.758217	85.7143	89.5522	3.83795
269	52.1266	54.3527	2.22607	96.7742	98.3607	1.58646	269	52.9649	56.6784	3.71345	113.208	113.208	0	269	52.3525	56.8839	4.53137	136.364	136.364	0	269	45.8472	47.4132	1.56608	88.2353	84.507	-3.72825
270	50.3289	53.0155	2.68659	95.2381	95.2381	0	270	51.7096	57.8969	6.18731	120	117.647	-2.35294	270	53.5583	55.0364	1.47813	142.857	139.535	-3.32226	270	44.8028	46.6167	1.81384	88.2353	90.9091	2.6738
271	54.1957	54.2849	0.0892604	100	98.3607	-1.63934	271	48.2199	55.6002	7.38028	122.449	122.449	7.10543e-12	271	59.1287	57.9007	-1.22793	142.857	139.535	-3.32226	271	44.6855	44.7083	0.022815	85.7143	86.9565	1.24224
272	56.6709	58.7631	2.09223	101.695	100	-1.69492	272	52.3812	55.004	2.62279	120	120	0	272	55.4993	66.8488	11.3495	139.535	139.535	0	272	44.7543	46.9732	2.21894	88.2353	90.9091	2.6738
273	56.0355	57.6507	1.61513	98.3607	100	1.63934	273	52.8805	57.2257	4.34518	120	120	0	273	57.4146	58.2887	0.874106	133.333	139.535	6.20155	273	48.1962	47.9157	-0.280489	90.9091	83.3333	-7.57576
274	54.9786	60.551	5.57236	100	100	0	274	46.3676	55.3528	8.98518	125	125	-7.40386e-12	274	53.9953	54.6829	0.687542	139.535	139.535	0	274	47.6889	50.4991	2.81022	92.3077	90.9091	-1.3986
275	53.3724	56.738	3.36561	103.448	103.448	0	275	51.2822	49.7824	-1.49974	120	120	0	275	55.5506	61.5602	6.00956	142.857	139.535	-3.32226	275	45.9353	45.9435	0.00828191	90.9091	92.3077	1.3986
276	58.2603	56.3436	-1.91673	100	100	0	276	49.5567	57.0517	7.495	120	120	0	276	53.33	59.2521	5.92204	136.364	136.364	0	276	46.8693	48.6007	1.73146	90.9091	92.3077	1.3986
277	56.6362	60.4173	3.78112	101.695	105.263	3.56824	277	48.9394	54.0774	5.13793	120	122.449	2.44898	277	53.3819	54.6433	1.26134	133.333	136.364	3.0303	277	45.1978	47.7496	2.55185	89.5522	89.5522	-7.60281e-12
278	57.3449	59.5842	2.23932	101.695	105.263	3.56824	278	45.0901	52.0329	6.94277	125	122.449	-2.55102	278	54.1485	60.5322	6.38367	136.364	133.333	-3.0303	278	45.1243	47.8235	2.69927	95.2381	93.75	-1.4881
279	56.5466	60.7024	4.15575	98.3607	98.3607	-4.59011e-12	279	44.1823	48.5889	4.4066	122.449	122.449	0	279	55.2743	58.5419	3.26762	130.435	130.435	0	279	45.8137	47.4068	1.59318	89.5522	90.9091	1.35685
280	57.5746	59.4662	1.89166	100	98.3607	-1.63934	280	46.9616	50.0745	3.11286	117.647	117.647	0	280	53.7396	53.2456	-0.494026	136.364	136.364	0	280	49.0658	49.6828	0.617027	92.3077	89.5522	-2.75545
281	57.8149	61.8783	4.06341	100	100	0	281	43.8873	51.2678	7.38047	120	120	0	281	53.7528	57.8648	4.11196	136.364	136.364	0	281	47.771	51.02	3.249	90.9091	92.3077	1.3986
282	57.9151	60.816	2.90094	100	101.695	1.69492	282	49.3101	51.884	2.57396	117.647	120	2.35294	282	53.9281	61.3765	7.44845	125	127.66	2.65957	282	44.2431	48.4717	4.22861	86.9565	90.9091	3.95257
283	56.8358	61.5432	4.70737	100	98.3607	-1.63934	283	48.2946	53.0192	4.72462	120	120	0	283	55.4354	54.8427	-0.592692	127.66	127.66	0	283	48.7142	48.7079	-0.00634826	93.75	95.2381	1.4881
284	56.2868	57.65	1.36324	100	101.695	1.69492	284	43.1643	50.2974	7.13314	122.449	120	-2.44898	284	55.6966	62.8609	7.16436	133.333	133.333	0	284	46.6759	47.9087	1.23281	88.2353	86.9565	-1.27877
285	54.9371	58.2986	3.36156	101.695	101.695	4.88853e-12	285	45.6666	48.7011	3.03454	125	125	7.40386e-12	285	54.7961	58.5959	3.79976	136.364	136.364	0	285	47.4172	47.9122	0.495029	86.9565	88.2353	1.27877
286	56.7141	58.9255	2.21138	98.3607	98.3607	0	286	45.722	50.5998	4.87783	122.449	122.449	-7.10543e-12	286	54.3168	57.229	2.91224	133.333	130.435	-2.89855	286	48.78	50.5324	1.75246	90.9091	88.2353	-2.6738
287	53.7107	56.757	3.04633	98.3607	101.695	3.33426	287	50.7117	51.1573	0.445588	115.385	117.647	2.26244	287	54.89	59.0352	4.14522	136.364	136.364	0	287	46.4977	49.9229	3.42517	86.9565	88.2353	1.27877
288	53.8746	57.8836	4.00895	96.7742	93.75	-3.02419	288	45.0903	55.0984	10.0081	117.647	115.385	-2.26244	288	53.9843	55.2024	1.21806	136.364	139.535	3.17125	288	43.8814	49.2223	5.3409	86.9565	88.2353	1.27877
289	56.34	57.9637	1.62368	98.3607	98.3607	0	289	51.6768	52.0342	0.357396	120	122.449	2.44898	289	52.8121	55.4068	2.59473	136.364	133.333	-3.0303	289	45.3503	46.5516	1.20127	85.7143	84.507	-1.20724
290	56.0571	58.8231	2.76604	100	101.695	1.69492	290	56.0896	53.95	-2.13959	122.449	120	-2.44898	290	50.1887	53.1131	2.92437	139.535	139.535	0	290	45.1313	48.1095	2.97821	89.5522	85.7143	-3.83795
291	56.1178	57.8501	1.73222	100	98.3607	-1.63934	291	53.7778	65.571	11.7932	122.449	120	-2.44898	291	51.0994	52.9457	1.84629	139.535	142.857	3.32226	291	47.9142	44.5034	-3.41082	88.2353	92.3077	4.0724
292	54.575	58.3374	3.76241	100	101.695	1.69492	292	51.2672	53.14	1.87274	115.385	120	4.61538	292	52.1881	54.777	2.5889	130.435	130.435	0	292	47.1449	48.7036	1.55869	89.5522	88.2353	-1.31694
293	54.1552	55.8374	1.68219	100	98.3607	-1.63934	293	52.4574	55.2424	2.785	120	115.385	-4.61538	293	54.7008	58.6128	3.91192	139.535	136.364	-3.17125	293	47.9439	49.0971	1.15315	89.5522	89.5522	0
294	55.7504	57.6184	1.86804	98.3607	96.7742	-1.58646	294	50.4272	58.7198	8.29263	122.449	122.449	0	294	52.0235	58.3262	6.30269	142.857	142.857	-9.6918e-12	294	48.6988	49.0189	0.320083	90.9091	89.5522	-1.35685
295	52.4466	57.1882	4.74164	95.2381	96.7742	1.5361	295	54.8885	56.1169	1.22835	122.449	125	2.55102	295	53.9783	53.5079	-0.470441	136.364	136.364	0	295	46.8634	48.2128	1.34935	86.9565	86.9565	0
296	55.9003	53.7913	-2.10899	100	100	-4.74643e-12	296	54.3448	57.7091	3.36435	115.385	115.385	0	296	55.6706	54.1303	-1.5403	133.333	136.364	3.0303	296	49.4062	48.657	-0.749268	88.2353	88.2353	0
297	53.6474	58.0574	4.41001	100	100	4.74643e-12	297	55.4607	60.7171	5.25646	117.647	117.647	0	297	57.2152	58.2575	1.04233	139.535	139.535	-9.23706e-12	297	46.9119	49.5343	2.62236	86.9565	88.2353	1.27877
298	54.6605	56.1261	1.46552	101.695	101.695	0	298	53.0067	59.1837	6.177	120	120	0	298	56.5609	66.8518	10.2909	133.333	133.333	8.41283e-12	298	44.6842	48.1171	3.43289	89.5522	89.5522	-7.60281e-12
299	50.5899	56.166	5.57608	100	101.695	1.69492	299	52.7206	54.3998	1.67922	122.449	125	2.55102	299	56.6395	76.845	20.2055	142.857	146.341	3.48432	299	45.5077	47.847	2.33935	90.9091	90.9091	7.83018e-12
300	56.1481	55.644	-0.504035	100	100	0	300	48.337	54.6021	6.26505	120	117.647	-2.35294	300	58.9612	57.2473	-1.7139	142.857	146.341	3.48432	300	45.261	46.3288	1.06783	85.7143	89.5522	3.83795
301	53.7465	57.954	4.20752	100	100	0	301	52.0696	53.6545	1.58482	115.385	117.647	2.26244	301	57.2262	61.7934	4.56715	136.364	136.364	0	301	45.2544	46.1983	0.943986	82.1918	84.507	2.31526
302	54.6021	56.0627	1.46063	101.695	100	-1.69492	302	50.946	56.4469	5.50092	120	117.647	-2.35294	302	56.437	59.8578	3.42082	139.535	142.857	3.32226	302	45.8982	48.7775	2.87928	86.9565	82.1918	-4.76474
303	53.7831	58.1215	4.33836	101.695	103.448	1.75336	303	51.8373	54.7866	2.94927	120	122.449	2.44898	303	55.6409	61.0915	5.4506	142.857	139.535	-3.32226	303	45.903	47.6788	1.7758	90.9091	90.9091	7.83018e-12
304	58.9069	58.7726	-0.134284	103.448	103.448	0	304	51.8748	54.5737	2.69885	115.385	115.385	-6.30962e-12	304	58.2061	61.6433	3.43718	139.535	139.535	0	304	48.5216	50.0772	1.55557	92.3077	90.9091	-1.3986
305	55.9922	59.3736	3.38143	111.111	111.111	0	305	51.4505	56.8473	5.39681	117.647	115.385	-2.26244	305	55.6975	58.0715	2.37397	142.857	142.857	-9.6918e-12	305	49.0301	48.9949	-0.0352718	95.2381	92.3077	-2.9304
306	52.8773	53.5196	0.642288	111.111	111.111	0	306	47.1936	53.2534	6.05975	120	122.449	2.44898	306	56.2108	57.73	1.51915	139.535	139.535	9.23706e-12	306	49.3812	53.4762	4.09499	95.2381	92.3077	-2.9304
307	55.0762	55.6813	0.605109	115.385	115.385	0	307	51.4142	53.6552	2.24106	120	117.647	-2.35294	307	55.9844	56.9319	0.947468	139.535	142.857	3.32226	307	46.2784	45.9743	-0.304188	88.2353	89.5522	1.31694
308	55.8713	57.9642	2.09285	113.208	113.208	0	308	47.5629	53.7163	6.15336	120	122.449	2.44898	308	54.8156	61.2015	6.38583	136.364	133.333	-3.0303	308	50.0029	50.0578	0.0548907	88.2353	88.2353	0
309	55.9179	56.77	0.852124	109.091	109.091	0	309	53.1112	53.6554	0.544201	120	120	0	309	52.3489	59.1094	6.76047	146.341	146.341	0	309	52.246	52.3608	0.114793	96.7742	96.7742	8.86757e-12
310	51.9052	57.1641	5.25883	109.091	109.091	0	310	51.1619	56.3516	5.18964	120	120	0	310	54.8864	51.369	-3.51746	133.333	139.535	6.20155	310	52.3481	48.5746	-3.77354	86.9565	88.2353	1.27877
311	52.0335	54.0226	1.98908	107.143	107.143	0	311	51.4778	54.8839	3.40609	122.449	120	-2.44898	311	54.3856	55.8503	1.46462	139.535	136.364	-3.17125	311	46.6514	54.4855	7.83412	93.75	92.3077	-1.44231
312	49.0174	52.9702	3.95284	105.263	107.143	1.8797	312	48.8742	52.2523	3.3781	117.647	120	2.35294	312	52.8715	63.2272	10.3557	136.364	133.333	-3.0303	312	45.7657	46.019	0.253351	90.9091	90.9091	7.83018e-12
313	51.8926	52.2059	0.313294	100	103.448	3.44828	313	45.1509	50.005	4.85408	122.449	122.449	-7.10543e-12	313	54.3306	53.8121	-0.518562	130.435	136.364	5.92885	313	44.1617	48.1918	4.03002	92.3077	93.75	1.44231
314	57.0759	55.6465	-1.42947	103.448	100	-3.44828	314	47.5288	50.2105	2.68173	125	122.449	-2.55102	314	48.6163	52.8906	4.2743	146.341	139.535	-6.80658	314	48.4215	47.1209	-1.30059	93.75	92.3077	-1.44231
315	58.9873	60.1134	1.12605	105.263	103.448	-1.81488	315	47.4631	52.6757	5.21264	120	120	0	315	52.1551	59.1312	6.97615	136.364	136.364	-8.78231e-12	315	51.5281	50.0384	-1.48972	90.9091	90.9091	-7.83018e-12
316	57.5845	61.9563	4.37176	105.263	107.143	1.8797	316	50.3283	51.2267	0.898394	117.647	120	2.35294	316	50.2341	52.7945	2.56037	150	146.341	-3.65854	316	45.7113	49.7711	4.05978	86.9565	92.3077	5.35117
317	55.6415	57.4247	1.78323	107.143	107.143	0	317	53.5703	56.1285	2.55818	125	122.449	-2.55102	317	51.9687	52.5525	0.583773	139.535	146.341	6.80658	317	45.7068	48.8028	3.09603	92.3077	86.9565	-5.35117
318	52.1718	57.4706	5.29876	111.111	111.111	5.85487e-12	318	50.4714	54.6019	4.13048	117.647	117.647	6.5512e-12	318	52.3538	48.4803	-3.87349	139.535	139.535	-9.23706e-12	318	46.7711	46.1891	-0.581995	88.2353	90.9091	2.6738
319	53.9884	53.1547	-0.8337	107.143	107.143	0	319	53.3134	57.1874	3.87405	117.647	117.647	6.5512e-12	319	51.0206	59.8233	8.80268	139.535	136.364	-3.17125	319	46.5324	49.1813	2.64888	90.9091	89.5522	-1.35685
320	54.5423	55.2245	0.682197	101.695	103.448	1.75336	320	50.4291	53.9866	3.55744	120	122.449	2.44898	320	51.0198	57.2689	6.2491	139.535	142.857	3.32226	320	45.99	47.0118	1.02179	89.5522	93.75	4.19776
321	54.2691	56.8028	2.53375	101.695	101.695	4.88853e-12	321	55.7453	59.0412	3.29594	120	117.647	-2.35294	321	53.2841	52.7877	-0.496456	142.857	142.857	0	321	47.3644	48.1704	0.806023	85.7143	84.507	-1.20724
322	52.5673	55.3516	2.78436	105.263	103.448	-1.81488	322	55.0721	63.8171	8.74499	117.647	117.647	-6.5512e-12	322	53.2411	55.5633	2.32222	133.333	133.333	0	322	46.6725	47.5999	0.927351	86.9565	92.3077	5.35117
323	50.9846	52.9933	2.00868	103.448	107.143	3.69458	323	56.7896	55.6146	-1.17502	115.385	117.647	2.26244	323	53.6905	54.1998	0.509278	142.857	142.857	0	323	45.4786	47.1694	1.69078	85.7143	82.1918	-3.5225
324	52.0055	52.0644	0.058979	103.448	103.448	5.07328e-12	324	55.4373	62.5009	7.06363	115.385	115.385	-6.30962e-12	324	51.6654	58.0515	6.38608	139.535	139.535	0	324	42.921	47.1595	4.23851	89.5522	88.2353	-1.31694
325	51.1674	53.0038	1.83639	101.695	101.695	0	325	56.7511	58.8122	2.06105	113.208	113.208	0	325	53.3577	52.2469	-1.1108	142.857	142.857	-9.6918e-12	325	46.6093	46.8333	0.223927	92.3077	88.2353	-4.0724
326	51.5782	53.2604	1.68218	105.263	105.263	-5.24381e-12	326	53.986	60.9467	6.96072	111.111	111.111	0	326	53.9465	59.6668	5.72021	139.535	139.535	9.23706e-12	326	46.3489	46.5881	0.239208	83.3333	89.5522	6.21891
327	51.399	51.274	-0.12499	101.695	101.695	4.88853e-12	327	54.4522	58.4145	3.96233	122.449	120	-2.44898	327	59.164	59.4336	0.269615	142.857	142.857	0	327	49.2375	51.1169	1.87939	84.507	85.7143	1.20724
328	51.9583	53.1099	1.15151	101.695	101.695	0	328	50.897	57.367	6.47001	115.385	117.647	2.26244	328	57.5573	74.3102	16.7529	139.535	146.341	6.80658	328	51.3882	50.4763	-0.911912	84.507	81.0811	-3.42596
329	51.0321	53.1337	2.10154	105.263	103.448	-1.81488	329	48.882	54.1994	5.31733	125	122.449	-2.55102	329	53.7048	55.6991	1.9943	139.535	146.341	6.80658	329	45.8812	50.8629	4.98175	82.1918	81.0811	-1.1107
330	54.2441	53.7896	-0.454572	103.448	98.3607	-5.08762	330	51.8504	56.6306	4.78013	120	120	0	330	55.9939	49.0203	-6.97359	146.341	142.857	-3.48432	330	47.6153	49.912	2.29673	84.507	83.3333	-1.17371
331	49.6654	54.999	5.33364	100	107.143	7.14286	331	57.1305	61.2145	4.08395	120	117.647	-2.35294	331	52.3672	60.6997	8.33252	146.341	142.857	-3.48432	331	48.3111	49.0864	0.775257	86.9565	85.7143	-1.24224
332	51.3565	51.2118	-0.144652	109.091	107.143	-1.94805	332	51.1882	57.9567	6.76854	117.647	120	2.35294	332	54.6058	61.0443	6.43853	139.535	142.857	3.32226	332	49.8467	49.8441	-0.00252801	88.2353	90.9091	2.6738
333	49.0842	53.7453	4.66106	107.143	107.143	0	333	52.3189	55.6837	3.36484	117.647	120	2.35294	333	56.7015	56.3408	-0.360639	146.341	150	3.65854	333	46.517	49.53	3.01295	92.3077	90.9091	-1.3986
334	49.7713	47.1642	-2.60705	105.263	103.448	-1.81488	334	51.3874	55.8713	4.48388	125	120	-5	334	55.1347	58.8835	3.74875	139.535	139.535	0	334	46.1868	50.571	4.38415	92.3077	90.9091	-1.3986
335	55.3829	57.4122	2.02925	105.263	103.448	-1.81488	335	53.7692	57.7116	3.94239	117.647	120	2.35294	335	53.8999	54.8641	0.964247	139.535	139.535	-9.23706e-12	335	44.7518	43.8016	-0.950109	83.3333	90.9091	7.57576
336	52.1592	57.4796	5.32038	105.263	105.263	0	336	49.8914	56.4159	6.52442	125	125	0	336	52.4794	55.7048	3.2254	146.341	142.857	-3.48432	336	45.3313	48.5378	3.20649	84.507	80	-4.50704
337	51.5529	52.3672	0.814327	105.263	107.143	1.8797	337	46.5124	51.8539	5.34157	122.449	122.449	7.10543e-12	337	50.1886	56.319	6.13039	136.364	139.535	3.17125	337	48.9388	51.0142	2.07539	89.5522	89.5522	0
338	54.3593	54.9746	0.615239	107.143	105.263	-1.8797	338	51.7739	53.4365	1.66262	117.647	117.647	-6.5512e-12	338	54.561	52.7046	-1.85641	139.535	139.535	-9.23706e-12	338	47.7426	50.4642	2.72161	84.507	89.5522	5.0452
339	56.6638	57.8198	1.15595	103.448	103.448	1.01466e-11	339	44.0058	53.8626	9.85683	120	122.449	2.44898	339	51.2779	57.1496	5.87171	146.341	142.857	-3.48432	339	47.6392	49.1695	1.5303	82.1918	78.9474	-3.24441
340	54.705	57.0192	2.31424	105.263	107.143	1.8797	340	53.237	49.801	-3.43596	117.647	115.385	-2.26244	340	52.4677	55.8037	3.33603	139.535	142.857	3.32226	340	46.9366	50.6889	3.7523	86.9565	88.2353	1.27877
341	53.9271	55.0099	1.08283	105.263	105.263	0	341	45.6858	58.1437	12.458	120	120	0	341	47.7397	50.543	2.80337	142.857	142.857	0	341	48.3345	47.7787	-0.555779	84.507	86.9565	2.44948
342	53.0209	55.6058	2.58494	105.263	105.263	-1.05018e-11	342	50.2095	50.5678	0.35824	117.647	120	2.35294	342	49.6133	51.7263	2.11295	136.364	136.364	0	342	46.0746	48.7409	2.66625	83.3333	82.1918	-1.14155
343	54.005	54.6572	0.652196	107.143	105.263	-1.8797	343	49.0056	54.7695	5.76392	122.449	120	-2.44898	343	52.1323	57.2411	5.10881	139.535	136.364	-3.17125	343	50.4274	48.926	-1.5014	85.7143	80	-5.71429
344	53.4088	54.3177	0.908887	103.448	101.695	-1.75336	344	53.8064	56.5135	2.70706	117.647	120	2.35294	344	53.3105	56.379	3.06849	133.333	136.364	3.0303	344	43.7202	48.7407	5.02051	81.0811	85.7143	4.6332
345	54.2676	55.6427	1.37506	103.448	105.263	1.81488	345	51.8416	57.1612	5.31959	120	117.647	-2.35294	345	54.4121	54.9511	0.53903	139.535	139.535	0	345	43.9609	47.776	3.81506	89.5522	89.5522	7.60281e-12
346	50.7233	53.9888	3.26555	103.448	105.263	1.81488	346	51.3174	53.0398	1.7224	120	122.449	2.44898	346	54.678	57.5672	2.88917	136.364	136.364	0	346	44.7634	46.2101	1.44671	92.3077	88.2353	-4.0724
347	51.6971	52.7758	1.07874	100	98.3607	-1.63934	347	50.8526	55.2535	4.4009	120	122.449	2.44898	347	55.0651	57.2683	2.20322	139.535	139.535	0	347	44.3915	46.5376	2.1461	89.5522	90.9091	1.35685
348	51.6301	54.1581	2.52807	101.695	103.448	1.75336	348	49.6297	59.0924	9.46275	120	120	0	348	49.7289	54.0751	4.34614	136.364	136.364	0	348	46.5527	47.7464	1.19371	88.2353	86.9565	-1.27877
349	55.9656	54.7615	-1.20415	100	98.3607	-1.63934	349	53.9403	53.8065	-0.133742	120	120	0	349	52.9866	52.4603	-0.526365	142.857	142.857	0	349	41.6959	45.1777	3.48175	84.507	85.7143	1.20724
350	52.3673	57.8064	5.43904	100	100	0	350	54.145	58.0152	3.87016	120	117.647	-2.35294	350	49.7274	54.8858	5.15836	136.364	139.535	3.17125	350	43.121	43.4769	0.355945	85.7143	86.9565	1.24224
351	50.4342	52.7109	2.27669	98.3607	101.695	3.33426	351	49.2788	57.4144	8.1356	122.449	120	-2.44898	351	53.864	52.5122	-1.35179	142.857	139.535	-3.32226	351	44.5228	48.1933	3.67056	92.3077	92.3077	-8.07177e-12
352	55.9334	54.9291	-1.00428	101.695	98.3607	-3.33426	352	52.0082	52.2049	0.196661	113.208	117.647	4.43951	352	55.8029	57.8949	2.09194	136.364	136.364	0	352	43.7416	44.3197	0.578074	84.507	85.7143	1.20724
353	52.8999	54.2001	1.30019	96.7742	105.263	8.48896	353	48.3416	54.8032	6.46162	113.208	113.208	0	353	52.8815	55.8095	2.92794	136.364	136.364	0	353	44.1696	49.0165	4.84689	88.2353	85.7143	-2.52101
354	53.2828	55.1083	1.82544	96.7742	92.3077	-4.4665	354	51.9522	55.6495	3.69726	122.449	120	-2.44898	354	54.6657	56.1104	1.44474	136.364	136.364	0	354	43.6247	48.7298	5.10508	88.2353	92.3077	4.0724
355	52.4691	54.9521	2.48298	98.3607	96.7742	-1.58646	355	49.8001	55.7691	5.96897	115.385	120	4.61538	355	53.2123	55.352	2.13977	142.857	142.857	0	355	45.4695	47.4468	1.97729	86.9565	83.3333	-3.62319
356	56.3264	56.0394	-0.28706	103.448	101.695	-1.75336	356	48.1689	54.0282	5.85937	117.647	115.385	-2.26244	356	57.2187	57.4586	0.239886	142.857	142.857	0	356	45.7012	47.2931	1.59188	89.5522	89.5522	-7.60281e-12
357	53.9547	58.31	4.35535	103.448	105.263	1.81488	357	48.8699	53.7136	4.84373	117.647	117.647	-6.5512e-12	357	56.2393	58.5182	2.27888	139.535	142.857	3.32226	357	45.6113	49.5271	3.91571	85.7143	86.9565	1.24224
358	56.9273	57.9143	0.987008	103.448	101.695	-1.75336	358	52.0582	56.5894	4.53115	117.647	117.647	6.5512e-12	358	56.8281	54.6438	-2.18423	139.535	142.857	3.32226	358	47.2264	48.5756	1.34917	88.2353	90.9091	2.6738
359	53.047	56.9059	3.85885	100	101.695	1.69492	359	48.3782	55.259	6.88076	117.647	115.385	-2.26244	359	55.2335	61.4031	6.16959	142.857	139.535	-3.32226	359	46.5659	48.9639	2.39794	88.2353	86.9565	-1.27877
360	53.5136	57.4484	3.93477	101.695	100	-1.69492	360	50.7793	52.6534	1.87412	120	122.449	2.44898	360	58.8033	61.7091	2.90576	139.535	139.535	0	360	50.298	48.5365	-1.7615	83.3333	82.1918	-1.14155
361	55.182	55.4299	0.247925	101.695	103.448	1.75336	361	50.656	57.3312	6.67516	113.208	113.208	0	361	56.5527	56.7044	0.151792	139.535	139.535	-9.23706e-12	361	52.9381	54.2455	1.30743	85.7143	88.2353	2.52101
362	53.9128	54.0842	0.171399	109.091	103.448	-5.64263	362	45.7166	53.5169	7.80033	125	122.449	-2.55102	362	57.2153	61.47	4.25473	139.535	142.857	3.32226	362	47.6237	53.4537	5.83008	85.7143	88.2353	2.52101
363	55.9891	60.0921	4.10298	109.091	103.448	-5.64263	363	50.1746	51.0146	0.840076	120	120	0	363	55.8307	59.1229	3.29215	142.857	142.857	0	363	50.2456	50.3666	0.120987	89.5522	88.2353	-1.31694
364	53.3289	58.5258	5.19691	105.263	107.143	1.8797	364	50.3492	58.4484	8.09917	122.449	120	-2.44898	364	54.8129	57.9647	3.15178	139.535	139.535	-9.23706e-12	364	47.2857	48.7397	1.45402	84.507	85.7143	1.20724
365	56.211	56.8486	0.637625	107.143	107.143	0	365	52.4783	53.5654	1.08712	122.449	127.66	5.21059	365	53.6977	57.1899	3.49224	139.535	142.857	3.32226	365	45.2758	48.404	3.12818	86.9565	86.9565	0
366	55.5057	56.0826	0.576894	105.263	107.143	1.8797	366	52.6056	55.8369	3.23134	115.385	115.385	-6.30962e-12	366	55.0803	53.988	-1.09231	139.535	136.364	-3.17125	366	49.7358	49.3585	-0.377358	86.9565	84.507	-2.44948
367	55.3228	58.38	3.05726	107.143	103.448	-3.69458	367	55.0516	60.9887	5.9371	117.647	115.385	-2.26244	367	54.3726	59.6199	5.24724	139.535	136.364	-3.17125	367	46.0947	48.9366	2.84196	86.9565	89.5522	2.59572
368	57.0906	57.3644	0.27386	109.091	111.111	2.0202	368	54.2856	59.4211	5.13551	115.385	117.647	2.26244	368	55.1554	56.8822	1.72678	130.435	133.333	2.89855	368	47.6905	49.2221	1.53156	89.5522	88.2353	-1.31694
369	50.5943	53.4823	2.88801	101.695	103.448	1.75336	369	52.8953	58.2692	5.37391	117.647	115.385	-2.26244	369	51.385	56.5852	5.20024	139.535	139.535	9.23706e-12	369	50.4669	50.9975	0.530576	93.75	95.2381	1.4881
370	51.2226	50.947	-0.275597	103.448	107.143	3.69458	370	49.7239	58.2555	8.53154	122.449	120	-2.44898	370	52.9788	55.1778	2.19899	136.364	136.364	0	370	48.3939	50.1216	1.72769	86.9565	86.9565	0
371	51.8608	55.2998	3.43898	103.448	101.695	-1.75336	371	45.8576	46.8966	1.03898	120	127.66	7.65957	371	55.6415	57.8061	2.16453	133.333	133.333	0	371	48.546	49.8289	1.28285	89.5522	86.9565	-2.59572
372	49.648	51.4862	1.8382	103.448	103.448	1.01466e-11	372	45.1325	48.4528	3.32033	120	115.385	-4.61538	372	51.1856	54.1098	2.92413	142.857	139.535	-3.32226	372	44.2851	47.3957	3.11059	88.2353	90.9091	2.6738
373	52.0789	53.517	1.43805	105.263	103.448	-1.81488	373	51.4166	59.273	7.85638	120	120	0	373	54.6594	52.3285	-2.33088	139.535	142.857	3.32226	373	42.1861	45.3274	3.14125	84.507	88.2353	3.72825
374	54.8964	56.59	1.69364	109.091	107.143	-1.94805	374	45.974	51.1126	5.13861	122.449	122.449	-1.42109e-11	374	54.0005	56.5531	2.55262	139.535	136.364	-3.17125	374	42.775	43.4509	0.675908	86.9565	84.507	-2.44948
375	53.9929	54.3921	0.399262	103.448	105.263	1.81488	375	51.1438	49.3762	-1.76757	122.449	125	2.55102	375	50.7138	55.7645	5.05067	139.535	142.857	3.32226	375	44.9211	46.0031	1.08201	86.9565	83.3333	-3.62319
376	56.9165	58.7204	1.80389	105.263	103.448	-1.81488	376	46.9318	55.673	8.74116	117.647	117.647	0	376	51.2837	51.9255	0.64179	142.857	142.857	0	376	49.4008	45.5742	-3.82664	81.0811	84.507	3.42596
377	56.4668	57.062	0.595163	100	101.695	1.69492	377	47.9883	51.6567	3.6684	127.66	127.66	0	377	51.5332	52.7297	1.19653	146.341	142.857	-3.48432	377	47.6096	53.6072	5.99763	88.2353	83.3333	-4.90196
378	55.1832	57.8635	2.68023	100	101.695	1.69492	378	55.7875	54.0047	-1.78278	122.449	125	2.55102	378	51.9343	53.3428	1.40843	142.857	146.341	3.48432	378	51.1091	48.9404	-2.16867	86.9565	89.5522	2.59572
379	53.9824	54.0352	0.0527761	101.695	101.695	9.79128e-12	379	58.0509	54.7643	-3.28658	127.66	133.333	5.67376	379	48.2659	49.198	0.932121	136.364	139.535	3.17125	379	46.8464	51.5888	4.7424	82.1918	86.9565	4.76474
380	54.2042	55.7748	1.57054	101.695	100	-1.69492	380	59.4803	59.2761	-0.204177	127.66	133.333	5.67376	380	52.5582	54.9134	2.35526	136.364	136.364	8.78231e-12	380	47.6176	49.991	2.37349	85.7143	86.9565	1.24224
381	51.8531	54.6514	2.79827	100	103.448	3.44828	381	58.4784	61.5865	3.10812	136.364	133.333	-3.0303	381	49.6604	55.2617	5.60133	136.364	136.364	0	381	45.76	46.3536	0.593679	83.3333	78.9474	-4.38596
382	53.7589	54.8584	1.09951	100	100	-9.47864e-12	382	57.4869	59.4685	1.9816	136.364	133.333	-3.0303	382	52.7676	53.3994	0.631819	142.857	139.535	-3.32226	382	48.2085	50.1074	1.8989	92.3077	90.9091	-1.3986
383	49.3718	55.0513	5.67955	105.263	101.695	-3.56824	383	58.5723	59.4999	0.927635	130.435	133.333	2.89855	383	52.1114	53.613	1.50164	136.364	139.535	3.17125	383	46.2377	47.9312	1.69355	89.5522	90.9091	1.35685
384	48.842	50.5733	1.73123	105.263	105.263	1.05018e-11	384	58.0844	60.7736	2.68924	130.435	130.435	0	384	51.1441	52.3335	1.1894	142.857	139.535	-3.32226	384	44.0625	44.8131	0.750612	81.0811	81.0811	6.22435e-12
385	48.432	51.4321	3.00016	105.263	105.263	0	385	54.9275	57.9553	3.02777	127.66	130.435	2.77521	385	29.4817	44.9451	15.4634	139.535	142.857	3.32226	385	43.1132	46.519	3.4058	88.2353	85.7143	-2.52101
386	52.4605	52.5901	0.129529	98.3607	100	1.63934	386	53.1026	52.7836	-0.31897	125	125	0	386	55.5793	54.264	-1.3153	150	146.341	-3.65854	386	44.5157	44.2508	-0.264899	88.2353	95.2381	7.0028
387	51.8669	53.9279	2.06106	98.3607	95.2381	-3.12256	387	55.3662	55.7134	0.347266	130.435	125	-5.43478	387	58.0283	53.9093	-4.11896	150	146.341	-3.65854	387	46.4106	45.3753	-1.03533	86.9565	90.9091	3.95257
388	51.0525	55.2374	4.18492	100	101.695	1.69492	388	52.9561	55.553	2.59691	125	130.435	5.43478	388	60.2224	62.6218	2.39936	153.846	150	-3.84615	388	45.3042	45.1161	-0.188084	76.9231	71.4286	-5.49451
389	50.907	54.3697	3.46266	107.143	105.263	-1.8797	389	51.4063	51.1775	-0.228796	125	125	0	389	57.6083	59.8713	2.26295	139.535	146.341	6.80658	389	49.4632	52.5669	3.10376	86.9565	84.507	-2.44948
390	57.003	56.0091	-0.993977	105.263	103.448	-1.81488	390	52.3791	52.0505	-0.328595	130.435	127.66	-2.77521	390	57.5764	56.1156	-1.46078	142.857	139.535	-3.32226	390	43.9834	47.1627	3.17932	93.75	90.9091	-2.84091
391	52.1168	58.1452	6.02837	105.263	103.448	-1.81488	391	54.7379	56.1305	1.39265	127.66	127.66	0	391	53.9294	55.7896	1.86017	139.535	142.857	3.32226	391	49.8727	55.0069	5.13424	93.75	90.9091	-2.84091
392	52.6877	52.4351	-0.25268	103.448	105.263	1.81488	392	52.3131	55.1721	2.85902	125	125	0	392	51.2266	54.5475	3.32087	142.857	139.535	-3.32226	392	48.5275	50.2385	1.71094	85.7143	86.9565	1.24224
393	53.5905	54.7929	1.20243	100	101.695	1.69492	393	55.0871	54.2292	-0.857961	127.66	127.66	0	393	50.4138	53.0394	2.6256	139.535	142.857	3.32226	393	50.072	51.7106	1.63863	85.7143	88.2353	2.52101
394	54.3383	57.7147	3.3763	105.263	103.448	-1.81488	394	50.7073	55.3862	4.67895	127.66	130.435	2.77521	394	53.798	53.5603	-0.23773	136.364	139.535	3.17125	394	46.5191	52.7665	6.2474	85.7143	86.9565	1.24224
395	52.6512	53.223	0.571804	101.695	101.695	-9.79128e-12	395	48.6044	51.003	2.39863	125	125	0	395	52.7311	57.0093	4.27824	133.333	130.435	-2.89855	395	44.3353	46.4402	2.10488	83.3333	80	-3.33333
396	56.2475	57.5179	1.27047	103.448	103.448	0	396	54.3576	53.2228	-1.13481	125	127.66	2.65957	396	53.6228	55.1512	1.52838	142.857	139.535	-3.32226	396	44.392	50.8272	6.4352	86.9565	85.7143	-1.24224
397	57.1998	58.5254	1.32564	105.263	105.263	1.05018e-11	397	50.0995	55.3286	5.22904	127.66	125	-2.65957	397	52.56	56.2357	3.67575	139.535	142.857	3.32226	397	42.2936	48.338	6.04445	93.75	95.2381	1.4881
398	53.2032	57.0526	3.8494	109.091	107.143	-1.94805	398	55.9139	54.0634	-1.8505	127.66	125	-2.65957	398	53.7578	55.3732	1.61544	146.341	142.857	-3.48432	398	39.222	47.8681	8.64604	95.2381	92.3077	-2.9304
399	55.3934	55.0799	-0.313468	105.263	107.143	1.8797	399	54.0468	58.8879	4.84115	125	127.66	2.65957	399	57.4618	58.558	1.09618	139.535	142.857	3.32226	399	42.7763	46.7392	3.96292	100	101.695	1.69492
400	54.6292	58.9368	4.30758	105.263	105.263	1.05018e-11	400	53.1221	53.7589	0.636798	122.449	122.449	0	400	56.9339	59.4449	2.51107	139.535	136.364	-3.17125	400	46.0503	50.7684	4.71806	96.7742	98.3607	1.58646
401	55.3912	57.0367	1.64551	105.263	103.448	-1.81488	401	53.8257	56.2548	2.42904	125	125	0	401	57.3048	58.241	0.936219	136.364	139.535	3.17125	401	42.8421	45.6551	2.81306	85.7143	89.5522	3.83795
402	51.4046	57.5054	6.10077	101.695	105.263	3.56824	402	54.3358	57.2956	2.95976	127.66	127.66	0	402	58.3402	59.6276	1.28741	139.535	139.535	0	402	42.595	49.4898	6.89483	88.2353	85.7143	-2.52101
403	51.3359	52.0152	0.679299	105.263	103.448	-1.81488	403	51.932	54.9152	2.98312	120	120	0	403	54.4171	58.9597	4.54261	139.535	139.535	0	403	41.369	43.9968	2.62784	84.507	83.3333	-1.17371
404	55.0062	54.2807	-0.725514	101.695	100	-1.69492	404	54.8538	55.1137	0.259899	133.333	130.435	-2.89855	404	58.8596	58.8217	-0.0379768	136.364	133.333	-3.0303	404	40.1795	44.3997	4.22023	85.7143	90.9091	5.19481
405	54.8319	56.5672	1.73528	100	101.695	1.69492	405	53.3941	55.9595	2.56538	125	127.66	2.65957	405	55.4294	58.1294	2.7	136.364	136.364	0	405	40.0817	44.1483	4.06663	85.7143	82.1918	-3.5225
406	56.236	57.7527	1.51674	101.695	100	-1.69492	406	55.3729	54.6736	-0.699227	130.435	130.435	0	406	57.6997	57.1292	-0.570502	136.364	139.535	3.17125	406	36.5455	42.3924	5.84691	82.1918	82.1918	-6.4091e-12
407	58.5833	61.6196	3.03631	107.143	107.143	0	407	53.8291	51.2689	-2.56012	127.66	127.66	0	407	53.7238	56.5787	2.85484	142.857	142.857	0	407	44.0423	47.0724	3.03013	90.9091	86.9565	-3.95257
408	54.3159	56.224	1.90806	100	101.695	1.69492	408	52.2828	53.5333	1.25047	127.66	127.66	0	408	55.5388	56.2071	0.668345	142.857	139.535	-3.32226	408	45.1122	49.7471	4.63495	89.5522	92.3077	2.75545
409	53.6302	58.0137	4.38351	101.695	105.263	3.56824	409	54.5365	58.0315	3.49498	127.66	130.435	2.77521	409	58.8021	60.588	1.78593	139.535	136.364	-3.17125	409	48.4399	51.335	2.89511	92.3077	95.2381	2.9304
410	54.7279	56.5175	1.7896	103.448	98.3607	-5.08762	410	54.3599	56.3148	1.95487	130.435	127.66	-2.77521	410	54.4445	57.7247	3.28016	136.364	142.857	6.49351	410	49.3243	49.6469	0.322613	86.9565	86.9565	0
411	57.4334	57.7486	0.31523	98.3607	98.3607	0	411	53.2409	53.0492	-0.191701	125	127.66	2.65957	411	57.1938	56.2066	-0.987156	133.333	133.333	0	411	50.7808	53.9021	3.12129	88.2353	85.7143	-2.52101
412	51.29	58.0016	6.71158	96.7742	98.3607	1.58646	412	54.502	57.5773	3.07529	127.66	127.66	0	412	57.9643	59.5378	1.57346	142.857	136.364	-6.49351	412	47.515	54.0232	6.50817	90.9091	90.9091	-7.83018e-12
413	51.7673	55.9863	4.21895	105.263	105.263	0	413	52.1545	58.1587	6.00422	127.66	127.66	0	413	59.8177	61.7155	1.89782	146.341	150	3.65854	413	45.4527	48.7698	3.31713	85.7143	86.9565	1.24224
414	51.5129	55.8696	4.35672	98.3607	100	1.63934	414	50.1535	52.2833	2.12978	127.66	125	-2.65957	414	50.4501	53.0532	2.60307	139.535	139.535	0	414	48.2595	51.1174	2.85787	88.2353	86.9565	-1.27877
415	52.9516	51.7426	-1.20899	101.695	100	-1.69492	415	51.6175	53.5471	1.92967	125	127.66	2.65957	415	53.5214	48.3489	-5.17254	139.535	139.535	0	415	45.5054	53.2325	7.7271	88.2353	89.5522	1.31694
416	55.5472	58.8657	3.31855	103.448	100	-3.44828	416	55.028	53.8545	-1.17352	127.66	125	-2.65957	416	51.4269	57.773	6.34608	146.341	139.535	-6.80658	416	50.7405	54.6302	3.88965	88.2353	89.5522	1.31694
417	53.6578	58.3661	4.70827	98.3607	101.695	3.33426	417	55.1279	59.1051	3.97728	122.449	125	2.55102	417	54.3153	57.017	2.70171	142.857	146.341	3.48432	417	44.1233	44.5025	0.379227	81.0811	85.7143	4.6332
418	53.5036	50.6315	-2.8721	101.695	103.448	1.75336	418	55.2686	57.2887	2.02003	125	125	0	418	54.5843	55.5693	0.985017	139.535	139.535	0	418	42.0998	54.4687	12.3689	90.9091	81.0811	-9.82801
419	51.3624	56.5901	5.22767	101.695	103.448	1.75336	419	57.4212	56.4647	-0.956456	127.66	127.66	0	419	55.0828	56.6518	1.56894	142.857	142.857	0	419	42.5818	47.7968	5.21495	98.3607	98.3607	-9.166e-12
420	52.8891	55.4829	2.59385	100	101.695	1.69492	420	56.1363	58.561	2.42475	120	120	0	420	54.1051	56.3658	2.26072	142.857	142.857	-1.93552e-11	420	42.2954	47.1635	4.86809	95.2381	98.3607	3.12256
421	54.3531	56.7018	2.34862	109.091	103.448	-5.64263	421	57.6806	58.7176	1.0369	130.435	125	-5.43478	421	52.9278	54.9453	2.01745	139.535	142.857	3.32226	421	43.2281	49.1077	5.87959	96.7742	96.7742	-8.86757e-12
422	54.6137	55.8958	1.28213	101.695	101.695	9.79128e-12	422	50.3104	56.4001	6.08963	120	127.66	7.65957	422	56.0436	59.6088	3.56522	142.857	139.535	-3.32226	422	46.2543	48.8997	2.64538	85.7143	85.7143	6.94911e-12
423	54.7436	55.6485	0.904919	100	100	-9.47864e-12	423	53.5207	51.7412	-1.77942	127.66	127.66	0	423	58.8281	59.642	0.813894	142.857	142.857	0	423	46.9977	51.5987	4.60099	88.2353	89.5522	1.31694
424	54.4913	55.6821	1.1908	100	100	9.47864e-12	424	49.4141	56.5138	7.09965	127.66	125	-2.65957	424	59.1282	62.0255	2.8973	146.341	142.857	-3.48432	424	51.4281	55.1816	3.75345	89.5522	86.9565	-2.59572
425	55.0128	55.582	0.569162	101.695	101.695	-9.79128e-12	425	49.9451	49.7895	-0.155563	120	120	0	425	57.3592	58.9087	1.54953	139.535	142.857	3.32226	425	48.0804	49.923	1.84252	82.1918	90.9091	8.71731
426	49.605	55.6717	6.06677	101.695	105.263	3.56824	426	47.9416	53.1152	5.17353	127.66	125	-2.65957	426	59.308	60.4773	1.16932	139.535	139.535	0	426	46.7712	47.7499	0.978696	82.1918	83.3333	1.14155
427	51.8084	53.4218	1.61334	107.143	107.143	0	427	54.0824	53.1112	-0.971106	122.449	122.449	0	427	55.9635	57.6372	1.67374	142.857	142.857	0	427	51.6335	52.5416	0.908095	82.1918	77.9221	-4.2697
428	51.5199	54.3107	2.79075	100	98.3607	-1.63934	428	52.0135	56.9643	4.95072	122.449	125	2.55102	428	49.713	51.0683	1.35523	133.333	139.535	6.20155	428	47.8075	55.5652	7.75772	84.507	84.507	-6.76437e-12
429	49.964	54.8169	4.85289	105.263	107.143	1.8797	429	52.7997	53.4113	0.611577	125	122.449	-2.55102	429	55.9873	60.2299	4.24262	136.364	133.333	-3.0303	429	49.9638	53.1266	3.16284	84.507	84.507	-6.76437e-12
430	53.4314	54.6366	1.20519	107.143	101.695	-5.44794	430	53.8976	55.2192	1.32158	122.449	122.449	0	430	54	57.5926	3.59262	142.857	142.857	0	430	51.9188	56.1124	4.19363	84.507	84.507	6.76437e-12
431	49.1695	56.0556	6.88602	103.448	103.448	1.01466e-11	431	50.5926	55.4435	4.85091	127.66	130.435	2.77521	431	58.6881	57.804	-0.884103	139.535	139.535	0	431	53.4838	56.4905	3.00673	86.9565	88.2353	1.27877
432	53.998	52.5149	-1.48312	101.695	105.263	3.56824	432	49.6774	50.4867	0.809294	122.449	127.66	5.21059	432	54.6347	57.123	2.48829	139.535	139.535	0	432	51.9983	55.0207	3.02233	84.507	82.1918	-2.31526
433	53.9136	58.6238	4.71022	105.263	103.448	-1.81488	433	55.3946	54.4238	-0.9708	127.66	120	-7.65957	433	58.6794	59.2026	0.523278	142.857	139.535	-3.32226	433	52.2979	56.6807	4.38277	85.7143	86.9565	1.24224
434	56.2198	54.8325	-1.3873	100	103.448	3.44828	434	58.3746	57.1199	-1.25469	117.647	122.449	4.80192	434	58.6086	61.346	2.73736	136.364	136.364	0	434	48.1522	56.3956	8.24337	90.9091	92.3077	1.3986
435	55.4213	60.1251	4.7038	103.448	101.695	-1.75336	435	52.4854	53.8075	1.32203	130.435	133.333	2.89855	435	55.6161	58.9524	3.33626	146.341	146.341	2.02931e-11	435	48.2446	52.2391	3.99457	95.2381	90.9091	-4.329
436	51.7673	56.3828	4.61544	107.143	105.263	-1.8797	436	54.2384	52.3947	-1.84364	130.435	133.333	2.89855	436	58.9608	57.9198	-1.04098	146.341	150	3.65854	436	43.6861	50.9978	7.31167	90.9091	93.75	2.84091
437	54.7857	52.9244	-1.86131	101.695	103.448	1.75336	437	51.8758	58.3846	6.50876	130.435	127.66	-2.77521	437	54.9236	57.1586	2.23496	133.333	133.333	1.68257e-11	437	44.2176	48.6332	4.41566	86.9565	90.9091	3.95257
438	56.16	58.5198	2.35981	105.263	101.695	-3.56824	438	52.1216	52.5766	0.454996	125	125	0	438	56.38	57.511	1.13105	139.535	139.535	0	438	43.3829	51.8742	8.49128	92.3077	89.5522	-2.75545
439	53.3007	54.636	1.33536	100	105.263	5.26316	439	56.3248	54.9122	-1.41264	122.449	125	2.55102	439	55.7705	59.489	3.71849	142.857	139.535	-3.32226	439	43.5694	43.3218	-0.247593	80	82.1918	2.19178
440	50.8014	55.652	4.85055	98.3607	96.7742	-1.58646	440	56.2087	59.4828	3.27408	122.449	122.449	0	440	56.5637	57.6772	1.11347	139.535	142.857	3.32226	440	39.6527	51.1764	11.5237	83.3333	83.3333	0
441	48.6614	53.5257	4.86425	103.448	103.448	-1.01466e-11	441	52.5039	54.3163	1.81246	125	125	1.47935e-11	441	57.0108	57.1717	0.160848	146.341	146.341	0	441	51.0551	49.6884	-1.36662	88.2353	88.2353	0
442	50.3086	53.237	2.92836	101.695	103.448	1.75336	442	51.3726	53.8874	2.51479	127.66	125	-2.65957	442	53.7589	53.287	-0.471899	139.535	142.857	3.32226	442	49.7629	51.9612	2.19832	82.1918	84.507	2.31526
443	52.1367	55.1203	2.98358	103.448	101.695	-1.75336	443	49.6918	52.5601	2.86827	122.449	125	2.55102	443	53.0616	51.2465	-1.81508	139.535	142.857	3.32226	443	42.4263	48.1146	5.6883	76.9231	77.9221	0.999001
444	48.7363	52.9219	4.18553	98.3607	103.448	5.08762	444	51.1875	51.6308	0.443265	125	127.66	2.65957	444	53.9934	57.5232	3.52984	146.341	139.535	-6.80658	444	45.3202	47.8427	2.52252	78.9474	75.9494	-2.998
445	55.9932	57.2484	1.25519	107.143	100	-7.14286	445	49.6	51.4994	1.89938	130.435	127.66	-2.77521	445	56.3282	56.719	0.390735	142.857	150	7.14286	445	40.7061	48.3225	7.61639	84.507	84.507	0
446	56.2833	58.0453	1.76199	103.448	105.263	1.81488	446	54.4785	54.7912	0.312753	133.333	130.435	-2.89855	446	55.0351	59.8081	4.773	150	142.857	-7.14286	446	46.4337	45.9739	-0.459828	85.7143	85.7143	0
447	49.4748	49.3618	-0.113003	105.263	101.695	-3.56824	447	57.7668	59.0731	1.30628	130.435	130.435	0	447	52.4484	54.3506	1.90229	139.535	146.341	6.80658	447	44.3364	53.3215	8.98504	83.3333	84.507	1.17371
448	52.134	55.7007	3.56671	105.263	101.695	-3.56824	448	52.3504	56.5356	4.18512	125	130.435	5.43478	448	52.8642	54.2988	1.43454	142.857	139.535	-3.32226	448	46.4212	48.7381	2.31699	86.9565	85.7143	-1.24224
449	51.4086	52.9481	1.53958	103.448	105.263	1.81488	449	58.7936	59.614	0.820373	130.435	125	-5.43478	449	53.2467	56.9229	3.67625	146.341	146.341	2.02931e-11	449	47.2847	48.9123	1.62765	76.9231	78.9474	2.02429
450	48.412	53.6693	5.25725	105.263	103.448	-1.81488	450	58.8793	62.2553	3.37595	122.449	125	2.55102	450	51.2197	54.4269	3.2072	136.364	139.535	3.17125	450	45.5033	53.9789	8.47559	83.3333	82.1918	-1.14155
451	50.4358	50.9517	0.515925	105.263	107.143	1.8797	451	59.2968	62.4544	3.15759	130.435	125	-5.43478	451	52.3436	50.0979	-2.24574	146.341	146.341	0	451	40.3684	45.7183	5.34994	80	81.0811	1.08108
452	52.3675	55.7344	3.36685	101.695	101.695	9.79128e-12	452	55.3831	58.774	3.3909	122.449	125	2.55102	452	54.2253	56.8402	2.61491	139.535	136.364	-3.17125	452	41.2023	50.4946	9.29226	93.75	90.9091	-2.84091
453	50.2898	54.0675	3.77765	105.263	107.143	1.8797	453	58.6388	60.3225	1.68367	122.449	125	2.55102	453	54.873	55.5509	0.677876	142.857	146.341	3.48432	453	34.5084	43.3774	8.869	90.9091	92.3077	1.3986
454	49.1504	52.6848	3.53432	105.263	103.448	-1.81488	454	54.1219	60.0042	5.88231	125	125	0	454	52.8626	57.3572	4.49457	139.535	139.535	0	454	39.7944	41.7477	1.95331	90.9091	86.9565	-3.95257
455	51.1114	53.7916	2.68018	107.143	109.091	1.94805	455	54.4741	55.8815	1.40746	122.449	122.449	0	455	55.6972	55.2135	-0.483716	142.857	136.364	-6.49351	455	40.8964	45.355	4.45864	85.7143	90.9091	5.19481
456	54.2458	55.4446	1.19884	105.263	103.448	-1.81488	456	55.5887	57.3764	1.7877	122.449	125	2.55102	456	54.1446	56.5484	2.40379	139.535	142.857	3.32226	456	44.4098	45.6225	1.21273	80	78.9474	-1.05263
457	49.986	53.6502	3.66423	98.3607	100	1.63934	457	53.0398	57.8607	4.82094	127.66	122.449	-5.21059	457	56.5256	57.165	0.63943	139.535	142.857	3.32226	457	42.0423	52.4692	10.4269	90.9091	88.2353	-2.6738
458	47.4221	54.7263	7.30414	105.263	103.448	-1.81488	458	57.0235	57.5978	0.574216	125	127.66	2.65957	458	54.8911	57.4094	2.51825	142.857	139.535	-3.32226	458	52.5279	48.2495	-4.27832	89.5522	88.2353	-1.31694
459	53.225	50.7029	-2.52217	103.448	101.695	-1.75336	459	55.6256	60.2672	4.64161	122.449	122.449	0	459	50.483	53.4293	2.94626	139.535	139.535	0	459	53.1948	54.3811	1.18628	80	88.2353	8.23529
460	51.3063	55.1289	3.82264	101.695	103.448	1.75336	460	59.4813	59.3704	-0.110865	127.66	125	-2.65957	460	52.0796	52.4767	0.397089	139.535	139.535	0	460	49.2221	56.5681	7.34599	80	88.2353	8.23529
461	49.0605	53.398	4.33754	103.448	105.263	1.81488	461	58.231	62.3609	4.12992	122.449	125	2.55102	461	52.8057	55.3974	2.59169	139.535	139.535	0	461	52.0669	52.2296	0.162678	84.507	76.9231	-7.58397
462	49.4046	51.7739	2.36929	101.695	101.695	-9.79128e-12	462	59.0443	62.0554	3.0111	125	122.449	-2.55102	462	51.6831	55.2256	3.54246	142.857	142.857	0	462	46.4838	50.2304	3.7466	73.1707	88.2353	15.0646
463	50.0658	52.5768	2.51107	103.448	103.448	1.01466e-11	463	53.9385	50.8094	-3.12904	130.435	127.66	-2.77521	463	52.4058	51.514	-0.891828	139.535	142.857	3.32226	463	48.6911	55.3041	6.61295	85.7143	74.0741	-11.6402
464	49.044	53.6699	4.62582	98.3607	96.7742	-1.58646	464	56.7195	55.9252	-0.794355	130.435	127.66	-2.77521	464	56.56	55.717	-0.842979	142.857	139.535	-3.32226	464	49.6214	50.7666	1.14521	80	81.0811	1.08108
465	50.9919	53.0897	2.09782	100	100	9.47864e-12	465	53.7663	59.0563	5.28994	130.435	130.435	1.61151e-11	465	55.6015	57.4421	1.84054	142.857	142.857	0	465	49.6839	53.4353	3.75148	81.0811	81.0811	0
466	52.3381	54.4881	2.15001	103.448	103.448	-1.01466e-11	466	51.7755	53.907	2.13154	127.66	127.66	0	466	53.9168	55.6068	1.69	139.535	142.857	3.32226	466	44.2807	51.9429	7.6622	77.9221	82.1918	4.2697
467	49.7462	53.0423	3.29605	96.7742	98.3607	1.58646	467	53.3513	53.2249	-0.126387	125	127.66	2.65957	467	53.0137	54.524	1.51025	142.857	139.535	-3.32226	467	46.569	42.0824	-4.48658	71.4286	84.507	13.0785
468	49.4393	54.8414	5.40207	103.448	100	-3.44828	468	54.7483	59.1611	4.41277	122.449	120	-2.44898	468	53.9751	56.7259	2.75076	136.364	139.535	3.17125	468	48.5997	54.4314	5.83165	80	64.5161	-15.4839
469	53.8788	54.3781	0.499348	103.448	107.143	3.69458	469	54.5166	58.0684	3.55183	125	125	0	469	48.3634	54.5862	6.22274	146.341	142.857	-3.48432	469	46.392	51.0616	4.66963	82.1918	86.9565	4.76474
470	53.2169	57.2751	4.05822	103.448	100	-3.44828	470	55.745	56.6216	0.876503	122.449	122.449	0	470	55.5887	55.1331	-0.455623	142.857	142.857	0	470	44.7645	46.3513	1.58678	76.9231	76.9231	0
471	52.7056	57.2259	4.52037	101.695	105.263	3.56824	471	51.8736	57.3164	5.44278	122.449	122.449	0	471	56.4159	54.5584	-1.85755	142.857	142.857	0	471	44.3084	49.2023	4.89391	76.9231	75.9494	-0.97371
472	47.9616	53.8302	5.86866	103.448	103.448	1.01466e-11	472	54.184	55.4443	1.26027	127.66	127.66	0	472	54.4814	58.3784	3.89699	146.341	146.341	0	472	42.045	49.0139	6.96885	83.3333	80	-3.33333
473	55.2277	53.7108	-1.51688	105.263	109.091	3.82775	473	55.9288	59.1535	3.22467	122.449	125	2.55102	473	58.0875	59.1466	1.05908	146.341	146.341	0	473	43.3317	43.4657	0.134042	76.9231	81.0811	4.158
474	58.0511	63.6324	5.58131	111.111	101.695	-9.4162	474	55.8911	56.4252	0.534172	130.435	127.66	-2.77521	474	58.5394	60.1563	1.61697	142.857	142.857	-1.93552e-11	474	45.37	50.2938	4.92379	82.1918	77.9221	-4.2697
475	54.2108	58.1262	3.91544	101.695	100	-1.69492	475	55.8538	58.7646	2.91073	122.449	127.66	5.21059	475	57.4337	58.7311	1.2974	146.341	146.341	2.02931e-11	475	45.039	48.9491	3.91009	80	82.1918	2.19178
476	58.0941	57.275	-0.819064	101.695	100	-1.69492	476	54.8489	57.7799	2.93095	125	122.449	-2.55102	476	57.0821	58.9223	1.84027	142.857	142.857	0	476	50.9578	51.8822	0.924388	80	75.9494	-4.05063
477	53.4109	59.4118	6.00093	93.75	96.7742	3.02419	477	53.0696	57.6332	4.56366	122.449	122.449	0	477	55.1575	57.4918	2.33432	142.857	142.857	-1.93552e-11	477	46.7854	50.8594	4.07405	80	88.2353	8.23529
478	54.6073	54.8186	0.21128	98.3607	96.7742	-1.58646	478	52.531	56.1772	3.6462	125	125	0	478	53.9456	57.31	3.3644	142.857	142.857	1.93552e-11	478	45.4863	49.8803	4.39399	80	74.0741	-5.92593
479	53.9427	58.8149	4.87225	98.3607	100	1.63934	479	54.766	56.2543	1.48833	127.66	127.66	1.54472e-11	479	53.393	55.841	2.44802	142.857	142.857	0	479	44.0956	48.5863	4.49067	78.9474	80	1.05263
480	56.9622	58.5841	1.62182	100	100	9.47864e-12	480	54.3564	59.5258	5.16946	127.66	125	-2.65957	480	54.3572	54.7606	0.403436	142.857	142.857	0	480	41.7519	48.4148	6.66281	84.507	85.7143	1.20724
481	55.0117	58.6804	3.66868	98.3607	96.7742	-1.58646	481	55.3156	55.3625	0.0468997	120	122.449	2.44898	481	53.6118	54.7848	1.17302	139.535	139.535	-1.84457e-11	481	50.4233	46.1227	-4.30055	81.0811	81.0811	-6.22435e-12
482	50.0318	54.2621	4.23029	92.3077	95.2381	2.9304	482	53.1862	56.8012	3.61495	120	120	0	482	55.2116	58.308	3.09642	139.535	139.535	0	482	48.3273	53.2132	4.88593	78.9474	81.0811	2.13371
483	49.2007	54.1781	4.97748	101.695	96.7742	-4.92072	483	54.8413	58.1133	3.27204	117.647	120	2.35294	483	55.0714	54.8805	-0.1909	136.364	139.535	3.17125	483	49.9245	53.4252	3.5007	81.0811	73.1707	-7.91035
484	54.5737	55.8543	1.28062	107.143	107.143	0	484	56.502	58.7669	2.26495	125	120	-5	484	55.9092	56.8233	0.91414	142.857	139.535	-3.32226	484	45.8977	52.8696	6.97193	80	88.2353	8.23529
485	49.9111	56.0319	6.12079	101.695	103.448	1.75336	485	56.165	59.0728	2.90772	120	122.449	2.44898	485	57.4856	58.7186	1.233	139.535	139.535	0	485	48.1333	47.6003	-0.533025	72.2892	76.9231	4.63392
486	48.9211	49.7831	0.862015	100	100	-9.47864e-12	486	56.7498	58.5192	1.76935	125	125	1.47935e-11	486	58.6112	60.9143	2.30314	139.535	139.535	0	486	56.19	61.4286	5.2386	83.3333	89.5522	6.21891
487	49.6125	52.9523	3.33979	96.7742	96.7742	0	487	58.2947	62.237	3.9423	120	117.647	-2.35294	487	54.5453	57.4793	2.934	142.857	142.857	0	487	50.323	56.6804	6.35737	83.3333	89.5522	6.21891
488	44.3215	52.9778	8.65633	101.695	101.695	9.79128e-12	488	60.0288	60.9357	0.906903	125	122.449	-2.55102	488	55.0055	54.7157	-0.289791	139.535	142.857	3.32226	488	51.1318	54.2979	3.16616	83.3333	81.0811	-2.25225
489	52.351	48.8742	-3.47687	103.448	103.448	-1.01466e-11	489	56.6615	62.6419	5.98042	115.385	120	4.61538	489	56.5235	58.2491	1.72553	139.535	136.364	-3.17125	489	54.9074	56.6599	1.75243	85.7143	85.7143	0
490	51.8671	55.8046	3.93753	100	101.695	1.69492	490	57.5833	57.3668	-0.216534	122.449	122.449	-1.42109e-11	490	53.8979	58.7683	4.87034	146.341	142.857	-3.48432	490	53.3678	57.1646	3.79679	77.9221	82.1918	4.2697
491	51.6347	53.9276	2.29287	103.448	103.448	0	491	57.9654	63.0699	5.10459	127.66	122.449	-5.21059	491	50.6466	51.5735	0.926886	139.535	146.341	6.80658	491	52.2331	53.7066	1.47349	77.9221	75	-2.92208
492	53.5725	54.3671	0.794595	103.448	100	-3.44828	492	55.3175	52.5839	-2.73359	127.66	127.66	0	492	53.6025	52.8226	-0.779883	139.535	136.364	-3.17125	492	48.5271	52.8883	4.36124	76.9231	76.9231	0
493	50.9945	55.4335	4.43894	98.3607	101.695	3.33426	493	59.3459	58.696	-0.649915	127.66	127.66	0	493	50.6309	52.6974	2.06649	142.857	142.857	-1.93552e-11	493	43.7757	50.3522	6.57649	78.9474	83.3333	4.38596
494	50.352	52.2483	1.8963	101.695	100	-1.69492	494	58.2957	66.1208	7.82505	127.66	127.66	-1.54472e-11	494	56.8979	57.4928	0.594945	142.857	142.857	1.93552e-11	494	49.3968	42.8508	-6.54602	75.9494	88.2353	12.2859
495	51.6987	56.029	4.33029	100	98.3607	-1.63934	495	54.8078	58.2162	3.4084	127.66	130.435	2.77521	495	51.4585	56.3239	4.86532	136.364	136.364	0	495	45.7134	55.2211	9.50774	81.0811	67.4157	-13.6654
496	50.6028	51.9338	1.33102	100	101.695	1.69492	496	55.677	56.4188	0.741824	125	122.449	-2.55102	496	56.6566	53.772	-2.88461	142.857	142.857	0	496	45.3541	47.8112	2.45707	83.3333	85.7143	2.38095
497	56.0039	55.8089	-0.194995	103.448	101.695	-1.75336	497	50.7106	56.6655	5.95488	125	127.66	2.65957	497	59.2888	62.9169	3.62812	146.341	142.857	-3.48432	497	46.0888	50.433	4.34416	80	81.0811	1.08108
498	53.0322	58.8025	5.77024	101.695	103.448	1.75336	498	51.3098	53.7863	2.47647	125	125	0	498	54.4248	52.1229	-2.30191	150	153.846	3.84615	498	49.3728	51.2674	1.89461	80	75.9494	-4.05063
499	50.8206	52.0643	1.24367	103.448	103.448	0	499	56.3277	56.4387	0.111016	125	127.66	2.65957	499	58.7065	55.7535	-2.95298	150	153.846	3.84615	499	45.2541	50.7765	5.52247	78.9474	82.1918	3.24441
500	53.501	57.882	4.38097	100	100	0	500	51.8703	58.3323	6.46205	130.435	125	-5.43478	500	58.7174	64.0414	5.32406	146.341	142.857	-3.48432	500	46.537	52.9635	6.42647	83.3333	82.1918	-1.14155
501	49.5029	52.6206	3.11763	98.3607	98.3607	0	501	55.5035	54.8876	-0.615897	125	127.66	2.65957	501	58.3131	61.3118	2.99868	142.857	142.857	-1.93552e-11	501	51.2401	51.0472	-0.192917	76.9231	77.9221	0.999001
502	48.1561	52.5267	4.37062	101.695	100	-1.69492	502	51.7424	58.6225	6.88006	125	122.449	-2.55102	502	57.946	59.6179	1.67186	139.535	142.857	3.32226	502	47.3857	55.6263	8.24056	80	80	0
503	48.8556	51.1356	2.27996	101.695	103.448	1.75336	503	54.4636	55.9904	1.52682	125	125	0	503	58.3955	61.3492	2.95369	139.535	139.535	0	503	50.1623	52.0704	1.90809	83.3333	81.0811	-2.25225
504	48.8426	49.5708	0.728241	98.3607	100	1.63934	504	50.6709	57.215	6.54415	125	125	0	504	58.0171	58.8438	0.826636	142.857	142.857	0	504	48.4548	51.3155	2.86068	78.9474	78.9474	0
505	54.6784	55.7439	1.06552	101.695	103.448	1.75336	505	48.5985	52.0914	3.49294	120	122.449	2.44898	505	55.3023	57.2897	1.98739	142.857	142.857	-1.93552e-11	505	41.424	48.7289	7.30493	75	82.1918	7.19178
506	52.0189	52.1875	0.168593	103.448	105.263	1.81488	506	48.0581	51.3127	3.25456	130.435	127.66	-2.77521	506	55.5178	55.9497	0.431936	142.857	142.857	1.93552e-11	506	50.6858	51.1678	0.482078	82.1918	73.1707	-9.02105
507	56.0948	59.9774	3.88263	103.448	105.263	1.81488	507	48.0561	53.0435	4.98744	127.66	133.333	5.67376	507	51.4888	54.3014	2.81263	142.857	146.341	3.48432	507	47.3789	53.2658	5.88691	80	83.3333	3.33333
508	52.9389	59.9496	7.01075	105.263	107.143	1.8797	508	51.5453	53.583	2.03771	125	122.449	-2.55102	508	55.8509	56.0982	0.247309	146.341	142.857	-3.48432	508	45.2448	50.4361	5.19134	80	80	0
509	54.149	54.0071	-0.141951	100	98.3607	-1.63934	509	57.6815	54.1189	-3.56256	122.449	125	2.55102	509	57.2963	56.4246	-0.871726	139.535	142.857	3.32226	509	47.5734	49.8588	2.28544	83.3333	81.0811	-2.25225
510	49.5909	57.5334	7.94248	98.3607	98.3607	0	510	51.2286	60.8916	9.66308	127.66	125	-2.65957	510	55.4878	59.7472	4.25936	136.364	136.364	0	510	50.2014	51.3794	1.17793	75.9494	81.0811	5.13171
511	47.4234	53.0746	5.65123	98.3607	100	1.63934	511	54.4092	55.4562	1.04709	122.449	122.449	1.42109e-11	511	55.4642	57.9985	2.5343	139.535	139.535	0	511	44.1007	51.7751	7.67441	78.9474	75.9494	-2.998
512	50.4466	51.7053	1.25867	98.3607	98.3607	9.166e-12	512	57.545	58.6408	1.09576	122.449	125	2.55102	512	54.7203	56.1596	1.43934	142.857	142.857	0	512	43.4496	47.1406	3.69099	76.9231	77.9221	0.999001
513	48.07	53.9995	5.92941	96.7742	96.7742	0	513	58.9168	60.9847	2.06788	125	120	-5	513	55.8254	56.918	1.09259	139.535	139.535	0	513	49.201	47.3682	-1.83283	74.0741	75.9494	1.87529
514	44.6008	49.7448	5.14397	96.7742	98.3607	1.58646	514	58.8117	62.3919	3.58014	122.449	125	2.55102	514	57.5566	57.4469	-0.109702	142.857	142.857	0	514	42.8217	46.2019	3.38024	74.0741	85.7143	11.6402
515	46.9901	49.1032	2.1131	98.3607	96.7742	-1.58646	515	59.4987	60.6435	1.14472	122.449	125	2.55102	515	58.2954	62.6186	4.32314	139.535	139.535	-1.84457e-11	515	57.0746	52.9295	-4.14515	92.3077	90.9091	-1.3986
516	44.9017	50.5161	5.61446	98.3607	98.3607	0	516	55.3942	61.1546	5.76034	127.66	122.449	-5.21059	516	57.0042	57.5414	0.537147	142.857	139.535	-3.32226	516	55.2224	58.397	3.17458	92.3077	90.9091	-1.3986
517	51.2405	50.761	-0.479546	100	100	9.47864e-12	517	57.5447	58.364	0.819343	125	125	0	517	59.4283	60.1998	0.771555	142.857	139.535	-3.32226	517	53.8813	53.3907	-0.490631	86.9565	90.9091	3.95257
518	52.6877	55.3498	2.66211	98.3607	98.3607	-9.166e-12	518	56.7824	59.9099	3.12747	125	125	0	518	55.281	59.7981	4.51708	133.333	136.364	3.0303	518	51.7693	55.0756	3.3063	90.9091	88.2353	-2.6738
519	50.8963	55.4552	4.55888	101.695	101.695	9.79128e-12	519	55.8857	59.6749	3.78927	127.66	130.435	2.77521	519	56.6561	55.9198	-0.736369	142.857	142.857	0	519	50.518	52.4242	1.90615	88.2353	90.9091	2.6738
520	53.0337	54.887	1.85329	100	100	-9.47864e-12	520	59.1918	59.8789	0.687123	130.435	133.333	2.89855	520	54.4447	58.0762	3.63152	139.535	142.857	3.32226	520	46.0089	48.0335	2.02459	80	85.7143	5.71429
521	54.4974	58.673	4.17556	100	100	0	521	58.389	61.2457	2.85675	130.435	133.333	2.89855	521	52.2606	56.6356	4.37497	136.364	136.364	0	521	47.0895	47.0561	-0.0334177	81.0811	78.9474	-2.13371
522	51.3708	57.4292	6.05848	100	100	9.47864e-12	522	58.5538	63.0457	4.49187	127.66	127.66	0	522	53.2518	52.7577	-0.494141	139.535	136.364	-3.17125	522	45.7446	45.383	-0.361577	77.9221	75	-2.92208
523	52.1956	56.6243	4.42865	98.3607	100	1.63934	523	57.2985	60.8821	3.58356	125	127.66	2.65957	523	54.1666	55.642	1.47535	139.535	139.535	0	523	48.3741	52.9296	4.55554	95.2381	90.9091	-4.329
524	51.2129	56.6536	5.44068	101.695	100	-1.69492	524	56.5955	59.1621	2.56664	125	125	0	524	51.5762	54.8012	3.22503	139.535	142.857	3.32226	524	49.6366	48.8573	-0.77931	88.2353	98.3607	10.1254
525	48.6816	55.9213	7.23967	101.695	101.695	-9.79128e-12	525	54.3569	57.2517	2.89485	125	127.66	2.65957	525	54.5933	54.2184	-0.37488	146.341	142.857	-3.48432	525	50.9663	52.8972	1.93094	89.5522	86.9565	-2.59572
526	47.0194	51.6703	4.65084	98.3607	100	1.63934	526	52.8734	57.3736	4.50029	127.66	125	-2.65957	526	48.4423	49.7757	1.33341	139.535	139.535	0	526	49.6741	50.0577	0.383584	86.9565	83.3333	-3.62319
527	47.3361	52.643	5.30689	101.695	100	-1.69492	527	58.4815	59.2018	0.720296	127.66	127.66	0	527	46.4546	45.8663	-0.588252	139.535	139.535	0	527	45.0975	50.3928	5.2953	90.9091	92.3077	1.3986
528	53.3164	54.2537	0.937297	101.695	101.695	0	528	55.9236	59.081	3.15742	127.66	125	-2.65957	528	47.8307	51.7871	3.95634	139.535	139.535	0	528	48.435	48.3503	-0.0847375	90.9091	89.5522	-1.35685
529	54.5328	58.3329	3.80011	101.695	101.695	0	529	52.6708	56.4017	3.73087	127.66	130.435	2.77521	529	48.8757	53.7844	4.90872	139.535	139.535	-1.84457e-11	529	47.251	50.4464	3.19545	90.9091	89.5522	-1.35685
530	51.6326	55.1156	3.483	100	103.448	3.44828	530	56.0594	57.0071	0.947687	125	125	0	530	53.0928	52.1562	-0.936534	142.857	142.857	1.93552e-11	530	46.5932	47.8954	1.30221	85.7143	88.2353	2.52101
531	49.4858	53.8804	4.39457	98.3607	95.2381	-3.12256	531	54.8063	60.0147	5.20838	120	122.449	2.44898	531	55.3965	56.3076	0.911019	142.857	142.857	0	531	45.3271	50.6398	5.31264	86.9565	89.5522	2.59572
532	50.4308	53.8023	3.37148	100	101.695	1.69492	532	55.989	56.2948	0.305754	127.66	125	-2.65957	532	55.0115	58.9231	3.9116	146.341	142.857	-3.48432	532	50.0476	48.7102	-1.33737	86.9565	85.7143	-1.24224
533	52.8983	54.3526	1.45425	96.7742	100	3.22581	533	55.6972	59.2342	3.53692	127.66	122.449	-5.21059	533	55.1272	56.5354	1.40817	142.857	146.341	3.48432	533	54.4509	52.4774	-1.97349	88.2353	86.9565	-1.27877
534	54.7635	51.8895	-2.87394	105.263	105.263	0	534	52.6061	57.6331	5.02706	120	127.66	7.65957	534	55.0493	54.9769	-0.0723899	139.535	142.857	3.32226	534	51.4619	53.3016	1.83969	90.9091	92.3077	1.3986
535	51.9542	59.6018	7.64758	105.263	105.263	0	535	54.4801	56.6485	2.16841	125	120	-5	535	56.9381	58.9606	2.02247	142.857	139.535	-3.32226	535	49.5466	53.6594	4.11278	90.9091	92.3077	1.3986
536	55.713	56.6552	0.942143	107.143	107.143	0	536	53.351	57.0001	3.64907	127.66	130.435	2.77521	536	57.8302	60.6547	2.82454	142.857	142.857	-1.93552e-11	536	51.0338	51.3898	0.356052	93.75	90.9091	-2.84091
537	58.3272	61.0306	2.70338	101.695	101.695	0	537	58.0448	59.6533	1.60849	122.449	122.449	0	537	57.9222	58.9707	1.04852	142.857	142.857	1.93552e-11	537	49.0792	51.6228	2.54358	88.2353	89.5522	1.31694
538	55.4682	61.2474	5.77922	101.695	103.448	1.75336	538	53.9771	52.4505	-1.52655	130.435	127.66	-2.77521	538	55.9927	57.7578	1.76507	136.364	136.364	0	538	54.1027	52.1126	-1.99007	88.2353	89.5522	1.31694
539	53.2639	57.2072	3.94326	96.7742	96.7742	8.86757e-12	539	54.3299	54.1209	-0.209012	130.435	127.66	-2.77521	539	58.9182	62.2471	3.32884	139.535	139.535	0	539	51.6929	51.8019	0.108957	84.507	84.507	0
540	50.1192	57.374	7.25482	98.3607	98.3607	0	540	53.9673	60.1994	6.23206	127.66	130.435	2.77521	540	58.309	59.9791	1.67011	133.333	136.364	3.0303	540	53.1686	51.9495	-1.21912	86.9565	89.5522	2.59572
541	55.6143	56.6953	1.08097	100	98.3607	-1.63934	541	56.4506	58.9947	2.5441	127.66	127.66	0	541	54.8887	59.1131	4.22446	136.364	136.364	0	541	50.3166	52.5442	2.22758	85.7143	84.507	-1.20724
542	53.4581	57.8252	4.3671	101.695	105.263	3.56824	542	55.2919	58.7193	3.42742	125	125	0	542	55.834	54.0805	-1.75353	139.535	142.857	3.32226	542	51.9515	52.843	0.891549	88.2353	86.9565	-1.27877
543	56.2157	57.6173	1.40168	98.3607	96.7742	-1.58646	543	55.6594	59.5985	3.93904	127.66	125	-2.65957	543	54.1144	58.8621	4.74771	139.535	133.333	-6.20155	543	50.5744	53.3032	2.72875	90.9091	95.2381	4.329
544	53.3463	60.3663	7.01999	101.695	101.695	9.79128e-12	544	58.0297	59.8072	1.7775	125	127.66	2.65957	544	56.126	56.7046	0.578616	139.535	139.535	0	544	49.4821	51.8644	2.38226	89.5522	86.9565	-2.59572
545	52.7831	56.4354	3.65229	101.695	101.695	-9.79128e-12	545	55.338	60.1447	4.80672	127.66	127.66	0	545	52.7113	54.6401	1.92879	136.364	142.857	6.49351	545	47.9702	48.3906	0.420388	84.507	84.507	0
546	51.3	55.403	4.103	100	100	0	546	56.8046	57.7971	0.992471	127.66	127.66	0	546	51.7152	55.3422	3.62703	142.857	136.364	-6.49351	546	49.4613	50.1018	0.640428	86.9565	85.7143	-1.24224
547	56.1319	56.2824	0.15051	98.3607	98.3607	9.166e-12	547	57.1435	59.9006	2.75711	125	125	0	547	53.1347	54.391	1.25626	142.857	146.341	3.48432	547	46.5284	49.6217	3.09324	88.2353	90.9091	2.6738
548	48.4206	57.3915	8.97094	96.7742	98.3607	1.58646	548	54.6983	59.0179	4.31959	130.435	127.66	-2.77521	548	53.1486	53.5325	0.383916	142.857	142.857	0	548	43.8232	48.0959	4.27274	89.5522	86.9565	-2.59572
549	53.7195	52.7783	-0.941165	98.3607	98.3607	0	549	54.706	57.7657	3.05962	127.66	127.66	0	549	54.2248	55.8881	1.66329	139.535	139.535	0	549	48.3527	47.7335	-0.619106	85.7143	90.9091	5.19481
550	49.4627	56.7934	7.33072	98.3607	96.7742	-1.58646	550	54.7978	59.1148	4.317	122.449	127.66	5.21059	550	50.1243	53.9033	3.779	142.857	139.535	-3.32226	550	45.0593	48.7227	3.66332	84.507	86.9565	2.44948
551	51.6109	53.0834	1.47253	101.695	101.695	0	551	58.4433	58.529	0.0856566	122.449	120	-2.44898	551	50.4817	50.9134	0.431703	142.857	142.857	-1.93552e-11	551	48.3832	51.3888	3.00562	89.5522	82.1918	-7.36046
552	51.2009	57.6231	6.42216	103.448	103.448	1.01466e-11	552	57.6292	62.8599	5.23068	117.647	120	2.35294	552	46.8523	48.5884	1.73612	142.857	142.857	1.93552e-11	552	44.6972	45.8726	1.17532	84.507	98.3607	13.8536
553	51.1695	52.2951	1.12559	100	101.695	1.69492	553	53.2666	58.5391	5.27257	130.435	125	-5.43478	553	54.1388	53.5464	-0.592347	142.857	146.341	3.48432	553	48.1056	45.9339	-2.1717	84.507	80	-4.50704
554	45.6236	53.7341	8.11052	100	100	9.47864e-12	554	53.6154	54.9853	1.36987	127.66	130.435	2.77521	554	51.2143	51.7583	0.543964	146.341	146.341	0	554	46.8479	49.1605	2.31262	83.3333	78.9474	-4.38596
555	52.8782	53.9626	1.08448	103.448	100	-3.44828	555	55.5705	57.6541	2.08354	127.66	127.66	-1.54472e-11	555	50.2281	50.2236	-0.0045427	146.341	146.341	0	555	47.5733	48.7736	1.20029	83.3333	84.507	1.17371
556	51.1328	55.0837	3.95096	96.7742	98.3607	1.58646	556	55.7602	58.344	2.58385	125	125	0	556	54.7917	56.2195	1.42774	142.857	136.364	-6.49351	556	46.8867	52.2687	5.38204	100	93.75	-6.25
557	48.8402	53.0686	4.2284	96.7742	100	3.22581	557	53.9601	57.9402	3.98008	125	125	1.47935e-11	557	55.4191	59.5906	4.17153	142.857	142.857	0	557	48.275	45.4946	-2.78036	88.2353	90.9091	2.6738
558	50.0924	53.0841	2.99166	100	98.3607	-1.63934	558	51.2832	55.0984	3.81519	122.449	125	2.55102	558	54.5873	56.0415	1.45418	142.857	150	7.14286	558	45.3936	51.0818	5.6882	90.9091	89.5522	-1.35685
559	49.4893	52.2091	2.71981	101.695	100	-1.69492	559	56.3922	55.9396	-0.452602	127.66	122.449	-5.21059	559	55.2707	57.7241	2.4534	146.341	142.857	-3.48432	559	45.1441	46.6739	1.52988	88.2353	88.2353	1.47509e-11
560	52.7253	52.3699	-0.355399	96.7742	98.3607	1.58646	560	55.5252	59.9439	4.41877	122.449	122.449	0	560	56.108	56.6344	0.52641	139.535	139.535	0	560	50.4113	49.8083	-0.603028	88.2353	86.9565	-1.27877
561	51.8977	56.1051	4.20737	96.7742	96.7742	8.86757e-12	561	52.6312	56.712	4.08081	120	125	5	561	53.5874	56.4962	2.9088	139.535	142.857	3.32226	561	42.0749	47.9413	5.86638	86.9565	95.2381	8.28157
562	53.8076	57.3348	3.52722	101.695	100	-1.69492	562	56.101	55.5844	-0.51664	122.449	120	-2.44898	562	51.487	54.6818	3.1948	142.857	139.535	-3.32226	562	49.2836	48.2671	-1.01654	95.2381	88.2353	-7.0028
563	54.1369	60.5596	6.42275	101.695	100	-1.69492	563	55.9042	60.4091	4.50487	122.449	120	-2.44898	563	52.899	53.6112	0.712214	139.535	142.857	3.32226	563	48.5151	50.2647	1.74957	89.5522	92.3077	2.75545
564	52.8599	56.2767	3.41672	96.7742	100	3.22581	564	53.4375	60.1958	6.75831	127.66	127.66	0	564	50.6077	53.3528	2.74512	139.535	136.364	-3.17125	564	45.7441	50.45	4.70591	89.5522	92.3077	2.75545
565	52.0756	56.2539	4.17825	100	100	0	565	53.665	55.95	2.28496	130.435	130.435	0	565	51.0373	53.1272	2.08984	139.535	142.857	3.32226	565	46.15	46.3415	0.191489	86.9565	88.2353	1.27877
566	51.661	56.4495	4.78843	103.448	100	-3.44828	566	54.318	48.1319	-6.1861	122.449	122.449	0	566	49.7202	51.8114	2.09125	142.857	139.535	-3.32226	566	45.8875	47.689	1.8015	86.9565	86.9565	0
567	53.5436	54.8113	1.26764	100	100	0	567	51.9813	60.6572	8.67587	122.449	122.449	0	567	52.7627	52.8068	0.0441135	139.535	139.535	0	567	47.118	46.4384	-0.679627	84.507	86.9565	2.44948
568	52.8979	57.0333	4.13542	98.3607	100	1.63934	568	45.715	54.2094	8.49445	120	120	0	568	56.1143	54.8991	-1.2153	142.857	146.341	3.48432	568	49.0529	51.2023	2.14947	84.507	84.507	0
569	50.9994	53.4462	2.44675	96.7742	98.3607	1.58646	569	46.1351	47.3842	1.24906	117.647	120	2.35294	569	51.8587	57.2144	5.35578	139.535	136.364	-3.17125	569	47.4574	51.5032	4.04585	86.9565	84.507	-2.44948
570	48.7129	54.6301	5.91724	98.3607	96.7742	-1.58646	570	45.8837	51.3208	5.43708	117.647	117.647	0	570	53.7801	53.0508	-0.729255	136.364	139.535	3.17125	570	47.3846	49.2063	1.8217	88.2353	83.3333	-4.90196
571	49.1719	53.3511	4.17918	96.7742	100	3.22581	571	50.6069	51.15	0.543037	122.449	120	-2.44898	571	55.2968	59.1354	3.83853	146.341	142.857	-3.48432	571	53.239	51.5143	-1.72467	90.9091	89.5522	-1.35685
572	50.9141	55.0392	4.12511	101.695	100	-1.69492	572	50.7472	56.7708	6.02366	117.647	117.647	0	572	52.4014	56.0511	3.64969	136.364	136.364	0	572	52.1568	55.3458	3.18902	93.75	95.2381	1.4881
573	50.7901	54.884	4.09392	100	100	-9.47864e-12	573	51.3888	53.3348	1.94602	115.385	115.385	0	573	55.7451	55.9494	0.204286	139.535	142.857	3.32226	573	51.1317	52.1366	1.00488	89.5522	90.9091	1.35685
574	48.868	52.4903	3.62226	95.2381	98.3607	3.12256	574	50.4193	56.0971	5.67779	122.449	122.449	0	574	54.4519	58.5684	4.11648	136.364	133.333	-3.0303	574	48.2109	49.4342	1.22327	82.1918	90.9091	8.71731
575	51.5025	55.7264	4.22395	100	95.2381	-4.7619	575	52.1493	55.4671	3.31779	117.647	117.647	0	575	57.2265	54.0923	-3.13422	139.535	142.857	3.32226	575	44.7508	49.6711	4.92031	85.7143	82.1918	-3.5225
576	48.0207	53.048	5.02729	98.3607	101.695	3.33426	576	49.4596	55.2323	5.77274	120	120	0	576	57.6455	60.9726	3.32707	139.535	136.364	-3.17125	576	42.7606	46.1858	3.42516	85.7143	82.1918	-3.5225
577	52.4231	53.45	1.02691	96.7742	96.7742	0	577	49.549	53.1158	3.56681	120	120	0	577	49.4892	56.6734	7.18428	136.364	139.535	3.17125	577	43.7824	46.9365	3.15407	86.9565	84.507	-2.44948
578	47.5648	54.6761	7.11125	98.3607	96.7742	-1.58646	578	50.6292	57.1736	6.54439	115.385	117.647	2.26244	578	54.0902	47.6997	-6.39045	120	120	0	578	45.8822	44.7166	-1.16559	85.7143	86.9565	1.24224
579	45.0837	50.0649	4.98121	100	100	0	579	53.6566	56.146	2.48941	115.385	113.208	-2.17707	579	55.8759	57.4415	1.56561	139.535	136.364	-3.17125	579	44.7888	47.1278	2.339	86.9565	89.5522	2.59572
580	48.3689	49.4487	1.0798	98.3607	98.3607	9.166e-12	580	48.0344	58.4041	10.3697	120	117.647	-2.35294	580	55.8432	60.1627	4.31951	139.535	139.535	0	580	48.8103	46.5172	-2.2931	85.7143	84.507	-1.20724
581	43.394	50.1951	6.80111	103.448	103.448	-1.01466e-11	581	49.4945	49.349	-0.145473	120	125	5	581	54.8582	52.2282	-2.62998	139.535	142.857	3.32226	581	47.7473	50.1474	2.40007	85.7143	83.3333	-2.38095
582	49.2639	50.1433	0.879479	103.448	101.695	-1.75336	582	49.244	57.4253	8.18134	120	115.385	-4.61538	582	56.4587	55.7602	-0.698501	139.535	142.857	3.32226	582	47.0992	46.5154	-0.583751	86.9565	88.2353	1.27877
583	48.3332	54.4329	6.09973	101.695	103.448	1.75336	583	51.6492	50.8088	-0.840354	122.449	125	2.55102	583	55.2264	51.8577	-3.36869	139.535	142.857	3.32226	583	43.7099	48.2548	4.5449	89.5522	90.9091	1.35685
584	46.2481	48.7832	2.53507	103.448	105.263	1.81488	584	53.0664	56.0283	2.96194	120	120	0	584	56.589	59.5571	2.96812	142.857	139.535	-3.32226	584	45.3025	47.8824	2.57982	89.5522	89.5522	0
585	47.1931	49.85	2.65683	100	100	0	585	53.0747	59.4181	6.34341	125	127.66	2.65957	585	57.3007	68.9559	11.6552	139.535	139.535	1.84457e-11	585	42.5451	45.3288	2.78372	88.2353	85.7143	-2.52101
586	48.8658	51.1509	2.28512	96.7742	96.7742	0	586	54.6077	57.0185	2.41077	125	125	0	586	56.7273	60.9774	4.25012	133.333	136.364	3.0303	586	42.4954	44.3467	1.85121	83.3333	89.5522	6.21891
587	51.1687	57.6177	6.44897	103.448	100	-3.44828	587	48.5311	53.4179	4.88679	127.66	127.66	0	587	56.5697	58.2109	1.64114	130.435	130.435	1.61151e-11	587	46.1291	46.7869	0.657771	85.7143	85.7143	0
588	47.6503	50.6346	2.98434	98.3607	101.695	3.33426	588	47.1849	47.6032	0.418241	117.647	117.647	0	588	53.8982	58.11	4.21179	139.535	139.535	0	588	47.0008	48.5413	1.5405	88.2353	83.3333	-4.90196
589	50.8033	52.5094	1.70612	100	98.3607	-1.63934	589	51.0432	55.7729	4.72965	120	117.647	-2.35294	589	53.1561	54.3638	1.20769	139.535	139.535	-1.84457e-11	589	50.1785	51.0332	0.854702	90.9091	90.9091	-1.56604e-11
590	50.9585	53.5987	2.64027	93.75	93.75	8.32756e-12	590	46.5108	55.1727	8.66194	125	127.66	2.65957	590	56.4667	63.7921	7.32544	133.333	133.333	1.68257e-11	590	51.2708	52.4052	1.13442	88.2353	86.9565	-1.27877
591	50.3651	56.0397	5.67466	93.75	93.75	8.32756e-12	591	52.2854	49.3305	-2.95487	117.647	120	2.35294	591	55.2875	60.6343	5.34681	139.535	142.857	3.32226	591	50.0164	48.6165	-1.39994	85.7143	96.7742	11.0599
592	48.4546	54.9031	6.44853	100	100	-9.47864e-12	592	54.423	57.2566	2.83367	117.647	115.385	-2.26244	592	57.3065	58.1989	0.892438	133.333	133.333	0	592	45.3292	43.8154	-1.51386	88.2353	90.9091	2.6738
593	49.5202	52.1863	2.66614	101.695	101.695	9.79128e-12	593	57.8323	60.028	2.19569	117.647	117.647	0	593	57.71	58.4378	0.727817	125	125	0	593	43.9926	48.2192	4.22661	88.2353	90.9091	2.6738
594	51.2207	55.3583	4.13758	100	100	-9.47864e-12	594	54.3425	74.2605	19.918	125	125	-1.47935e-11	594	53.543	62.2794	8.73638	133.333	130.435	-2.89855	594	46.8906	44.8686	-2.02194	84.507	84.507	0
595	47.8191	53.8408	6.02167	98.3607	98.3607	0	595	55.6418	50.2163	-5.42551	125	125	-1.47935e-11	595	58.1327	63.9453	5.81259	130.435	130.435	0	595	44.6501	49.6514	5.00125	88.2353	86.9565	-1.27877
596	50.5371	51.2638	0.726763	93.75	96.7742	3.02419	596	55.0824	60.5803	5.49785	125	122.449	-2.55102	596	54.5047	59.7298	5.2251	125	127.66	2.65957	596	44.4524	44.6646	0.212262	88.2353	90.9091	2.6738
597	47.8264	54.0585	6.23213	95.2381	95.2381	0	597	56.416	62.6063	6.19032	125	122.449	-2.55102	597	53.7349	52.5199	-1.21499	133.333	133.333	0	597	48.6716	47.6578	-1.01383	88.2353	84.507	-3.72825
598	48.9006	51.0948	2.19419	96.7742	95.2381	-1.5361	598	51.5671	55.5954	4.02827	117.647	122.449	4.80192	598	56.7118	62.7255	6.01374	127.66	125	-2.65957	598	45.3989	48.5855	3.18657	85.7143	86.9565	1.24224
599	54.0153	56.0253	2.01	98.3607	100	1.63934	599	49.4875	53.7092	4.22164	122.449	122.449	1.42109e-11	599	51.5576	62.9556	11.398	133.333	133.333	1.68257e-11	599	42.479	44.2196	1.74066	83.3333	88.2353	4.90196
600	49.5125	54.6387	5.12615	95.2381	95.2381	-8.59757e-12	600	55.0437	56.4323	1.38857	115.385	115.385	-1.26192e-11	600	52.3048	54.5398	2.235	130.435	130.435	0	600	43.9268	44.4624	0.535521	82.1918	85.7143	3.5225
601	52.4876	54.9971	2.50942	100	96.7742	-3.22581	601	52.7419	58.3979	5.65605	117.647	115.385	-2.26244	601	54.8652	58.4868	3.62159	136.364	136.364	0	601	44.4589	46.4374	1.97846	86.9565	80	-6.95652
602	50.9776	56.8316	5.85402	98.3607	101.695	3.33426	602	54.2044	56.5295	2.3251	120	120	0	602	56.1657	60.3807	4.21502	130.435	133.333	2.89855	602	44.0306	47.3562	3.32559	89.5522	86.9565	-2.59572
603	46.047	50.3007	4.25366	95.2381	95.2381	8.59757e-12	603	54.0806	58.5684	4.48783	117.647	117.647	0	603	53.8914	57.892	4.0006	130.435	127.66	-2.77521	603	44.6668	45.5127	0.84585	85.7143	88.2353	2.52101
604	50.8507	52.7784	1.92766	101.695	100	-1.69492	604	53.7972	54.5089	0.711734	115.385	117.647	2.26244	604	52.4605	59.3853	6.92484	142.857	142.857	-1.93552e-11	604	43.7058	44.78	1.07414	85.7143	86.9565	1.24224
605	52.6528	54.3522	1.69947	92.3077	93.75	1.44231	605	53.2465	54.4445	1.19798	120	120	0	605	54.9617	59.3992	4.43745	133.333	136.364	3.0303	605	44.2515	46.9535	2.70203	89.5522	90.9091	1.35685
606	50.1192	56.5435	6.42431	98.3607	96.7742	-1.58646	606	49.3968	57.1489	7.75209	115.385	115.385	-1.26192e-11	606	53.5432	54.5689	1.02578	127.66	125	-2.65957	606	43.0049	45.5996	2.59472	88.2353	85.7143	-2.52101
607	49.3252	55.4514	6.12616	101.695	101.695	9.79128e-12	607	49.9519	52.6608	2.70888	120	120	0	607	52.1309	61.1141	8.98328	125	127.66	2.65957	607	42.5911	45.4698	2.87867	85.7143	89.5522	3.83795
608	51.7167	55.0508	3.3341	101.695	101.695	-9.79128e-12	608	51.5386	53.9773	2.43877	120	122.449	2.44898	608	52.9475	56.7732	3.82568	125	127.66	2.65957	608	45.3869	45.6036	0.216695	92.3077	88.2353	-4.0724
609	49.224	55.3652	6.14125	100	100	9.47864e-12	609	53.0669	54.8247	1.75781	122.449	120	-2.44898	609	54.4854	56.1529	1.66746	136.364	133.333	-3.0303	609	45.0902	46.3448	1.25459	88.2353	89.5522	1.31694
610	48.8196	52.0412	3.22157	96.7742	98.3607	1.58646	610	52.3943	55.8283	3.43398	117.647	117.647	0	610	53.1215	60.6183	7.49681	130.435	130.435	0	610	46.611	47.2539	0.642913	83.3333	85.7143	2.38095
611	54.044	55.4905	1.44649	100	96.7742	-3.22581	611	49.9665	54.6503	4.68379	117.647	120	2.35294	611	57.2821	65.3978	8.11569	136.364	136.364	0	611	44.4412	45.4061	0.964884	83.3333	83.3333	0
612	48.0117	55.8375	7.82574	101.695	101.695	9.79128e-12	612	51.6029	54.456	2.85317	120	115.385	-4.61538	612	56.4425	51.179	-5.26348	136.364	136.364	0	612	45.055	46.1368	1.08182	82.1918	83.3333	1.14155
613	48.9724	50.0185	1.04612	98.3607	98.3607	-9.166e-12	613	47.4425	53.3614	5.91889	125	125	0	613	57.2417	67.4112	10.1695	136.364	136.364	0	613	45.211	47.9956	2.78465	86.9565	84.507	-2.44948
614	51.8266	55.0461	3.2195	100	100	0	614	49.91	51.623	1.713	120	122.449	2.44898	614	53.9384	63.6646	9.72619	136.364	136.364	0	614	45.5599	47.2135	1.6536	88.2353	86.9565	-1.27877
615	50.8226	55.2207	4.39809	101.695	101.695	0	615	46.0023	52.1662	6.16387	125	125	0	615	54.1976	52.7523	-1.44527	133.333	133.333	1.68257e-11	615	44.9161	48.3484	3.43234	88.2353	86.9565	-1.27877
616	50.9017	52.8069	1.90521	96.7742	98.3607	1.58646	616	48.2855	50.697	2.41154	120	120	0	616	58.2918	58.9085	0.616728	139.535	139.535	0	616	43.3303	46.2209	2.8906	89.5522	88.2353	-1.31694
617	53.065	54.1228	1.05774	100	96.7742	-3.22581	617	48.3743	51.9962	3.62192	122.449	122.449	0	617	57.7079	69.0973	11.3894	136.364	133.333	-3.0303	617	41.9474	45.7234	3.77603	85.7143	89.5522	3.83795
618	51.4242	51.3923	-0.0318748	103.448	103.448	0	618	51.0303	52.4147	1.3844	115.385	115.385	1.26192e-11	618	58.3595	58.1911	-0.168458	125	130.435	5.43478	618	42.6839	45.417	2.73312	86.9565	85.7143	-1.24224
619	47.68	58.1883	10.5083	103.448	103.448	0	619	49.3675	54.8841	5.51658	111.111	113.208	2.09644	619	57.5112	60.2544	2.74314	127.66	125	-2.65957	619	45.2732	47.2892	2.01599	88.2353	86.9565	-1.27877
620	52.5922	54.4624	1.87013	101.695	103.448	1.75336	620	48.5191	52.0023	3.48322	122.449	122.449	0	620	57.824	66.5519	8.7279	125	127.66	2.65957	620	43.018	45.6538	2.63577	86.9565	84.507	-2.44948
621	48.4887	55.0519	6.56323	105.263	103.448	-1.81488	621	53.8686	54.7742	0.905633	117.647	115.385	-2.26244	621	57.8032	64.6164	6.81323	133.333	130.435	-2.89855	621	47.223	49.6146	2.39169	86.9565	84.507	-2.44948
622	44.7002	49.4934	4.79318	105.263	105.263	-1.05018e-11	622	55.4921	57.0264	1.53431	120	117.647	-2.35294	622	56.0259	57.6196	1.59379	130.435	133.333	2.89855	622	46.6321	49.0804	2.44826	90.9091	90.9091	1.56604e-11
623	46.9089	51.1766	4.26768	103.448	103.448	0	623	55.989	58.14	2.151	107.143	111.111	3.96825	623	56.4123	57.8336	1.42127	130.435	130.435	0	623	42.6055	46.7541	4.14868	88.2353	92.3077	4.0724
624	48.8605	51.9771	3.1166	105.263	103.448	-1.81488	624	47.1724	55.0203	7.84795	136.364	130.435	-5.92885	624	53.4102	63.0869	9.67675	130.435	130.435	0	624	41.6676	44.1464	2.4788	86.9565	88.2353	1.27877
625	46.0319	51.0364	5.00451	96.7742	101.695	4.92072	625	53.6864	53.3611	-0.325296	127.66	127.66	1.54472e-11	625	52.8922	58.0462	5.15406	136.364	133.333	-3.0303	625	46.7211	44.7296	-1.99156	85.7143	84.507	-1.20724
626	51.3191	54.479	3.15989	100	98.3607	-1.63934	626	51.8053	54.2084	2.40305	127.66	127.66	1.54472e-11	626	56.7218	57.294	0.572186	130.435	133.333	2.89855	626	47.7969	48.5788	0.781914	84.507	84.507	0
627	51.4741	56.4099	4.93585	98.3607	98.3607	-9.166e-12	627	53.7578	57.3035	3.54573	122.449	122.449	-1.42109e-11	627	52.6637	57.9154	5.25169	133.333	133.333	0	627	47.4338	50.4831	3.04928	86.9565	86.9565	0
628	50.3183	50.5195	0.201174	88.2353	89.5522	1.31694	628	54.2105	57.9811	3.77062	117.647	117.647	1.31166e-11	628	53.0102	58.6556	5.64547	133.333	133.333	0	628	47.6983	47.6563	-0.0419832	83.3333	84.507	1.17371
629	48.2743	55.9655	7.69119	96.7742	93.75	-3.02419	629	54.5838	59.8564	5.27265	127.66	125	-2.65957	629	55.6053	58.6111	3.00582	127.66	127.66	0	629	46.3024	49.3149	3.01256	81.0811	81.0811	0
630	46.1784	50.5763	4.39796	96.7742	100	3.22581	630	55.2919	56.899	1.60714	115.385	117.647	2.26244	630	57.2205	60.3215	3.10096	136.364	133.333	-3.0303	630	47.263	47.7422	0.479159	82.1918	82.1918	0
631	49.2291	50.9968	1.76769	98.3607	96.7742	-1.58646	631	53.6528	56.4933	2.84044	122.449	122.449	0	631	56.9288	60.7095	3.78075	136.364	136.364	0	631	45.2944	47.5128	2.2184	80	80	0
632	50.7135	56.9122	6.19869	101.695	101.695	0	632	50.6787	56.1969	5.51814	125	122.449	-2.55102	632	57.2258	58.3402	1.11443	130.435	133.333	2.89855	632	45.1903	46.6214	1.43103	80	81.0811	1.08108
633	49.1819	52.9412	3.75934	101.695	101.695	9.79128e-12	633	50.4186	53.279	2.8604	120	122.449	2.44898	633	54.9444	61.8863	6.94194	130.435	130.435	1.61151e-11	633	46.403	49.9341	3.53104	86.9565	83.3333	-3.62319
634	48.8304	51.5199	2.68943	101.695	101.695	-9.79128e-12	634	49.5583	52.9098	3.3515	122.449	122.449	0	634	52.2653	52.2548	-0.0105153	127.66	127.66	0	634	43.2041	46.5584	3.35421	83.3333	86.9565	3.62319
635	48.8735	52.7011	3.82764	98.3607	100	1.63934	635	48.1564	52.3901	4.23372	122.449	125	2.55102	635	54.815	60.9533	6.13822	127.66	127.66	0	635	48.5091	47.412	-1.09711	85.7143	83.3333	-2.38095
636	46.1888	50.9597	4.77086	100	98.3607	-1.63934	636	50.3554	54.278	3.92262	120	117.647	-2.35294	636	52.7873	58.7011	5.91382	133.333	133.333	0	636	46.9369	48.6581	1.7212	84.507	85.7143	1.20724
637	50.8475	50.3495	-0.49798	96.7742	98.3607	1.58646	637	50.7805	55.6048	4.82437	122.449	122.449	-1.42109e-11	637	53.7682	55.3086	1.54048	133.333	130.435	-2.89855	637	44.5061	46.3435	1.83735	83.3333	83.3333	-1.31593e-11
638	45.9636	53.5423	7.57877	101.695	100	-1.69492	638	46.2984	52.3959	6.09751	127.66	127.66	0	638	51.561	54.9286	3.36754	130.435	133.333	2.89855	638	42.9637	46.4173	3.45359	84.507	86.9565	2.44948
639	46.946	50.4696	3.52357	100	100	9.47864e-12	639	50.6683	49.1686	-1.49968	125	122.449	-2.55102	639	53.7454	55.3665	1.62112	130.435	127.66	-2.77521	639	43.6323	46.4846	2.85233	86.9565	85.7143	-1.24224
640	47.9248	49.8947	1.96994	100	100	-9.47864e-12	640	46.9639	53.8837	6.91973	122.449	122.449	0	640	50.4016	59.6214	9.21976	133.333	133.333	0	640	42.5942	45.2282	2.63397	86.9565	85.7143	-1.24224
641	47.6357	53.3527	5.71705	101.695	101.695	9.79128e-12	641	50.0512	51.2866	1.2354	122.449	125	2.55102	641	58.2806	56.8991	-1.38151	130.435	127.66	-2.77521	641	41.8125	44.6867	2.87418	84.507	82.1918	-2.31526
642	47.8661	49.7609	1.89486	100	101.695	1.69492	642	50.5915	53.5501	2.95856	115.385	117.647	2.26244	642	58.8431	61.1057	2.26256	130.435	127.66	-2.77521	642	42.5025	43.5328	1.03032	84.507	86.9565	2.44948
643	48.4721	53.6252	5.15303	98.3607	98.3607	9.166e-12	643	46.8723	53.3258	6.45348	120	120	0	643	57.627	67.2082	9.58121	130.435	133.333	2.89855	643	40.7949	42.7715	1.97658	82.1918	83.3333	1.14155
644	45.8953	48.4405	2.54527	95.2381	96.7742	1.5361	644	53.7705	52.9071	-0.863358	120	120	0	644	55.3411	62.3797	7.03858	136.364	133.333	-3.0303	644	43.6507	47.0657	3.41502	88.2353	85.7143	-2.52101
645	51.2171	50.7303	-0.48683	95.2381	95.2381	0	645	52.7734	58.107	5.33361	117.647	117.647	0	645	53.1564	54.855	1.69864	130.435	133.333	2.89855	645	44.4267	43.0601	-1.36668	82.1918	82.1918	0
646	55.6747	53.8818	-1.7929	113.208	111.111	-2.09644	646	51.0128	55.5507	4.53783	122.449	120	-2.44898	646	57.1923	58.4778	1.28551	136.364	136.364	0	646	43.9865	47.0177	3.03126	83.3333	82.1918	-1.14155
647	56.079	58.2114	2.1324	113.208	111.111	-2.09644	647	52.336	54.0955	1.7595	122.449	122.449	-1.42109e-11	647	54.5967	62.8948	8.29806	130.435	130.435	0	647	48.2735	46.2981	-1.97541	81.0811	82.1918	1.1107
648	53.9407	57.8033	3.86262	109.091	109.091	0	648	51.7879	56.5968	4.80895	120	122.449	2.44898	648	56.1136	57.0427	0.929081	136.364	136.364	0	648	50.3663	48.8721	-1.49412	89.5522	90.9091	1.35685
649	56.8657	56.3231	-0.542601	109.091	109.091	0	649	52.6858	55.6824	2.99657	122.449	120	-2.44898	649	52.1387	59.0335	6.89479	136.364	133.333	-3.0303	649	50.88	51.6741	0.79409	89.5522	90.9091	1.35685
650	54.5097	57.1383	2.62861	107.143	107.143	0	650	51.7592	54.3681	2.60893	113.208	115.385	2.17707	650	54.1089	56.4958	2.38689	130.435	133.333	2.89855	650	47.203	47.8251	0.622121	83.3333	88.2353	4.90196
651	54.1975	56.287	2.08942	107.143	107.143	0	651	53.1269	54.1952	1.06829	117.647	117.647	-1.31166e-11	651	53.2167	59.2125	5.99585	133.333	133.333	0	651	47.8194	48.9291	1.10967	85.7143	81.0811	-4.6332
652	54.3016	55.1879	0.886295	105.263	107.143	1.8797	652	56.9389	58.5946	1.65565	115.385	115.385	0	652	51.0899	56.4427	5.35277	130.435	130.435	0	652	46.9922	50.4811	3.48889	86.9565	88.2353	1.27877
653	53.84	55.3874	1.54732	105.263	103.448	-1.81488	653	53.9587	54.6494	0.690736	127.66	130.435	2.77521	653	53.2864	53.2622	-0.0242363	130.435	133.333	2.89855	653	45.2949	47.9495	2.65463	85.7143	86.9565	1.24224
654	52.8204	54.0922	1.27179	105.263	107.143	1.8797	654	55.8084	57.7097	1.90131	127.66	130.435	2.77521	654	55.6454	61.4035	5.75813	127.66	125	-2.65957	654	47.5729	48.0369	0.463929	89.5522	89.5522	0
655	53.7181	54.4447	0.726611	107.143	107.143	0	655	52.6362	56.7096	4.07335	125	125	0	655	55.514	59.5073	3.99328	133.333	133.333	0	655	49.8024	48.517	-1.28542	84.507	82.1918	-2.31526
656	52.3921	53.8984	1.50623	105.263	105.263	0	656	53.1318	60.9573	7.82552	120	122.449	2.44898	656	53.209	58.9183	5.70926	130.435	130.435	0	656	48.5142	50.4166	1.90236	84.507	84.507	-1.35287e-11
657	47.1224	51.9279	4.80546	107.143	109.091	1.94805	657	48.5075	54.1119	5.60436	125	122.449	-2.55102	657	53.0801	55.3862	2.30604	133.333	130.435	-2.89855	657	47.2655	49.3896	2.12409	88.2353	89.5522	1.31694
658	52.5294	49.3124	-3.21704	103.448	105.263	1.81488	658	49.6652	50.06	0.394799	117.647	117.647	0	658	53.5398	57.7206	4.18086	130.435	133.333	2.89855	658	49.1176	46.9436	-2.17404	83.3333	90.9091	7.57576
659	48.3464	53.3853	5.03888	107.143	101.695	-5.44794	659	52.0972	57.409	5.31187	117.647	120	2.35294	659	50.2668	57.5614	7.29463	133.333	136.364	3.0303	659	47.0843	49.5216	2.43726	81.0811	82.1918	1.1107
660	48.9369	50.7329	1.79604	109.091	109.091	0	660	55.2859	57.3558	2.06992	117.647	115.385	-2.26244	660	52.9236	54.1631	1.23948	127.66	127.66	-1.54472e-11	660	45.6012	46.8698	1.26854	83.3333	82.1918	-1.14155
661	47.4608	51.7119	4.2511	109.091	113.208	4.11664	661	53.0752	59.7149	6.63971	122.449	122.449	0	661	56.2622	61.1581	4.8959	130.435	127.66	-2.77521	661	43.9074	45.7355	1.82805	81.0811	80	-1.08108
662	48.5864	49.3426	0.756163	107.143	105.263	-1.8797	662	51.4651	55.2906	3.8255	122.449	125	2.55102	662	54.0252	57.606	3.58079	122.449	125	2.55102	662	47.75	46.7264	-1.0236	81.0811	81.0811	0
663	47.8376	50.7131	2.87553	113.208	113.208	0	663	50.1145	54.3451	4.23061	120	122.449	2.44898	663	52.1131	56.4363	4.32325	130.435	127.66	-2.77521	663	45.2664	48.1567	2.89035	83.3333	81.0811	-2.25225
664	43.2129	47.6616	4.44865	109.091	109.091	0	664	49.5905	52.1064	2.51592	120	117.647	-2.35294	664	55.3633	57.6827	2.31938	127.66	127.66	0	664	46.4173	45.8547	-0.562597	83.3333	89.5522	6.21891
665	46.8192	47.6514	0.832178	109.091	107.143	-1.94805	665	50.3722	53.9701	3.59784	115.385	115.385	0	665	55.0842	60.2174	5.13321	133.333	130.435	-2.89855	665	44.8059	47.2662	2.46034	81.0811	77.9221	-3.159
666	48.7181	51.86	3.14193	107.143	111.111	3.96825	666	48.5923	55.0381	6.44574	120	122.449	2.44898	666	57.6155	59.5763	1.96085	133.333	136.364	3.0303	666	44.4989	46.7444	2.24546	83.3333	76.9231	-6.41026
667	50.0181	50.7424	0.724333	107.143	107.143	0	667	46.7663	50.8174	4.05104	122.449	120	-2.44898	667	54.9872	59.2296	4.24235	130.435	133.333	2.89855	667	44.1836	43.6777	-0.505889	78.9474	90.9091	11.9617
668	57.3617	55.9173	-1.44439	109.091	105.263	-3.82775	668	47.7951	50.7706	2.97549	117.647	120	2.35294	668	58.5485	61.7486	3.20009	133.333	133.333	0	668	45.3415	47.2295	1.88807	81.0811	75.9494	-5.13171
669	55.7469	60.3195	4.57254	105.263	107.143	1.8797	669	54.4857	55.9026	1.41698	125	122.449	-2.55102	669	56.345	53.4943	-2.85066	125	125	0	669	45.0959	47.9191	2.82318	86.9565	84.507	-2.44948
670	53.7694	53.542	-0.227411	101.695	109.091	7.39599	670	48.0692	55.3499	7.28062	115.385	120	4.61538	670	56.7599	64.6159	7.85603	125	125	0	670	44.651	47.6968	3.04588	90.9091	90.9091	0
671	57.6204	58.4873	0.866847	109.091	101.695	-7.39599	671	51.3648	52.8515	1.48667	115.385	111.111	-4.2735	671	57.1427	58.8793	1.73655	136.364	136.364	0	671	46.4363	45.2058	-1.23054	85.7143	84.507	-1.20724
672	54.2181	57.4238	3.20565	105.263	109.091	3.82775	672	47.2239	54.7068	7.48281	120	117.647	-2.35294	672	55.3685	58.0647	2.69626	130.435	130.435	0	672	46.086	50.3597	4.27375	88.2353	85.7143	-2.52101
673	53.9823	54.5097	0.527454	113.208	111.111	-2.09644	673	43.7263	48.9977	5.2714	117.647	122.449	4.80192	673	57.3096	63.9111	6.60144	139.535	136.364	-3.17125	673	42.503	45.9019	3.3989	88.2353	90.9091	2.6738
674	54.7505	54.6739	-0.0765481	105.263	101.695	-3.56824	674	46.9416	47.0201	0.0785241	111.111	113.208	2.09644	674	51.8142	58.6067	6.79254	130.435	133.333	2.89855	674	43.2382	45.8218	2.58352	88.2353	89.5522	1.31694
675	49.3654	52.6406	3.27519	109.091	109.091	-2.25526e-11	675	48.0342	53.2572	5.22302	120	117.647	-2.35294	675	50.2964	51.2711	0.974726	133.333	136.364	3.0303	675	46.6004	45.1529	-1.4475	81.0811	82.1918	1.1107
676	49.8227	47.9658	-1.85691	115.385	115.385	0	676	49.9781	51.8688	1.89068	120	117.647	-2.35294	676	55.523	55.4411	-0.0819168	130.435	127.66	-2.77521
677	52.2305	56.0243	3.79379	115.385	115.385	0	677	46.7516	51.5404	4.78873	117.647	120	2.35294	677	53.238	60.1734	6.93539	133.333	133.333	0
678	51.04	54.5514	3.51138	109.091	111.111	2.0202	678	46.7378	51.1266	4.38877	120	117.647	-2.35294	678	55.7637	58.6467	2.88298	136.364	136.364	0
679	52.9561	53.7632	0.807082	111.111	109.091	-2.0202	679	44.1878	49.2417	5.05389	120	122.449	2.44898	679	55.3874	58.2741	2.88678	136.364	133.333	-3.0303
680	53.5128	55.5956	2.08279	111.111	113.208	2.09644	680	46.7257	48.9007	2.17504	117.647	117.647	-1.31166e-11	680	55.2523	57.8495	2.59717	133.333	136.364	3.0303
681	53.7776	54.8495	1.07191	111.111	113.208	2.09644	681	56.2682	57.045	0.776842	122.449	127.66	5.21059	681	55.0202	60.2542	5.23405	136.364	136.364	0
682	52.0127	55.971	3.95829	109.091	107.143	-1.94805	682	55.0696	57.1472	2.07762	122.449	127.66	5.21059	682	55.2684	58.4326	3.16418	136.364	136.364	0
683	54.9302	54.5442	-0.386	109.091	109.091	2.25526e-11	683	52.6856	62.6135	9.92792	122.449	120	-2.44898	683	56.0246	59.9996	3.97496	133.333	133.333	-1.68257e-11
684	54.8706	57.041	2.17036	100	100	0	684	47.5279	56.9441	9.41623	125	125	0	684	56.6661	60.9213	4.25522	133.333	133.333	1.68257e-11
685	54.4322	58.8962	4.464	103.448	103.448	-2.02789e-11	685	55.2895	51.9494	-3.34016	125	125	0	685	53.9917	58.1925	4.20083	136.364	133.333	-3.0303
686	53.7943	55.6717	1.87737	107.143	105.263	-1.8797	686	50.8944	58.3724	7.47807	122.449	122.449	0	686	55.7288	58.033	2.30427	133.333	136.364	3.0303
687	48.572	53.5954	5.0234	101.695	105.263	3.56824	687	56.631	51.8566	-4.77439	122.449	122.449	0	687	50.1599	54.9656	4.80565	133.333	133.333	0
688	51.1677	53.2653	2.09762	107.143	101.695	-5.44794	688	51.5206	62.5988	11.0783	113.208	115.385	2.17707	688	54.1884	57.8329	3.6445	133.333	133.333	0
689	52.7927	55.1276	2.33491	103.448	107.143	3.69458	689	49.0198	53.9217	4.90197	115.385	115.385	0	689	56.9951	60.8497	3.85462	133.333	133.333	0
690	53.8037	53.3186	-0.485156	107.143	105.263	-1.8797	690	47.2691	53.309	6.03997	117.647	117.647	0	690	56.2318	58.7997	2.56797	130.435	130.435	0
691	47.8367	53.9926	6.15588	105.263	107.143	1.8797	691	47.4561	53.5267	6.07062	122.449	120	-2.44898	691	54.7444	56.9797	2.23532	130.435	130.435	0
692	52.3963	50.7539	-1.64243	101.695	101.695	-1.95968e-11	692	48.9558	53.5154	4.55959	115.385	117.647	2.26244	692	55.5462	60.6818	5.13566	122.449	125	2.55102
693	51.0185	57.7397	6.72114	113.208	111.111	-2.09644	693	47.5599	53.028	5.46809	120	117.647	-2.35294	693	54.703	60.729	6.02592	133.333	127.66	-5.67376
694	50.3785	50.7812	0.402644	101.695	105.263	3.56824	694	51.5769	55.623	4.04611	120	120	0	694	52.1461	53.9862	1.84016	133.333	139.535	6.20155
695	50.1163	52.7072	2.59092	111.111	107.143	-3.96825	695	49.5963	53.8618	4.26552	120	122.449	2.44898	695	53.5703	55.6935	2.12314	130.435	127.66	-2.77521
696	50.836	56.4051	5.56918	105.263	107.143	1.8797	696	48.707	53.3747	4.66767	122.449	120	-2.44898	696	52.3607	60.0163	7.65561	130.435	130.435	0
697	51.7687	51.843	0.074352	109.091	111.111	2.0202	697	48.5849	57.8726	9.28772	122.449	122.449	0	697	58.1601	57.7614	-0.398752	133.333	136.364	3.0303
698	52.7575	57.3254	4.56791	105.263	103.448	-1.81488	698	51.4809	49.0693	-2.41159	120	122.449	2.44898	698	55.3031	60.6889	5.38576	130.435	127.66	-2.77521
699	55.059	56.0837	1.02466	109.091	109.091	2.25526e-11	699	49.5792	54.6894	5.11013	122.449	122.449	1.42109e-11	699	55.1469	57.6956	2.54868	127.66	130.435	2.77521
700	53.9704	58.0509	4.08056	101.695	105.263	3.56824	700	50.3247	55.8872	5.56249	115.385	117.647	2.26244	700	57.6332	61.6637	4.03044	133.333	133.333	0
701	53.658	57.3428	3.6848	107.143	103.448	-3.69458	701	47.5609	52.7676	5.20668	125	122.449	-2.55102	701	57.3334	64.0833	6.74984	130.435	130.435	0
702	54.6297	56.5822	1.9525	103.448	105.263	1.81488	702	44.9158	52.2353	7.31946	122.449	120	-2.44898	702	57.0903	56.1225	-0.967844	133.333	133.333	0
703	55.3148	58.4128	3.098	113.208	109.091	-4.11664	703	43.3922	46.6643	3.27212	115.385	120	4.61538	703	57.7264	57.939	0.212588	133.333	133.333	0
704	52.0464	49.5841	-2.46225	107.143	107.143	2.17568e-11	704	43.3708	50.1379	6.76711	117.647	115.385	-2.26244	704	51.3691	62.068	10.6989	133.333	133.333	0
705	47.8844	54.2371	6.3527	107.143	107.143	2.17568e-11	705	51.5852	52.8569	1.27162	120	120	0	705	57.7979	57.123	-0.674883	142.857	136.364	-6.49351
706	52.5698	53.5999	1.03012	103.448	105.263	1.81488	706	47.5365	54.6247	7.08822	120	122.449	2.44898	706	54.3743	56.844	2.46973	136.364	139.535	3.17125
707	50.8713	52.5855	1.71421	107.143	105.263	-1.8797	707	46.2098	49.632	3.42212	117.647	117.647	0	707	57.5909	49.0238	-8.56709	136.364	139.535	3.17125
708	51.8795	54.9526	3.07312	107.143	105.263	-1.8797	708	54.0218	57.8461	3.82438	120	117.647	-2.35294	708	55.3872	61.3578	5.97061	133.333	127.66	-5.67376
709	51.302	55.243	3.94099	107.143	109.091	1.94805	709	51.4445	49.4339	-2.01061	120	120	0	709	53.0879	65.1682	12.0802	133.333	136.364	3.0303
710	50.1189	52.9217	2.80282	105.263	107.143	1.8797	710	53.1166	57.9962	4.87962	120	120	0	710	58.1249	55.558	-2.56689	133.333	133.333	0
711	54.3797	54.4269	0.047142	107.143	103.448	-3.69458	711	49.6122	58.2773	8.66514	122.449	122.449	0	711	55.64	58.5949	2.95493	133.333	133.333	0
712	55.1838	56.4719	1.2881	107.143	109.091	1.94805	712	53.5242	52.5352	-0.988977	120	122.449	2.44898	712	51.4878	55.3426	3.85483	133.333	133.333	0
713	55.4267	58.4234	2.99666	107.143	107.143	2.17568e-11	713	53.679	57.6437	3.96471	125	120	-5	713	52.7281	54.417	1.68896	130.435	133.333	2.89855
714	53.0192	53.3779	0.358706	101.695	103.448	1.75336	714	47.915	57.6543	9.73927	120	122.449	2.44898	714	52.2124	57.5002	5.28777	125	127.66	2.65957
715	51.8281	55.9389	4.11086	107.143	105.263	-1.8797	715	52.8313	53.1674	0.336028	120	120	0	715	51.7658	55.296	3.53022	130.435	127.66	-2.77521
716	50.5272	54.0313	3.50417	107.143	107.143	0	716	48.4258	54.2061	5.78035	115.385	117.647	2.26244	716	54.3228	52.562	-1.76073	130.435	130.435	0
717	44.9458	50.0062	5.06043	100	101.695	1.69492	717	48.1893	54.4585	6.26915	125	120	-5	717	50.3106	55.5906	5.27994	133.333	133.333	0
718	48.578	51.37	2.79201	105.263	105.263	2.10036e-11	718	50.2824	51.1662	0.883851	115.385	117.647	2.26244	718	55.5316	56.2272	0.695548	136.364	133.333	-3.0303
719	52.1189	56.0912	3.97232	107.143	105.263	-1.8797	719	46.9867	53.1584	6.17172	115.385	117.647	2.26244	719	53.6729	58.6402	4.96725	139.535	139.535	0
720	55.7822	56.918	1.13587	109.091	107.143	-1.94805	720	53.0723	55.6688	2.59654	115.385	113.208	-2.17707	720	48.7463	53.6199	4.87354	130.435	133.333	2.89855
721	58.5422	58.8506	0.308401	107.143	109.091	1.94805	721	53.0323	57.4488	4.41655	122.449	122.449	-1.42109e-11	721	54.6434	55.0297	0.386255	133.333	130.435	-2.89855
722	58.8754	61.2858	2.41047	107.143	107.143	2.17568e-11	722	51.1422	54.4268	3.28459	117.647	120	2.35294	722	51.7344	58.0871	6.35272	127.66	130.435	2.77521
723	55.797	59.6719	3.87482	109.091	111.111	2.0202	723	51.4921	52.7223	1.23014	117.647	117.647	0	723	51.8151	53.3719	1.55678	122.449	125	2.55102
724	56.1795	57.669	1.48943	107.143	105.263	-1.8797	724	44.1304	52.0191	7.88872	115.385	117.647	2.26244	724	54.4178	56.4245	2.00672	127.66	125	-2.65957
725	52.0618	56.7085	4.64665	109.091	113.208	4.11664	725	47.3426	48.7094	1.3668	120	117.647	-2.35294	725	50.7285	56.4563	5.72776	127.66	127.66	0
726	50.0892	54.2416	4.15236	109.091	103.448	-5.64263	726	46.9872	51.8836	4.89642	115.385	115.385	0	726	53.7589	54.1217	0.36286	127.66	130.435	2.77521
727	50.0871	50.1469	0.0597742	103.448	107.143	3.69458	727	49.1709	52.3001	3.12915	120	117.647	-2.35294	727	52.0129	56.2503	4.23746	133.333	127.66	-5.67376
728	52.8637	53.4209	0.55722	109.091	105.263	-3.82775	728	49.7402	55.4568	5.71654	122.449	122.449	0	728	53.0345	54.2689	1.23448	136.364	139.535	3.17125
729	50.7844	54.3386	3.55421	103.448	109.091	5.64263	729	53.221	51.9193	-1.30162	125	125	0	729	52.4951	56.9499	4.45484	133.333	130.435	-2.89855
730	52.9644	54.8968	1.93241	105.263	101.695	-3.56824	730	48.7607	55.847	7.08629	117.647	120	2.35294	730	51.6195	52.9229	1.30339	130.435	136.364	5.92885
731	53.8267	54.8635	1.03678	105.263	109.091	3.82775	731	50.0543	54.5611	4.50677	120	120	0	731	50.5719	54.5141	3.94212	127.66	125	-2.65957
732	55.2011	56.2139	1.01281	107.143	105.263	-1.8797	732	52.5841	53.233	0.648891	120	117.647	-2.35294	732	49.2423	53.9181	4.67574	130.435	130.435	0
733	57.5089	59.8429	2.33409	105.263	105.263	-2.10036e-11	733	49.4428	54.2836	4.84079	117.647	120	2.35294	733	52.2811	53.0954	0.814272	125	130.435	5.43478
734	53.2887	50.9731	-2.31556	109.091	105.263	-3.82775	734	49.4501	54.4275	4.97742	120	117.647	-2.35294	734	50.9921	56.4435	5.45134	136.364	130.435	-5.92885
735	54.94	58.6881	3.74804	109.091	105.263	-3.82775	735	51.7169	52.9864	1.26948	125	127.66	2.65957	735	55.8813	57.6272	1.74597	127.66	130.435	2.77521
736	52.7772	55.0022	2.22503	105.263	109.091	3.82775	736	53.4656	57.3479	3.88224	122.449	120	-2.44898	736	49.6895	54.0182	4.32876	139.535	133.333	-6.20155
737	51.7756	55.9015	4.1259	105.263	105.263	-2.10036e-11	737	58.3708	57.0106	-1.36022	125	127.66	2.65957	737	55.588	56.9515	1.36354	133.333	133.333	0
738	55.3074	56.2249	0.917534	107.143	105.263	-1.8797	738	58.0466	56.4949	-1.55177	125	127.66	2.65957	738	54.6444	57.3796	2.73522	133.333	133.333	0
739	57.1228	61.6311	4.50832	109.091	109.091	-2.25526e-11	739	57.8725	62.8843	5.01174	130.435	127.66	-2.77521	739	51.3612	59.0579	7.69663	133.333	136.364	3.0303
740	52.1061	56.461	4.35496	109.091	113.208	4.11664	740	56.0317	58.7094	2.67767	125	127.66	2.65957	740	49.6718	53.9518	4.28001	136.364	133.333	-3.0303
741	53.66	54.057	0.397039	115.385	111.111	-4.2735	741	57.1004	55.2256	-1.87479	127.66	130.435	2.77521	741	54.0131	56.7331	2.71999	130.435	130.435	0
742	54.6042	57.8398	3.23555	113.208	111.111	-2.09644	742	58.5122	60.8915	2.37929	127.66	127.66	3.08802e-11	742	50.3428	57.8717	7.52887	133.333	133.333	0
743	54.4334	58.2679	3.83447	109.091	113.208	4.11664	743	57.1651	58.2034	1.03831	122.449	122.449	0	743	49.3875	50.8518	1.46424	130.435	130.435	0
744	59.1396	57.9789	-1.1607	115.385	111.111	-4.2735	744	52.6692	55.0142	2.34504	122.449	125	2.55102	744	55.0037	54.487	-0.516711	130.435	133.333	2.89855
745	54.6879	60.1375	5.44959	107.143	111.111	3.96825	745	54.0906	56.1977	2.10712	127.66	122.449	-5.21059	745	51.9593	60.3064	8.34711	133.333	130.435	-2.89855
746	52.8036	54.2139	1.41038	107.143	109.091	1.94805	746	52.5179	55.2692	2.75129	122.449	127.66	5.21059	746	54.1306	55.8661	1.73552	133.333	133.333	0
747	54.1888	56.8959	2.70706	109.091	107.143	-1.94805	747	54.2353	55.6743	1.43906	120	117.647	-2.35294	747	54.3479	54.6617	0.313807	127.66	127.66	0
748	54.7651	55.0295	0.264352	105.263	105.263	0	748	57.7034	58.1507	0.447313	127.66	125	-2.65957	748	51.1588	57.0777	5.91885	133.333	136.364	3.0303
749	53.1873	55.8317	2.64445	103.448	107.143	3.69458	749	58.0302	59.1953	1.16516	125	127.66	2.65957	749	50.065	56.2892	6.2242	125	125	0
750	54.1167	58.8628	4.74619	107.143	105.263	-1.8797	750	57.2181	58.6031	1.38504	125	125	2.96012e-11	750	47.4363	51.7765	4.34016	127.66	125	-2.65957
751	53.3425	55.5198	2.1773	111.111	109.091	-2.0202	751	57.2295	60.4022	3.17274	125	122.449	-2.55102	751	44.4866	48.8159	4.32932	125	127.66	2.65957
752	53.7022	56.4753	2.77308	105.263	103.448	-1.81488	752	53.7587	55.628	1.86927	127.66	133.333	5.67376	752	52.6132	52.5986	-0.0145653	130.435	130.435	0
753	52.6744	55.6934	3.01895	105.263	105.263	-2.10036e-11	753	50.0195	54.5552	4.53568	130.435	125	-5.43478	753	43.5656	52.0347	8.46908	127.66	127.66	0
754	49.391	51.8038	2.41277	103.448	109.091	5.64263	754	57.0165	56.7212	-0.295246	125	125	0	754	48.6298	46.4465	-2.18328	125	127.66	2.65957
755	53.9739	54.4268	0.452896	109.091	107.143	-1.94805	755	50.7485	55.1691	4.42056	117.647	120	2.35294	755	45.7673	52.8873	7.11992	130.435	127.66	-2.77521
756	53.3498	58.5415	5.19176	109.091	107.143	-1.94805	756	54.707	55.6299	0.922822	127.66	125	-2.65957	756	47.0591	51.8192	4.76011	122.449	122.449	0
757	52.8273	53.7194	0.892098	107.143	109.091	1.94805	757	55.0801	59.0751	3.99499	125	125	0	757	48.1894	53.2161	5.02663	130.435	127.66	-2.77521
758	55.7251	56.8487	1.12362	111.111	109.091	-2.0202	758	54.4945	55.4417	0.947278	125	125	0	758	46.5605	50.7903	4.22986	136.364	136.364	0
759	56.3456	58.5252	2.17963	103.448	105.263	1.81488	759	52.6181	54.3164	1.69831	122.449	125	2.55102	759	41.5465	47.9519	6.40538	125	133.333	8.33333
760	51.7539	55.5485	3.79456	101.695	100	-1.69492	760	53.261	54.9134	1.65241	120	120	0	760	45.6304	48.2163	2.58594	125	120	-5
761	55.0566	56.8429	1.78631	105.263	105.263	-2.10036e-11	761	52.152	55.4694	3.31741	122.449	122.449	-2.84075e-11	761	49.5592	52.0421	2.48283	125	125	0
762	55.4769	57.8134	2.33648	107.143	109.091	1.94805	762	52.7062	53.9144	1.20822	120	120	0	762	49.0443	55.4542	6.40996	130.435	130.435	0
763	58.3445	58.2406	-0.10387	109.091	105.263	-3.82775	763	53.7729	55.848	2.07513	122.449	120	-2.44898	763	53.3892	53.9283	0.539073	130.435	130.435	0
764	52.5162	48.2067	-4.30947	107.143	109.091	1.94805	764	55.4647	57.3249	1.86019	125	125	0	764	52.7633	57.2133	4.44998	125	125	0
765	47.9366	55.7664	7.82986	107.143	109.091	1.94805	765	49.7862	46.5257	-3.26054	136.364	130.435	-5.92885	765	54.6683	58.0734	3.40509	130.435	130.435	0
766	47.3733	52.0339	4.66061	109.091	107.143	-1.94805	766	51.8006	50.692	-1.10861	136.364	130.435	-5.92885	766	53.7705	55.7637	1.99318	133.333	133.333	0
767	50.9862	51.6705	0.684315	105.263	107.143	1.8797	767	52.7661	55.4635	2.69737	125	130.435	5.43478	767	50.6689	55.3747	4.70576	130.435	130.435	0
768	46.6028	52.1496	5.54682	105.263	105.263	-2.10036e-11	768	51.5925	54.2094	2.61689	125	125	0	768	51.6626	55.5993	3.93667	136.364	130.435	-5.92885
769	49.3375	52.4416	3.10412	105.263	101.695	-3.56824	769	54.6335	55.2032	0.56974	125	125	0	769	53.1149	54.0001	0.885135	139.535	142.857	3.32226
770	49.7266	53.1898	3.46313	107.143	109.091	1.94805	770	53.5639	55.8335	2.26963	122.449	125	2.55102	770	46.4584	50.5601	4.10167	130.435	133.333	2.89855
771	48.6269	51.8955	3.26851	98.3607	101.695	3.33426	771	54.9334	57.0252	2.09178	122.449	120	-2.44898	771	56.6554	55.1807	-1.4747	136.364	133.333	-3.0303
772	49.6668	56.2293	6.56253	103.448	98.3607	-5.08762	772	54.0463	58.6627	4.61646	125	122.449	-2.55102	772	51.1598	51.9609	0.801027	146.341	146.341	0
773	46.9621	52.6548	5.69262	105.263	107.143	1.8797	773	51.2181	55.3172	4.09912	120	125	5	773	49.7036	46.8323	-2.87128	146.341	146.341	0
774	55.7274	56.8389	1.11149	105.263	105.263	0	774	53.1733	54.8539	1.68061	122.449	120	-2.44898	774	54.9956	54.8173	-0.178269	142.857	139.535	-3.32226
775	53.5598	58.214	4.65422	101.695	105.263	3.56824	775	53.0145	56.4301	3.41561	122.449	122.449	0	775	53.0492	54.791	1.74173	146.341	150	3.65854
776	52.6482	56.5299	3.88175	105.263	101.695	-3.56824	776	53.6929	55.2602	1.56729	117.647	120	2.35294	776	55.9553	56.2484	0.293087	139.535	136.364	-3.17125
777	54.7747	59.5929	4.81817	101.695	101.695	1.95968e-11	777	54.8699	58.6343	3.76436	122.449	117.647	-4.80192	777	56.9954	55.7462	-1.24918	139.535	142.857	3.32226
778	51.7474	56.3351	4.58769	105.263	107.143	1.8797	778	55.0958	57.2038	2.108	120	122.449	2.44898	778	55.7381	55.3267	-0.411439	136.364	139.535	3.17125
779	54.4435	54.8859	0.442376	109.091	107.143	-1.94805	779	54.5571	58.0001	3.44292	122.449	120	-2.44898	779	54.1922	55.5988	1.40667	146.341	139.535	-6.80658
780	54.1536	58.5349	4.38127	105.263	105.263	0	780	53.9462	56.634	2.68774	122.449	122.449	0	780	52.3787	56.9197	4.54096	130.435	136.364	5.92885
781	52.1614	55.045	2.88367	107.143	109.091	1.94805	781	54.1571	57.4156	3.25848	120	120	0	781	58.1918	55.8671	-2.32466	142.857	136.364	-6.49351
782	51.9784	54.4585	2.48003	107.143	103.448	-3.69458	782	52.5569	57.9545	5.39764	122.449	125	2.55102	782	57.1386	57.8076	0.668969	133.333	133.333	0
783	54.1678	55.4438	1.27601	111.111	111.111	0	783	50.0032	53.9449	3.94172	122.449	120	-2.44898	783	56.0994	58.2939	2.19457	139.535	139.535	0
784	57.1362	58.2854	1.14924	105.263	107.143	1.8797	784	51.6037	53.7732	2.16948	120	122.449	2.44898	784	54.0475	53.4	-0.647453	139.535	142.857	3.32226
785	54.7797	56.7565	1.9768	101.695	105.263	3.56824	785	51.5367	54.9084	3.37166	117.647	117.647	0	785	52.895	54.0641	1.16908	142.857	142.857	0
786	54.574	56.7987	2.22476	103.448	101.695	-1.75336	786	51.8096	54.6627	2.85315	117.647	120	2.35294	786	53.6417	53.0211	-0.620577	139.535	139.535	0
787	52.7328	58.918	6.18521	107.143	107.143	-2.17568e-11	787	53.2474	54.8431	1.5957	120	117.647	-2.35294	787	53.7354	56.5575	2.82209	142.857	139.535	-3.32226
788	52.884	54.3177	1.43375	113.208	109.091	-4.11664	788	54.6344	58.6765	4.04212	120	120	0	788	52.0048	51.4269	-0.577881	136.364	136.364	0
789	54.0812	55.6473	1.56609	107.143	113.208	6.06469	789	54.7111	57.2423	2.53122	115.385	117.647	2.26244	789	56.5336	53.7089	-2.82474	139.535	139.535	0
790	53.5497	58.2581	4.7084	107.143	103.448	-3.69458	790	54.4481	58.1971	3.74894	122.449	120	-2.44898	790	52.8285	53.8683	1.03981	139.535	139.535	0
791	52.8571	54.6943	1.83717	105.263	105.263	2.10036e-11	791	52.9473	56.5526	3.60537	120	117.647	-2.35294	791	53.8509	52.8964	-0.954457	139.535	142.857	3.32226
792	54.2238	58.4011	4.1773	107.143	105.263	-1.8797	792	55.6521	56.0125	0.36038	117.647	120	2.35294	792	52.1141	53.4535	1.33938	142.857	139.535	-3.32226
793	50.759	49.0298	-1.72917	113.208	111.111	-2.09644	793	52.1251	47.252	-4.87312	127.66	122.449	-5.21059	793	50.2739	49.3339	-0.940017	136.364	146.341	9.97783
794	52.0949	57.5146	5.41964	113.208	111.111	-2.09644	794	50.9575	53.9162	2.95872	127.66	122.449	-5.21059	794	54.7944	54.6593	-0.135077	142.857	133.333	-9.52381
795	51.8745	56.7128	4.83836	111.111	115.385	4.2735	795	52.2954	55.7842	3.48877	125	125	0	795	50.2645	52.9495	2.68505	136.364	142.857	6.49351
796	50.098	54.1741	4.07616	111.111	111.111	2.34053e-11	796	54.623	56.7841	2.16109	122.449	125	2.55102	796	51.0176	49.988	-1.02965	139.535	133.333	-6.20155
797	51.2558	52.8575	1.60169	107.143	103.448	-3.69458	797	54.8402	54.5462	-0.294073	125	127.66	2.65957	797	50.7095	52.5357	1.82615	136.364	139.535	3.17125
798	55.0593	56.9062	1.84689	111.111	109.091	-2.0202	798	58.1103	59.0732	0.96287	125	122.449	-2.55102	798	51.1515	52.2013	1.0498	139.535	139.535	0
799	52.5891	57.2531	4.66406	107.143	113.208	6.06469	799	60.1428	64.2349	4.09202	122.449	122.449	0	799	43.9043	49.1321	5.22776	146.341	142.857	-3.48432
800	55.5931	57.7881	2.19501	109.091	105.263	-3.82775	800	56.1432	62.1541	6.01093	125	125	2.96012e-11	800	52.5894	50.6656	-1.9238	139.535	142.857	3.32226
801	51.119	58.1913	7.07226	109.091	111.111	2.0202	801	57.6612	57.4196	-0.241582	127.66	125	-2.65957	801	52.4602	50.8338	-1.62635	139.535	142.857	3.32226
802	50.959	51.6735	0.714495	105.263	107.143	1.8797	802	57.0988	57.7292	0.630453	120	127.66	7.65957	802	51.2417	56.4559	5.2142	139.535	136.364	-3.17125
803	54.0529	57.1742	3.12137	107.143	107.143	2.17568e-11	803	56.1418	59.7098	3.56794	125	117.647	-7.35294	803	51.9153	55.0734	3.15806	136.364	139.535	3.17125
804	51.8673	54.5166	2.64931	105.263	105.263	-2.10036e-11	804	57.5407	58.4955	0.9548	120	122.449	2.44898	804	51.7316	52.339	0.607388	139.535	136.364	-3.17125
805	50.1525	51.4779	1.3254	109.091	107.143	-1.94805	805	52.4339	58.1227	5.68885	125	122.449	-2.55102	805	54.2962	55.3486	1.05241	133.333	133.333	0
806	49.23	53.8786	4.64854	109.091	107.143	-1.94805	806	57.1223	56.889	-0.233345	122.449	125	2.55102	806	54.2554	54.8981	0.642735	136.364	139.535	3.17125
807	51.6951	53.2878	1.59272	107.143	111.111	3.96825	807	57.2549	59.9121	2.65721	122.449	122.449	0	807	54.561	59.7271	5.1661	133.333	133.333	0
808	52.6514	57.1566	4.50523	111.111	109.091	-2.0202	808	56.0339	58.9931	2.95919	125	122.449	-2.55102	808	52.0454	52.1558	0.110374	142.857	146.341	3.48432
809	51.1986	52.705	1.50641	109.091	111.111	2.0202	809	54.4211	56.9816	2.56042	122.449	125	2.55102	809	56.9357	56.0895	-0.846199	139.535	133.333	-6.20155
810	51.1093	55.5596	4.45036	105.263	103.448	-1.81488	810	55.8228	59.8416	4.01881	125	122.449	-2.55102	810	55.7241	56.9467	1.22254	136.364	139.535	3.17125
811	51.5642	54.1269	2.56274	107.143	109.091	1.94805	811	53.1734	58.7267	5.55335	117.647	117.647	0	811	56.9107	60.6234	3.71267	142.857	139.535	-3.32226
812	52.8366	55.6748	2.8382	109.091	107.143	-1.94805	812	53.7943	57.1524	3.35811	120	125	5	812	57.8486	58.2762	0.427549	139.535	139.535	0
813	51.0131	55.4952	4.4821	107.143	107.143	-2.17568e-11	813	51.6688	58.2155	6.54675	122.449	120	-2.44898	813	58.8619	60.9049	2.04306	139.535	136.364	-3.17125
814	50.8116	52.733	1.92136	103.448	107.143	3.69458	814	56.7223	56.4061	-0.316233	117.647	117.647	0	814	58.6242	59.6319	1.00761	142.857	146.341	3.48432
815	51.7069	55.8044	4.09749	103.448	101.695	-1.75336	815	54.0274	57.0356	3.00816	115.385	117.647	2.26244	815	57.2792	56.707	-0.572216	139.535	142.857	3.32226
816	54.9586	58.7031	3.74454	103.448	101.695	-1.75336	816	54.6939	58.5386	3.84467	122.449	120	-2.44898	816	56.0719	58.3043	2.23239	146.341	142.857	-3.48432
817	53.5003	57.2191	3.71878	107.143	107.143	2.17568e-11	817	54.7327	56.3125	1.57985	122.449	122.449	0	817	53.4419	56.6477	3.20583	139.535	139.535	-3.68914e-11
818	54.3938	57.9796	3.58581	103.448	107.143	3.69458	818	56.2338	61.3958	5.162	127.66	125	-2.65957	818	53.8244	56.4676	2.64313	136.364	139.535	3.17125
819	55.4123	60.7481	5.33578	105.263	101.695	-3.56824	819	56.0304	59.4696	3.43919	117.647	122.449	4.80192	819	55.124	54.9045	-0.219509	142.857	139.535	-3.32226
820	53.8096	57.5025	3.69289	101.695	103.448	1.75336	820	60.5334	61.1209	0.587569	125	117.647	-7.35294	820	54.026	55.4597	1.43364	142.857	139.535	-3.32226
821	56.9687	61.3167	4.34803	111.111	107.143	-3.96825	821	55.0059	54.4515	-0.554387	125	125	2.96012e-11	821	55.8721	55.64	-0.232105	139.535	142.857	3.32226
822	51.1617	52.1308	0.969132	111.111	107.143	-3.96825	822	56.47	57.311	0.84098	125	125	2.96012e-11	822	55.2104	56.8358	1.62542	139.535	142.857	3.32226
823	50.2243	59.0242	8.79991	111.111	107.143	-3.96825	823	57.7472	61.6377	3.8905	125	122.449	-2.55102	823	56.3198	57.7657	1.44593	142.857	139.535	-3.32226
824	49.9552	53.4818	3.52658	109.091	113.208	4.11664	824	57.6249	60.5424	2.91747	122.449	127.66	5.21059	824	50.999	53.1688	2.16978	139.535	139.535	-3.68914e-11
825	50.6884	52.9647	2.27626	109.091	107.143	-1.94805	825	58.0193	59.1649	1.14558	127.66	125	-2.65957	825	52.3132	51.2839	-1.02931	142.857	142.857	3.86819e-11
826	51.7193	55.1719	3.45255	107.143	105.263	-1.8797	826	57.1739	56.991	-0.182941	117.647	120	2.35294	826	59.3766	57.7981	-1.57842	136.364	139.535	3.17125
827	53.4177	55.7046	2.28693	103.448	109.091	5.64263	827	54.984	60.3247	5.34069	127.66	125	-2.65957	827	57.5534	61.2712	3.71773	142.857	139.535	-3.32226
828	52.9838	57.9873	5.0035	109.091	105.263	-3.82775	828	58.1238	57.8637	-0.260083	120	125	5	828	54.634	52.5509	-2.08313	142.857	142.857	0
829	57.9179	59.2464	1.32856	109.091	107.143	-1.94805	829	58.4149	60.9478	2.53289	122.449	120	-2.44898	829	53.2016	53.7045	0.502851	142.857	142.857	0
830	56.5897	59.8494	3.25972	109.091	111.111	2.0202	830	56.5425	61.2098	4.66732	125	125	2.96012e-11	830	51.2807	54.7505	3.4698	139.535	139.535	3.68914e-11
831	51.3162	55.7693	4.45313	109.091	109.091	2.25526e-11	831	55.7767	59.206	3.42926	120	117.647	-2.35294	831	51.5982	53.7031	2.10484	146.341	146.341	-4.05862e-11
832	53.9566	56.7733	2.81672	107.143	107.143	-2.17568e-11	832	56.1599	58.8257	2.66576	125	125	2.96012e-11	832	50.3237	51.1156	0.791919	133.333	136.364	3.0303
							833	56.566	58.8681	2.30203	122.449	122.449	0	833	53.6688	51.9419	-1.72696	139.535	139.535	-3.68914e-11
							834	55.9603	59.9686	4.00837	120	122.449	2.44898	834	49.9489	53.5151	3.56617	139.535	139.535	3.68914e-11
							835	55.3517	57.6407	2.28899	122.449	120	-2.44898	835	50.675	52.9969	2.32192	136.364	133.333	-3.0303
							836	55.1397	57.1411	2.00139	125	127.66	2.65957	836	51.281	50.0349	-1.24611	136.364	139.535	3.17125
							837	55.858	59.7325	3.87452	122.449	120	-2.44898	837	51.9913	53.8943	1.90299	142.857	139.535	-3.32226
							838	58.2132	59.219	1.00577	120	122.449	2.44898	838	54.7713	55.7671	0.995844	133.333	133.333	3.36797e-11
							839	56.7177	60.2995	3.58183	122.449	122.449	0	839	53.1346	55.6704	2.53585	136.364	139.535	3.17125
							840	59.6684	61.015	1.3466	120	120	0	840	54.6409	54.5239	-0.117019	139.535	139.535	3.68914e-11
							841	54.4808	60.3866	5.90586	125	125	0	841	49.4519	52.4191	2.96727	133.333	133.333	-3.36797e-11
							842	53.4962	56.4298	2.93365	122.449	122.449	0	842	53.4148	53.7061	0.29125	133.333	133.333	3.36797e-11
							843	57.7054	58.0513	0.345873	115.385	120	4.61538	843	52.2084	53.9596	1.7512	136.364	136.364	-3.52145e-11
							844	58.3867	61.6618	3.27511	117.647	113.208	-4.43951	844	55.216	57.2393	2.02322	142.857	139.535	-3.32226
							845	55.92	59.6176	3.69762	117.647	117.647	0	845	52.9998	56.5616	3.56179	127.66	130.435	2.77521
							846	57.35	57.4704	0.120365	117.647	120	2.35294	846	53.676	54.4459	0.769884	136.364	136.364	3.52145e-11
							847	56.8383	60.7869	3.94854	117.647	115.385	-2.26244	847	53.5605	55.6468	2.08622	136.364	133.333	-3.0303
							848	58.6796	62.2098	3.53018	130.435	127.66	-2.77521	848	54.9696	55.7412	0.771627	136.364	139.535	3.17125
							849	52.8407	50.4696	-2.37112	133.333	133.333	3.36797e-11	849	50.5873	55.9298	5.34256	136.364	136.364	3.52145e-11
							850	56.8786	58.6996	1.82096	133.333	133.333	3.36797e-11	850	54.6466	51.6943	-2.95233	139.535	136.364	-3.17125
							851	54.7138	59.2899	4.57608	130.435	133.333	2.89855	851	54.1704	56.2346	2.06423	139.535	139.535	0
							852	56.5689	58.2864	1.71742	130.435	125	-5.43478	852	53.8225	54.8831	1.06054	139.535	139.535	3.68914e-11
							853	58.9198	58.9413	0.0214621	125	127.66	2.65957	853	49.7044	52.2173	2.51289	136.364	139.535	3.17125
							854	55.6433	60.1805	4.5372	125	125	0	854	55.9507	54.3998	-1.55098	139.535	136.364	-3.17125
							855	56.6235	57.03	0.406488	130.435	130.435	-3.22302e-11	855	57.937	59.527	1.59004	142.857	142.857	-3.86819e-11
							856	54.5048	56.8198	2.31498	127.66	130.435	2.77521	856	53.7573	50.1151	-3.64216	139.535	139.535	-3.68914e-11
							857	54.869	54.5448	-0.324237	127.66	127.66	3.08802e-11	857	51.4587	52.5664	1.10771	139.535	139.535	-3.68914e-11
							858	54.8	57.7535	2.95355	127.66	125	-2.65957	858	52.2027	53.7787	1.57595	142.857	142.857	0
							859	56.0756	58.4912	2.41561	127.66	125	-2.65957	859	56.2439	59.1663	2.92246	136.364	136.364	0
							860	55.4829	58.4891	3.00611	127.66	130.435	2.77521	860	54.9822	57.7333	2.75108	142.857	146.341	3.48432
							861	53.2482	58.6116	5.36334	125	125	0	861	52.5817	55.2553	2.67361	139.535	136.364	-3.17125
							862	57.2575	56.5367	-0.720774	125	125	2.96012e-11	862	55.5778	54.7342	-0.843595	136.364	139.535	3.17125
							863	56.9462	62.2896	5.3434	120	122.449	2.44898	863	56.9171	59.2191	2.30198	139.535	133.333	-6.20155
							864	57.2007	56.758	-0.44275	125	125	0	864	52.6668	54.7734	2.10657	133.333	139.535	6.20155
							865	57.3124	59.7003	2.38792	122.449	120	-2.44898	865	51.9363	53.4395	1.50322	136.364	136.364	3.52145e-11
							866	58.16	62.3111	4.15108	125	125	-2.96012e-11	866	53.3287	53.9969	0.668287	136.364	133.333	-3.0303
							867	57.4997	60.1616	2.66192	122.449	125	2.55102	867	55.9685	57.2886	1.32016	133.333	133.333	0
							868	57.0037	58.3372	1.33351	125	122.449	-2.55102	868	52.3133	56.1481	3.83476	136.364	136.364	0
							869	56.0389	59.3432	3.30428	125	127.66	2.65957	869	51.6211	53.0187	1.39764	139.535	139.535	3.68914e-11
							870	56.5914	59.1383	2.54694	125	122.449	-2.55102	870	51.0987	53.5941	2.49546	133.333	136.364	3.0303
							871	57.7289	58.7819	1.05302	125	125	0	871	54.3248	56.5592	2.23436	139.535	136.364	-3.17125
							872	54.1364	60.9716	6.83519	120	120	0	872	53.8353	56.4812	2.64594	136.364	136.364	0
							873	55.325	57.0351	1.71014	130.435	133.333	2.89855	873	53.6488	55.1274	1.47867	133.333	133.333	0
							874	57.1262	58.9047	1.7785	122.449	122.449	0	874	56.6044	56.5362	-0.0682051	133.333	136.364	3.0303
							875	59.981	60.2676	0.286678	122.449	120	-2.44898	875	54.7604	58.6362	3.87576	133.333	130.435	-2.89855
							876	59.2825	64.7915	5.50903	133.333	130.435	-2.89855	876	56.9639	56.4431	-0.520782	133.333	136.364	3.0303
							877	56.419	55.7914	-0.627611	125	130.435	5.43478	877	53.6114	57.4977	3.88634	142.857	139.535	-3.32226
							878	55.2128	55.301	0.0881809	125	130.435	5.43478	878	50.4418	52.5669	2.12502	136.364	139.535	3.17125
							879	57.6712	62.334	4.66284	130.435	122.449	-7.9858	879	56.1016	55.6497	-0.451837	139.535	136.364	-3.17125
							880	57.3715	59.8773	2.50582	127.66	133.333	5.67376	880	57.7503	59.2567	1.50641	139.535	142.857	3.32226
							881	56.5451	58.1421	1.59704	127.66	125	-2.65957	881	58.6301	59.5989	0.968809	139.535	139.535	-3.68914e-11
							882	56.107	57.4131	1.30617	130.435	130.435	3.22302e-11	882	58.1938	58.9516	0.75774	139.535	139.535	3.68914e-11
							883	58.7464	61.411	2.66456	125	125	0	883	59.3298	62.2129	2.88314	142.857	139.535	-3.32226
							884	57.2131	60.9101	3.69704	125	122.449	-2.55102	884	54.9414	53.5241	-1.41726	136.364	136.364	0
							885	57.3444	58.7096	1.36517	122.449	127.66	5.21059	885	54.9204	53.8951	-1.02529	136.364	136.364	0
							886	55.7795	58.8401	3.06064	125	125	0	886	56.0237	58.471	2.44726	136.364	136.364	0
							887	55.8413	56.7849	0.943605	122.449	122.449	2.84075e-11	887	54.1192	60.2163	6.09717	133.333	136.364	3.0303
							888	52.7695	54.8037	2.03416	122.449	125	2.55102	888	54.0745	54.2345	0.159939	139.535	139.535	0
							889	55.0858	56.0083	0.92245	127.66	125	-2.65957	889	58.3443	56.6152	-1.72913	136.364	136.364	0
							890	51.8478	55.8297	3.98192	122.449	125	2.55102	890	55.3006	60.4739	5.17324	136.364	133.333	-3.0303
							891	53.5739	54.4606	0.886724	125	122.449	-2.55102	891	53.2543	55.9275	2.67319	136.364	139.535	3.17125
							892	55.4724	55.7248	0.252369	122.449	122.449	0	892	56.68	56.4256	-0.254403	139.535	136.364	-3.17125
							893	54.7908	58.477	3.68613	122.449	120	-2.44898	893	58.6727	60.7335	2.06079	136.364	139.535	3.17125
							894	57.9797	56.6224	-1.35727	120	120	0	894	55.1255	59.0368	3.91135	136.364	136.364	3.52145e-11
							895	54.1751	60.2808	6.10568	122.449	125	2.55102	895	55.1844	55.7523	0.567901	139.535	136.364	-3.17125
							896	54.0071	54.5974	0.590299	125	125	0	896	54.2677	57.752	3.48428	133.333	136.364	3.0303
							897	57.405	58.2341	0.829107	122.449	122.449	2.84075e-11	897	53.4835	54.9459	1.46236	142.857	142.857	0
							898	55.9884	58.501	2.51258	117.647	120	2.35294	898	53.1784	53.9822	0.803707	133.333	136.364	3.0303
							899	53.5735	56.7708	3.19728	122.449	120	-2.44898	899	54.7981	56.3926	1.59443	136.364	133.333	-3.0303
							900	58.6432	59.5093	0.866006	125	120	-5	900	54.2152	55.4376	1.22236	139.535	136.364	-3.17125
							901	57.5465	61.8528	4.30628	120	122.449	2.44898	901	55.9708	58.5591	2.58828	133.333	136.364	3.0303
							902	56.7072	57.934	1.22684	122.449	125	2.55102	902	55.4676	56.4003	0.932678	142.857	139.535	-3.32226
							903	54.5675	58.2842	3.71668	120	120	0	903	54.0283	57.539	3.51073	136.364	139.535	3.17125
							904	58.3466	61.7668	3.42019	125	122.449	-2.55102	904	55.2657	55.0945	-0.17129	139.535	139.535	-3.68914e-11
							905	54.9817	52.9772	-2.00448	122.449	122.449	0	905	54.2743	55.7069	1.43258	139.535	136.364	-3.17125
							906	51.66	55.237	3.57702	122.449	122.449	0	906	52.9229	55.6075	2.68468	136.364	139.535	3.17125
							907	53.2165	55.6471	2.43061	127.66	125	-2.65957	907	52.5449	54.82	2.27506	133.333	136.364	3.0303
							908	53.3979	56.0137	2.61582	122.449	125	2.55102	908	50.9505	51.8463	0.895853	142.857	136.364	-6.49351
							909	53.9839	57.4337	3.44978	120	120	0	909	45.5031	48.844	3.34095	136.364	139.535	3.17125
							910	53.0918	55.0308	1.93904	122.449	120	-2.44898	910	50.6464	50.8188	0.172414	139.535	139.535	-3.68914e-11
							911	52.1845	56.4484	4.26398	122.449	122.449	2.84075e-11	911	53.2595	54.7978	1.53837	136.364	136.364	3.52145e-11
							912	52.6096	55.2906	2.68102	117.647	122.449	4.80192	912	48.8497	51.4389	2.58912	142.857	142.857	3.86819e-11
							913	54.4093	56.0396	1.63029	120	117.647	-2.35294	913	50.7117	46.784	-3.9277	142.857	142.857	3.86819e-11
							914	56.2005	58.4586	2.25812	115.385	115.385	-2.52243e-11	914	56.2729	58.0247	1.75183	139.535	142.857	3.32226
							915	50.4121	57.1851	6.77304	115.385	117.647	2.26244	915	53.861	58.288	4.42693	146.341	142.857	-3.48432
							916	54.9563	55.1685	0.212131	122.449	120	-2.44898	916	56.7071	55.68	-1.02714	139.535	139.535	3.68914e-11
														917	57.0141	58.505	1.4909	139.535	139.535	-3.68914e-11
														918	57.876	60.3801	2.50411	142.857	142.857	3.86819e-11
														919	53.0118	56.557	3.5452	133.333	136.364	3.0303
														920	53.1445	52.1563	-0.988148	139.535	139.535	3.68914e-11
														921	51.4129	55.4502	4.03737	139.535	136.364	-3.17125
														922	51.9295	53.2208	1.29136	130.435	133.333	2.89855
														923	54.9707	55.7264	0.755695	139.535	136.364	-3.17125
														924	52.0719	56.0796	4.00768	139.535	142.857	3.32226
														925	49.8483	52.9937	3.14536	133.333	133.333	-3.36797e-11
														926	54.9274	54.0835	-0.843915	139.535	142.857	3.32226
														927	55.5117	58.3394	2.82766	133.333	130.435	-2.89855
														928	58.4558	58.9805	0.524725	139.535	136.364	-3.17125
														929	52.7778	55.9789	3.20105	133.333	136.364	3.0303
														930	48.6945	51.1579	2.46339	139.535	139.535	3.68914e-11
														931	52.9376	53.576	0.638351	146.341	139.535	-6.80658
														932	54.1702	55.2568	1.08655	133.333	139.535	6.20155
														933	53.2034	53.9817	0.778315	139.535	139.535	-3.68914e-11
														934	54.2048	55.2197	1.01489	136.364	136.364	3.52145e-11
														935	52.2445	52.5945	0.350007	136.364	136.364	-3.52145e-11
														936	56.1699	56.5575	0.387638	133.333	133.333	3.36797e-11
														937	58.8755	60.3792	1.50364	142.857	139.535	-3.32226
														938	55.6588	59.2578	3.59896	133.333	136.364	3.0303
														939	58.4117	57.6718	-0.739933	142.857	139.535	-3.32226
														940	55.0308	54.3184	-0.712372	136.364	136.364	-3.52145e-11
														941	53.8247	53.1854	-0.639265	136.364	136.364	-3.52145e-11
														942	52.4464	55.5624	3.11598	136.364	133.333	-3.0303
														943	53.3226	55.7184	2.39583	133.333	136.364	3.0303
														944	54.5784	54.4602	-0.118233	139.535	139.535	3.68914e-11
														945	53.6696	54.6732	1.00359	139.535	139.535	-3.68914e-11
														946	53.3417	54.6082	1.26657	142.857	139.535	-3.32226
														947	49.0601	52.2884	3.22834	139.535	142.857	3.32226
														948	55.5769	52.6091	-2.96782	139.535	139.535	-3.68914e-11
														949	56.7339	59.8781	3.14412	136.364	136.364	3.52145e-11
														950	58.419	59.7353	1.31627	136.364	133.333	-3.0303
														951	53.3191	57.5624	4.24326	133.333	136.364	3.0303
														952	54.3759	55.2947	0.918757	136.364	136.364	-3.52145e-11
														953	54.1559	56.0013	1.8454	136.364	136.364	3.52145e-11
														954	53.3515	53.4358	0.0842091	139.535	139.535	-3.68914e-11
														955	53.1164	52.5986	-0.517885	133.333	133.333	0
														956	54.7686	55.7835	1.01493	133.333	133.333	3.36797e-11
														957	50.3305	54.456	4.12543	136.364	136.364	-3.52145e-11
														958	50.9698	52.4089	1.43915	133.333	133.333	3.36797e-11
														959	50.8308	51.8257	0.994931	136.364	136.364	-3.52145e-11
														960	51.3707	53.0253	1.65462	130.435	133.333	2.89855
														961	50.4386	53.8119	3.37327	139.535	133.333	-6.20155
														962	50.2327	49.7227	-0.509935	136.364	139.535	3.17125
														963	50.2273	51.2936	1.06631	133.333	133.333	-3.36797e-11
														964	53.7036	54.8329	1.12931	142.857	139.535	-3.32226
														965	55.9528	54.8238	-1.12902	136.364	136.364	-3.52145e-11
														966	53.4587	55.0559	1.5972	136.364	139.535	3.17125
														967	49.9942	52.1906	2.19643	139.535	136.364	-3.17125
														968	51.6459	49.5043	-2.14166	142.857	146.341	3.48432
														969	50.3824	46.3256	-4.0568	139.535	139.535	3.68914e-11
														970	45.9711	48.1075	2.13636	139.535	139.535	3.68914e-11
														971	45.1954	50.5959	5.40052	139.535	139.535	-3.68914e-11
														972	48.6721	50.6991	2.027	139.535	139.535	3.68914e-11
														973	47.5515	49.9707	2.41928	136.364	136.364	-3.52145e-11
														974	50.6622	48.5456	-2.11657	139.535	139.535	3.68914e-11
														975	51.9671	54.5931	2.62598	139.535	139.535	-3.68914e-11
														976	54.8285	55.8762	1.0477	139.535	136.364	-3.17125
														977	56.0397	56.6312	0.591585	136.364	139.535	3.17125
														978	56.4988	57.0158	0.516959	136.364	136.364	3.52145e-11
														979	54.5219	57.2612	2.73934	136.364	136.364	-3.52145e-11
														980	53.2022	56.2002	2.99801	136.364	136.364	3.52145e-11
														981	54.1645	54.0034	-0.161059	139.535	136.364	-3.17125
														982	52.7094	54.5031	1.79376	136.364	139.535	3.17125
														983	53.6959	53.9173	0.221378	139.535	136.364	-3.17125
														984	54.0687	55.4653	1.39663	136.364	136.364	3.52145e-11
														985	51.1926	53.6079	2.4153	136.364	136.364	-3.52145e-11
														986	53.6976	53.8338	0.13621	136.364	139.535	3.17125
														987	56.6578	58.0714	1.41361	139.535	136.364	-3.17125
														988	55.2109	57.2888	2.07786	133.333	136.364	3.0303
														989	56.1844	55.707	-0.47745	133.333	136.364	3.0303
														990	53.833	54.39	0.557018	133.333	130.435	-2.89855
														991	54.3674	54.8677	0.500301	136.364	136.364	-3.52145e-11
														992	53.7275	57.459	3.73149	133.333	133.333	3.36797e-11
														993	55.1043	54.995	-0.109303	136.364	136.364	-3.52145e-11
														994	56.9442	58.8783	1.93408	136.364	133.333	-3.0303
														995	57.5389	60.0547	2.51577	136.364	136.364	0
														996	52.4913	55.7851	3.29385	139.535	142.857	3.32226
														997	54.2308	53.6293	-0.601527	139.535	142.857	3.32226
														998	54.0743	52.9344	-1.13987	139.535	142.857	3.32226
														999	52.5912	57.0992	4.50801	139.535	136.364	-3.17125
														1000	57.1448	58.0914	0.946593	139.535	139.535	3.68914e-11

## Sheet: Couple 2
CC Number	Depth GS	Depth Est	Depth error	Rate GS	Rate Est	Rate error	CC Number	Depth GS	Depth Est	Depth error	Rate GS	Rate Est	Rate error	CC Number	Depth GS	Depth Est	Depth error	Rate GS	Rate Est	Rate error	CC Number	Depth GS	Depth Est	Depth error	Rate GS	Rate Est	Rate error
1	57.5669	60.0481	2.48121	100	100	2.98428e-13	1	52.9257	55.4331	2.50735	120	117.647	-2.35294	1	59.2636	60.9103	1.64665	139.535	136.364	-3.17125	1	59.5707	64.6017	5.03107	81.0811	81.0811	0
2	55.4606	61.4595	5.99893	100	100	2.98428e-13	2	53.9678	58.9575	4.98971	120	117.647	-2.35294	2	59.5851	63.9674	4.38228	139.535	136.364	-3.17125	2	57.6442	62.4902	4.84607	81.0811	81.0811	0
3	55.2499	58.0601	2.81019	95.2381	96.7742	1.5361	3	53.1315	54.9896	1.8581	122.449	122.449	0	3	58.7085	62.7216	4.01311	139.535	139.535	-5.96856e-13	3	59.5546	62.5395	2.98493	81.0811	81.0811	0
4	52.9787	60.382	7.40335	98.3607	96.7742	-1.58646	4	52.7562	56.5337	3.77753	122.449	122.449	0	4	60.1074	62.5355	2.42803	139.535	139.535	0	4	59.5109	62.4147	2.90376	80	81.0811	1.08108
5	51.8854	56.5466	4.66115	98.3607	100	1.63934	5	53.1686	55.5684	2.39977	122.449	122.449	4.54747e-13	5	59.5589	62.8921	3.33326	142.857	142.857	0	5	59.5078	68.3282	8.82044	82.1918	81.0811	-1.1107
6	49.6406	54.629	4.9884	96.7742	96.7742	0	6	52.8255	55.5956	2.77009	122.449	122.449	0	6	60.2688	61.276	1.0072	146.341	146.341	0	6	58.6394	58.9991	0.359718	82.1918	81.0811	-1.1107
7	51.9784	55.0274	3.049	101.695	101.695	-3.12639e-13	7	54.2785	56.733	2.45447	120	120	0	7	59.9731	61.0049	1.03179	142.857	142.857	0	7	59.641	64.9691	5.32804	81.0811	82.1918	1.1107
8	54.0131	59.3897	5.37661	101.695	100	-1.69492	8	52.9115	57.815	4.90346	120	122.449	2.44898	8	60.4631	50.3411	-10.122	142.857	142.857	0	8	59.7806	61.8469	2.06627	81.0811	82.1918	1.1107
9	52.6468	57.4454	4.79853	100	100	2.98428e-13	9	52.4329	55.1662	2.73333	120	117.647	-2.35294	9	59.967	68.7521	8.78515	139.535	139.535	0	9	58.9953	67.5288	8.53344	83.3333	84.507	1.17371
10	53.3551	58.1264	4.77133	101.695	101.695	0	10	52.0873	56.3538	4.26654	127.66	127.66	0	10	61.3769	71.232	9.85512	142.857	139.535	-3.32226	10	59.2856	58.8912	-0.394368	82.1918	82.1918	0
11	51.7395	58.0935	6.35406	107.143	107.143	-3.41061e-13	11	57.7551	55.4036	-2.35152	120	117.647	-2.35294	11	61.1972	63.2171	2.01984	139.535	142.857	3.32226	11	59.9597	65.8296	5.86985	83.3333	83.3333	0
12	55.5825	57.28	1.6974	105.263	103.448	-1.81488	12	58.2094	62.7658	4.55639	120	117.647	-2.35294	12	60.6882	61.8114	1.12321	136.364	136.364	-1.08002e-12	12	59.5824	67.5912	8.00886	83.3333	82.1918	-1.14155
13	57.872	61.1136	3.24158	100	100	-5.96856e-13	13	57.4935	64.1498	6.65629	122.449	122.449	8.95284e-13	13	61.7054	64.3242	2.61885	136.364	133.333	-3.0303	13	59.2422	62.7078	3.46569	88.2353	88.2353	0
14	57.0887	62.7519	5.66328	100	100	-5.96856e-13	14	58.6045	62.1548	3.5503	115.385	115.385	0	14	60.9597	66.2802	5.32043	133.333	136.364	3.0303	14	58.5858	65.372	6.78613	88.2353	88.2353	0
15	56.3652	60.795	4.42979	96.7742	96.7742	0	15	58.8966	63.6719	4.77528	115.385	115.385	0	15	60.7011	63.535	2.83387	139.535	139.535	-1.16529e-12	15	58.8058	62.7283	3.92252	85.7143	84.507	-1.20724
16	56.6448	61.7257	5.08082	96.7742	96.7742	5.54223e-13	16	58.4512	61.7391	3.28783	117.647	122.449	4.80192	16	61.0255	66.2864	5.26085	139.535	139.535	0	16	59.5221	64.3754	4.85324	84.507	86.9565	2.44948
17	58.8859	63.7486	4.86271	96.7742	96.7742	-5.54223e-13	17	57.799	65.5861	7.78704	117.647	115.385	-2.26244	17	61.5824	64.963	3.38059	150	146.341	-3.65854	17	59.3957	63.9786	4.58294	82.1918	81.0811	-1.1107
18	58.272	65.1318	6.85978	100	100	0	18	60.1745	64.2091	4.03454	117.647	115.385	-2.26244	18	60.9983	60.8576	-0.140652	142.857	146.341	3.48432	18	59.1168	67.9735	8.85674	84.507	85.7143	1.20724
19	58.622	62.0198	3.39775	100	100	5.96856e-13	19	60.6202	66.7752	6.15495	117.647	117.647	-8.2423e-13	19	61.3964	61.82	0.423561	142.857	142.857	1.22213e-12	19	60.0845	64.6806	4.59609	86.9565	86.9565	0
20	58.6651	65.7829	7.1178	105.263	103.448	-1.81488	20	59.178	64.032	4.85396	122.449	122.449	8.95284e-13	20	61.9236	66.8068	4.88317	142.857	139.535	-3.32226	20	58.1887	64.5081	6.31946	83.3333	83.3333	0
21	58.7695	58.8061	0.0366279	95.2381	96.7742	1.5361	21	59.5852	64.7288	5.14364	120	120	0	21	61.2322	67.193	5.9608	142.857	142.857	0	21	59.6665	60.4617	0.795254	84.507	84.507	0
22	58.276	66.9344	8.65843	96.7742	98.3607	1.58646	22	59.535	63.7989	4.26396	117.647	117.647	-8.2423e-13	22	61.869	66.2457	4.37671	139.535	139.535	0	22	59.1896	67.3665	8.17697	84.507	84.507	0
23	58.3664	61.1827	2.8163	100	98.3607	-1.63934	23	58.5589	62.8764	4.31748	120	120	0	23	61.3671	63.2841	1.917	139.535	142.857	3.32226	23	59.6395	64.0787	4.43921	86.9565	88.2353	1.27877
24	56.7374	63.6907	6.95336	101.695	101.695	0	24	59.3573	62.856	3.49872	122.449	122.449	8.95284e-13	24	61.1776	63.4193	2.24168	139.535	139.535	0	24	59.2847	63.0311	3.74646	84.507	82.1918	-2.31526
25	56.9986	60.4028	3.40415	101.695	101.695	0	25	59.327	63.9028	4.57578	117.647	120	2.35294	25	59.7697	62.8146	3.04486	142.857	139.535	-3.32226	25	57.7617	63.2718	5.51009	78.9474	81.0811	2.13371
26	56.1017	60.4742	4.37243	98.3607	100	1.63934	26	58.8837	63.7491	4.8654	120	120	0	26	61.2605	65.9457	4.68513	139.535	139.535	-1.16529e-12	26	58.9369	64.2982	5.36132	80	80	0
27	56.0349	62.3885	6.35353	100	98.3607	-1.63934	27	59.2665	62.697	3.43052	117.647	117.647	0	27	60.3188	62.8333	2.51453	139.535	142.857	3.32226	27	57.9807	62.6775	4.69687	82.1918	81.0811	-1.1107
28	56.5004	60.9367	4.43623	100	101.695	1.69492	28	58.8102	63.1099	4.29972	122.449	120	-2.44898	28	60.9619	64.6727	3.71084	139.535	136.364	-3.17125	28	58.1556	61.4462	3.29064	80	81.0811	1.08108
29	57.1499	61.1571	4.00722	100	98.3607	-1.63934	29	59.5444	62.7684	3.22404	120	122.449	2.44898	29	60.7009	64.5768	3.87589	142.857	142.857	0	29	58.343	54.6571	-3.68588	76.9231	100	23.0769
30	57.2415	62.2167	4.97515	101.695	103.448	1.75336	30	58.7578	63.7452	4.98741	122.449	122.449	8.95284e-13	30	60.3144	61.6761	1.36173	142.857	146.341	3.48432	30	58.6836	56.0464	-2.63726	81.0811	76.9231	-4.158
31	57.498	60.8812	3.38329	98.3607	98.3607	0	31	58.8304	60.6275	1.79707	122.449	122.449	-8.95284e-13	31	59.9495	61.9707	2.02123	139.535	139.535	0	31	59.1391	60.901	1.76183	81.0811	67.4157	-13.6654
32	55.9912	60.6403	4.64905	98.3607	98.3607	0	32	59.7349	64.9503	5.21548	125	122.449	-2.55102	32	60.4655	64.2555	3.79008	142.857	139.535	-3.32226	32	56.9537	61.6873	4.73355	81.0811	81.0811	0
33	57.8462	63.7749	5.9287	101.695	101.695	0	33	60.664	62.524	1.85999	117.647	117.647	-8.2423e-13	33	60.6496	61.6513	1.0017	139.535	139.535	0	33	59.5705	53.2464	-6.3241	75.9494	105.263	29.3138
34	57.886	59.6571	1.77107	101.695	101.695	0	34	59.4365	66.4302	6.99372	115.385	117.647	2.26244	34	61.745	64.9102	3.16526	142.857	142.857	-1.22213e-12	34	59.0088	67.4688	8.46002	80	62.5	-17.5
35	58.8682	62.1946	3.32642	98.3607	98.3607	0	35	59.4773	62.444	2.96669	122.449	120	-2.44898	35	61.118	62.0133	0.895298	142.857	139.535	-3.32226	35	59.8121	62.4114	2.59935	81.0811	81.0811	0
36	58.4107	65.0356	6.62486	101.695	100	-1.69492	36	58.4234	62.5901	4.16662	115.385	117.647	2.26244	36	61.0929	59.3792	-1.71369	142.857	139.535	-3.32226	36	57.9666	63.9768	6.01021	80	81.0811	1.08108
37	59.0684	62.6498	3.5814	103.448	103.448	1.26477e-12	37	59.6167	63.5408	3.92404	117.647	117.647	-1.64846e-12	37	60.9686	66.969	6.00043	139.535	139.535	0	37	58.8304	54.7551	-4.07522	78.9474	96.7742	17.8268
38	56.5166	62.0603	5.54369	101.695	101.695	0	38	60.6421	66.302	5.65994	122.449	120	-2.44898	38	60.9305	65.7808	4.85037	133.333	136.364	3.0303	38	58.8295	66.3857	7.55622	82.1918	68.1818	-14.01
39	59.1387	63.4301	4.29144	98.3607	98.3607	-1.15108e-12	39	59.862	57.8787	-1.98333	122.449	120	-2.44898	39	61.0551	64.9471	3.89201	139.535	136.364	-3.17125	39	59.3948	60.9539	1.55908	86.9565	86.9565	0
40	59.2914	62.2367	2.94532	100	100	1.19371e-12	40	60.3071	64.6685	4.36134	122.449	120	-2.44898	40	61.2713	64.3415	3.07023	133.333	136.364	3.0303	40	58.4365	66.2343	7.7978	86.9565	86.9565	0
41	59.6495	59.3082	-0.341256	105.263	103.448	-1.81488	41	59.6135	69.4074	9.79392	122.449	122.449	1.77636e-12	41	60.6661	60.7905	0.124395	136.364	136.364	0	41	58.8895	60.0283	1.1388	86.9565	86.9565	0
42	59.4151	64.5016	5.08648	105.263	103.448	-1.81488	42	60.0548	61.1265	1.07167	122.449	120	-2.44898	42	60.9733	68.4087	7.43537	139.535	139.535	2.33058e-12	42	58.1855	62.7791	4.59351	84.507	83.3333	-1.17371
43	59.9194	65.0403	5.12095	100	100	-1.19371e-12	43	60.1022	63.0809	2.97871	122.449	125	2.55102	43	61.4223	62.886	1.46369	139.535	139.535	0	43	58.2022	63.6413	5.43915	85.7143	86.9565	1.24224
44	59.4425	62.3376	2.89515	96.7742	98.3607	1.58646	44	60.2706	66.4142	6.14361	127.66	125	-2.65957	44	61.5292	64.9601	3.43083	136.364	133.333	-3.0303	44	58.4385	61.0567	2.6182	85.7143	86.9565	1.24224
45	59.2317	63.5431	4.31145	96.7742	96.7742	0	45	59.9681	63.4138	3.44566	125	127.66	2.65957	45	61.6954	67.1234	5.42794	136.364	136.364	0	45	58.8917	63.2031	4.31142	83.3333	82.1918	-1.14155
46	59.29	64.0629	4.77283	96.7742	96.7742	-1.10845e-12	46	60.2478	62.6074	2.35962	125	125	0	46	61.366	60.4458	-0.920198	139.535	142.857	3.32226	46	58.6468	63.3365	4.68973	81.0811	81.0811	0
47	58.1227	63.1379	5.01516	98.3607	96.7742	-1.58646	47	60.8513	64.6913	3.84006	125	122.449	-2.55102	47	60.8104	60.7536	-0.0567804	139.535	136.364	-3.17125	47	58.6364	63.4068	4.77042	80	80	0
48	56.3781	59.6103	3.23224	93.75	95.2381	1.4881	48	60.0564	66.032	5.9756	125	125	0	48	60.6334	67.4383	6.80492	136.364	136.364	2.18847e-12	48	58.6647	63.9422	5.27744	81.0811	80	-1.08108
49	58.0407	62.0225	3.98175	93.75	93.75	1.03739e-12	49	59.7433	60.9039	1.16055	122.449	125	2.55102	49	59.8734	64.6376	4.76429	136.364	139.535	3.17125	49	58.547	61.5551	3.00812	80	81.0811	1.08108
50	58.1291	63.5938	5.46475	95.2381	95.2381	0	50	59.8251	63.4714	3.64636	125	122.449	-2.55102	50	60.5203	62.217	1.69675	136.364	136.364	0	50	58.869	65.2339	6.3649	82.1918	82.1918	0
51	58.19	64.2267	6.03673	100	98.3607	-1.63934	51	60.2929	65.6942	5.40125	122.449	122.449	-1.77636e-12	51	59.8141	62.7197	2.9056	139.535	136.364	-3.17125	51	59.722	61.6742	1.9522
52	57.5394	57.9471	0.407784	98.3607	100	1.63934	52	59.4198	64.8	5.3802	115.385	117.647	2.26244	52	59.4535	62.1353	2.6818	133.333	136.364	3.0303	52	57.4885	61.8681	4.37958	81.0811	82.1918	1.1107
53	59.0008	63.856	4.85526	100	98.3607	-1.63934	53	60.0707	62.9482	2.8775	117.647	117.647	-1.64846e-12	53	59.5791	62.8221	3.24301	139.535	139.535	-2.33058e-12	53	59.4074	61.2285	1.8211	81.0811	82.1918	1.1107
54	59.2834	61.4728	2.18936	98.3607	100	1.63934	54	60.0655	65.168	5.10256	120	120	0	54	59.8247	61.1533	1.3286	136.364	139.535	3.17125	54	58.5287	67.0263	8.49756	82.1918	80	-2.19178
55	58.8804	62.8472	3.96685	98.3607	98.3607	0	55	60.1995	65.1001	4.90063	122.449	122.449	1.77636e-12	55	59.8127	59.9832	0.170557	139.535	136.364	-3.17125	55	57.5966	60.5171	2.92042	81.0811	82.1918	1.1107
56	58.6468	64.791	6.14418	98.3607	96.7742	-1.58646	56	58.8558	62.5116	3.65586	122.449	122.449	0	56	59.0564	63.92	4.8636	142.857	139.535	-3.32226	56	56.403	61.6681	5.26507	80	80	0
57	58.9169	63.6374	4.72051	96.7742	96.7742	-1.10845e-12	57	59.782	63.0676	3.28552	117.647	117.647	0	57	61.0442	64.0352	2.99097	136.364	139.535	3.17125	57	57.2624	52.7202	-4.54221	80	98.3607	18.3607
58	58.0252	64.192	6.16674	101.695	101.695	1.22213e-12	58	57.4565	63.3556	5.89908	125	122.449	-2.55102	58	60.8939	61.0251	0.131222	139.535	139.535	0	58	58.4877	63.8779	5.39022	80	67.4157	-12.5843
59	58.4325	59.1112	0.678731	98.3607	100	1.63934	59	58.7711	60.8498	2.07861	122.449	122.449	0	59	60.5226	65.4589	4.93637	139.535	139.535	0	59	59.8357	62.1627	2.32696	81.0811	80	-1.08108
60	57.2139	65.0914	7.87756	101.695	101.695	0	60	58.4576	63.9516	5.49401	125	125	1.84741e-12	60	60.4816	64.2587	3.77711	136.364	136.364	2.18847e-12	60	59.4913	62.711	3.21968	90.9091	89.5522	-1.35685
61	56.4678	59.5848	3.11695	105.263	103.448	-1.81488	61	58.7794	61.4433	2.66399	122.449	125	2.55102	61	60.2123	61.1515	0.939257	139.535	139.535	0	61	58.7809	67.5872	8.80628	90.9091	89.5522	-1.35685
62	55.7869	59.8014	4.01454	101.695	103.448	1.75336	62	51.4438	59.6304	8.18667	127.66	125	-2.65957	62	61.2135	64.5312	3.31771	139.535	139.535	0	62	58.5202	60.3745	1.85429	88.2353	89.5522	1.31694
63	55.9436	59.8292	3.88564	101.695	101.695	0	63	59.4315	56.1406	-3.2909	122.449	122.449	0	63	60.8295	62.1863	1.3568	142.857	142.857	2.41585e-12	63	58.4921	62.9216	4.42957	84.507	85.7143	1.20724
64	55.8156	58.0119	2.19629	100	100	0	64	59.6402	67.1843	7.54412	120	120	0	64	60.7069	59.6135	-1.0935	142.857	142.857	2.41585e-12	64	58.1947	61.7447	3.55003	82.1918	81.0811	-1.1107
65	54.7164	59.293	4.57659	98.3607	100	1.63934	65	59.63	61.4021	1.77207	117.647	120	2.35294	65	61.4347	66.5546	5.11989	136.364	136.364	-2.18847e-12	65	58.4026	63.7802	5.37756	84.507	84.507	1.69109e-12
66	52.6544	57.4682	4.81377	101.695	101.695	0	66	59.3212	64.6502	5.32897	125	122.449	-2.55102	66	60.9099	64.8631	3.95327	139.535	139.535	0	66	58.7734	63.8352	5.06184	83.3333	83.3333	0
67	56.8375	58.7851	1.94758	103.448	101.695	-1.75336	67	59.9005	55.6726	-4.22785	122.449	122.449	0	67	61.2336	64.1115	2.87788	136.364	136.364	0	67	57.7345	63.3873	5.65277	84.507	84.507	-1.69109e-12
68	57.1037	62.5431	5.43945	101.695	100	-1.69492	68	59.6241	59.8114	0.187302	122.449	122.449	0	68	61.1772	65.402	4.22481	133.333	133.333	0	68	58.1655	60.69	2.52445	81.0811	81.0811	1.54898e-12
69	55.7256	56.6236	0.897923	107.143	105.263	-1.8797	69	59.6934	71.6563	11.9629	122.449	122.449	0	69	61.2288	65.0246	3.79571	139.535	139.535	0	69	56.0241	60.0943	4.0702	82.1918	81.0811	-1.1107
70	56.6439	62.5704	5.92649	107.143	105.263	-1.8797	70	59.4983	61.9448	2.44649	122.449	125	2.55102	70	60.7451	63.4128	2.66771	133.333	136.364	3.0303	70	58.3583	60.0101	1.65182	82.1918	81.0811	-1.1107
71	54.7384	59.697	4.95855	105.263	109.091	3.82775	71	57.9937	59.8815	1.88776	122.449	120	-2.44898	71	60.7088	65.1282	4.41934	136.364	133.333	-3.0303	71	58.2418	63.0912	4.84931	81.0811	81.0811	1.54898e-12
72	56.16	57.3995	1.23949	105.263	105.263	2.62901e-12	72	56.6931	62.3458	5.65273	117.647	117.647	-1.64846e-12	72	60.0314	63.7573	3.72582	142.857	142.857	2.41585e-12	72	58.0531	61.2076	3.15444	84.507	83.3333	-1.17371
73	56.6583	60.3232	3.66485	105.263	103.448	-1.81488	73	58.5973	62.0302	3.4329	122.449	120	-2.44898	73	60.7573	62.4138	1.6565	142.857	142.857	0	73	57.52	61.7903	4.27031	84.507	83.3333	-1.17371
74	55.4553	60.1489	4.69367	101.695	101.695	0	74	58.835	62.5921	3.75712	120	120	0	74	60.712	63.3386	2.6266	142.857	139.535	-3.32226	74	58.5752	52.5747	-6.00046	77.9221	101.695	23.7728
75	51.5859	58.0196	6.43364	101.695	101.695	0	75	59.4416	62.173	2.73136	117.647	117.647	0	75	60.91	62.9562	2.0462	136.364	139.535	3.17125	75	56.8878	55.3042	-1.58357	78.9474	80	1.05263
76	52.4574	55.1496	2.69227	105.263	105.263	0	76	57.0293	61.5672	4.5379	120	122.449	2.44898	76	61.4792	64.3516	2.87235	142.857	139.535	-3.32226	76	56.7393	61.2208	4.4815	78.9474	63.8298	-15.1176
77	56.068	57.723	1.65495	101.695	101.695	0	77	57.8807	61.999	4.11835	122.449	120	-2.44898	77	60.883	68.2209	7.33792	133.333	136.364	3.0303	77	57.8225	62.2451	4.42266	80	78.9474	-1.05263
78	56.0996	60.0604	3.9608	103.448	103.448	0	78	59.929	63.2492	3.32027	120	120	0	78	61.0093	62.7027	1.69339	139.535	139.535	0	78	58.314	62.1475	3.83352	77.9221	78.9474	1.02529
79	54.104	58.5111	4.40713	98.3607	100	1.63934	79	60.0407	63.4445	3.40377	120	122.449	2.44898	79	60.9249	62.3838	1.45889	142.857	142.857	2.41585e-12	79	59.0108	62.1948	3.184	78.9474	78.9474	-1.47793e-12
80	54.8402	57.5191	2.67889	101.695	100	-1.69492	80	59.5303	64.6704	5.14011	122.449	122.449	-3.55271e-12	80	60.9404	64.399	3.45866	139.535	136.364	-3.17125	80	57.0104	54.1451	-2.86536	81.0811	67.4157	-13.6654
81	52.718	57.8365	5.11848	100	100	0	81	60.0384	63.2675	3.2291	120	117.647	-2.35294	81	60.5235	63.9969	3.47342	139.535	142.857	3.32226	81	57.5132	62.8635	5.35034	81.0811	67.4157	-13.6654
82	55.967	58.3906	2.42356	98.3607	98.3607	0	82	59.6114	63.2874	3.6761	120	120	0	82	60.2116	61.6018	1.39021	142.857	139.535	-3.32226	82	59.0373	52.1692	-6.86812	77.9221	103.448	25.5262
83	56.3451	60.0236	3.67851	101.695	101.695	0	83	59.0325	64.1494	5.11689	120	122.449	2.44898	83	60.0281	62.3873	2.35925	139.535	146.341	6.80658	83	58.6294	60.2932	1.66381	84.507	85.7143	1.20724
84	56.2366	58.3538	2.11721	98.3607	100	1.63934	84	59.9665	63.552	3.5855	120	120	0	84	60.7956	63.2052	2.40957	139.535	136.364	-3.17125	84	58.9987	67.2784	8.27976	84.507	85.7143	1.20724
85	53.4772	61.3969	7.9197	101.695	100	-1.69492	85	59.2734	63.1564	3.88299	117.647	117.647	3.28271e-12	85	60.3666	64.2169	3.85023	139.535	142.857	3.32226	85	56.2786	61.1107	4.83203	84.507	84.507	1.69109e-12
86	55.9402	55.9251	-0.0150792	95.2381	96.7742	1.5361	86	59.9604	63.4409	3.4805	125	122.449	-2.55102	86	60.7361	61.6854	0.949251	142.857	139.535	-3.32226	86	57.8788	62.8889	5.01012	83.3333	82.1918	-1.14155
87	54.467	61.5696	7.1026	98.3607	98.3607	0	87	60.0948	64.907	4.81219	120	122.449	2.44898	87	60.7126	62.9813	2.26866	146.341	146.341	-2.52953e-12	87	56.0415	60.7735	4.73204	83.3333	84.507	1.17371
88	53.3907	56.5473	3.15665	101.695	100	-1.69492	88	59.9578	62.597	2.6392	122.449	122.449	0	88	60.5722	65.8059	5.23369	139.535	139.535	4.63274e-12	88	56.6628	57.8586	1.19586	80	80	0
89	55.0864	59.4763	4.38996	98.3607	98.3607	0	89	59.9669	63.1072	3.14037	117.647	115.385	-2.26244	89	60.3733	62.1508	1.77754	142.857	142.857	-4.86011e-12	89	55.3479	59.7373	4.3894	81.0811	81.0811	0
90	56.1153	58.5751	2.45976	98.3607	100	1.63934	90	60.5772	65.3252	4.74801	120	122.449	2.44898	90	61.2382	63.5638	2.32562	146.341	146.341	5.08749e-12	90	56.6504	58.5859	1.93548	80	80	0
91	54.5597	61.5496	6.98987	100	98.3607	-1.63934	91	60.6068	64.4476	3.84083	115.385	117.647	2.26244	91	61.3286	61.053	-0.275517	139.535	139.535	0	91	57.4477	64.1777	6.73007	81.0811	80	-1.08108
92	56.2373	58.4142	2.17692	101.695	103.448	1.75336	92	60.074	64.856	4.78205	117.647	115.385	-2.26244	92	60.8998	58.4082	-2.4916	139.535	139.535	0	92	58.0901	60.8658	2.77564	81.0811	80	-1.08108
93	54.254	59.9203	5.66625	100	100	0	93	59.6143	63.2742	3.65988	117.647	117.647	0	93	60.737	68.3136	7.57656	142.857	139.535	-3.32226	93	56.6292	61.5971	4.96788	78.9474	80	1.05263
94	54.6686	57.6666	2.99796	100	98.3607	-1.63934	94	59.5982	64.2039	4.60572	122.449	120	-2.44898	94	60.2145	64.7968	4.58235	133.333	139.535	6.20155	94	55.5926	52.2047	-3.38792	77.9221	105.263	27.3411
95	55.2718	60.5573	5.28542	100	98.3607	-1.63934	95	59.1089	57.8809	-1.228	125	122.449	-2.55102	95	60.3075	62.1348	1.82731	139.535	136.364	-3.17125	95	57.8315	54.3145	-3.51704	78.9474	76.9231	-2.02429
96	56.8068	59.5354	2.72864	101.695	103.448	1.75336	96	58.8601	63.1911	4.33095	125	122.449	-2.55102	96	59.6943	62.5594	2.86504	142.857	139.535	-3.32226	96	56.2473	63.7747	7.52744	83.3333	66.6667	-16.6667
97	56.181	56.0665	-0.11446	101.695	103.448	1.75336	97	59.9024	65.999	6.09665	120	120	0	97	60.4018	62.6499	2.24812	139.535	142.857	3.32226	97	55.877	59.2335	3.35646	82.1918	82.1918	-1.59162e-12
98	56.2934	63.2587	6.96522	101.695	103.448	1.75336	98	59.5274	64.3771	4.84964	117.647	120	2.35294	98	60.5993	64.6136	4.01426	139.535	139.535	0	98	56.7692	61.7362	4.96698	82.1918	81.0811	-1.1107
99	56.7251	60.2059	3.48081	103.448	101.695	-1.75336	99	57.8157	62.5209	4.70517	122.449	122.449	0	99	59.5733	64.3721	4.79882	130.435	133.333	2.89855	99	55.6582	51.4652	-4.193	77.9221	107.143	29.2208
100	57.4071	61.0339	3.62675	101.695	101.695	0	100	56.9997	60.9321	3.93243	122.449	122.449	0	100	60.0964	59.261	-0.835308	142.857	139.535	-3.32226	100	55.6895	59.0522	3.36269	81.0811	80	-1.08108
101	56.016	60.8418	4.82579	103.448	105.263	1.81488	101	57.0406	60.5257	3.48507	122.449	122.449	0	101	60.3661	64.6695	4.30334	142.857	142.857	0	101	54.6044	58.2163	3.61186	81.0811	80	-1.08108
102	55.6908	60.8923	5.2015	103.448	103.448	-2.52953e-12	102	57.1936	61.4647	4.27112	122.449	122.449	0	102	60.416	63.6521	3.2361	139.535	139.535	4.63274e-12	102	54.4236	51.749	-2.67457	77.9221	103.448	25.5262
103	57.2398	58.493	1.25324	103.448	101.695	-1.75336	103	58.5658	61.8985	3.33271	122.449	122.449	-3.55271e-12	103	60.4242	62.6804	2.25621	139.535	139.535	-4.63274e-12	103	55.7386	59.8962	4.15759	80	64.5161	-15.4839
104	57.5818	60.5307	2.9489	101.695	101.695	0	104	58.2782	61.3942	3.11597	125	122.449	-2.55102	104	59.5778	63.111	3.53319	136.364	136.364	0	104	55.6654	59.4081	3.74272	83.3333	82.1918	-1.14155
105	56.8338	61.7883	4.95447	96.7742	98.3607	1.58646	105	58.7887	61.5905	2.80181	120	122.449	2.44898	105	60.6147	62.7221	2.10735	139.535	139.535	0	105	56.159	50.4588	-5.70013	76.9231	101.695	24.7718
106	56.5365	60.2297	3.69317	98.3607	96.7742	-1.58646	106	55.4996	61.6034	6.1038	125	125	0	106	60.5761	64.8527	4.27665	136.364	136.364	0	106	53.1212	60.4632	7.34201	80	64.5161	-15.4839
107	56.9989	60.632	3.63308	101.695	101.695	-2.44427e-12	107	56.8407	59.2826	2.44194	122.449	122.449	0	107	61.2696	63.7601	2.49049	142.857	142.857	0	107	55.9564	57.728	1.77165	81.0811	81.0811	3.11218e-12
108	57.4416	61.5517	4.11018	96.7742	96.7742	2.21689e-12	108	56.1277	61.7736	5.64588	125	122.449	-2.55102	108	60.8319	61.9738	1.14195	146.341	146.341	0	108	57.1553	55.327	-1.82823	80	82.1918	2.19178
109	56.6936	60.681	3.98738	95.2381	96.7742	1.5361	109	58.223	59.6585	1.43556	117.647	120	2.35294	109	61.0921	61.548	0.455928	139.535	139.535	4.63274e-12	109	54.1582	57.4868	3.32856	80	82.1918	2.19178
110	53.9468	59.0803	5.13351	96.7742	96.7742	0	110	58.3733	61.1595	2.78624	120	122.449	2.44898	110	61.0778	65.5891	4.51138	146.341	142.857	-3.48432	110	54.7595	49.6913	-5.06824	80	96.7742	16.7742
111	54.0892	58.2346	4.1454	98.3607	98.3607	0	111	59.4955	63.5326	4.0371	122.449	120	-2.44898	111	60.3143	63.544	3.2297	136.364	139.535	3.17125	111	56.9043	55.2827	-1.62168	82.1918	76.9231	-5.2687
112	54.4461	57.536	3.08994	96.7742	96.7742	2.21689e-12	112	59.2861	63.7709	4.48479	122.449	122.449	0	112	60.6312	59.9224	-0.708884	136.364	136.364	0	112	54.6724	52.8138	-1.85857	81.0811	83.3333	2.25225
113	53.7471	61.7918	8.04468	101.695	100	-1.69492	113	59.3772	62.2153	2.83805	122.449	122.449	0	113	61.3318	65.0753	3.74354	142.857	139.535	-3.32226	113	52.6714	55.0874	2.416	81.0811	71.4286	-9.65251
114	53.09	57.0435	3.95345	101.695	101.695	-2.44427e-12	114	60.0777	64.2041	4.12638	122.449	122.449	0	114	59.3666	66.8481	7.48156	139.535	142.857	3.32226	114	51.5544	55.6895	4.13514	78.9474	77.9221	-1.02529
115	55.3649	57.0768	1.7119	95.2381	96.7742	1.5361	115	57.2609	64.0829	6.82208	122.449	120	-2.44898	115	60.4322	60.3853	-0.0469009	139.535	139.535	-4.63274e-12	115	50.9372	57.7791	6.84192	82.1918	81.0811	-1.1107
116	53.1461	60.4328	7.28663	100	100	-2.37321e-12	116	57.65	59.4592	1.80921	125	127.66	2.65957	116	60.3966	61.997	1.60039	136.364	136.364	0	116	50.3104	49.9696	-0.340749	81.0811	81.0811	0
117	54.3324	56.5189	2.18641	95.2381	95.2381	0	117	58.4462	61.0042	2.558	125	122.449	-2.55102	117	61.1608	63.2694	2.10852	146.341	142.857	-3.48432	117	49.5168	48.8605	-0.656295	72.2892	105.263	32.974
118	54.6762	61.3003	6.62414	98.3607	96.7742	-1.58646	118	58.3192	63.4154	5.09621	122.449	122.449	0	118	60.0332	61.3346	1.30137	139.535	139.535	-4.63274e-12	118	49.7199	51.8354	2.11556	82.1918	67.4157	-14.7761
119	54.1287	58.0482	3.91954	100	100	2.37321e-12	119	58.8093	61.6839	2.8746	125	127.66	2.65957	119	60.1214	61.443	1.32161	142.857	142.857	0	119	51.3641	45.6967	-5.66744	75	77.9221	2.92208
120	52.8798	59.2448	6.36498	100	101.695	1.69492	120	58.7317	62.4644	3.73271	122.449	120	-2.44898	120	59.9015	58.6738	-1.22765	142.857	142.857	0	120	50.4325	52.8831	2.45056	77.9221	77.9221	0
121	52.6693	56.034	3.36474	103.448	101.695	-1.75336	121	57.6678	61.986	4.31823	122.449	125	2.55102	121	60.338	66.2219	5.88392	136.364	136.364	0	121	51.3082	55.0891	3.78087	84.507	71.4286	-13.0785
122	55.8184	58.753	2.93461	101.695	101.695	2.44427e-12	122	59.5495	61.3705	1.82094	127.66	127.66	0	122	60.9755	63.1238	2.14828	136.364	136.364	4.40536e-12	122	50.0101	56.2023	6.19225	81.0811	78.9474	-2.13371
123	57.7005	61.6018	3.90122	105.263	103.448	-1.81488	123	58.735	54.5689	-4.16612	127.66	125	-2.65957	123	59.7138	63.9044	4.19059	139.535	139.535	-4.63274e-12	123	52.7776	52.8494	0.071859	81.0811	78.9474	-2.13371
124	59.003	61.3225	2.31951	103.448	105.263	1.81488	124	58.7478	62.6564	3.9086	127.66	125	-2.65957	124	60.0478	60.6872	0.639374	139.535	136.364	-3.17125	124	52.5625	51.8744	-0.688068	77.9221	103.448	25.5262
125	54.1719	56.861	2.68911	105.263	105.263	0	125	59.1767	65.7312	6.55447	127.66	130.435	2.77521	125	60.2945	62.3704	2.07595	136.364	139.535	3.17125	125	51.9643	56.2413	4.27702	84.507	67.4157	-17.0913
126	55.3231	58.0651	2.74196	105.263	105.263	0	126	59.6857	60.8039	1.11823	130.435	127.66	-2.77521	126	61.112	65.5057	4.39368	139.535	139.535	0	126	50.3686	51.0903	0.721752	76.9231	95.2381	18.315
127	55.6225	60.9653	5.34285	103.448	105.263	1.81488	127	60.1226	62.4248	2.30221	122.449	125	2.55102	127	60.7432	64.9601	4.21688	139.535	136.364	-3.17125	127	49.418	46.3731	-3.04482	76.9231	95.2381	18.315
128	55.4858	60.2351	4.74928	105.263	103.448	-1.81488	128	60.2378	66.9774	6.73957	125	122.449	-2.55102	128	61.0553	63.9298	2.87454	139.535	139.535	-4.63274e-12	128	50.8351	56.4327	5.59758	77.9221	64.5161	-13.4059
129	55.6186	58.5996	2.98098	105.263	105.263	0	129	59.2048	62.9359	3.73109	122.449	125	2.55102	129	61.4122	62.1374	0.725208	136.364	139.535	3.17125	129	48.7132	48.5588	-0.154427	77.9221	77.9221	2.8848e-12
130	57.0848	58.4857	1.40097	103.448	103.448	0	130	58.6651	60.3673	1.7022	125	122.449	-2.55102	130	61.2129	64.0632	2.85026	136.364	133.333	-3.0303	130	53.9369	51.6138	-2.32311	76.9231	90.9091	13.986
131	54.7538	60.8345	6.08066	105.263	105.263	-2.62901e-12	131	58.9067	64.8356	5.92888	122.449	122.449	0	131	61.4047	67.0207	5.61593	133.333	136.364	3.0303	131	53.1665	53.3258	0.159255	81.0811	75.9494	-5.13171
132	53.2001	55.853	2.65297	105.263	105.263	2.62901e-12	132	59.8601	62.6678	2.80775	120	122.449	2.44898	132	60.4329	61.921	1.48805	136.364	133.333	-3.0303	132	52.3544	53.5863	1.23184	77.9221	83.3333	5.41126
133	55.5349	58.4999	2.96498	101.695	101.695	0	133	59.3933	62.9841	3.59077	125	125	0	133	60.6813	63.2827	2.60136	133.333	136.364	3.0303	133	53.8728	55.9506	2.07783	76.9231	80	3.07692
134	54.443	58.2432	3.8002	103.448	105.263	1.81488	134	57.5443	62.4352	4.89085	122.449	122.449	0	134	59.7794	62.1408	2.36134	133.333	133.333	0	134	54.0826	56.8731	2.79054	76.9231	80	3.07692
135	53.9612	59.2247	5.26349	103.448	101.695	-1.75336	135	59.1514	61.9018	2.75041	122.449	120	-2.44898	135	59.8956	63.5463	3.65072	136.364	136.364	0	135	53.9503	54.5784	0.628074	81.0811	78.9474	-2.13371
136	56.5189	57.1632	0.644303	103.448	103.448	0	136	58.127	62.0258	3.89873	120	122.449	2.44898	136	60.972	65.7143	4.74226	136.364	136.364	4.40536e-12	136	52.6278	60.7254	8.09758	83.3333	82.1918	-1.14155
137	57.8241	60.7622	2.9381	100	100	-2.37321e-12	137	58.2084	62.6783	4.46994	122.449	120	-2.44898	137	60.044	62.4355	2.39142	136.364	136.364	-4.40536e-12	137	49.433	45.8093	-3.62366	75.9494	105.263	29.3138
138	56.286	60.7304	4.44446	101.695	103.448	1.75336	138	58.8399	61.848	3.00816	120	120	0	138	59.4185	59.6228	0.204295	142.857	142.857	4.86011e-12	138	52.9207	55.9928	3.07211
139	55.3594	58.2646	2.90519	100	98.3607	-1.63934	139	58.0726	62.5318	4.45914	125	127.66	2.65957	139	59.578	64.5664	4.98833	136.364	136.364	-4.40536e-12	139	55.1434	52.0511	-3.09224
140	58.3376	62.3524	4.0148	98.3607	100	1.63934	140	57.9069	60.6898	2.78285	122.449	120	-2.44898	140	59.5511	62.1364	2.58526	139.535	139.535	0	140	56.8267	58.1921	1.36547	73.1707	61.8557	-11.3151
141	56.9719	62.9112	5.93932	98.3607	96.7742	-1.58646	141	60.4424	62.8686	2.42618	117.647	117.647	-3.28271e-12	141	60.2101	60.8772	0.667081	139.535	136.364	-3.17125	141	56.1072	57.5181	1.41083	73.1707	61.8557	-11.3151
142	56.1444	59.3916	3.24711	98.3607	100	1.63934	142	58.34	64.822	6.48201	117.647	120	2.35294	142	60.4986	61.7698	1.27126	142.857	146.341	3.48432	142	57.5256	57.7956	0.270065	75.9494	76.9231	0.97371
143	55.3927	59.651	4.25831	96.7742	96.7742	-2.21689e-12	143	58.0248	60.6949	2.67007	122.449	120	-2.44898	143	60.3396	60.5295	0.189935	136.364	136.364	0	143	57.84	55.7199	-2.12005	75	85.7143	10.7143
144	57.073	61.5852	4.51223	98.3607	98.3607	0	144	56.9589	61.46	4.50107	122.449	125	2.55102	144	59.8782	63.874	3.99579	139.535	139.535	0	144	56.0719	57.2965	1.22459	74.0741	63.1579	-10.9162
145	59.2601	62.0228	2.76263	100	98.3607	-1.63934	145	58.0773	62.7401	4.66276	122.449	120	-2.44898	145	59.6166	63.3479	3.73135	139.535	139.535	0	145	53.2576	50.8913	-2.36624
146	58.4049	65.0046	6.59968	101.695	101.695	0	146	56.217	60.4085	4.19147	120	122.449	2.44898	146	60.8617	62.6125	1.75076	139.535	139.535	0	146	47.0773	48.3062	1.22886	74.0741	65.9341	-8.14001
147	58.1277	61.9225	3.79479	101.695	101.695	0	147	55.7141	58.9482	3.23407	120	120	0	147	60.6221	61.747	1.1249	139.535	142.857	3.32226	147	49.2353	49.4149	0.179622	74.0741	65.9341	-8.14001
148	57.6946	62.2611	4.56643	100	101.695	1.69492	148	56.3183	60.1874	3.86913	122.449	122.449	-3.55271e-12	148	60.3224	58.7474	-1.57505	139.535	142.857	3.32226	148	49.7065	48.3767	-1.32975	76.9231	76.9231	0
149	56.9818	60.575	3.59324	101.695	100	-1.69492	149	55.8733	59.9547	4.08132	120	117.647	-2.35294	149	59.7809	66.6206	6.83974	139.535	136.364	-3.17125	149	48.978	51.7106	2.73259	72.2892	74.0741	1.78492
150	57.5128	61.6733	4.16059	100	100	-4.74643e-12	150	58.9481	61.0244	2.07624	122.449	125	2.55102	150	60.5307	64.1022	3.57152	139.535	142.857	3.32226	150	48.8967	50.1241	1.22744
151	56.8011	60.6099	3.80876	100	100	4.74643e-12	151	59.1744	56.9101	-2.26422	122.449	122.449	0	151	60.5537	61.4218	0.868027	142.857	142.857	0	151	51.5888	52.5276	0.938821
152	55.9658	63.2115	7.24571	107.143	105.263	-1.8797	152	57.9744	63.9063	5.93184	122.449	122.449	0	152	60.3505	61.5263	1.17587	139.535	139.535	0	152	54.3355	48.0976	-6.23791	76.9231	75	-1.92308
153	56.6288	55.9619	-0.666835	100	100	0	153	57.9486	63.7793	5.83062	117.647	120	2.35294	153	59.7622	64.1666	4.40447	142.857	139.535	-3.32226	153	52.636	56.309	3.67296	76.9231	75	-1.92308
154	54.6036	57.2633	2.65973	100	100	0	154	59.3158	62.6335	3.31771	122.449	117.647	-4.80192	154	60.857	62.1704	1.31337	139.535	139.535	4.63274e-12	154	50.9638	50.0684	-0.895402	78.9474	73.1707	-5.77664
155	53.9896	56.2567	2.26712	96.7742	95.2381	-1.5361	155	58.7055	63.8562	5.15067	120	120	0	155	60.291	64.4196	4.1286	136.364	139.535	3.17125	155	48.9297	51.6677	2.738	76.9231	77.9221	0.999001
156	49.5016	53.8654	4.36377	103.448	105.263	1.81488	156	58.2453	63.427	5.18171	120	122.449	2.44898	156	60.8945	63.4592	2.56475	133.333	133.333	0	156	49.4121	51.4305	2.01831	75.9494	72.2892	-3.66021
157	53.6157	51.6598	-1.95594	103.448	101.695	-1.75336	157	57.915	63.6098	5.69485	122.449	120	-2.44898	157	60.9636	64.7246	3.76106	136.364	133.333	-3.0303	157	42.6305	51.9449	9.31438	81.0811	82.1918	1.1107
158	52.8871	60.338	7.45088	101.695	103.448	1.75336	158	59.0691	62.427	3.35791	117.647	120	2.35294	158	60.3674	63.2791	2.91168	136.364	139.535	3.17125	158	47.9824	52.2569	4.27447	81.0811	82.1918	1.1107
159	51.7839	55.4876	3.70379	98.3607	98.3607	0	159	58.6336	63.1577	4.52409	122.449	120	-2.44898	159	60.739	64.128	3.38899	142.857	139.535	-3.32226	159	45.892	48.5593	2.66736	85.7143	84.507	-1.20724
160	53.2282	53.6026	0.374397	103.448	103.448	0	160	59.5381	63.5233	3.98518	117.647	120	2.35294	160	60.1658	63.5827	3.41695	136.364	139.535	3.17125	160	50.6066	52.4163	1.80966	84.507	83.3333	-1.17371
161	54.2294	58.7513	4.52191	100	98.3607	-1.63934	161	60.2805	66.9453	6.66477	120	120	0	161	60.2667	62.6378	2.37103	142.857	142.857	0	161	44.5194	49.5863	5.06691	82.1918	83.3333	1.14155
162	54.7713	56.6366	1.86524	98.3607	98.3607	4.59011e-12	162	59.6883	65.2895	5.60125	122.449	122.449	-3.55271e-12	162	60.0688	62.4177	2.34884	139.535	139.535	0	162	46.1547	43.4359	-2.71881	78.9474	101.695	22.7475
163	53.395	57.7297	4.33472	101.695	101.695	0	163	59.6838	63.3913	3.7075	117.647	117.647	3.28271e-12	163	61.4252	65.772	4.34689	142.857	139.535	-3.32226	163	44.923	45.6865	0.763491	81.0811	74.0741	-7.00701
164	51.2551	54.3908	3.13577	100	100	0	164	58.9166	62.9103	3.99363	120	120	0	164	61.2191	66.1592	4.94013	136.364	136.364	4.40536e-12	164	43.5951	45.8655	2.27046	77.9221	70.5882	-7.33384
165	51.8827	56.3823	4.49962	101.695	101.695	0	165	57.6707	63.5409	5.87012	120	120	0	165	60.005	61.4627	1.45764	136.364	136.364	0	165	37.8645	45.0957	7.23123	77.9221	78.9474	1.02529
166	52.0954	55.3308	3.23532	103.448	105.263	1.81488	166	60.2654	61.9778	1.71239	120	120	0	166	59.6618	63.9658	4.30403	139.535	139.535	-4.63274e-12	166	43.7591	42.3745	-1.38464	81.0811	90.9091	9.82801
167	52.2791	54.302	2.02297	101.695	101.695	0	167	57.9747	63.9944	6.0197	120	120	0	167	58.721	63.1174	4.3964	139.535	142.857	3.32226	167	46.2403	42.1232	-4.11712	77.9221	86.9565	9.03444
168	50.2289	51.7035	1.4746	98.3607	98.3607	0	168	59.3472	62.524	3.17679	117.647	117.647	0	168	60.0169	62.309	2.29213	136.364	136.364	0	168	42.3852	48.7041	6.3189	77.9221	64.5161	-13.4059
169	51.5452	56.7191	5.17385	103.448	101.695	-1.75336	169	59.1052	64.766	5.66083	117.647	117.647	0	169	60.6531	61.6568	1.00371	133.333	133.333	4.20641e-12	169	44.163	50.0308	5.86786
170	51.3747	53.5202	2.14552	103.448	103.448	5.07328e-12	170	58.5473	62.5845	4.03716	125	122.449	-2.55102	170	59.6924	65.2951	5.6027	136.364	136.364	-4.40536e-12	170	42.5009	44.9456	2.44473	80	89.5522	9.55224
171	51.8677	55.0939	3.22617	100	101.695	1.69492	171	59.534	62.1611	2.62703	117.647	120	2.35294	171	60.1939	61.8673	1.67332	136.364	136.364	0	171	48.3083	44.6799	-3.62845	80	89.5522	9.55224
172	51.1172	56.376	5.25878	101.695	101.695	0	172	58.0983	61.7342	3.63594	120	122.449	2.44898	172	59.6369	62.2509	2.61395	136.364	136.364	0	172	47.1017	47.8144	0.712741	80	80	0
173	48.993	52.3174	3.32443	101.695	100	-1.69492	173	58.8516	62.3016	3.44991	125	122.449	-2.55102	173	59.9738	62.7086	2.73473	133.333	133.333	0	173	44.7024	45.3326	0.630271	78.9474	80	1.05263
174	51.0071	51.8262	0.819142	100	103.448	3.44828	174	58.6997	62.7347	4.03495	120	120	0	174	59.5755	60.8324	1.25695	139.535	139.535	0	174	43.1723	44.6582	1.48591	77.9221	88.2353	10.3132
175	51.0531	57.1097	6.05651	101.695	101.695	0	175	59.5772	63.3252	3.74803	115.385	115.385	0	175	54.0847	52.3944	-1.6903	133.333	133.333	0	175	44.5921	43.2245	-1.36756	77.9221	88.2353	10.3132
176	49.2644	47.1989	-2.06557	100	96.7742	-3.22581	176	59.7384	65.2956	5.55722	122.449	120	-2.44898	176	56.8713	51.1899	-5.68137	133.333	133.333	0	176	50.6802	47.6677	-3.0125	75	75	-2.67164e-12
177	49.8159	56.3185	6.50257	100	101.695	1.69492	177	57.9348	63.4451	5.51025	120	122.449	2.44898	177	57.5853	66.8242	9.2389	139.535	139.535	0	177	48.7696	43.0901	-5.6795
178	52.1357	54.0925	1.95673	103.448	103.448	0	178	56.5133	59.1095	2.59621	125	125	7.40386e-12	178	56.4951	58.7562	2.26113	136.364	139.535	3.17125	178	57.3465	51.9655	-5.38102	86.9565	86.9565	0
179	51.5242	56.3607	4.83651	101.695	103.448	1.75336	179	55.7806	61.0809	5.30033	122.449	125	2.55102	179	56.7317	51.8086	-4.92319	136.364	136.364	-4.40536e-12	179	59.6732	74.1143	14.4411	86.9565	86.9565	0
180	51.2003	57.5712	6.37087	103.448	101.695	-1.75336	180	53.9506	47.4856	-6.46501	122.449	125	2.55102	180	58.4162	68.2808	9.86464	139.535	136.364	-3.17125	180	58.7158	58.9632	0.247459	88.2353	88.2353	0
181	52.7177	52.5455	-0.172242	95.2381	93.75	-1.4881	181	50.0763	60.3154	10.2391	122.449	120	-2.44898	181	58.0906	62.8394	4.74885	136.364	139.535	3.17125	181	56.3254	60.8686	4.54316	83.3333	83.3333	0
182	51.339	58.2671	6.92812	95.2381	93.75	-1.4881	182	50.7485	47.4491	-3.29935	125	127.66	2.65957	182	56.3681	49.5188	-6.84927	139.535	139.535	0	182	52.7603	49.0801	-3.68016	76.9231	107.143	30.2198
183	52.3418	55.1397	2.79788	92.3077	90.9091	-1.3986	183	51.236	56.699	5.46293	117.647	115.385	-2.26244	183	56.1661	62.1998	6.03366	136.364	133.333	-3.0303	183	55.2138	60.0477	4.83389	78.9474	109.091	30.1435
184	53.1498	54.169	1.01913	101.695	101.695	0	184	51.9165	53.6112	1.69469	120	120	0	184	57.8239	64.0041	6.18021	133.333	136.364	3.0303	184	53.3185	47.7026	-5.61583	78.9474	109.091	30.1435
185	50.1716	56.1278	5.95615	93.75	96.7742	3.02419	185	51.3325	52.8925	1.56002	120	122.449	2.44898	185	57.2551	56.8505	-0.404594	142.857	139.535	-3.32226	185	53.4994	50.2108	-3.28862	78.9474	75.9494	-2.998
186	49.322	50.4471	1.12508	95.2381	98.3607	3.12256	186	50.6728	55.0484	4.37568	120	122.449	2.44898	186	56.6138	58.3213	1.70741	133.333	133.333	0	186	55.5428	57.941	2.3982	80	65.2174	-14.7826
187	46.9395	53.4257	6.48621	98.3607	95.2381	-3.12256	187	53.6974	54.9849	1.28754	122.449	120	-2.44898	187	52.1473	54.5208	2.37355	136.364	136.364	0	187	56.7902	61.1336	4.34335	77.9221	105.263	27.3411
188	48.6932	52.2199	3.52678	93.75	95.2381	1.4881	188	53.7271	51.8679	-1.85912	115.385	117.647	2.26244	188	53.722	56.8453	3.12325	142.857	142.857	0	188	54.5807	50.8193	-3.76135	77.9221	105.263	27.3411
189	50.9559	52.4213	1.46544	95.2381	90.9091	-4.329	189	53.3581	54.6461	1.28804	117.647	115.385	-2.26244	189	55.875	59.0658	3.19081	139.535	139.535	0	189	54.218	61.0675	6.84947	84.507	84.507	0
190	53.7402	55.6516	1.91137	100	101.695	1.69492	190	53.8196	57.8454	4.02578	120	120	0	190	55.8661	64.3129	8.44684	142.857	142.857	0	190	56.0409	59.5076	3.46678	84.507	84.507	0
191	49.9521	55.0118	5.05974	96.7742	100	3.22581	191	51.1877	56.5719	5.38418	113.208	113.208	0	191	57.3891	50.6187	-6.77044	142.857	146.341	3.48432	191	56.1476	59.7608	3.61315	83.3333	83.3333	0
192	50.1709	51.4982	1.32725	105.263	98.3607	-6.9025	192	49.4668	52.9597	3.49286	109.091	109.091	0	192	58.9752	69.3469	10.3717	133.333	127.66	-5.67376	192	56.5961	59.0647	2.46851	81.0811	81.0811	0
193	49.2288	53.4104	4.18164	93.75	96.7742	3.02419	193	49.2717	55.3862	6.11452	115.385	113.208	-2.17707	193	56.7094	64.3402	7.63079	139.535	142.857	3.32226	193	55.3039	60.2806	4.97671	80	81.0811	1.08108
194	44.6195	50.6646	6.04513	95.2381	98.3607	3.12256	194	47.8798	53.2867	5.40694	113.208	115.385	2.17707	194	56.7106	48.1403	-8.57037	139.535	139.535	0	194	56.0716	51.5176	-4.554	78.9474	105.263	26.3158
195	46.8178	49.2328	2.41507	98.3607	100	1.63934	195	53.8689	52.3699	-1.49908	113.208	113.208	0	195	58.691	65.9299	7.23891	133.333	133.333	0	195	54.1228	52.3692	-1.75356	76.9231	77.9221	0.999001
196	46.486	49.4545	2.96846	98.3607	98.3607	4.59011e-12	196	48.5494	57.6836	9.13422	115.385	115.385	6.30962e-12	196	58.9014	62.8187	3.91733	136.364	136.364	0	196	54.8582	51.6134	-3.24471	77.9221	71.4286	-6.49351
197	48.1308	49.1963	1.06543	95.2381	95.2381	0	197	49.745	48.5119	-1.23303	117.647	115.385	-2.26244	197	58.5521	56.2475	-2.30458	142.857	142.857	0	197	56.3705	60.163	3.79252	81.0811	68.9655	-12.1156
198	43.8391	50.7171	6.87799	93.75	95.2381	1.4881	198	50.4403	52.0495	1.60919	117.647	120	2.35294	198	57.2618	57.288	0.0262236	136.364	139.535	3.17125	198	57.9504	64.4378	6.48742	83.3333	83.3333	-6.57963e-12
199	49.3669	49.244	-0.122915	96.7742	95.2381	-1.5361	199	50.8908	56.0042	5.1134	117.647	117.647	6.5512e-12	199	57.4907	60.545	3.05429	133.333	133.333	0	199	58.4379	51.2419	-7.19608	77.9221	107.143	29.2208
200	50.8653	53.2162	2.35088	95.2381	92.3077	-2.9304	200	50.6143	55.2261	4.6118	117.647	115.385	-2.26244	200	58.784	72.1257	13.3416	133.333	130.435	-2.89855	200	56.5914	57.3595	0.768067	77.9221	72.2892	-5.63292
201	47.7091	51.0043	3.29522	92.3077	93.75	1.44231	201	48.0794	49.3626	1.28325	115.385	120	4.61538	201	57.4631	47.594	-9.86912	139.535	142.857	3.32226	201	57.752	58.4593	0.70723	88.2353	88.2353	0
202	49.5888	52.1361	2.54732	93.75	93.75	4.16378e-12	202	48.534	51.7042	3.17023	117.647	115.385	-2.26244	202	60.9348	60.6333	-0.301577	136.364	130.435	-5.92885	202	55.9409	64.6696	8.72871	88.2353	88.2353	0
203	48.7444	52.4968	3.75231	93.75	95.2381	1.4881	203	51.9865	52.9423	0.955823	115.385	115.385	0	203	60.6342	74.6389	14.0047	125	127.66	2.65957	203	57.7339	60.3781	2.64426	83.3333	83.3333	0
204	45.4986	48.0231	2.52447	89.5522	93.75	4.19776	204	51.517	55.7852	4.26824	117.647	115.385	-2.26244	204	56.8887	44.0015	-12.8872	125	127.66	2.65957	204	58.6143	64.4456	5.83135	83.3333	83.3333	0
205	47.0603	50.8668	3.80654	100	92.3077	-7.69231	205	53.243	53.9418	0.69883	115.385	120	4.61538	205	53.8413	55.8117	1.97045	146.341	142.857	-3.48432	205	56.9769	59.5523	2.57535	83.3333	84.507	1.17371
206	49.6395	46.6441	-2.99535	88.2353	98.3607	10.1254	206	52.8453	57.003	4.15768	122.449	117.647	-4.80192	206	58.8793	76.831	17.9517	136.364	136.364	0	206	57.9656	63.3868	5.42116	83.3333	83.3333	-6.57963e-12
207	46.2724	53.7429	7.4705	93.75	86.9565	-6.79348	207	54.4279	50.9075	-3.52035	117.647	117.647	6.5512e-12	207	58.6137	67.4377	8.82401	139.535	139.535	0	207	59.1867	53.4376	-5.74911	80	103.448	23.4483
208	47.1479	45.6717	-1.47616	85.7143	85.7143	0	208	51.121	52.0055	0.884574	117.647	117.647	6.5512e-12	208	57.9467	52.5162	-5.43055	136.364	139.535	3.17125	208	56.4648	64.5973	8.13253	80	65.2174	-14.7826
209	47.9462	45.1366	-2.80962	92.3077	92.3077	-4.03588e-12	209	50.4565	60.6028	10.1463	122.449	120	-2.44898	209	60.0351	60.186	0.150914	146.341	139.535	-6.80658	209	57.1486	53.4641	-3.68457	78.9474	101.695	22.7475
210	45.3206	52.6584	7.33777	92.3077	92.3077	-4.03588e-12	210	56.7632	52.8105	-3.9527	122.449	125	2.55102	210	59.1212	66.2219	7.10063	136.364	139.535	3.17125	210	55.8086	60.4975	4.68882	81.0811	65.2174	-15.8637
211	47.3804	48.8397	1.4593	96.7742	98.3607	1.58646	211	54.3335	61.5777	7.24415	122.449	117.647	-4.80192	211	58.7767	62.48	3.70331	136.364	139.535	3.17125	211	57.2068	63.5775	6.37079	81.0811	82.1918	1.1107
212	47.4919	49.4147	1.92279	96.7742	96.7742	0	212	54.4637	55.9185	1.45484	127.66	130.435	2.77521	212	60.7403	76.1164	15.376	142.857	136.364	-6.49351	212	55.804	59.6688	3.86484	83.3333	82.1918	-1.14155
213	50.3693	51.4091	1.0398	96.7742	93.75	-3.02419	213	55.9149	60.73	4.81512	125	125	0	213	57.7384	55.281	-2.4574	133.333	139.535	6.20155	213	53.3132	59.6988	6.38554	81.0811	82.1918	1.1107
214	46.5641	53.0633	6.4992	101.695	100	-1.69492	214	56.1197	55.2765	-0.84324	117.647	120	2.35294	214	60.0658	61.3943	1.32848	136.364	130.435	-5.92885	214	52.8414	56.6345	3.79315	78.9474	80	1.05263
215	47.7625	46.4331	-1.32945	90.9091	93.75	2.84091	215	56.8118	65.1045	8.2927	122.449	117.647	-4.80192	215	60.6517	70.9712	10.3195	136.364	139.535	3.17125	215	55.2349	51.4767	-3.75817	80	103.448	23.4483
216	46.8503	50.3587	3.50839	96.7742	95.2381	-1.5361	216	54.457	54.851	0.394013	125	130.435	5.43478	216	61.2353	60.6563	-0.578933	136.364	136.364	0	216	54.1522	52.3881	-1.7641	78.9474	78.9474	0
217	41.3125	49.7748	8.46228	96.7742	98.3607	1.58646	217	58.7196	56.5542	-2.16548	125	122.449	-2.55102	217	58.3666	62.2844	3.91775	146.341	142.857	-3.48432	217	53.4182	49.9655	-3.45263	76.9231	81.0811	4.158
218	46.9556	46.9215	-0.0340859	101.695	98.3607	-3.33426	218	57.2522	64.9818	7.72962	125	125	0	218	57.6226	61.4085	3.78591	133.333	139.535	6.20155	218	56.8998	53.6736	-3.22622	78.9474	74.0741	-4.87329
219	42.5991	47.5063	4.90718	92.3077	98.3607	6.05296	219	58.5605	61.4333	2.87278	122.449	122.449	0	219	61.3581	57.4824	-3.87576	130.435	127.66	-2.77521	219	56.2248	54.3568	-1.86794	75	78.9474	3.94737
220	45.0034	47.7401	2.73664	95.2381	90.9091	-4.329	220	56.395	59.3247	2.9296	117.647	120	2.35294	220	61.2876	65.4512	4.16358	130.435	130.435	0	220	53.1613	61.3862	8.2249	83.3333	82.1918	-1.14155
221	48.6867	49.0335	0.346878	90.9091	90.9091	0	221	57.2474	61.5855	4.33811	122.449	117.647	-4.80192	221	57.0968	76.8117	19.7149	136.364	133.333	-3.0303	221	54.8511	55.6822	0.831105	83.3333	82.1918	-1.14155
222	46.4909	51.3334	4.8425	92.3077	92.3077	-4.03588e-12	222	57.5278	56.3555	-1.17225	117.647	122.449	4.80192	222	58.6331	39.384	-19.2491	136.364	142.857	6.49351	222	58.0008	63.107	5.10624	81.0811	81.0811	0
223	44.7379	49.6038	4.86597	93.75	95.2381	1.4881	223	54.8155	62.0834	7.26794	122.449	120	-2.44898	223	60.5405	66.1444	5.60391	133.333	130.435	-2.89855	223	57.724	62.2008	4.47685	82.1918	83.3333	1.14155
224	47.843	47.3141	-0.528839	86.9565	88.2353	1.27877	224	57.3401	59.8997	2.5596	120	122.449	2.44898	224	60.8757	89.0841	28.2085	133.333	130.435	-2.89855	224	58.0425	60.9289	2.88644	83.3333	83.3333	6.57963e-12
225	44.5118	48.9082	4.39637	84.507	85.7143	1.20724	225	54.2394	58.0725	3.83304	120	120	0	225	60.0754	40.2047	-19.8706	127.66	136.364	8.70406	225	58.5975	60.7671	2.16963	81.0811	81.0811	-6.22435e-12
226	45.4438	48.3122	2.86843	93.75	89.5522	-4.19776	226	53.4268	53.8339	0.407146	120	120	0	226	60.1518	78.4868	18.335	133.333	127.66	-5.67376	226	59.3169	63.4005	4.08357	82.1918	82.1918	0
227	46.5206	48.9922	2.47162	93.75	92.3077	-1.44231	227	47.2229	56.4208	9.19793	120	120	0	227	60.3262	64.8271	4.50088	130.435	130.435	0	227	56.7881	59.276	2.48794	81.0811	81.0811	0
228	40.565	47.0968	6.53184	88.2353	95.2381	7.0028	228	53.0948	51.6376	-1.45719	120	120	0	228	59.8988	51.7762	-8.12262	136.364	139.535	3.17125	228	56.5015	57.0941	0.592556	84.507	88.2353	3.72825
229	49.8313	48.68	-1.15138	93.75	86.9565	-6.79348	229	55.2856	61.3911	6.1055	117.647	115.385	-2.26244	229	57.9091	70.6593	12.7502	133.333	130.435	-2.89855	229	55.7359	63.4307	7.69476	84.507	88.2353	3.72825
230	50.5869	54.0524	3.46552	92.3077	93.75	1.44231	230	57.0038	56.3378	-0.666075	122.449	125	2.55102	230	61.2177	63.8322	2.61445	133.333	133.333	0	230	57.0011	56.0043	-0.996797	80	78.9474	-1.05263
231	44.1783	50.8444	6.66605	92.3077	93.75	1.44231	231	51.8061	56.4028	4.59671	111.111	111.111	-5.85487e-12	231	58.5949	59.1658	0.57084	146.341	142.857	-3.48432	231	57.7855	53.3459	-4.43962	75	103.448	28.4483
232	47.7756	48.9235	1.14795	92.3077	90.9091	-1.3986	232	53.5084	60.8799	7.37149	117.647	115.385	-2.26244	232	57.7676	36.1372	-21.6304	146.341	142.857	-3.48432	232	59.5847	56.0068	-3.57796
233	44.2663	48.5742	4.30788	88.2353	89.5522	1.31694	233	55.1311	54.4361	-0.695005	122.449	122.449	-7.10543e-12	233	57.472	81.6705	24.1985	139.535	136.364	-3.17125	233	57.2843	62.636	5.35171	83.3333	83.3333	0
234	42.6696	45.9061	3.23657	88.2353	89.5522	1.31694	234	55.0449	64.6451	9.60019	109.091	109.091	0	234	59.5246	73.0787	13.554	139.535	142.857	3.32226	234	53.2979	61.0082	7.71027	83.3333	83.3333	0
235	44.5186	46.6936	2.17499	85.7143	85.7143	0	235	55.0152	48.0901	-6.92511	117.647	117.647	6.5512e-12	235	60.7797	43.1802	-17.5995	136.364	139.535	3.17125	235	54.0542	55.3597	1.30546	82.1918	83.3333	1.14155
236	50.299	48.7871	-1.51185	84.507	83.3333	-1.17371	236	54.9929	56.3906	1.39777	117.647	117.647	6.5512e-12	236	59.5751	71.5359	11.9608	136.364	133.333	-3.0303	236	56.5013	59.0082	2.50686	78.9474	77.9221	-1.02529
237	57.9241	57.377	-0.547074	96.7742	95.2381	-1.5361	237	55.731	62.4001	6.66912	120	120	0	237	60.5372	62.8733	2.33613	133.333	136.364	3.0303	237	54.2776	59.3116	5.03404	81.0811	82.1918	1.1107
238	57.001	64.7475	7.74649	96.7742	95.2381	-1.5361	238	50.3817	54.2173	3.83563	117.647	120	2.35294	238	58.4889	58.3298	-0.159047	130.435	130.435	-8.07177e-12	238	54.8954	59.8025	4.9071	81.0811	80	-1.08108
239	55.5707	55.2453	-0.325396	98.3607	100	1.63934	239	51.392	52.3978	1.00588	117.647	115.385	-2.26244	239	59.718	59.6535	-0.0645112	136.364	136.364	0	239	55.6625	50.5738	-5.08869	77.9221	103.448	25.5262
240	55.4956	58.973	3.47735	95.2381	95.2381	0	240	49.6806	55.5983	5.91773	115.385	117.647	2.26244	240	59.9614	67.2672	7.30579	133.333	133.333	8.41283e-12	240	54.6279	53.2732	-1.35465	75.9494	76.9231	0.97371
241	54.4028	56.5239	2.12103	93.75	92.3077	-1.44231	241	48.7525	57.0946	8.34215	117.647	117.647	-6.5512e-12	241	57.5658	62.9718	5.40591	142.857	139.535	-3.32226	241	52.3661	59.992	7.62596	82.1918	65.2174	-16.9744
242	57.3482	59.0663	1.7181	92.3077	93.75	1.44231	242	50.5772	53.8008	3.2236	115.385	115.385	6.30962e-12	242	58.7881	45.4909	-13.2972	139.535	146.341	6.80658	242	55.2025	57.7245	2.52202	82.1918	82.1918	0
243	55.5664	58.334	2.76756	98.3607	96.7742	-1.58646	243	51.798	54.3857	2.58767	117.647	117.647	-6.5512e-12	243	59.6264	82.6215	22.9951	133.333	127.66	-5.67376	243	57.4721	60.0008	2.52865	80	78.9474	-1.05263
244	56.0761	56.9325	0.856384	92.3077	93.75	1.44231	244	53.3845	59.8754	6.49086	120	117.647	-2.35294	244	59.3099	55.7877	-3.52218	130.435	133.333	2.89855	244	54.5688	52.7242	-1.84462	75.9494	103.448	27.4989
245	53.5347	55.4227	1.88799	92.3077	90.9091	-1.3986	245	52.4326	55.6202	3.18764	120	120	0	245	57.2967	56.6542	-0.642474	130.435	130.435	0	245	55.8687	53.9464	-1.92221	75	74.0741	-0.925926
246	51.4729	55.6974	4.2245	93.75	93.75	0	246	47.328	53.3878	6.05977	115.385	117.647	2.26244	246	57.9925	63.291	5.29855	133.333	130.435	-2.89855	246	57.4939	53.4566	-4.03731	76.9231	75.9494	-0.97371
247	50.0926	51.6226	1.52997	92.3077	95.2381	2.9304	247	49.936	48.1978	-1.73815	120	120	0	247	59.2158	67.2803	8.06444	133.333	136.364	3.0303	247	58.02	56.9587	-1.06125	77.9221	77.9221	0
248	49.9658	50.739	0.773163	89.5522	92.3077	2.75545	248	46.2367	52.1862	5.94944	113.208	113.208	0	248	61.0283	59.9374	-1.09089	133.333	133.333	-8.41283e-12	248	54.8132	54.1009	-0.712255	75.9494	76.9231	0.97371
249	50.7357	51.8703	1.13463	88.2353	86.9565	-1.27877	249	51.2169	51.2795	0.0626038	127.66	127.66	0	249	59.4929	60.7558	1.26295	133.333	133.333	0	249	56.0381	62.4762	6.43817	82.1918	63.8298	-18.362
250	52.3742	53.5996	1.22546	92.3077	88.2353	-4.0724	250	48.8301	53.0174	4.18731	115.385	115.385	0	250	57.7223	58.3467	0.624444	133.333	133.333	0	250	54.161	59.1035	4.9425	86.9565	85.7143	-1.24224
251	53.2938	54.6495	1.35568	93.75	95.2381	1.4881	251	50.8356	50.4646	-0.37099	115.385	113.208	-2.17707	251	60.6371	63.549	2.91189	139.535	136.364	-3.17125	251	56.0232	60.2049	4.18162	86.9565	85.7143	-1.24224
252	51.979	55.4039	3.42487	93.75	93.75	4.16378e-12	252	54.9334	56.0249	1.0915	115.385	117.647	2.26244	252	61.0276	68.0005	6.97283	130.435	133.333	2.89855	252	55.5546	59.8588	4.30418	84.507	84.507	0
253	51.3914	51.4323	0.0408956	93.75	93.75	-4.16378e-12	253	58.7933	59.9588	1.16541	113.208	113.208	0	253	59.0834	56.7779	-2.30551	130.435	127.66	-2.77521	253	53.2254	56.8889	3.66351	83.3333	85.7143	2.38095
254	51.2473	51.8747	0.627388	88.2353	92.3077	4.0724	254	58.0563	64.4513	6.39498	109.091	109.091	-5.64171e-12	254	59.1416	59.7711	0.629497	136.364	139.535	3.17125	254	53.5593	56.614	3.05471	81.0811	80	-1.08108
255	51.5585	53.4291	1.87066	93.75	89.5522	-4.19776	255	57.0307	56.1916	-0.839098	107.143	107.143	0	255	60.2363	68.5887	8.35233	127.66	125	-2.65957	255	54.1037	58.7153	4.61152	81.0811	81.0811	0
256	51.5345	51.8114	0.27686	89.5522	88.2353	-1.31694	256	56.9478	63.6812	6.73344	115.385	113.208	-2.17707	256	60.1729	64.4954	4.32245	139.535	139.535	0	256	54.8848	59.7656	4.88078	83.3333	82.1918	-1.14155
257	51.6281	53.6206	1.99246	93.75	93.75	0	257	57.3957	58.345	0.949286	115.385	117.647	2.26244	257	60.5695	63.3969	2.82738	133.333	136.364	3.0303	257	54.2326	59.7728	5.54016	82.1918	82.1918	6.4091e-12
258	52.1723	53.5114	1.33914	89.5522	89.5522	0	258	57.5432	63.4506	5.90736	109.091	107.143	-1.94805	258	61.7691	61.5029	-0.266226	130.435	130.435	0	258	55.0951	61.0411	5.94596	85.7143	86.9565	1.24224
259	52.542	54.8439	2.30196	90.9091	92.3077	1.3986	259	56.3241	60.2318	3.90766	111.111	113.208	2.09644	259	60.7818	63.9415	3.15965	146.341	142.857	-3.48432	259	54.4993	58.4735	3.9742	85.7143	84.507	-1.20724
260	44.9643	50.2944	5.33009	90.9091	92.3077	1.3986	260	55.8379	59.277	3.43913	111.111	111.111	0	260	59.505	51.4634	-8.04164	146.341	142.857	-3.48432	260	52.8928	58.4458	5.55301	84.507	84.507	0
261	51.4806	51.7018	0.221192	92.3077	89.5522	-2.75545	261	59.6453	62.2447	2.59937	115.385	115.385	-6.30962e-12	261	60.6535	75.7129	15.0593	133.333	133.333	0	261	53.1402	58.6414	5.50127	85.7143	85.7143	0
262	48.7636	51.3053	2.54169	92.3077	93.75	1.44231	262	60.5849	69.6128	9.02796	109.091	109.091	5.64171e-12	262	60.8635	65.799	4.9355	142.857	142.857	0	262	57.5776	56.5627	-1.01486	82.1918	82.1918	0
263	53.6473	51.2097	-2.43766	89.5522	88.2353	-1.31694	263	59.6112	55.2027	-4.40854	120	120	0	263	60.1568	67.2562	7.09943	136.364	139.535	3.17125	263	55.9191	61.7823	5.86318	83.3333	84.507	1.17371
264	57.8512	54.776	-3.07522	83.3333	89.5522	6.21891	264	57.3557	64.1244	6.76866	120	120	0	264	60.6742	57.9203	-2.75395	139.535	136.364	-3.17125	264	55.3771	59.0737	3.69664	82.1918	82.1918	-6.4091e-12
265	52.4257	53.5963	1.17065	107.143	105.263	-1.8797	265	58.3763	62.533	4.15675	115.385	113.208	-2.17707	265	59.0371	62.0213	2.98421	130.435	133.333	2.89855	265	54.8703	59.2322	4.3619	83.3333	82.1918	-1.14155
266	57.06	61.5291	4.46912	107.143	105.263	-1.8797	266	58.0415	58.4627	0.421206	122.449	125	2.55102	266	58.159	66.6944	8.53543	139.535	139.535	9.23706e-12	266	54.1435	58.5116	4.36817	82.1918	84.507	2.31526
267	57.8856	65.8357	7.95008	107.143	107.143	0	267	57.1788	62.1321	4.9533	120	120	0	267	58.0837	62.2291	4.14539	133.333	133.333	-8.41283e-12	267	51.8283	56.4788	4.6505	82.1918	82.1918	-6.4091e-12
268	57.6789	59.2234	1.54456	105.263	105.263	0	268	54.0007	56.6513	2.65059	117.647	115.385	-2.26244	268	59.7125	58.7854	-0.927084	136.364	136.364	0	268	55.262	56.5404	1.27833	81.0811	80	-1.08108
269	59.3464	66.737	7.39066	107.143	107.143	0	269	57.8492	57.6368	-0.212364	122.449	125	2.55102	269	57.6901	70.2628	12.5727	127.66	127.66	0	269	58.3901	60.8087	2.41851	81.0811	81.0811	0
270	58.2298	62.1624	3.93267	107.143	109.091	1.94805	270	52.0431	58.2532	6.21013	117.647	117.647	0	270	58.1592	55.2342	-2.92496	127.66	127.66	0	270	59.0996	60.1291	1.02949	80	81.0811	1.08108
271	56.6502	59.3523	2.70202	103.448	103.448	0	271	54.249	56.2184	1.96933	115.385	115.385	0	271	57.0634	69.7921	12.7287	136.364	136.364	0	271	59.442	63.3218	3.87982	80	78.9474	-1.05263
272	56.5276	63.8402	7.31263	101.695	101.695	0	272	46.6925	51.4637	4.77124	117.647	117.647	0	272	55.3362	59.1448	3.80858	127.66	127.66	0	272	59.2594	64.2484	4.98895	82.1918	82.1918	6.4091e-12
273	56.8179	60.9438	4.12585	98.3607	100	1.63934	273	52.0255	54.4575	2.43196	115.385	113.208	-2.17707	273	59.5433	59.0961	-0.447111	133.333	133.333	0	273	58.1175	63.9289	5.81142	84.507	84.507	-6.76437e-12
274	56.5305	60.9746	4.44408	103.448	101.695	-1.75336	274	50.9837	54.1849	3.20118	117.647	120	2.35294	274	60.4821	71.9384	11.4563	125	122.449	-2.55102	274	59.5088	61.125	1.61624	82.1918	82.1918	6.4091e-12
275	57.6776	63.1782	5.50061	100	100	0	275	47.652	56.8566	9.20463	122.449	125	2.55102	275	55.0684	59.0538	3.98542	133.333	136.364	3.0303	275	58.9651	61.8936	2.92845	78.9474	80	1.05263
276	54.4044	61.5787	7.17435	103.448	103.448	0	276	45.2936	50.5353	5.24173	115.385	115.385	0	276	60.0199	60.5092	0.489301	127.66	127.66	0	276	58.7492	62.6239	3.87472	78.9474	78.9474	-5.91172e-12
277	55.4931	58.6779	3.18477	103.448	103.448	0	277	44.8162	49.4328	4.61655	113.208	111.111	-2.09644	277	60.4375	62.7534	2.31589	133.333	133.333	-8.41283e-12	277	59.5536	66.2134	6.65976	86.9565	84.507	-2.44948
278	55.2674	59.8745	4.60708	105.263	105.263	0	278	50.2457	52.7436	2.49793	109.091	109.091	5.64171e-12	278	60.7518	64.2109	3.45913	130.435	127.66	-2.77521	278	57.2529	55.0367	-2.2162	89.5522	89.5522	0
279	56.6889	60.0933	3.40443	100	101.695	1.69492	279	45.8193	51.649	5.82973	115.385	115.385	-6.30962e-12	279	59.8503	66.3503	6.5	127.66	130.435	2.77521	279	56.1022	67.655	11.5527	89.5522	89.5522	0
280	56.2862	60.2657	3.97957	103.448	101.695	-1.75336	280	46.5376	49.4532	2.91561	113.208	115.385	2.17707	280	60.3338	63.9061	3.57227	122.449	125	2.55102	280	57.0184	57.5249	0.50655	85.7143	86.9565	1.24224
281	57.0429	62.0065	4.96351	101.695	101.695	0	281	50.1195	54.9372	4.81767	117.647	115.385	-2.26244	281	60.4823	56.869	-3.61339	127.66	127.66	7.71649e-12	281	58.0174	62.4473	4.42989	85.7143	85.7143	0
282	56.5284	58.4437	1.9153	103.448	105.263	1.81488	282	45.2885	51.3959	6.10739	105.263	107.143	1.8797	282	60.7401	76.9468	16.2067	133.333	130.435	-2.89855	282	56.7391	61.3326	4.5935	84.507	85.7143	1.20724
283	57.0658	61.7859	4.7201	100	98.3607	-1.63934	283	46.4422	48.4032	1.96096	117.647	115.385	-2.26244	283	60.7377	62.8393	2.1016	127.66	127.66	0	283	57.3885	59.0398	1.65134	82.1918	82.1918	0
284	54.9191	61.4488	6.52968	103.448	103.448	0	284	47.7742	53.7324	5.95826	109.091	111.111	2.0202	284	60.5478	62.1697	1.62193	122.449	125	2.55102	284	57.2145	63.3373	6.12281	85.7143	85.7143	0
285	55.4482	58.3673	2.91912	103.448	103.448	0	285	44.6154	50.6843	6.06888	109.091	107.143	-1.94805	285	60.6871	66.035	5.34791	125	120	-5	285	58.1177	62.5646	4.44692	85.7143	84.507	-1.20724
286	57.0641	61.2778	4.21373	100	100	0	286	48.9149	49.9901	1.07518	107.143	109.091	1.94805	286	61.318	64.6718	3.35379	125	127.66	2.65957	286	57.6113	62.8984	5.28709	85.7143	88.2353	2.52101
287	56.3216	61.7079	5.38637	100	100	0	287	50.5519	53.6535	3.10166	113.208	111.111	-2.09644	287	60.4447	62.6442	2.19955	133.333	133.333	0	287	57.427	62.0031	4.57603	85.7143	84.507	-1.20724
288	55.8794	61.0975	5.21813	100	100	-4.74643e-12	288	51.1511	52.8357	1.68462	107.143	109.091	1.94805	288	61.6175	52.8496	-8.76787	133.333	133.333	0	288	56.9105	60.7854	3.87484	83.3333	83.3333	0
289	52.6448	60.2424	7.59764	101.695	101.695	4.88853e-12	289	51.4317	56.3207	4.889	111.111	109.091	-2.0202	289	58.2931	71.1098	12.8167	130.435	127.66	-2.77521	289	56.262	61.7161	5.45409	86.9565	86.9565	7.16227e-12
290	55.2256	58.648	3.42235	98.3607	100	1.63934	290	55.9383	52.5755	-3.36276	117.647	120	2.35294	290	59.5121	63.7289	4.21685	127.66	130.435	2.77521	290	54.768	61.3119	6.54394	86.9565	86.9565	0
291	55.0583	59.44	4.38166	101.695	100	-1.69492	291	51.5216	57.0497	5.52808	117.647	120	2.35294	291	58.3415	60.8245	2.48302	130.435	130.435	-8.07177e-12	291	57.3042	56.7491	-0.555132	83.3333	82.1918	-1.14155
292	56.2862	62.4042	6.11798	103.448	103.448	0	292	53.9328	58.6176	4.68478	117.647	115.385	-2.26244	292	60.2836	58.4375	-1.84606	133.333	133.333	8.41283e-12	292	57.043	62.6145	5.57147	82.1918	82.1918	0
293	56.9868	55.1678	-1.81902	111.111	111.111	0	293	54.7063	56.2638	1.55751	115.385	120	4.61538	293	61.5843	67.4657	5.88136	127.66	127.66	0	293	57.1184	60.3745	3.25611	83.3333	82.1918	-1.14155
294	58.656	64.7905	6.13449	111.111	111.111	0	294	53.9334	54.6612	0.727836	115.385	113.208	-2.17707	294	60.4339	66.271	5.83705	127.66	127.66	0	294	56.3643	50.579	-5.78537	80	105.263	25.2632
295	58.8276	63.6623	4.83471	105.263	107.143	1.8797	295	55.746	56.469	0.722947	113.208	113.208	0	295	61.3591	60.0328	-1.32628	130.435	130.435	-8.07177e-12	295	57.3493	61.7732	4.42395	78.9474	65.2174	-13.73
296	56.6614	62.4015	5.74009	111.111	111.111	0	296	58.7262	58.0477	-0.678489	113.208	113.208	0	296	61.668	65.1801	3.51214	130.435	130.435	0	296	55.3355	61.128	5.79245	83.3333	83.3333	0
297	57.5842	62.0336	4.44937	107.143	107.143	0	297	55.5544	61.4599	5.90551	113.208	111.111	-2.09644	297	59.3144	67.0912	7.7768	130.435	130.435	0	297	53.7537	58.9789	5.22521	83.3333	83.3333	0
298	56.7439	59.4148	2.67087	107.143	107.143	0	298	58.7916	58.8754	0.083844	111.111	111.111	-5.85487e-12	298	59.4148	60.4621	1.04735	127.66	127.66	0	298	56.0251	59.2139	3.1888	85.7143	84.507	-1.20724
299	58.2936	64.5202	6.2266	107.143	107.143	0	299	56.2662	59.9174	3.65127	113.208	115.385	2.17707	299	61.4461	62.1106	0.66443	136.364	136.364	0	299	56.2928	60.4934	4.20058	83.3333	83.3333	0
300	57.1138	60.6608	3.54701	103.448	105.263	1.81488	300	54.9315	59.205	4.27351	113.208	111.111	-2.09644	300	60.4963	69.3066	8.81029	133.333	133.333	0	300	55.9548	61.8335	5.87864	85.7143	85.7143	0
301	58.3083	61.4458	3.13746	107.143	105.263	-1.8797	301	55.1311	55.9528	0.821705	109.091	111.111	2.0202	301	60.8927	61.9844	1.09174	127.66	127.66	0	301	54.2887	60.0513	5.76259	84.507	84.507	0
302	55.0859	60.9673	5.88144	103.448	105.263	1.81488	302	53.9131	59.5317	5.6186	113.208	113.208	0	302	60.5987	66.121	5.52234	136.364	136.364	8.78231e-12	302	52.9691	54.8912	1.92213	78.9474	80	1.05263
303	55.6088	59.2538	3.64495	107.143	107.143	0	303	54.4757	55.1234	0.647663	115.385	115.385	6.30962e-12	303	61.7756	66.3817	4.60605	133.333	133.333	-8.41283e-12	303	55.636	58.6494	3.01337	78.9474	78.9474	0
304	54.1249	58.2205	4.09556	105.263	105.263	1.05018e-11	304	48.2477	53.4847	5.237	111.111	111.111	-5.85487e-12	304	61.2011	67.6314	6.43024	127.66	127.66	0	304	58.0931	57.6959	-0.397215	76.9231	77.9221	0.999001
305	53.7334	58.0916	4.35814	107.143	107.143	-1.08713e-11	305	46.3492	50.7234	4.37421	115.385	117.647	2.26244	305	60.6366	61.3109	0.674279	133.333	133.333	0	305	56.8057	63.1378	6.33216	84.507	82.1918	-2.31526
306	55.7666	60.1716	4.40509	105.263	103.448	-1.81488	306	54.2104	54.4701	0.259715	109.091	107.143	-1.94805	306	60.3344	64.3782	4.04385	133.333	133.333	0	306	58.2458	60.2839	2.03814	82.1918	82.1918	6.4091e-12
307	55.7119	57.9092	2.19723	101.695	105.263	3.56824	307	51.5894	55.7996	4.21028	109.091	109.091	5.64171e-12	307	60.8113	66.356	5.54465	133.333	133.333	0	307	49.5346	52.2667	2.73205	81.0811	81.0811	6.22435e-12
308	55.9836	60.5508	4.56725	103.448	101.695	-1.75336	308	54.0959	55.9579	1.8619	115.385	115.385	0	308	60.3197	62.6023	2.28257	130.435	130.435	0	308	49.5175	50.0326	0.515097	81.0811	81.0811	6.22435e-12
309	56.8589	63.3871	6.52826	101.695	101.695	0	309	57.7196	58.8637	1.14405	105.263	105.263	0	309	61.0213	62.5004	1.47913	125	125	0	309	48.8515	47.9678	-0.883748	81.0811	89.5522	8.47116
310	55.8316	58.5401	2.70852	103.448	105.263	1.81488	310	57.8073	62.3922	4.58497	109.091	109.091	0	310	60.45	68.3352	7.88517	127.66	127.66	0	310	47.5187	52.2573	4.73857	85.7143	77.9221	-7.79221
311	58.2461	60.557	2.31092	100	96.7742	-3.22581	311	56.4729	58.6864	2.21342	109.091	109.091	-5.64171e-12	311	60.5433	65.3826	4.83936	122.449	122.449	0	311	50.5585	49.175	-1.38348	84.507	86.9565	2.44948
312	56.1214	61.8918	5.77037	101.695	103.448	1.75336	312	57.4863	59.179	1.69262	111.111	111.111	0	312	58.5996	61.9264	3.32672	122.449	122.449	7.10543e-12	312	48.004	53.0586	5.05454	84.507	83.3333	-1.17371
313	57.8814	59.4223	1.54081	101.695	101.695	9.79128e-12	313	57.4974	58.4193	0.921914	109.091	111.111	2.0202	313	60.7397	58.8392	-1.90046	127.66	127.66	0	313	49.8168	48.5372	-1.27956	84.507	84.507	0
314	58.0852	62.7477	4.66251	101.695	101.695	-9.79128e-12	314	57.3128	61.9686	4.65575	109.091	105.263	-3.82775	314	61.3638	70.4383	9.07454	127.66	127.66	0	314	48.5288	52.2258	3.69697	82.1918	82.1918	0
315	57.6898	61.7936	4.10381	101.695	101.695	0	315	52.8751	61.2601	8.38509	109.091	113.208	4.11664	315	60.9746	79.1315	18.157	139.535	139.535	0	315	47.039	47.0327	-0.00634182	83.3333	82.1918	-1.14155
316	57.1	61.0081	3.9081	100	100	0	316	58.2223	58.0068	-0.215479	115.385	113.208	-2.17707	316	60.3192	61.1908	0.87166	139.535	139.535	0	316	45.512	44.6543	-0.85776	80	101.695	21.6949
317	55.4015	60.6684	5.26691	101.695	101.695	0	317	56.9359	55.7835	-1.15241	115.385	115.385	0	317	60.0637	54.443	-5.62073	127.66	130.435	2.77521	317	46.6464	50.0028	3.35635	83.3333	68.9655	-14.3678
318	57.4729	59.409	1.93616	93.75	92.3077	-1.44231	318	57.2223	61.2921	4.06986	115.385	115.385	0	318	60.2432	70.4116	10.1685	130.435	130.435	0	318	42.9807	45.7886	2.80787	82.1918	82.1918	0
319	56.3197	62.8855	6.56581	98.3607	100	1.63934	319	57.1996	61.8535	4.65384	113.208	113.208	0	319	59.868	65.2816	5.41361	130.435	130.435	8.07177e-12	319	44.5714	48.2271	3.6557	82.1918	81.0811	-1.1107
320	57.8405	61.5595	3.71902	100	98.3607	-1.63934	320	56.3931	54.4307	-1.96241	109.091	111.111	2.0202	320	58.4743	59.8343	1.36003	125	125	-7.40386e-12	320	47.6268	47.6638	0.0369636	83.3333	83.3333	0
321	57.6584	55.3276	-2.3308	107.143	107.143	0	321	56.4668	62.4316	5.96487	101.695	100	-1.69492	321	60.0547	58.3951	-1.65965	125	125	0	321	48.1497	44.6876	-3.46206	77.9221	103.448	25.5262
322	57.7998	65.8092	8.00936	107.143	107.143	0	322	55.9985	56.353	0.354457	107.143	109.091	1.94805	322	61.1181	70.6139	9.49581	127.66	127.66	0	322	46.6014	50.8996	4.29813	83.3333	67.4157	-15.9176
323	56.3547	62.4578	6.10311	113.208	113.208	0	323	58.0792	62.4478	4.36865	115.385	111.111	-4.2735	323	58.8661	61.5748	2.70861	127.66	130.435	2.77521	323	47.3274	49.7029	2.3755	82.1918	81.0811	-1.1107
324	57.1429	58.6472	1.50426	105.263	107.143	1.8797	324	58.7823	61.2565	2.47423	107.143	109.091	1.94805	324	59.8701	60.0188	0.148641	127.66	125	-2.65957	324	48.8538	51.7911	2.93725	82.1918	82.1918	-6.4091e-12
325	57.5555	63.0701	5.51461	107.143	105.263	-1.8797	325	59.9143	62.9078	2.9935	105.263	103.448	-1.81488	325	59.6133	62.0945	2.4812	127.66	130.435	2.77521	325	48.9613	47.578	-1.38325	85.7143	93.75	8.03571
326	56.0017	60.6843	4.68264	103.448	103.448	0	326	59.232	64.244	5.01203	111.111	113.208	2.09644	326	60.5561	62.2298	1.67374	130.435	127.66	-2.77521	326	46.4596	49.0877	2.62817	84.507	76.9231	-7.58397
327	56.4816	60.905	4.42341	105.263	105.263	0	327	58.1666	62.0575	3.89092	113.208	113.208	0	327	60.9934	68.0706	7.07725	122.449	125	2.55102	327	49.2306	46.41	-2.82058	81.0811	81.0811	0
328	57.178	61.3002	4.12223	101.695	103.448	1.75336	328	55.4265	58.837	3.41057	111.111	111.111	-5.85487e-12	328	59.4398	62.368	2.92821	125	125	-7.40386e-12	328	48.7073	47.1596	-1.54775	75.9494	98.3607	22.4113
329	58.2743	63.0636	4.78931	105.263	103.448	-1.81488	329	58.4173	59.0912	0.673892	117.647	117.647	6.5512e-12	329	60.6909	62.7008	2.00997	125	125	7.40386e-12	329	47.85	50.695	2.84503	83.3333	68.9655	-14.3678
330	57.0004	61.3996	4.39927	107.143	107.143	0	330	56.3461	61.194	4.84796	103.448	101.695	-1.75336	330	60.701	68.3497	7.64868	127.66	125	-2.65957	330	47.7711	43.7315	-4.03966	76.9231	95.2381	18.315
331	57.5207	64.0874	6.56668	103.448	103.448	0	331	56.4242	55.166	-1.2582	107.143	111.111	3.96825	331	59.4119	61.4258	2.01387	115.385	117.647	2.26244	331	44.9985	51.3853	6.38689	81.0811	65.9341	-15.147
332	57.6477	61.8533	4.20555	103.448	103.448	0	332	56.0152	59.2314	3.21622	109.091	109.091	0	332	58.6611	58.5797	-0.0814483	125	125	7.40386e-12	332	53.1693	53.1312	-0.0380858	89.5522	93.75	4.19776
333	58.9522	62.0322	3.07997	103.448	103.448	-1.01466e-11	333	57.449	58.3976	0.948636	107.143	107.143	0	333	58.7537	64.7973	6.04359	125	125	0	333	52.0108	54.8868	2.87602	89.5522	93.75	4.19776
334	59.1433	64.3495	5.20629	103.448	103.448	1.01466e-11	334	57.8206	60.5301	2.7095	109.091	107.143	-1.94805	334	60.1045	64.1563	4.05185	127.66	127.66	0	334	53.2237	53.1552	-0.0685185	92.3077	88.2353	-4.0724
335	58.9865	64.9665	5.98004	103.448	103.448	0	335	58.133	60.7228	2.58981	111.111	111.111	0	335	60.3798	66.5154	6.13562	122.449	120	-2.44898	335	50.2104	52.8734	2.66295	89.5522	93.75	4.19776
336	57.5851	60.9863	3.40117	98.3607	100	1.63934	336	57.4831	61.1622	3.67907	107.143	109.091	1.94805	336	60.6977	61.1561	0.458414	122.449	125	2.55102	336	51.8739	52.7387	0.864799	93.75	88.2353	-5.51471
337	58.346	61.9141	3.5681	101.695	100	-1.69492	337	54.7933	59.7366	4.94326	111.111	111.111	0	337	59.5929	62.1183	2.52548	122.449	122.449	7.10543e-12	337	54.0146	47.0119	-7.00267	76.9231	101.695	24.7718
338	58.0576	65.4994	7.44184	98.3607	98.3607	0	338	58.9789	59.9928	1.01392	109.091	109.091	0	338	60.6888	63.763	3.07424	120	120	0	338	49.7749	57.2048	7.42996	84.507	66.6667	-17.8404
339	57.2267	60.5116	3.28486	103.448	103.448	0	339	54.9441	62.93	7.98583	109.091	107.143	-1.94805	339	60.2264	65.6355	5.40908	127.66	125	-2.65957	339	50.9943	50.7692	-0.225085	85.7143	86.9565	1.24224
340	57.827	61.1067	3.27967	101.695	103.448	1.75336	340	58.4279	56.6523	-1.77567	109.091	109.091	-5.64171e-12	340	60.2602	57.8914	-2.3688	125	127.66	2.65957	340	48.4235	53.451	5.02747	85.7143	86.9565	1.24224
341	58.4398	64.1339	5.69409	101.695	100	-1.69492	341	56.8208	61.9192	5.0984	107.143	107.143	0	341	60.164	64.8143	4.65033	130.435	130.435	0	341	49.7393	47.8145	-1.92484	84.507	82.1918	-2.31526
342	56.1507	61.3343	5.18352	98.3607	98.3607	0	342	57.3457	60.3037	2.95794	109.091	111.111	2.0202	342	60.4893	73.0657	12.5764	125	122.449	-2.55102	342	49.1501	50.7165	1.56637	78.9474	84.507	5.55967
343	57.6406	61.5666	3.92601	100	100	0	343	55.3932	59.5541	4.16086	107.143	107.143	0	343	60.8962	58.1778	-2.71843	122.449	125	2.55102	343	48.5583	51.465	2.90676	81.0811	75.9494	-5.13171
344	56.5403	61.9752	5.43494	98.3607	100	1.63934	344	58.0667	59.2659	1.19928	109.091	109.091	0	344	59.8567	59.3304	-0.526275	127.66	125	-2.65957	344	44.1171	48.6421	4.52493	83.3333	86.9565	3.62319
345	56.1559	61.9697	5.8138	103.448	101.695	-1.75336	345	59.3972	57.5466	-1.8506	120	117.647	-2.35294	345	60.3444	61.1797	0.835388	127.66	125	-2.65957	345	48.6615	46.4179	-2.24363	80	78.9474	-1.05263
346	56.0887	58.684	2.59529	98.3607	100	1.63934	346	59.2575	64.8936	5.63604	120	117.647	-2.35294	346	59.9967	66.732	6.73528	122.449	125	2.55102	346	53.5398	52.1333	-1.40641	80	80	0
347	57.8816	63.2209	5.33937	101.695	100	-1.69492	347	56.8622	66.0786	9.21641	113.208	115.385	2.17707	347	59.6698	62.642	2.9722	127.66	127.66	0	347	51.8049	52.0269	0.222014	77.9221	78.9474	1.02529
348	59.5864	63.2152	3.62882	101.695	101.695	0	348	59.3685	61.3137	1.94515	120	120	0	348	60.9242	66.0122	5.08804	133.333	133.333	8.41283e-12	348	46.7059	49.8018	3.09585	81.0811	90.9091	9.82801
349	54.7149	49.85	-4.86488	107.143	107.143	0	349	56.0702	65.9146	9.84439	111.111	111.111	0	349	61.1973	69.0298	7.83248	130.435	130.435	-8.07177e-12	349	44.7272	43.5183	-1.20892	78.9474	84.507	5.55967
350	57.4576	63.597	6.13933	107.143	107.143	0	350	57.963	58.3053	0.342328	122.449	122.449	0	350	59.8839	66.5109	6.62705	125	122.449	-2.55102	350	47.4034	45.4867	-1.91668	76.9231	75.9494	-0.97371
351	55.5647	62.3148	6.75016	107.143	109.091	1.94805	351	55.7634	63.567	7.80355	122.449	120	-2.44898	351	58.6551	57.1559	-1.49918	127.66	133.333	5.67376	351	51.1188	46.4036	-4.71516	73.1707	75.9494	2.77864
352	57.5626	59.4651	1.90244	103.448	103.448	0	352	59.6553	62.3266	2.67135	120	120	0	352	58.6245	62.0875	3.46292	130.435	127.66	-2.77521	352	50.5627	51.5041	0.941404	82.1918	66.6667	-15.5251
353	57.8301	62.5066	4.67647	109.091	107.143	-1.94805	353	59.6186	65.7975	6.1789	117.647	120	2.35294	353	59.5331	61.8914	2.35832	130.435	130.435	0	353	49.2659	49.8837	0.617777	75.9494	83.3333	7.38397
354	58.7921	62.9583	4.16612	103.448	105.263	1.81488	354	58.1828	62.2431	4.0603	125	125	0	354	59.5189	63.1242	3.60523	125	127.66	2.65957	354	50.9591	53.6097	2.65058	82.1918	77.9221	-4.2697
355	58.352	62.6736	4.32153	103.448	101.695	-1.75336	355	59.86	63.1864	3.32641	122.449	122.449	0	355	60.5674	62.7063	2.13886	130.435	127.66	-2.77521	355	53.6626	51.901	-1.76162	80	82.1918	2.19178
356	58.0069	61.4396	3.43274	101.695	101.695	0	356	58.4212	64.6615	6.24033	122.449	122.449	0	356	61.2443	64.7368	3.49252	122.449	122.449	0	356	52.6638	53.4978	0.834011	82.1918	82.1918	0
357	58.6006	63.7111	5.11048	101.695	101.695	0	357	60.0112	62.9515	2.94026	122.449	122.449	0	357	59.4664	66.519	7.0526	122.449	125	2.55102	357	50.9357	53.2312	2.2955	80	77.9221	-2.07792
358	58.9931	62.9744	3.98124	100	101.695	1.69492	358	59.439	66.3724	6.93344	122.449	122.449	0	358	60.1201	62.7963	2.67621	122.449	122.449	-7.10543e-12	358	50.3295	52.004	1.67449	77.9221	78.9474	1.02529
359	59.8303	64.6741	4.84378	100	98.3607	-1.63934	359	58.271	63.5094	5.23838	120	120	0	359	59.5205	62.5041	2.98359	120	122.449	2.44898	359	57.2463	56.5648	-0.681455	78.9474	80	1.05263
360	58.2841	65.9538	7.66971	103.448	103.448	0	360	57.8398	63.1391	5.29931	120	117.647	-2.35294	360	59.7461	64.7831	5.03699	122.449	120	-2.44898	360	53.0376	57.7447	4.70707	78.9474	80	1.05263
361	58.7721	62.437	3.66497	101.695	103.448	1.75336	361	55.8834	61.1112	5.22779	120	122.449	2.44898	361	60.6379	63.2013	2.56344	117.647	117.647	-6.5512e-12	361	51.5433	56.334	4.79071	88.2353	86.9565	-1.27877
362	59.5942	66.7688	7.17463	101.695	101.695	0	362	57.5796	61.6889	4.10922	120	120	0	362	60.1131	64.8997	4.78665	125	122.449	-2.55102	362	53.5364	51.3729	-2.16355	85.7143	85.7143	0
363	59.3781	62.6036	3.22548	101.695	100	-1.69492	363	56.9911	62.882	5.8909	115.385	115.385	0	363	61.1243	60.0508	-1.07344	115.385	117.647	2.26244	363	53.7427	51.6994	-2.0433	78.9474	92.3077	13.3603
364	59.1325	66.3402	7.20778	98.3607	98.3607	0	364	56.9538	59.7956	2.84178	122.449	120	-2.44898	364	60.4884	66.5908	6.10243	120	120	0	364	50.4129	52.1506	1.73774	80	73.1707	-6.82927
365	58.243	62.8468	4.60383	105.263	105.263	0	365	58.7035	63.3952	4.69171	120	120	0	365	60.1593	62.3927	2.23344	122.449	120	-2.44898	365	54.2425	50.287	-3.95549	76.9231	80	3.07692
366	59.2993	65.2459	5.94667	100	101.695	1.69492	366	59.7005	65.5805	5.88002	120	122.449	2.44898	366	59.6841	61.5067	1.82257	122.449	125	2.55102	366	54.8614	52.322	-2.5394	72.2892	84.507	12.2179
367	58.0384	60.5928	2.55444	101.695	103.448	1.75336	367	59.3898	65.2521	5.86232	117.647	117.647	0	367	59.228	62.1419	2.91387	122.449	122.449	-7.10543e-12	367	55.2933	54.4091	-0.884155	72.2892	69.7674	-2.52171
368	58.5916	64.7645	6.17288	105.263	101.695	-3.56824	368	59.2601	63.2246	3.96455	120	120	0	368	60.3315	63.363	3.0315	125	122.449	-2.55102	368	53.687	53.8392	0.152276	75.9494	75.9494	0
369	58.9684	62.8256	3.8572	96.7742	98.3607	1.58646	369	58.0067	64.1225	6.11587	120	120	0	369	59.9267	69.0647	9.138	113.208	115.385	2.17707	369	53.4073	52.6226	-0.784694	73.1707	78.9474	5.77664
370	59.1374	62.7594	3.62201	101.695	101.695	0	370	58.78	63.6282	4.84828	115.385	115.385	0	370	60.2433	57.6768	-2.56651	120	120	0	370	53.0735	54.2699	1.19643	75.9494	63.1579	-12.7915
371	59.3945	64.7201	5.32556	105.263	103.448	-1.81488	371	56.8714	62.6096	5.73824	122.449	122.449	0	371	60.2219	65.5239	5.302	115.385	115.385	-6.30962e-12	371	50.4041	50.4624	0.0583929	74.0741	84.507	10.433
372	59.7484	65.565	5.81667	101.695	101.695	0	372	58.706	64.1488	5.44282	122.449	120	-2.44898	372	60.7507	59.2367	-1.51397	130.435	133.333	2.89855	372	48.6925	47.835	-0.857456	75	73.1707	-1.82927
373	58.642	63.3418	4.6998	103.448	103.448	0	373	58.0465	56.3035	-1.74301	125	122.449	-2.55102	373	59.7554	56.3577	-3.39777	130.435	133.333	2.89855	373	54.9436	48.22	-6.72354	71.4286	70.5882	-0.840336
374	59.2568	61.7198	2.46306	100	101.695	1.69492	374	60.3383	62.0505	1.71226	125	122.449	-2.55102	374	58.0426	64.5074	6.4648	133.333	130.435	-2.89855	374	52.4963	53.6966	1.20022	75.9494	66.6667	-9.2827
375	58.3035	65.9156	7.61202	103.448	103.448	0	375	59.0861	70.9103	11.8242	122.449	125	2.55102	375	58.7504	63.6636	4.91325	133.333	133.333	0	375	50.6448	50.2042	-0.440602	75	88.2353	13.2353
376	58.689	62.4637	3.77469	103.448	103.448	0	376	58.9003	61.7309	2.8306	125	127.66	2.65957	376	59.2294	59.6003	0.370858	130.435	133.333	2.89855	376	50.2006	50.4906	0.289997	75	80	5
377	58.7834	52.2642	-6.51919	107.143	107.143	0	377	59.7376	62.6708	2.93325	117.647	117.647	0	377	59.7125	62.7706	3.0581	136.364	133.333	-3.0303	377	52.2663	53.232	0.965647	76.9231	65.2174	-11.7057
378	59.4031	68.7972	9.39406	107.143	107.143	0	378	59.8958	65.7593	5.86356	120	120	0	378	60.0812	64.1503	4.06912	130.435	130.435	8.04334e-12	378	51.4379	50.8803	-0.55759	75	84.507	9.50704
379	59.527	66.0501	6.52305	105.263	105.263	0	379	59.6306	65.5352	5.90458	122.449	122.449	0	379	59.8383	64.1958	4.35745	130.435	130.435	0	379	50.9877	52.0823	1.09458	75.9494	78.9474	2.998
380	58.5139	61.9567	3.44282	107.143	107.143	0	380	60.3715	64.7172	4.34569	117.647	117.647	0	380	60.5264	62.621	2.09463	133.333	133.333	-1.68257e-11	380	52.718	50.0095	-2.70842	75.9494	73.1707	-2.77864
381	58.4758	62.795	4.31925	105.263	105.263	0	381	59.4429	64.486	5.04311	122.449	122.449	0	381	60.3463	63.2664	2.92006	133.333	133.333	1.68257e-11	381	54.4482	55.0484	0.600262	76.9231	65.9341	-10.989
382	58.3314	62.6925	4.36112	105.263	105.263	0	382	58.4129	62.9032	4.49032	120	117.647	-2.35294	382	59.8561	64.9795	5.12339	130.435	133.333	2.89855	382	55.7397	51.9635	-3.77619	71.4286	90.9091	19.4805
383	58.7804	64.3911	5.61072	105.263	105.263	0	383	57.0453	60.6519	3.6066	120	120	0	383	60.0584	62.7988	2.74041	136.364	133.333	-3.0303	383	52.0323	54.9383	2.90596	69.7674	73.1707	3.40329
384	58.1548	62.5215	4.36667	100	101.695	1.69492	384	58.8417	65.9403	7.0986	122.449	122.449	0	384	60.1992	65.768	5.56886	139.535	139.535	0	384	57.0368	52.1942	-4.84262	70.5882	66.6667	-3.92157
385	57.1399	63.4673	6.32744	100	98.3607	-1.63934	385	59.1784	62.6933	3.51486	122.449	122.449	0	385	59.6329	63.5691	3.93618	133.333	133.333	0	385	57.0848	54.953	-2.13174	71.4286	73.1707	1.74216
386	57.9872	59.6164	1.62922	100	101.695	1.69492	386	59.5448	62.9667	3.42198	122.449	122.449	0	386	59.9134	63.3468	3.43337	133.333	133.333	0	386	57.0034	57.3649	0.361525	73.1707	70.5882	-2.5825
387	59.9537	66.5762	6.62241	101.695	101.695	0	387	59.9916	64.7032	4.71158	122.449	125	2.55102	387	59.103	62.6443	3.54134	133.333	133.333	-1.68257e-11	387	50.6715	54.7448	4.07336	80	72.2892	-7.71084
388	58.3234	62.2361	3.9127	100	100	0	388	60.2197	64.8003	4.58062	120	120	0	388	59.7619	64.321	4.55902	136.364	136.364	0	388	53.1071	53.5242	0.417108	80	72.2892	-7.71084
389	58.6785	63.3012	4.62269	100	100	9.47864e-12	389	60.5983	67.2306	6.63236	120	117.647	-2.35294	389	60.3784	64.4577	4.07936	130.435	130.435	1.61151e-11	389	53.1017	49.6204	-3.48126	75	98.3607	23.3607
390	57.7196	64.0753	6.35574	100	100	-9.47864e-12	390	59.2324	64.118	4.88566	120	122.449	2.44898	390	59.5653	63.194	3.62874	133.333	133.333	0	390	49.1498	52.2621	3.11234	75	75.9494	0.949367
391	57.4858	61.0639	3.57807	101.695	101.695	9.79128e-12	391	57.6323	62.0116	4.37933	120	120	0	391	59.7739	63.9833	4.20936	133.333	133.333	0	391	52.1527	51.9336	-0.219141	77.9221	68.9655	-8.95656
392	57.5506	61.5818	4.03117	98.3607	98.3607	-9.166e-12	392	59.1742	61.8121	2.63795	122.449	120	-2.44898	392	60.0742	62.4408	2.36659	136.364	136.364	0	392	52.9997	52.009	-0.990744	72.2892	80	7.71084
393	58.3718	61.5569	3.18506	101.695	101.695	0	393	59.0946	65.3491	6.25445	120	122.449	2.44898	393	60.0086	62.7861	2.77752	133.333	133.333	-1.68257e-11	393	52.7334	53.4066	0.673236	74.0741	75	0.925926
394	59.4015	64.5911	5.18955	96.7742	95.2381	-1.5361	394	58.4614	62.2387	3.7773	120	117.647	-2.35294	394	60.2845	64.2726	3.98817	136.364	136.364	0	394	54.4146	54.7607	0.346043	74.0741	68.9655	-5.10856
395	58.1567	64.5169	6.36026	96.7742	98.3607	1.58646	395	58.92	62.0467	3.12674	115.385	120	4.61538	395	60.1309	64.0573	3.92642	133.333	133.333	1.68257e-11	395	53.3777	53.8362	0.458516	75	81.0811	6.08108
396	58.2501	60.4008	2.15069	98.3607	98.3607	-9.166e-12	396	59.6392	64.1948	4.55563	120	117.647	-2.35294	396	59.6418	63.1896	3.54781	133.333	133.333	0	396	53.8227	54.2969	0.474189	74.0741	70.5882	-3.48584
397	57.5332	66.2214	8.68818	100	100	0	397	59.9493	64.9279	4.97861	117.647	120	2.35294	397	60.0777	62.6658	2.58814	133.333	133.333	0	397	51.0913	50.4518	-0.639519	72.2892	78.9474	6.65821
398	59.4854	59.4092	-0.0762908	103.448	101.695	-1.75336	398	59.6776	63.7626	4.08507	122.449	120	-2.44898	398	60.7944	65.5078	4.71338	130.435	130.435	-1.61151e-11	398	50.3162	50.0481	-0.268079	71.4286	70.5882	-0.840336
399	59.34	66.3339	6.99385	98.3607	100	1.63934	399	58.1953	64.1503	5.95496	120	120	0	399	61.3524	64.3544	3.00201	130.435	133.333	2.89855	399	49.7335	51.1056	1.37211	73.1707	72.2892	-0.881575
400	57.4242	63.0248	5.60062	101.695	100	-1.69492	400	59.0178	62.4708	3.45296	120	120	0	400	60.5509	59.5985	-0.952414	136.364	133.333	-3.0303	400	52.8646	50.8702	-1.99441	77.9221	63.8298	-14.0923
401	58.2973	61.0618	2.76451	98.3607	101.695	3.33426	401	59.9957	64.9742	4.97853	117.647	115.385	-2.26244	401	60.7106	53.6067	-7.1039	136.364	133.333	-3.0303	401	52.1948	48.6934	-3.50145	70.5882	71.4286	0.840336
402	58.2897	66.6621	8.37244	98.3607	96.7742	-1.58646	402	58.5226	61.9831	3.46047	120	125	5	402	60.8513	72.3594	11.5081	133.333	133.333	1.68257e-11	402	49.4642	52.8073	3.34313	70.5882	71.4286	0.840336
403	57.6057	60.7707	3.165	100	100	9.47864e-12	403	58.4757	63.3746	4.89895	117.647	117.647	0	403	60.1362	66.4012	6.26495	136.364	136.364	0	403	50.5315	50.8602	0.328643	71.4286	70.5882	-0.840336
404	57.9912	65.808	7.81676	98.3607	96.7742	-1.58646	404	58.7658	62.4788	3.71294	122.449	120	-2.44898	404	60.1636	63.0748	2.91117	130.435	133.333	2.89855	404	50.8859	51.8676	0.981673	72.2892	68.9655	-3.32364
405	55.4053	56.635	1.22974	107.143	107.143	0	405	57.5347	63.5687	6.03399	120	120	0	405	59.0001	60.1109	1.11076	136.364	133.333	-3.0303	405	49.1697	50.251	1.08126	75	75.9494	0.949367
406	57.4125	64.7455	7.33302	107.143	107.143	0	406	59.2199	61.9335	2.71354	117.647	117.647	0	406	60.8183	65.118	4.29979	130.435	130.435	-1.61151e-11	406	56.9993	61.2698	4.27046	81.0811	81.0811	0
407	56.9158	60.4605	3.54468	107.143	109.091	1.94805	407	57.087	61.1145	4.02749	117.647	120	2.35294	407	60.952	66.1509	5.19896	133.333	133.333	1.68257e-11	407	56.372	62.8714	6.49936	81.0811	81.0811	0
408	58.3243	60.5501	2.22574	109.091	109.091	0	408	57.5782	64.7264	7.14816	120	117.647	-2.35294	408	60.351	61.2759	0.924938	130.435	130.435	0	408	55.1362	58.6811	3.54491	84.507	85.7143	1.20724
409	59.3148	64.6164	5.30153	105.263	103.448	-1.81488	409	58.6269	62.0103	3.38348	122.449	122.449	0	409	59.9491	67.4846	7.53555	130.435	130.435	-1.61151e-11	409	54.4891	57.9977	3.50856	83.3333	84.507	1.17371
410	57.1903	61.619	4.42865	103.448	105.263	1.81488	410	59.639	63.4197	3.78073	125	122.449	-2.55102	410	58.1533	58.021	-0.132285	130.435	133.333	2.89855	410	55.0289	57.72	2.69109	82.1918	81.0811	-1.1107
411	57.3415	61.4731	4.13151	103.448	103.448	0	411	58.9878	60.3214	1.33363	130.435	127.66	-2.77521	411	58.4701	63.3315	4.86137	133.333	130.435	-2.89855	411	52.6741	57.6717	4.99757	81.0811	81.0811	6.22435e-12
412	59.0015	64.4208	5.41927	103.448	103.448	0	412	59.6011	61.1817	1.58059	130.435	127.66	-2.77521	412	58.9791	62.4357	3.45652	139.535	139.535	0	412	55.1355	49.7502	-5.38529	76.9231	103.448	26.5252
413	58.5849	65.0622	6.47738	103.448	103.448	0	413	58.5322	67.2999	8.7677	125	125	-1.47935e-11	413	59.9945	62.0165	2.02199	130.435	130.435	0	413	55.4246	60.7923	5.36769	81.0811	63.1579	-17.9232
414	56.4921	61.1473	4.65529	103.448	103.448	1.01466e-11	414	59.0336	62.767	3.73341	122.449	125	2.55102	414	59.9995	62.2948	2.29528	130.435	133.333	2.89855	414	57.0475	51.0143	-6.03324	75	105.263	30.2632
415	56.7358	62.0234	5.28763	101.695	101.695	-9.79128e-12	415	58.5567	60.5913	2.03461	127.66	125	-2.65957	415	60.0307	64.9618	4.93106	133.333	133.333	0	415	55.2482	55.2717	0.0235382	76.9231	75	-1.92308
416	57.0078	61.774	4.76623	101.695	101.695	0	416	58.8329	63.4116	4.57875	122.449	125	2.55102	416	59.7139	63.8072	4.09323	133.333	130.435	-2.89855	416	55.1117	52.6525	-2.45925	78.9474	75.9494	-2.998
417	57.9197	61.4042	3.4845	103.448	103.448	0	417	58.8183	63.5719	4.75361	125	125	0	417	58.2793	61.6737	3.39442	133.333	136.364	3.0303	417	52.7825	59.1816	6.39917	83.3333	66.6667	-16.6667
418	57.0661	64.9014	7.83527	100	100	0	418	57.9304	61.2986	3.36818	120	122.449	2.44898	418	59.6386	59.2289	-0.409792	136.364	133.333	-3.0303	418	55.3564	49.0128	-6.3436	77.9221	105.263	27.3411
419	55.2206	60.2814	5.06076	103.448	103.448	1.01466e-11	419	56.3081	60.4765	4.1684	117.647	115.385	-2.26244	419	59.5626	64.7321	5.16951	130.435	130.435	0	419	53.1467	60.3975	7.25076	82.1918	65.9341	-16.2577
420	56.4385	59.9109	3.47245	103.448	101.695	-1.75336	420	55.0301	61.5451	6.51496	122.449	122.449	0	420	58.9175	63.4554	4.53796	130.435	130.435	0	420	52.4794	54.7172	2.23779	80	80	0
421	56.1582	61.4903	5.33208	101.695	103.448	1.75336	421	56.7946	60.4765	3.68189	117.647	115.385	-2.26244	421	59.9522	61.1558	1.20366	133.333	133.333	0	421	53.5806	55.3774	1.79686	78.9474	78.9474	0
422	56.6755	60.6931	4.0176	103.448	103.448	1.01466e-11	422	56.4699	59.4012	2.93128	120	122.449	2.44898	422	60.4015	63.515	3.11351	130.435	130.435	-1.61151e-11	422	52.3694	56.0291	3.65969	77.9221	76.9231	-0.999001
423	57.2803	61.0227	3.74249	100	98.3607	-1.63934	423	56.7955	61.3106	4.5151	122.449	120	-2.44898	423	60.4909	64.873	4.38215	133.333	133.333	1.68257e-11	423	52.7571	56.4821	3.72498	82.1918	82.1918	1.2804e-11
424	56.1229	61.1163	4.99344	100	103.448	3.44828	424	57.9185	61.4653	3.54671	117.647	120	2.35294	424	60.0549	65.0848	5.02991	133.333	133.333	0	424	53.1126	55.6591	2.54651	82.1918	81.0811	-1.1107
425	57.5268	60.9202	3.39348	101.695	101.695	0	425	57.9531	62.5625	4.60947	117.647	117.647	0	425	60.831	62.5427	1.71174	133.333	133.333	0	425	52.5915	56.4658	3.87428	83.3333	85.7143	2.38095
426	57.5966	59.8643	2.26763	100	98.3607	-1.63934	426	57.3991	61.2249	3.82576	117.647	117.647	0	426	60.2968	66.6158	6.31895	130.435	130.435	-1.61151e-11	426	53.0885	49.1634	-3.92509	78.9474	103.448	24.5009
427	57.2974	62.4631	5.16579	101.695	101.695	0	427	56.3518	60.5288	4.17707	120	120	0	427	61.4113	63.7898	2.37856	133.333	133.333	1.68257e-11	427	50.811	50.5069	-0.304193	78.9474	73.1707	-5.77664
428	56.5479	60.4269	3.87903	101.695	101.695	0	428	56.5436	60.3667	3.8231	120	120	0	428	60.5803	62.6126	2.0323	136.364	133.333	-3.0303	428	57.3042	59.2784	1.9742	80	78.9474	-1.05263
429	53.707	57.9601	4.25308	100	101.695	1.69492	429	58.4176	61.2335	2.81592	117.647	117.647	0	429	60.2787	60.7518	0.473072	136.364	133.333	-3.0303	429	58.4814	63.4767	4.99528	80	78.9474	-1.05263
430	57.6373	61.1628	3.52556	100	100	0	430	58.9062	63.0342	4.12802	122.449	120	-2.44898	430	60.5437	65.2799	4.7362	139.535	142.857	3.32226	430	54.8362	58.6123	3.77609	78.9474	81.0811	2.13371
431	59.3786	63.2539	3.87531	98.3607	95.2381	-3.12256	431	59.8095	62.429	2.61952	117.647	120	2.35294	431	60.4742	66.2673	5.79311	133.333	130.435	-2.89855	431	55.4772	59.4989	4.02164	81.0811	80	-1.08108
432	58.002	66.2808	8.27886	105.263	105.263	0	432	59.3253	66.5585	7.23327	120	117.647	-2.35294	432	60.5134	63.3597	2.84633	127.66	130.435	2.77521	432	53.8778	58.1084	4.23052	78.9474	80	1.05263
433	58.8571	58.6232	-0.23382	105.263	105.263	0	433	59.4577	63.0827	3.62493	120	120	0	433	59.532	61.0904	1.55844	133.333	136.364	3.0303	433	53.054	56.5276	3.4736	78.9474	78.9474	0
434	58.0918	65.0028	6.91107	105.263	105.263	0	434	59.8551	60.4547	0.599511	117.647	120	2.35294	434	59.3399	64.456	5.11616	133.333	130.435	-2.89855	434	51.4032	56.4149	5.0117	80	80	0
435	57.2113	61.5345	4.32321	107.143	109.091	1.94805	435	56.9963	67.6187	10.6224	120	117.647	-2.35294	435	59.8638	62.8879	3.02418	133.333	133.333	0	435	53.7661	56.6422	2.8761	81.0811	82.1918	1.1107
436	57.2806	56.6594	-0.621157	105.263	105.263	0	436	56.7489	59.6722	2.92331	117.647	122.449	4.80192	436	58.8472	62.5064	3.65918	130.435	133.333	2.89855	436	54.4761	55.7772	1.30104	77.9221	80	2.07792
437	55.0699	57.4511	2.38112	101.695	101.695	0	437	59.1277	62.6355	3.50777	115.385	113.208	-2.17707	437	57.2598	61.1063	3.84643	139.535	136.364	-3.17125	437	57.1711	59.8149	2.6439	81.0811	77.9221	-3.159
438	52.3364	55.492	3.15553	103.448	103.448	0	438	56.74	65.1176	8.37764	122.449	122.449	0	438	58.4282	60.1551	1.72693	130.435	133.333	2.89855	438	55.9523	59.1445	3.19224	80	80	0
439	54.6651	55.4826	0.817554	105.263	103.448	-1.81488	439	59.765	61.5183	1.75331	122.449	120	-2.44898	439	58.94	62.4141	3.4741	136.364	133.333	-3.0303	439	55.5419	61.0007	5.45886	81.0811	82.1918	1.1107
440	55.6314	58.4912	2.85978	103.448	105.263	1.81488	440	59.4087	62.7647	3.35601	122.449	120	-2.44898	440	59.1491	63.5049	4.35579	133.333	133.333	0	440	57.1555	59.3465	2.19097	81.0811	78.9474	-2.13371
441	55.6591	55.6264	-0.0327007	103.448	101.695	-1.75336	441	59.3375	67.2909	7.95339	122.449	122.449	0	441	57.008	60.1435	3.13552	133.333	133.333	0	441	55.6769	60.9785	5.30165	81.0811	83.3333	2.25225
442	55.5847	62.3216	6.73691	107.143	107.143	0	442	58.1731	63.3132	5.14015	122.449	125	2.55102	442	58.6507	59.9704	1.31969	133.333	133.333	-1.68257e-11	442	55.4688	58.3636	2.89477	82.1918	81.0811	-1.1107
443	53.658	55.8994	2.24144	105.263	107.143	1.8797	443	58.283	61.7591	3.47604	122.449	120	-2.44898	443	57.508	60.7147	3.20676	136.364	136.364	0	443	55.4644	55.734	0.26958	78.9474	78.9474	0
444	53.9349	52.1843	-1.75069	101.695	101.695	0	444	58.929	63.3562	4.42715	120	120	0	444	58.8393	61.146	2.30673	133.333	133.333	1.68257e-11	444	54.5868	59.7239	5.13709	81.0811	82.1918	1.1107
445	55.4355	62.6467	7.21116	105.263	103.448	-1.81488	445	58.5181	65.5822	7.06414	120	120	0	445	59.4619	62.2612	2.79927	130.435	133.333	2.89855	445	53.7526	58.3277	4.57507	82.1918	81.0811	-1.1107
446	53.8448	55.8928	2.04798	105.263	105.263	0	446	60.0553	62.4247	2.36938	117.647	120	2.35294	446	58.946	63.2328	4.28678	136.364	136.364	0	446	55.932	50.2661	-5.6659	78.9474	101.695	22.7475
447	55.8697	55.9008	0.0311119	100	101.695	1.69492	447	59.8073	65.8804	6.07312	117.647	117.647	0	447	57.2123	58.5024	1.29003	133.333	133.333	0	447	54.6576	59.9574	5.29982	81.0811	65.9341	-15.147
448	54.309	59.5176	5.20858	101.695	103.448	1.75336	448	56.9724	63.0956	6.12318	117.647	117.647	0	448	59.5345	62.1377	2.60314	133.333	130.435	-2.89855	448	53.5825	57.3763	3.79381	80	80	0
449	53.0463	57.0848	4.03851	101.695	98.3607	-3.33426	449	56.9403	61.794	4.85375	120	117.647	-2.35294	449	58.0417	63.2407	5.19898	136.364	136.364	0	449	51.6119	54.5274	2.91552	83.3333	83.3333	0
450	54.6152	57.553	2.93773	101.695	101.695	-9.79128e-12	450	56.8153	62.0166	5.20125	122.449	122.449	0	450	60.1935	60.8707	0.677156	133.333	136.364	3.0303	450	54.6222	58.2483	3.62602	83.3333	82.1918	-1.14155
451	54.9491	58.1825	3.2334	100	101.695	1.69492	451	58.3466	61.4663	3.11977	120	120	0	451	60.5256	65.6133	5.08761	130.435	127.66	-2.77521	451	52.3408	55.7018	3.36094	83.3333	84.507	1.17371
452	54.9402	57.8276	2.88743	107.143	105.263	-1.8797	452	59.3078	63.5417	4.23386	117.647	120	2.35294	452	60.5688	64.022	3.45317	133.333	133.333	0	452	54.4388	57.6212	3.18239	89.5522	89.5522	1.51914e-11
453	56.3227	59.0983	2.77563	101.695	103.448	1.75336	453	57.9161	63.1892	5.27316	122.449	120	-2.44898	453	60.7053	63.9892	3.28388	133.333	133.333	-1.68257e-11	453	52.9665	61.8479	8.88132	89.5522	89.5522	1.51914e-11
454	56.4394	61.5194	5.07998	101.695	101.695	0	454	58.6128	61.3732	2.76037	120	122.449	2.44898	454	60.1585	66.4983	6.33986	130.435	130.435	1.61151e-11	454	51.8198	54.098	2.27818	89.5522	89.5522	-1.51914e-11
455	53.7549	55.8042	2.04931	109.091	107.143	-1.94805	455	57.8337	63.0188	5.1851	120	120	0	455	60.6854	63.0477	2.36232	130.435	133.333	2.89855	455	53.9444	56.8243	2.87983	85.7143	84.507	-1.20724
456	55.3735	55.913	0.539449	98.3607	101.695	3.33426	456	59.6164	65.0962	5.47984	117.647	115.385	-2.26244	456	61.0182	60.2179	-0.800299	130.435	127.66	-2.77521	456	52.9002	56.2951	3.39491	84.507	86.9565	2.44948
457	54.9334	58.9422	4.00879	100	98.3607	-1.63934	457	57.7286	62.6845	4.95589	120	122.449	2.44898	457	60.6258	56.6235	-4.00232	130.435	127.66	-2.77521	457	51.4816	56.2801	4.79853	84.507	83.3333	-1.17371
458	53.5	55.2017	1.70162	96.7742	96.7742	0	458	57.4211	60.0908	2.66969	122.449	120	-2.44898	458	59.7979	71.3316	11.5337	130.435	130.435	0	458	51.8754	54.8358	2.96047	82.1918	82.1918	0
459	57.256	61.4849	4.22884	100	98.3607	-1.63934	459	57.1857	64.6421	7.45646	122.449	122.449	-1.42109e-11	459	60.4587	64.5492	4.09052	133.333	133.333	-1.68257e-11	459	51.7722	56.746	4.97372	83.3333	83.3333	0
460	57.5247	62.2434	4.71868	101.695	103.448	1.75336	460	57.7586	60.0099	2.25132	117.647	122.449	4.80192	460	60.1697	62.722	2.55228	130.435	133.333	2.89855	460	53.9122	49.9213	-3.99092	81.0811	105.263	24.1821
461	58.0337	55.743	-2.2907	100	98.3607	-1.63934	461	57.3829	62.859	5.4761	120	117.647	-2.35294	461	60.6091	62.1172	1.50813	136.364	133.333	-3.0303	461	52.7697	58.8877	6.11801	82.1918	65.9341	-16.2577
462	58.8608	65.596	6.73514	100	98.3607	-1.63934	462	58.402	60.7528	2.3508	117.647	117.647	0	462	60.3616	65.2675	4.90598	127.66	127.66	0	462	52.6426	57.8779	5.23534	83.3333	84.507	1.17371
463	57.6291	67.3108	9.68172	105.263	107.143	1.8797	463	56.6723	63.2246	6.55224	125	122.449	-2.55102	463	60.4464	66.9241	6.47778	133.333	130.435	-2.89855	463	51.4175	54.9927	3.57522	84.507	84.507	1.35287e-11
464	58.3717	56.2674	-2.10435	107.143	107.143	0	464	57.2814	61.4983	4.21686	115.385	117.647	2.26244	464	60.4296	65.1298	4.70025	130.435	133.333	2.89855	464	50.9276	54.519	3.59139	82.1918	82.1918	0
465	56.6679	62.4515	5.78361	103.448	103.448	0	465	56.989	59.6036	2.61461	120	120	0	465	61.1877	64.5494	3.36174	130.435	130.435	0	465	52.3025	48.1986	-4.1039	77.9221	103.448	25.5262
466	56.6192	62.7164	6.09714	101.695	105.263	3.56824	466	55.5715	61.9144	6.3429	127.66	125	-2.65957	466	60.528	64.3654	3.83743	133.333	133.333	-1.68257e-11	466	51.2185	56.4457	5.22723	82.1918	65.9341	-16.2577
467	58.6612	59.9012	1.24006	103.448	100	-3.44828	467	57.3428	57.0729	-0.269902	127.66	125	-2.65957	467	61.0619	64.9936	3.93168	133.333	130.435	-2.89855	467	53.1634	56.5073	3.34397	81.0811	81.0811	0
468	59.4543	63.0766	3.62221	101.695	101.695	0	468	58.6801	63.0724	4.39232	127.66	125	-2.65957	468	60.1254	64.2044	4.07905	133.333	136.364	3.0303	468	53.6215	50.2386	-3.38292	78.9474	101.695	22.7475
469	58.7449	64.632	5.88712	98.3607	100	1.63934	469	59.328	65.7128	6.38481	122.449	122.449	1.42109e-11	469	60.1975	62.3537	2.15619	133.333	133.333	0	469	53.4636	59.7698	6.3062	83.3333	66.6667	-16.6667
470	60.2288	56.4193	-3.80954	100	98.3607	-1.63934	470	59.4426	61.7669	2.32432	125	127.66	2.65957	470	60.7076	66.907	6.19936	127.66	127.66	0	470	54.4228	49.5636	-4.85925	75	107.143	32.1429
471	58.7178	66.5208	7.80306	96.7742	98.3607	1.58646	471	58.7608	63.4881	4.7273	125	125	0	471	59.7946	64.6127	4.81809	133.333	136.364	3.0303	471	53.8316	61.2026	7.37104	80	60	-20
472	58.7449	53.9569	-4.78806	98.3607	98.3607	0	472	58.8411	62.7554	3.9143	122.449	122.449	0	472	61.4343	63.7109	2.27666	133.333	130.435	-2.89855	472	55.8062	49.9569	-5.84924	78.9474	109.091	30.1435
473	57.4474	63.3623	5.91493	100	100	0	473	58.987	62.7628	3.77583	125	122.449	-2.55102	473	61.1463	63.5126	2.36632	130.435	133.333	2.89855	473	53.3019	61.1733	7.87138	81.0811	63.8298	-17.2513
474	56.9151	61.9856	5.07055	100	100	0	474	59.0544	63.5772	4.52281	122.449	122.449	0	474	60.2543	64.5072	4.25293	130.435	127.66	-2.77521	474	54.2921	50.9315	-3.3606	75.9494	105.263	29.3138
475	56.7343	54.0471	-2.68713	95.2381	96.7742	1.5361	475	57.6797	62.8375	5.15781	120	122.449	2.44898	475	60.5756	66.9167	6.34102	127.66	127.66	0	475	53.6873	59.9637	6.27639	80	61.8557	-18.1443
476	56.5031	60.0962	3.59313	103.448	103.448	0	476	58.7222	62.7957	4.07348	122.449	122.449	0	476	60.784	65.5969	4.81291	130.435	130.435	0	476	54.3482	52.322	-2.02624	77.9221	103.448	25.5262
477	56.7818	57.5241	0.74232	98.3607	98.3607	0	477	59.0622	62.1777	3.11554	122.449	122.449	0	477	60.6273	61.9062	1.27888	127.66	127.66	0	477	53.3019	61.1924	7.89054	81.0811	63.8298	-17.2513
478	54.9751	61.7175	6.74241	103.448	101.695	-1.75336	478	57.847	64.0472	6.20025	122.449	122.449	0	478	61.4191	61.4277	0.00861615	130.435	130.435	-1.61151e-11	478	52.5017	55.2236	2.72189	78.9474	80	1.05263
479	55.4692	55.652	0.182794	101.695	101.695	0	479	57.7596	62.096	4.33647	117.647	117.647	0	479	61.4586	68.7231	7.26449	133.333	133.333	1.68257e-11	479	54.1581	59.4788	5.32071	85.7143	85.7143	1.39124e-11
480	56.7803	60.3077	3.52736	95.2381	96.7742	1.5361	480	56.2088	61.413	5.20425	120	120	0	480	60.6881	67.5634	6.87534	133.333	133.333	0	480	53.6991	59.7943	6.09517	90.9091	92.3077	1.3986
481	56.7972	57.0735	0.276294	98.3607	100	1.63934	481	57.3903	60.931	3.54065	122.449	122.449	0	481	60.2648	62.8207	2.55582	133.333	133.333	0	481	51.9338	59.2496	7.3158	90.9091	92.3077	1.3986
482	57.4391	60.5008	3.06172	98.3607	96.7742	-1.58646	482	58.3362	62.2654	3.92914	122.449	122.449	0	482	60.2495	60.9992	0.749668	133.333	133.333	0	482	54.271	57.1838	2.91282	86.9565	85.7143	-1.24224
483	54.9098	57.5031	2.59324	101.695	100	-1.69492	483	59.2493	61.6157	2.36641	122.449	122.449	0	483	61.7065	65.845	4.13851	136.364	133.333	-3.0303	483	52.6482	56.7717	4.1235	80	82.1918	2.19178
484	56.3158	58.1823	1.86645	98.3607	98.3607	0	484	59.4221	63.6101	4.18795	122.449	120	-2.44898	484	59.072	59.7562	0.684253	133.333	133.333	0	484	52.3408	59.7163	7.37559	84.507	83.3333	-1.17371
485	54.4888	58.9854	4.49657	93.75	95.2381	1.4881	485	59.655	64.5355	4.88049	120	120	0	485	59.4903	59.2735	-0.216782	133.333	133.333	0	485	52.7025	57.2994	4.5969	83.3333	83.3333	-1.31593e-11
486	55.7829	59.155	3.37217	98.3607	95.2381	-3.12256	486	59.1972	63.1337	3.93652	120	122.449	2.44898	486	59.5951	65.2447	5.64967	133.333	133.333	0	486	50.9625	57.021	6.05847	80	80	0
487	57.2527	57.3152	0.0625417	95.2381	98.3607	3.12256	487	58.8891	63.2928	4.40373	120	120	0	487	59.9056	63.2423	3.33678	136.364	136.364	0	487	47.5856	54.5027	6.91706	81.0811	81.0811	0
488	59.7984	64.3127	4.5143	95.2381	95.2381	0	488	59.4577	61.8918	2.43412	122.449	120	-2.44898	488	59.5909	63.6647	4.07379	133.333	133.333	0	488	49.0096	55.0484	6.03883	85.7143	84.507	-1.20724
489	58.9226	58.1267	-0.795916	98.3607	100	1.63934	489	58.3714	63.5064	5.13502	117.647	120	2.35294	489	59.8969	61.9696	2.07264	133.333	133.333	-1.68257e-11	489	49.9869	52.6263	2.63935	83.3333	84.507	1.17371
490	58.8487	62.5724	3.72367	98.3607	100	1.63934	490	57.7713	60.2502	2.47892	117.647	117.647	0	490	59.1278	64.9295	5.80173	133.333	133.333	1.68257e-11	490	50.1754	55.7219	5.54645	81.0811	81.0811	0
491	58.5633	63.463	4.89973	100	100	0	491	58.5074	64.1129	5.60545	120	120	0	491	59.4958	62.0836	2.58777	133.333	136.364	3.0303	491	51.7112	53.4624	1.75119	81.0811	81.0811	0
492	59.9288	65.0679	5.13901	105.263	103.448	-1.81488	492	58.8115	62.8176	4.00612	117.647	117.647	0	492	60.101	63.413	3.31191	130.435	127.66	-2.77521	492	53.4977	57.937	4.43925	81.0811	81.0811	0
493	59.2231	61.5118	2.2887	105.263	107.143	1.8797	493	56.7762	63.6572	6.88099	122.449	120	-2.44898	493	60.1521	63.1765	3.0244	133.333	133.333	-1.68257e-11	493	50.6037	50.3256	-0.27804	78.9474	103.448	24.5009
494	57.8663	63.2085	5.34224	101.695	101.695	0	494	59.3164	59.8244	0.50796	120	122.449	2.44898	494	58.3037	59.1269	0.823196	133.333	136.364	3.0303	494	48.2376	48.5311	0.293508	75.9494	78.9474	2.998
495	58.0109	57.6182	-0.392664	100	98.3607	-1.63934	495	57.0653	47.4419	-9.62335	117.647	115.385	-2.26244	495	57.777	62.2179	4.4409	130.435	130.435	0	495	48.6857	54.5039	5.8182	81.0811	63.8298	-17.2513
496	58.5008	61.7379	3.23711	98.3607	100	1.63934	496	57.7873	61.1134	3.32618	117.647	115.385	-2.26244	496	59.0421	62.3139	3.27188	133.333	130.435	-2.89855	496	48.7712	45.5099	-3.26131	77.9221	103.448	25.5262
497	57.2048	60.6522	3.44747	96.7742	98.3607	1.58646	497	58.085	67.5197	9.43472	120	122.449	2.44898	497	56.2749	63.7554	7.48041	130.435	133.333	2.89855	497	49.0687	55.0167	5.94807	82.1918	64.5161	-17.6757
498	58.5231	66.1607	7.63762	96.7742	95.2381	-1.5361	498	57.7163	56.9833	-0.732997	127.66	127.66	1.54472e-11	498	59.756	59.2309	-0.525102	136.364	133.333	-3.0303	498	44.8402	50.2596	5.41932	81.0811	81.0811	0
499	59.4577	66.1476	6.68989	101.695	100	-1.69492	499	56.8948	55.3489	-1.54592	122.449	122.449	0	499	57.505	61.9748	4.46984	130.435	133.333	2.89855	499	45.0789	48.3654	3.28654	76.9231	77.9221	0.999001
500	58.5516	62.7494	4.19783	100	100	0	500	56.509	58.0234	1.51439	125	125	-1.47935e-11	500	58.8567	59.8294	0.972716	136.364	133.333	-3.0303	500	45.8984	44.3585	-1.53989	76.9231	101.695	24.7718
501	57.9646	61.2917	3.3271	95.2381	96.7742	1.5361	501	56.976	59.9237	2.94771	115.385	117.647	2.26244	501	59.0941	64.7888	5.69477	133.333	133.333	0	501	44.5136	50.789	6.27539	80	63.8298	-16.1702
502	59.2073	65.0311	5.82378	98.3607	98.3607	0	502	55.6614	58.2448	2.58346	111.111	109.091	-2.0202	502	60.5631	64.4662	3.90309	136.364	133.333	-3.0303	502	49.4221	49.6102	0.188065	77.9221	77.9221	0
503	57.4118	63.9238	6.51205	95.2381	95.2381	0	503	57.2202	55.8081	-1.41208	117.647	120	2.35294	503	59.3601	62.0771	2.71704	130.435	136.364	5.92885	503	49.0429	53.1634	4.12047	80	80	0
504	57.9431	57.4539	-0.489223	101.695	101.695	0	504	57.2959	64.4744	7.17852	120	117.647	-2.35294	504	59.1914	62.0821	2.89074	133.333	130.435	-2.89855	504	48.4227	47.1884	-1.23426	76.9231	100	23.0769
505	59.3541	64.8815	5.52741	93.75	92.3077	-1.44231	505	55.7373	53.1638	-2.57348	113.208	115.385	2.17707	505	58.5103	62.5667	4.05635	130.435	130.435	0	505	46.6595	52.9912	6.33176	78.9474	64.5161	-14.4312
506	58.0106	62.8653	4.85478	95.2381	98.3607	3.12256	506	57.737	60.4213	2.68436	120	117.647	-2.35294	506	58.8341	63.5609	4.72679	127.66	130.435	2.77521	506	50.4905	47.4699	-3.0206	77.9221	98.3607	20.4386
507	56.8893	60.8385	3.94913	95.2381	93.75	-1.4881	507	56.2115	61.9617	5.75025	122.449	122.449	0	507	58.935	62.6407	3.7057	133.333	130.435	-2.89855	507	51.5513	55.8368	4.28554	80	63.8298	-16.1702
508	58.0952	63.4614	5.36618	96.7742	96.7742	0	508	57.7905	62.919	5.12853	115.385	117.647	2.26244	508	60.5609	64.3292	3.76831	127.66	127.66	-1.54472e-11	508	54.6448	56.3447	1.69989	82.1918	83.3333	1.14155
509	57.717	61.8109	4.09382	95.2381	95.2381	0	509	58.3002	54.6591	-3.64109	125	122.449	-2.55102	509	58.3893	63.5576	5.16835	127.66	130.435	2.77521	509	53.6706	60.0438	6.37317	82.1918	83.3333	1.14155
510	57.9416	61.2227	3.28103	92.3077	92.3077	0	510	57.7154	62.0515	4.33603	117.647	117.647	0	510	58.5204	59.9952	1.47475	133.333	130.435	-2.89855	510	54.8548	58.2119	3.35707	85.7143	84.507	-1.20724
511	58.4706	59.265	0.794369	95.2381	93.75	-1.4881	511	57.8064	63.9567	6.15029	120	122.449	2.44898	511	60.0207	62.8686	2.84798	133.333	130.435	-2.89855	511	53.805	59.7639	5.95887	84.507	84.507	1.35287e-11
512	57.7277	63.1166	5.38896	95.2381	96.7742	1.5361	512	56.1114	56.4773	0.365892	117.647	117.647	0	512	60.5531	59.3774	-1.17574	136.364	136.364	0	512	52.3844	55.0316	2.64721	81.0811	82.1918	1.1107
513	56.3117	61.0866	4.77487	93.75	95.2381	1.4881	513	55.3011	57.466	2.16496	115.385	115.385	-1.26192e-11	513	60.8995	63.5194	2.61991	136.364	136.364	0	513	51.931	58.0788	6.14779	84.507	84.507	-1.35287e-11
514	56.0169	60.5003	4.48334	98.3607	96.7742	-1.58646	514	58.3518	61.2103	2.85848	122.449	120	-2.44898	514	60.9355	67.0528	6.11735	136.364	133.333	-3.0303	514	53.7914	56.0566	2.26515	85.7143	84.507	-1.20724
515	55.8813	57.5454	1.6641	92.3077	95.2381	2.9304	515	55.6148	57.5529	1.93808	120	120	0	515	59.9146	62.4123	2.49772	136.364	139.535	3.17125	515	54.2015	59.2845	5.08308	84.507	85.7143	1.20724
516	59.2075	61.7928	2.58531	92.3077	89.5522	-2.75545	516	54.6165	56.1162	1.49975	111.111	113.208	2.09644	516	59.702	65.9278	6.22581	133.333	133.333	0	516	51.721	49.0197	-2.70135	80	103.448	23.4483
517	59.6687	57.5394	-2.1293	95.2381	95.2381	0	517	56.4795	57.528	1.04845	120	120	0	517	59.6937	63.2788	3.58511	133.333	136.364	3.0303	517	51.3272	54.4835	3.15625	78.9474	103.448	24.5009
518	59.4212	67.7346	8.3134	95.2381	95.2381	0	518	54.209	61.1509	6.94191	117.647	115.385	-2.26244	518	60.0629	61.3815	1.31855	136.364	133.333	-3.0303	518	50.6291	49.1008	-1.52832	78.9474	103.448	24.5009
519	58.7276	60.2044	1.47682	98.3607	100	1.63934	519	57.6207	56.3146	-1.30609	122.449	125	2.55102	519	59.549	65.0436	5.49458	133.333	133.333	-1.68257e-11	519	52.3753	55.6087	3.23335	82.1918	65.9341	-16.2577
520	58.0082	62.8477	4.83944	101.695	101.695	9.79128e-12	520	55.722	59.9793	4.25729	113.208	113.208	-1.21361e-11	520	59.4125	63.6938	4.28132	133.333	133.333	1.68257e-11	520	49.5711	54.0056	4.43454	80	81.0811	1.08108
521	57.6957	62.1415	4.44577	96.7742	98.3607	1.58646	521	56.7611	61.9144	5.15333	120	122.449	2.44898	521	60.471	63.1986	2.7276	136.364	136.364	0	521	47.0499	52.1814	5.13158	78.9474	78.9474	0
522	58.4598	62.447	3.98719	95.2381	93.75	-1.4881	522	55.2883	56.8744	1.58607	113.208	111.111	-2.09644	522	60.5917	64.5799	3.98817	136.364	136.364	0	522	50.3618	50.9437	0.581906	77.9221	76.9231	-0.999001
523	58.2253	61.0354	2.81014	96.7742	100	3.22581	523	57.0447	57.1912	0.146546	120	122.449	2.44898	523	60.7111	63.9403	3.22925	133.333	133.333	0	523	50.5781	54.9288	4.35067	77.9221	77.9221	-1.15108e-11
524	58.3431	60.9784	2.63533	95.2381	92.3077	-2.9304	524	58.1202	53.4646	-4.65562	120	122.449	2.44898	524	60.9341	65.9337	4.99965	133.333	133.333	0	524	50.5562	47.4966	-3.05964	77.9221	103.448	25.5262
525	54.6448	62.8364	8.19165	93.75	96.7742	3.02419	525	53.5911	63.1816	9.59055	122.449	122.449	0	525	59.525	62.3363	2.81138	136.364	136.364	0	525	49.4012	55.8077	6.40651	80	63.8298	-16.1702
526	56.8396	56.2969	-0.542773	95.2381	96.7742	1.5361	526	56.7301	56.1227	-0.607466	125	122.449	-2.55102	526	59.5335	63.5648	4.0313	127.66	130.435	2.77521	526	47.3272	54.0895	6.76232	83.3333	83.3333	0
527	55.4435	62.3646	6.92113	100	96.7742	-3.22581	527	56.3053	58.7795	2.47422	115.385	117.647	2.26244	527	59.6286	63.8722	4.24359	136.364	133.333	-3.0303	527	47.5728	52.6138	5.04098	80	81.0811	1.08108
528	54.8755	55.907	1.03151	95.2381	98.3607	3.12256	528	54.8172	58.7566	3.9394	122.449	122.449	-1.42109e-11	528	59.811	62.7602	2.94911	133.333	133.333	0	528	44.9819	53.0386	8.0567	81.0811	80	-1.08108
529	56.9693	57.7846	0.815277	92.3077	88.2353	-4.0724	529	58.0253	56.9627	-1.0626	120	120	0	529	59.8617	60.8826	1.02086	136.364	136.364	0	529	51.2517	52.9386	1.68689	82.1918	81.0811	-1.1107
530	56.8977	61.9055	5.00782	92.3077	95.2381	2.9304	530	57.3195	59.8334	2.51397	113.208	113.208	1.21361e-11	530	59.7273	64.8657	5.1384	133.333	133.333	0	530	51.331	53.6013	2.27031	77.9221	80	2.07792
531	57.8418	60.9395	3.09765	95.2381	92.3077	-2.9304	531	56.8658	60.7859	3.9201	117.647	117.647	0	531	59.9335	62.4724	2.53892	133.333	133.333	-1.68257e-11	531	48.8545	48.6322	-0.222319	75.9494	103.448	27.4989
532	56.5054	59.4575	2.95206	90.9091	95.2381	4.329	532	58.0077	60.4869	2.47915	122.449	120	-2.44898	532	59.2183	61.4793	2.26097	133.333	133.333	1.68257e-11	532	49.0959	55.5519	6.45608	81.0811	62.5	-18.5811
533	57.3396	61.2462	3.90661	95.2381	93.75	-1.4881	533	57.5429	61.2701	3.72718	111.111	115.385	4.2735	533	59.6774	63.9967	4.31929	133.333	133.333	0	533	47.5875	53.6696	6.08209	83.3333	83.3333	1.31593e-11
534	58.2144	63.2843	5.06997	95.2381	92.3077	-2.9304	534	57.502	57.2869	-0.215149	122.449	117.647	-4.80192	534	59.9364	64.4451	4.50876	133.333	133.333	0	534	48.3556	53.8865	5.53095	84.507	84.507	0
535	57.8195	63.7682	5.94868	95.2381	96.7742	1.5361	535	55.6956	62.7988	7.10316	113.208	117.647	4.43951	535	60.2941	62.3954	2.10138	136.364	136.364	0	535	47.3043	51.9331	4.62882	84.507	84.507	0
536	56.7742	58.3831	1.60883	93.75	96.7742	3.02419	536	58.1356	58.0286	-0.106944	115.385	113.208	-2.17707	536	59.7952	63.2951	3.49985	133.333	133.333	0	536	50.0463	53.7135	3.66727	85.7143	85.7143	0
537	58.1987	61.968	3.76932	92.3077	89.5522	-2.75545	537	59.2365	62.7526	3.51609	107.143	107.143	0	537	60.2943	63.5297	3.23542	133.333	133.333	-1.68257e-11	537	50.0905	53.9094	3.81893	84.507	85.7143	1.20724
538	57.7915	62.6895	4.89796	93.75	92.3077	-1.44231	538	57.9147	63.5526	5.63789	115.385	115.385	-1.26192e-11	538	60.4433	63.8894	3.446	133.333	133.333	1.68257e-11	538	47.6276	54.2544	6.62685	86.9565	86.9565	-1.43245e-11
539	56.3641	57.2666	0.902498	88.2353	89.5522	1.31694	539	56.7881	59.0374	2.24924	117.647	115.385	-2.26244	539	60.295	63.0534	2.75837	133.333	133.333	0	539	49.7722	51.8961	2.12397	84.507	84.507	1.35287e-11
540	57.3871	62.5285	5.1414	92.3077	92.3077	0	540	57.5853	59.2641	1.67884	117.647	117.647	0	540	60.6361	65.0216	4.38542	130.435	130.435	0	540	47.2187	52.1815	4.96289	82.1918	81.0811	-1.1107
541	58.8723	60.3637	1.49136	88.2353	86.9565	-1.27877	541	58.7388	65.761	7.02219	115.385	115.385	0	541	59.7475	62.8621	3.11461	133.333	133.333	-1.68257e-11	541	47.4648	51.8981	4.43334	82.1918	82.1918	0
542	55.6249	60.4192	4.79431	90.9091	92.3077	1.3986	542	57.7386	60.5657	2.82717	115.385	115.385	-1.26192e-11	542	59.5681	62.1657	2.59754	136.364	133.333	-3.0303
543	54.9293	59.0862	4.1569	92.3077	93.75	1.44231	543	56.6314	57.5453	0.913887	122.449	122.449	0	543	59.4592	62.862	3.40278	133.333	136.364	3.0303
544	58.7038	58.0214	-0.682372	89.5522	86.9565	-2.59572	544	56.5688	62.1331	5.56424	115.385	117.647	2.26244	544	59.8493	61.6836	1.8343	133.333	133.333	0
545	58.684	59.8586	1.17458	95.2381	95.2381	0	545	57.0827	56.9077	-0.174981	115.385	115.385	0	545	59.535	62.3091	2.7741	136.364	136.364	0
546	57.6246	67.8555	10.2308	95.2381	95.2381	0	546	57.3457	59.8096	2.46398	115.385	115.385	0	546	60.3422	62.3264	1.98418	133.333	133.333	0
547	57.4222	54.7584	-2.66388	95.2381	96.7742	1.5361	547	56.7645	64.1385	7.37405	113.208	113.208	0	547	60.3556	65.383	5.02741	136.364	136.364	0
548	58.1404	65.1397	6.99921	96.7742	95.2381	-1.5361	548	56.8128	56.3755	-0.437334	115.385	113.208	-2.17707	548	59.9464	62.8625	2.91602	139.535	139.535	0
549	58.1743	58.0019	-0.172356	90.9091	93.75	2.84091	549	56.1084	57.6885	1.58007	107.143	109.091	1.94805	549	60.0836	62.0656	1.98197	139.535	139.535	0
550	57.7852	62.1848	4.39961	92.3077	90.9091	-1.3986	550	58.0345	65.4808	7.4463	113.208	113.208	-1.21361e-11	550	58.8922	73.7318	14.8396	139.535	139.535	0
551	58.3573	59.1369	0.779599	96.7742	98.3607	1.58646	551	58.5368	50.5498	-7.98698	113.208	113.208	-1.21361e-11	551	58.2285	56.3263	-1.90224	139.535	139.535	0
552	59.7303	63.6725	3.94219	92.3077	89.5522	-2.75545	552	58.0494	62.9226	4.87316	113.208	113.208	-1.21361e-11	552	59.5228	58.8351	-0.687645	133.333	133.333	0
553	56.8776	57.7426	0.865073	89.5522	93.75	4.19776	553	58.5413	62.4173	3.87595	115.385	117.647	2.26244	553	58.7357	67.6772	8.94156	136.364	133.333	-3.0303
554	56.1571	60.9026	4.74547	90.9091	89.5522	-1.35685	554	59.9247	62.1582	2.23348	120	120	0	554	59.048	59.7414	0.693409	136.364	139.535	3.17125
555	58.8649	55.6268	-3.23815	88.2353	88.2353	-7.37543e-12	555	57.3226	62.035	4.71241	113.208	113.208	0	555	60.2324	56.937	-3.29534	139.535	136.364	-3.17125
556	57.4542	61.7674	4.3132	85.7143	88.2353	2.52101	556	57.9688	60.4212	2.45243	115.385	113.208	-2.17707	556	60.6683	62.3666	1.69829	130.435	136.364	5.92885
557	58.1242	60.566	2.4418	88.2353	84.507	-3.72825	557	59.5649	62.8581	3.29325	113.208	115.385	2.17707	557	61.1003	66.9036	5.80331	136.364	130.435	-5.92885
558	57.9219	59.8395	1.9176	83.3333	88.2353	4.90196	558	57.4774	64.3898	6.91239	113.208	113.208	0	558	60.4421	65.5203	5.07823	130.435	133.333	2.89855
559	57.8006	63.631	5.83034	90.9091	86.9565	-3.95257	559	58.3095	55.6752	-2.63436	117.647	117.647	0	559	58.6929	59.6122	0.919322	127.66	127.66	1.54472e-11
560	58.2878	59.9571	1.66933	83.3333	83.3333	-6.57963e-12	560	58.8924	60.6191	1.72673	109.091	109.091	-1.12834e-11	560	58.3522	62.6117	4.25951	139.535	136.364	-3.17125
561	57.8375	61.2622	3.42469	83.3333	84.507	1.17371	561	58.9066	64.9588	6.0522	115.385	115.385	1.26192e-11	561	57.3106	58.0481	0.737459	139.535	142.857	3.32226
562	58.1511	57.3332	-0.817953	81.0811	96.7742	15.6931	562	56.1018	57.1698	1.06808	113.208	113.208	0	562	56.1652	57.749	1.5838	127.66	127.66	-1.54472e-11
563	58.4955	62.5642	4.06872	86.9565	73.1707	-13.7858	563	56.7248	59.1783	2.45344	111.111	111.111	0	563	58.5686	61.166	2.59743	136.364	133.333	-3.0303
564	58.4106	63.6276	5.21705	88.2353	86.9565	-1.27877	564	58.7534	60.0459	1.29259	115.385	113.208	-2.17707	564	59.132	59.1954	0.0633414	133.333	136.364	3.0303
565	56.8907	64.5762	7.68552	84.507	85.7143	1.20724	565	56.9095	70.052	13.1425	111.111	111.111	1.17097e-11	565	58.4671	57.4446	-1.02251	125	125	0
566	60.3583	63.1995	2.8413	84.507	83.3333	-1.17371	566	57.0235	52.241	-4.78255	115.385	117.647	2.26244	566	56.1178	59.5233	3.40552	133.333	130.435	-2.89855
567	59.349	64.3343	4.98533	86.9565	86.9565	0	567	57.1781	62.6254	5.44728	117.647	115.385	-2.26244	567	57.7545	59.6577	1.90322	133.333	133.333	1.68257e-11
568	58.9719	63.4181	4.44614	84.507	85.7143	1.20724	568	59.7557	65.3008	5.54509	113.208	115.385	2.17707	568	60.46	63.1664	2.70643	122.449	125	2.55102
569	57.4755	61.7347	4.25927	83.3333	83.3333	0	569	56.5929	61.9765	5.38357	115.385	115.385	0	569	59.1529	60.3826	1.22965	130.435	130.435	1.61151e-11
570	57.9286	59.216	1.28735	86.9565	85.7143	-1.24224	570	59.6486	58.1813	-1.46734	115.385	113.208	-2.17707	570	56.5961	57.6303	1.03419	139.535	139.535	0
571	59.103	64.793	5.69004	88.2353	89.5522	1.31694	571	57.7787	64.0753	6.29663	113.208	115.385	2.17707	571	58.3226	58.4703	0.147726	133.333	133.333	0
572	56.6589	55.9605	-0.698415	107.143	107.143	0	572	59.0698	62.0833	3.01341	115.385	115.385	0	572	59.0454	61.6362	2.59082	136.364	136.364	0
573	58.8024	62.5117	3.70929	107.143	107.143	0	573	58.9139	58.9088	-0.00510804	107.143	107.143	0	573	59.4022	58.5043	-0.897906	130.435	130.435	-1.61151e-11
574	56.1804	63.4651	7.28473	103.448	103.448	0	574	59.7856	62.9691	3.18344	115.385	115.385	0	574	58.741	58.9389	0.197852	139.535	136.364	-3.17125
575	59.5128	62.9388	3.42594	105.263	105.263	0	575	58.8703	65.0957	6.22538	111.111	113.208	2.09644	575	59.0822	57.9292	-1.15306	136.364	139.535	3.17125
576	60.0974	65.8172	5.71973	105.263	107.143	1.8797	576	58.6108	61.2857	2.67493	115.385	113.208	-2.17707	576	58.5027	64.1579	5.65517	133.333	133.333	0
577	59.7045	64.4912	4.78677	103.448	101.695	-1.75336	577	56.3293	59.4963	3.16698	111.111	115.385	4.2735	577	59.0599	60.0388	0.978879	136.364	136.364	0
578	59.5014	64.9379	5.43649	98.3607	98.3607	0	578	58.3989	58.6164	0.21748	111.111	107.143	-3.96825	578	60.7189	60.2669	-0.452001	133.333	130.435	-2.89855
579	58.5618	65.9282	7.36639	100	100	0	579	59.3136	59.4792	0.165562	117.647	117.647	0	579	61.122	80.1432	19.0212	136.364	136.364	0
580	58.6486	64.5902	5.94159	101.695	103.448	1.75336	580	59.7384	61.1624	1.42401	117.647	117.647	0	580	60.2443	60.1082	-0.136096	136.364	136.364	0
581	58.1884	63.0522	4.86378	100	98.3607	-1.63934	581	58.3568	63.5113	5.1545	117.647	117.647	0	581	60.1349	52.4106	-7.72436	142.857	142.857	0
582	58.312	63.6097	5.29773	101.695	101.695	0	582	59.0906	61.8536	2.76298	113.208	115.385	2.17707	582	59.7943	64.1713	4.37703	142.857	139.535	-3.32226
583	57.2494	62.1953	4.94594	100	100	0	583	57.2239	59.0437	1.81981	115.385	115.385	0	583	60.5207	67.2194	6.69869	139.535	146.341	6.80658
584	54.5663	61.4891	6.9228	100	101.695	1.69492	584	57.8348	57.9947	0.159904	115.385	113.208	-2.17707	584	59.4517	56.042	-3.40966	139.535	139.535	0
585	55.5862	58.5571	2.9709	100	98.3607	-1.63934	585	57.3655	61.572	4.20656	115.385	115.385	0	585	60.4461	66.6937	6.24752	139.535	136.364	-3.17125
586	57.9515	61.1978	3.24631	100	100	0	586	57.6627	58.4219	0.759193	113.208	115.385	2.17707	586	58.9006	55.3053	-3.59527	139.535	142.857	3.32226
587	58.2969	63.7338	5.43693	95.2381	96.7742	1.5361	587	56.4967	59.9654	3.46867	113.208	113.208	1.21361e-11	587	58.2406	57.4737	-0.766916	139.535	139.535	0
588	56.0367	62.8802	6.84352	98.3607	96.7742	-1.58646	588	57.7935	61.1838	3.39036	115.385	115.385	0	588	57.6556	68.6602	11.0046	139.535	136.364	-3.17125
589	57.0341	60.6832	3.64914	98.3607	98.3607	0	589	53.8229	55.7855	1.96266	111.111	115.385	4.2735	589	61.4217	65.5705	4.14881	133.333	133.333	0
590	58.6405	63.7332	5.09268	103.448	103.448	0	590	58.4742	58.626	0.151714	115.385	111.111	-4.2735	590	61.4867	53.5482	-7.93843	136.364	139.535	3.17125
591	57.7038	64.5589	6.85509	96.7742	98.3607	1.58646	591	58.0846	61.5853	3.50071	117.647	117.647	-1.31166e-11	591	59.7171	55.5286	-4.1885	133.333	130.435	-2.89855
592	57.3326	59.9666	2.63399	96.7742	96.7742	0	592	57.7715	57.5881	-0.183398	113.208	115.385	2.17707	592	61.0675	71.2624	10.1949	136.364	139.535	3.17125
593	55.4775	63.4218	7.9443	101.695	101.695	0	593	58.172	61.8065	3.63448	105.263	107.143	1.8797	593	59.9207	67.463	7.54236	139.535	136.364	-3.17125
594	54.8679	60.0842	5.21628	103.448	103.448	1.01466e-11	594	57.4998	61.3269	3.82709	111.111	109.091	-2.0202	594	59.3522	54.5661	-4.78613	133.333	136.364	3.0303
595	54.8516	55.3786	0.526962	100	101.695	1.69492	595	57.6827	60.4176	2.7349	113.208	111.111	-2.09644	595	60.7635	56.6428	-4.12068	133.333	133.333	0
596	54.6625	61.7278	7.06532	100	98.3607	-1.63934	596	57.7166	58.131	0.414386	111.111	115.385	4.2735	596	59.4828	67.7847	8.30196	139.535	139.535	0
597	55.8954	59.5995	3.70409	101.695	101.695	0	597	57.3483	61.8908	4.54244	109.091	105.263	-3.82775	597	60.4838	61.4944	1.0106	130.435	130.435	-1.61151e-11
598	55.1866	59.2842	4.09768	101.695	101.695	0	598	56.0804	58.8217	2.74127	103.448	107.143	3.69458	598	60.7477	63.8697	3.12198	136.364	133.333	-3.0303
599	54.9286	60.5172	5.58862	105.263	103.448	-1.81488	599	58.5332	61.5016	2.96841	117.647	113.208	-4.43951	599	58.7598	61.3267	2.56688	130.435	133.333	2.89855
600	58.1159	55.8604	-2.25553	111.111	107.143	-3.96825	600	57.9161	58.6465	0.73046	105.263	107.143	1.8797	600	58.569	57.3398	-1.22922	133.333	133.333	0
601	57.2386	64.7419	7.50332	111.111	107.143	-3.96825	601	57.7195	60.9154	3.19586	107.143	107.143	0	601	59.9941	61.0226	1.02856	130.435	130.435	-1.61151e-11
602	58.9013	62.3577	3.45644	103.448	107.143	3.69458	602	57.8959	60.9069	3.01103	109.091	109.091	0	602	60.3016	64.596	4.29437	127.66	125	-2.65957
603	57.8117	61.5961	3.78436	107.143	107.143	2.17568e-11	603	55.1539	58.0551	2.90127	105.263	109.091	3.82775	603	59.2721	60.8107	1.53855	130.435	133.333	2.89855
604	57.0377	63.7975	6.75983	105.263	105.263	0	604	58.5472	60.1909	1.64375	111.111	105.263	-5.84795	604	60.1389	56.9512	-3.18775	133.333	133.333	-1.68257e-11
605	57.4984	61.5418	4.04339	105.263	105.263	-2.10036e-11	605	58.7735	64.2602	5.48674	109.091	111.111	2.0202	605	61.0128	66.7362	5.7234	130.435	130.435	1.61151e-11
606	58.2114	63.3304	5.11903	107.143	105.263	-1.8797	606	58.241	63.2078	4.96683	115.385	113.208	-2.17707	606	61.0146	64.6505	3.63595	127.66	130.435	2.77521
607	57.6445	63.4317	5.78714	109.091	111.111	2.0202	607	59.1426	57.333	-1.80953	115.385	115.385	-1.26192e-11	607	61.2574	58.4823	-2.77511	127.66	125	-2.65957
608	57.6976	61.4466	3.749	105.263	103.448	-1.81488	608	59.0791	65.5427	6.46361	115.385	115.385	-1.26192e-11	608	60.8745	59.1506	-1.72393	136.364	136.364	0
609	56.6237	60.4953	3.87165	105.263	107.143	1.8797	609	59.0978	63.5983	4.50051	117.647	117.647	1.31166e-11	609	61.5709	54.5957	-6.97525	136.364	136.364	0
610	58.5357	63.583	5.04733	107.143	105.263	-1.8797	610	59.2961	62.8637	3.56759	117.647	115.385	-2.26244	610	59.5401	70.7857	11.2457	139.535	136.364	-3.17125
611	59.377	63.9006	4.52362	103.448	105.263	1.81488	611	59.263	60.1298	0.866783	113.208	115.385	2.17707	611	60.7444	61.2761	0.531639	133.333	136.364	3.0303
612	58.0685	64.7787	6.71023	105.263	103.448	-1.81488	612	58.2293	61.4827	3.25337	111.111	111.111	0	612	59.7549	59.6347	-0.120165	130.435	133.333	2.89855
613	58.5704	62.6831	4.11271	101.695	101.695	-1.95968e-11	613	56.4955	59.6933	3.19782	109.091	113.208	4.11664	613	60.7188	61.7337	1.01494	133.333	130.435	-2.89855
614	56.581	64.9318	8.35078	105.263	107.143	1.8797	614	57.6732	58.2264	0.553254	113.208	109.091	-4.11664	614	58.7162	64.259	5.54279	133.333	133.333	1.68257e-11
615	57.3831	59.6788	2.29572	103.448	103.448	0	615	56.5373	62.027	5.48964	113.208	115.385	2.17707	615	60.5893	60.5076	-0.0816307	127.66	127.66	0
616	53.2726	60.8889	7.61637	105.263	105.263	-2.10036e-11	616	58.5091	58.8539	0.344764	105.263	105.263	0	616	59.9256	60.3435	0.417857	133.333	133.333	-1.68257e-11
617	56.6768	57.4492	0.772364	103.448	101.695	-1.75336	617	59.0004	63.9337	4.93329	115.385	113.208	-2.17707	617	57.6417	62.4283	4.7866	127.66	127.66	1.54472e-11
618	56.7862	63.023	6.23681	105.263	107.143	1.8797	618	58.7728	59.9946	1.22179	107.143	109.091	1.94805	618	60.4502	66.4164	5.96612	125	125	0
619	57.2451	60.0148	2.76971	107.143	105.263	-1.8797	619	59.1287	64.2328	5.10406	111.111	111.111	0	619	60.3988	59.4283	-0.970472	127.66	130.435	2.77521
620	57.88	62.1106	4.23058	107.143	109.091	1.94805	620	57.6828	58.6934	1.01061	105.263	107.143	1.8797	620	61.1805	63.9361	2.7556	125	122.449	-2.55102
621	59.0138	65.436	6.42229	107.143	105.263	-1.8797	621	58.5021	62.9814	4.47924	100	100	0	621	60.5947	59.7697	-0.825009	127.66	130.435	2.77521
622	56.891	59.8633	2.97232	103.448	105.263	1.81488	622	58.6246	62.4195	3.79494	107.143	105.263	-1.8797	622	60.463	59.7307	-0.732327	130.435	130.435	0
623	58.606	62.7098	4.10381	107.143	105.263	-1.8797	623	58.9046	61.4028	2.49821	113.208	109.091	-4.11664	623	60.5825	67.2068	6.62423	133.333	130.435	-2.89855
624	59.4455	63.2092	3.76367	103.448	105.263	1.81488	624	59.8337	64.0125	4.17878	109.091	113.208	4.11664	624	60.4381	62.1499	1.71187	125	127.66	2.65957
625	58.3114	64.4032	6.09182	105.263	105.263	-2.10036e-11	625	59.4954	65.5273	6.03194	111.111	109.091	-2.0202	625	59.9472	58.9136	-1.03366	125	125	1.47935e-11
626	58.5767	60.5893	2.01263	105.263	105.263	2.10036e-11	626	57.0788	59.7239	2.64502	111.111	115.385	4.2735	626	60.4091	65.391	4.98192	130.435	127.66	-2.77521
627	57.5585	64.3955	6.83699	107.143	105.263	-1.8797	627	58.0618	63.2402	5.17835	111.111	107.143	-3.96825	627	60.5617	65.9128	5.35112	127.66	127.66	0
628	59.6204	60.6943	1.07391	103.448	103.448	2.02789e-11	628	60.2807	62.5217	2.24104	109.091	109.091	-1.12834e-11	628	59.5391	64.0734	4.53431	130.435	133.333	2.89855
629	58.2292	57.0502	-1.17892	105.263	105.263	2.10036e-11	629	59.2147	66.9008	7.68602	109.091	109.091	1.12834e-11	629	60.2248	59.9578	-0.267067	122.449	122.449	1.42109e-11
630	58.8733	66.0064	7.13311	105.263	105.263	2.10036e-11	630	58.285	58.5262	0.241183	115.385	117.647	2.26244	630	59.7975	64.1492	4.35165	130.435	130.435	0
631	60.5818	66.353	5.77122	103.448	103.448	0	631	59.8314	63.2927	3.46138	109.091	107.143	-1.94805	631	60.7296	63.2659	2.53623	122.449	120	-2.44898
632	59.4405	64.4554	5.01493	105.263	105.263	-2.10036e-11	632	59.9317	65.6114	5.67976	111.111	111.111	0	632	60.8009	63.3484	2.54751	127.66	127.66	1.54472e-11
633	59.2997	65.7284	6.42876	103.448	105.263	1.81488	633	57.7736	62.1692	4.39556	117.647	117.647	0	633	60.8126	65.7952	4.98263	125	125	0
634	58.3904	62.362	3.97158	105.263	105.263	-2.10036e-11	634	58.5692	56.4832	-2.08601	111.111	113.208	2.09644	634	60.3619	62.9135	2.55157	125	125	-1.47935e-11
635	59.5551	63.6305	4.07535	103.448	103.448	2.02789e-11	635	58.8402	64.728	5.88783	103.448	105.263	1.81488	635	60.7338	64.3266	3.59271	125	125	1.47935e-11
636	58.7771	64.8256	6.04855	107.143	105.263	-1.8797	636	57.786	61.8763	4.09033	107.143	105.263	-1.8797	636	60.8309	58.1639	-2.66697	133.333	130.435	-2.89855
637	58.2954	61.2227	2.9273	101.695	103.448	1.75336	637	58.2356	58.4327	0.197155	107.143	107.143	0	637	60.7523	59.8219	-0.930425	133.333	130.435	-2.89855
638	59.7077	64.346	4.63829	105.263	105.263	2.10036e-11	638	58.4907	62.9918	4.50102	107.143	107.143	0	638	60.7719	67.1331	6.36119	136.364	136.364	0
639	58.8534	67.0788	8.22534	107.143	107.143	-2.17568e-11	639	57.9014	57.0359	-0.865451	113.208	113.208	1.21361e-11	639	60.0021	66.8703	6.86828	133.333	136.364	3.0303
640	59.7617	60.8385	1.07687	107.143	107.143	2.17568e-11	640	57.929	59.3493	1.42024	113.208	113.208	1.21361e-11	640	60.2019	56.0743	-4.12759	133.333	133.333	-1.68257e-11
641	59.9861	67.0609	7.07483	107.143	105.263	-1.8797	641	57.2398	62.3474	5.10766	109.091	109.091	0	641	60.0416	61.4593	1.41769	139.535	142.857	3.32226
642	59.4918	61.8461	2.35432	101.695	103.448	1.75336	642	57.9707	63.0834	5.11269	115.385	113.208	-2.17707	642	59.8053	65.6446	5.83932	139.535	136.364	-3.17125
643	58.4174	64.0901	5.67265	103.448	103.448	0	643	56.9871	60.0414	3.05433	111.111	115.385	4.2735	643	61.1291	63.4828	2.35373	130.435	130.435	-1.61151e-11
644	58.5251	63.5234	4.99824	107.143	105.263	-1.8797	644	58.7753	59.8331	1.05785	115.385	113.208	-2.17707	644	60.6624	63.0555	2.39315	136.364	136.364	0
645	59.3085	62.3085	3.00007	105.263	105.263	2.10036e-11	645	56.8231	62.5063	5.68327	111.111	111.111	0	645	60.096	61.1054	1.00941	133.333	133.333	1.68257e-11
646	58.9941	63.6149	4.62082	105.263	107.143	1.8797	646	58.4879	59.1984	0.710495	107.143	107.143	0	646	59.69	60.9392	1.24916	133.333	133.333	0
647	59.0514	62.4755	3.42411	101.695	101.695	1.95968e-11	647	56.7709	65.497	8.72607	107.143	107.143	-1.08713e-11	647	60.5166	63.4424	2.92583	136.364	139.535	3.17125
648	58.2434	61.3118	3.06839	105.263	103.448	-1.81488	648	58.1335	53.9536	-4.17999	109.091	111.111	2.0202	648	59.3182	65.3731	6.05484	130.435	127.66	-2.77521
649	58.6468	64.3725	5.72567	101.695	103.448	1.75336	649	56.1979	61.7464	5.54855	107.143	107.143	0	649	61.4107	61.8842	0.473487	130.435	130.435	1.61151e-11
650	58.6816	61.0237	2.34214	103.448	101.695	-1.75336	650	58.2303	57.5743	-0.655979	109.091	107.143	-1.94805	650	59.2956	63.7335	4.43783	133.333	133.333	0
651	59.0737	61.3572	2.28343	105.263	105.263	-2.10036e-11	651	58.0534	60.074	2.02056	100	101.695	1.69492	651	59.9017	61.7312	1.8295	136.364	136.364	0
652	58.3014	64.1197	5.81832	101.695	103.448	1.75336	652	58.5021	62.7793	4.27725	109.091	107.143	-1.94805	652	60.8892	66.1772	5.28798	125	125	0
653	59.2925	62.4028	3.11036	103.448	101.695	-1.75336	653	58.8013	60.3226	1.52132	100	101.695	1.69492	653	61.4743	62.7982	1.32391	127.66	130.435	2.77521
654	57.4215	62.2446	4.82315	103.448	107.143	3.69458	654	57.7118	62.0967	4.38495	105.263	105.263	0	654	60.3101	62.0297	1.71956	133.333	133.333	0
655	58.4564	62.5837	4.12724	103.448	101.695	-1.75336	655	58.5124	60.528	2.01564	105.263	105.263	0	655	61.3108	64.5663	3.25552	133.333	130.435	-2.89855
656	58.4629	64.2962	5.8333	109.091	107.143	-1.94805	656	58.7017	58.6059	-0.0957601	100	100	0	656	59.6378	64.4059	4.76806	130.435	133.333	2.89855
657	59.0686	55.6565	-3.4121	103.448	103.448	-2.02789e-11	657	58.4805	62.9147	4.43424	100	101.695	1.69492	657	57.8438	60.6805	2.83671	136.364	133.333	-3.0303
658	58.719	66.3884	7.66944	103.448	103.448	-2.02789e-11	658	56.8659	60.8557	3.98986	103.448	101.695	-1.75336	658	61.3106	62.298	0.987437	127.66	127.66	-1.54472e-11
659	59.0096	65.0142	6.00455	103.448	101.695	-1.75336	659	57.0129	60.0678	3.05497	103.448	101.695	-1.75336	659	60.0906	68.346	8.25533	125	127.66	2.65957
660	58.5146	58.2399	-0.274683	103.448	105.263	1.81488	660	59.1837	62.2216	3.03794	105.263	105.263	0	660	59.7601	55.5078	-4.25231	130.435	130.435	-1.61151e-11
661	57.588	63.006	5.41797	105.263	105.263	-2.10036e-11	661	57.7676	61.4436	3.67606	103.448	105.263	1.81488	661	60.3801	65.2251	4.84497	125	125	1.47935e-11
662	57.3036	60.5465	3.24293	101.695	101.695	1.95968e-11	662	57.9146	60.0767	2.16208	105.263	105.263	0	662	59.6776	66.2457	6.56812	127.66	127.66	0
663	57.9018	63.2048	5.30306	105.263	103.448	-1.81488	663	58.4156	62.0629	3.6473	101.695	100	-1.69492	663	61.1481	63.3155	2.16741	130.435	127.66	-2.77521
664	55.9981	59.0462	3.04806	103.448	103.448	-2.02789e-11	664	60.4737	64.3527	3.87901	101.695	101.695	-9.79128e-12	664	61.3887	61.3141	-0.074539	133.333	133.333	0
665	56.4151	58.4471	2.03203	103.448	105.263	1.81488	665	59.7152	61.4242	1.70902	109.091	109.091	1.12834e-11	665	60.6979	58.7197	-1.97821	133.333	133.333	0
666	55.9623	59.5311	3.56885	101.695	101.695	0	666	59.3014	65.4585	6.15714	109.091	107.143	-1.94805	666	61.6673	64.7977	3.13044	133.333	133.333	0
667	56.2296	60.4435	4.21385	101.695	100	-1.69492	667	54.914	50.5541	-4.35997	115.385	113.208	-2.17707	667	60.4664	62.4653	1.99893	133.333	133.333	-1.68257e-11
668	55.2118	60.2608	5.04906	107.143	107.143	2.17568e-11	668	56.6071	61.7419	5.13481	115.385	113.208	-2.17707	668	60.8592	68.1962	7.33704	130.435	130.435	1.61151e-11
669	58.0574	59.544	1.48657	105.263	105.263	-2.10036e-11	669	56.5232	63.2149	6.69167	117.647	120	2.35294	669	60.2221	61.2648	1.04273	130.435	130.435	0
670	56.8042	60.8967	4.09248	103.448	105.263	1.81488	670	58.0134	61.9236	3.91012	122.449	122.449	0	670	60.3901	63.4946	3.10445	133.333	133.333	0
671	57.0538	60.736	3.68218	105.263	105.263	-2.10036e-11	671	59.3418	62.6734	3.33162	122.449	122.449	0	671	59.3135	62.9603	3.64681	133.333	133.333	-1.68257e-11
672	58.1477	59.9036	1.75591	107.143	107.143	2.17568e-11	672	58.0447	62.1463	4.10159	120	120	0	672	60.7566	65.8818	5.12527	130.435	130.435	1.61151e-11
673	57.8025	61.6621	3.85955	98.3607	98.3607	0	673	58.6615	64.2982	5.63665	115.385	115.385	0	673	60.1631	66.5509	6.38775	127.66	130.435	2.77521
674	58.1168	63.2701	5.15326	105.263	105.263	-2.10036e-11	674	58.6699	64.2909	5.62099	117.647	117.647	0	674	58.5269	59.5117	0.984819	127.66	127.66	0
675	57.8981	60.1807	2.28265	103.448	103.448	2.02789e-11	675	59.0144	63.7953	4.78094	120	120	0	675	60.3991	64.0021	3.60298	127.66	125	-2.65957
676	57.9706	62.3118	4.34119	101.695	101.695	0	676	59.7246	64.6422	4.91767	117.647	115.385	-2.26244	676	60.6281	64.7558	4.12768	127.66	127.66	1.54472e-11
677	57.057	61.3651	4.30806	107.143	105.263	-1.8797	677	58.9969	65.3453	6.34845	117.647	117.647	1.31166e-11	677	59.5605	61.2224	1.66196	122.449	125	2.55102
678	56.9659	60.8452	3.87931	101.695	103.448	1.75336	678	58.1064	62.4846	4.37826	120	120	0	678	59.255	57.3884	-1.86666	133.333	133.333	0
679	57.0569	59.6695	2.61259	105.263	105.263	0	679	57.9251	62.4464	4.52129	120	122.449	2.44898	679	60.9292	63.961	3.03183	130.435	127.66	-2.77521
680	58.0611	62.1259	4.06487	105.263	105.263	-2.10036e-11	680	56.2754	62.8964	6.62102	117.647	117.647	0	680	59.3218	62.9514	3.62964	127.66	130.435	2.77521
681	56.8453	62.4785	5.63325	103.448	103.448	2.02789e-11	681	55.6371	59.551	3.91396	120	120	0	681	60.0078	62.1036	2.09583	133.333	130.435	-2.89855
682	55.8096	58.8586	3.04906	101.695	101.695	-1.95968e-11	682	56.5586	60.0532	3.49461	117.647	117.647	0	682	60.6364	71.6062	10.9698	122.449	122.449	0
683	56.3955	60.756	4.36054	103.448	103.448	0	683	58.4943	63.2891	4.79483	120	120	0	683	59.4288	56.602	-2.82676	127.66	130.435	2.77521
684	57.2515	62.7113	5.45977	103.448	101.695	-1.75336	684	57.5941	63.5941	5.99993	115.385	115.385	0	684	60.3119	61.6647	1.35286	133.333	130.435	-2.89855
685	59.1844	54.0083	-5.17606	107.143	107.143	-2.17568e-11	685	57.0677	62.788	5.72033	115.385	115.385	0	685	58.3741	66.0867	7.71262	130.435	130.435	1.61151e-11
686	59.2359	67.1037	7.8678	107.143	107.143	-2.17568e-11	686	57.2418	60.1621	2.92029	117.647	117.647	0	686	59.5933	60.3086	0.715294	130.435	130.435	-1.61151e-11
687	59.0581	64.7186	5.66049	105.263	109.091	3.82775	687	57.5832	64.6513	7.06811	117.647	117.647	0	687	60.2758	63.2291	2.95327	133.333	133.333	0
688	59.5959	59.6668	0.0709147	107.143	103.448	-3.69458	688	55.2841	61.4787	6.19455	117.647	117.647	0	688	59.8887	63.694	3.80531	130.435	133.333	2.89855
689	59.9967	64.1555	4.15876	103.448	103.448	2.02789e-11	689	55.3772	58.48	3.10287	113.208	113.208	0	689	58.6531	61.1376	2.48459	133.333	133.333	0
690	58.2653	64.4989	6.23354	103.448	105.263	1.81488	690	55.9655	61.9718	6.00622	117.647	117.647	0	690	60.0575	62.5889	2.5314	130.435	127.66	-2.77521
691	60.311	62.3677	2.0567	101.695	100	-1.69492	691	54.6802	60.3489	5.66864	113.208	113.208	0	691	60.8695	63.0681	2.19852	122.449	125	2.55102
692	60.0637	65.8592	5.79543	100	101.695	1.69492	692	56.1195	59.4881	3.36866	113.208	113.208	0	692	60.103	59.901	-0.202061	139.535	139.535	0
693	59.397	63.6922	4.2952	101.695	101.695	0	693	54.9573	61.1729	6.21556	115.385	115.385	0	693	58.131	56.769	-1.36201	139.535	139.535	0
694	59.1062	63.8843	4.77807	101.695	101.695	-1.95968e-11	694	54.6395	58.7464	4.10686	117.647	117.647	0	694	60.5031	66.2014	5.69829	139.535	136.364	-3.17125
695	58.049	61.4828	3.43375	107.143	107.143	2.17568e-11	695	59.6386	56.1881	-3.45048	117.647	117.647	0	695	59.7405	67.8069	8.06643	146.341	146.341	-2.02931e-11
696	58.7834	62.431	3.64762	101.695	101.695	0	696	58.6988	62.8432	4.14443	117.647	117.647	0	696	61.0454	60.9041	-0.141253	139.535	142.857	3.32226
697	59.1563	64.5337	5.37743	105.263	105.263	-2.10036e-11	697	58.8855	70.6954	11.8099	115.385	113.208	-2.17707	697	59.0827	59.7606	0.677864	136.364	139.535	3.17125
698	58.8962	63.7485	4.85233	109.091	109.091	2.25526e-11	698	57.8996	58.3265	0.426889	117.647	117.647	0	698	58.7245	60.1064	1.38184	139.535	136.364	-3.17125
699	57.9883	60.8512	2.86282	109.091	109.091	0	699	58.4542	61.3232	2.86891	113.208	115.385	2.17707	699	60.552	65.4458	4.89376	125	125	0
700	58.7397	62.0621	3.32236	105.263	107.143	1.8797	700	57.9009	66.2519	8.35102	117.647	115.385	-2.26244	700	60.0531	61.3216	1.26845	133.333	133.333	0
701	58.8039	63.5546	4.75072	107.143	105.263	-1.8797	701	57.7854	61.1637	3.37829	117.647	117.647	0	701	59.924	60.8673	0.943332	133.333	133.333	-1.68257e-11
702	58.8065	62.7947	3.98825	103.448	103.448	0	702	57.2623	61.4718	4.20951	117.647	120	2.35294	702	59.464	61.6996	2.2356	136.364	136.364	0
703	59.0548	62.7167	3.66188	103.448	103.448	-2.02789e-11	703	58.9807	66.1121	7.13137	117.647	115.385	-2.26244	703	58.5211	62.2418	3.72071	139.535	139.535	1.84457e-11
704	59.0039	62.9304	3.92643	105.263	105.263	2.10036e-11	704	57.8337	60.2123	2.37855	115.385	115.385	0	704	59.3034	59.9734	0.669946	127.66	130.435	2.77521
705	57.6922	64.4103	6.7181	103.448	103.448	0	705	59.1715	64.1689	4.99741	117.647	117.647	0	705	60.0226	59.9585	-0.0641094	127.66	130.435	2.77521
706	56.1052	59.6392	3.534	103.448	105.263	1.81488	706	56.9243	63.9812	7.05695	115.385	117.647	2.26244	706	59.1882	63.6663	4.47811	127.66	122.449	-5.21059
707	57.3027	62.2202	4.91753	105.263	105.263	2.10036e-11	707	56.6385	60.8852	4.24671	122.449	120	-2.44898	707	57.9354	60.7026	2.7672	127.66	130.435	2.77521
708	59.2117	60.4287	1.21691	101.695	100	-1.69492	708	56.1308	60.7595	4.62869	117.647	120	2.35294	708	57.7582	57.9524	0.194208	130.435	130.435	0
709	59.8001	62.2018	2.40164	101.695	101.695	0	709	58.2135	61.7824	3.56889	120	117.647	-2.35294	709	59.3114	61.2108	1.89948	127.66	127.66	0
710	60.0349	66.2856	6.25064	101.695	101.695	1.95968e-11	710	57.7391	62.9697	5.23065	115.385	117.647	2.26244	710	58.7637	62.4202	3.65641	127.66	130.435	2.77521
711	59.5045	60.6995	1.19502	98.3607	98.3607	0	711	57.6965	62.5979	4.90142	120	117.647	-2.35294	711	58.5721	58.1099	-0.462197	127.66	127.66	0
712	59.0224	65.3837	6.36131	103.448	103.448	-2.02789e-11	712	58.4454	63.7654	5.31998	120	120	0	712	57.8058	61.2756	3.46982	125	127.66	2.65957
713	60.793	49.6626	-11.1304	101.695	100	-1.69492	713	59.0149	64.5979	5.58298	120	120	0	713	59.223	62.8944	3.67145	133.333	125	-8.33333
714	60.3468	78.0592	17.7123	101.695	100	-1.69492	714	57.7501	61.2491	3.49904	120	120	0	714	59.438	61.9697	2.53165	120	122.449	2.44898
715	58.9142	66.2379	7.32363	109.091	111.111	2.0202	715	57.6431	63.7314	6.08836	120	122.449	2.44898	715	61.089	62.9996	1.91054	125	125	0
716	58.9872	56.6504	-2.3368	109.091	111.111	2.0202	716	59.1454	63.688	4.54251	122.449	120	-2.44898	716	59.4037	61.6765	2.27278	130.435	130.435	0
717	58.3671	64.2625	5.89545	111.111	109.091	-2.0202	717	59.0882	63.3115	4.22331	120	122.449	2.44898	717	58.3103	58.4935	0.183228	125	125	0
718	59.0569	62.711	3.65408	111.111	111.111	0	718	59.1993	63.8134	4.6141	120	120	0	718	59.7156	62.8227	3.10703	122.449	122.449	0
719	58.9396	61.6999	2.76032	107.143	109.091	1.94805	719	58.4106	63.8986	5.48794	120	120	0	719	60.8263	65.1176	4.29133	125	122.449	-2.55102
720	59.2656	64.0642	4.79863	107.143	105.263	-1.8797	720	57.338	61.5368	4.19882	122.449	122.449	0	720	58.9399	58.0549	-0.885052	136.364	136.364	0
721	58.4937	62.3225	3.82882	107.143	107.143	-2.17568e-11	721	58.5422	62.494	3.95179	122.449	122.449	0	721	58.7976	55.7983	-2.99927	136.364	136.364	0
722	58.1339	62.9686	4.83469	105.263	105.263	2.10036e-11	722	58.6126	64.3013	5.68877	120	120	0	722	61.0006	65.9992	4.99856	136.364	133.333	-3.0303
723	55.8423	61.8951	6.05286	105.263	105.263	0	723	59.0312	58.7398	-0.291417	122.449	125	2.55102	723	60.3773	67.3078	6.93047	130.435	133.333	2.89855
724	57.1935	59.0656	1.87209	103.448	103.448	-2.02789e-11	724	57.9533	59.2074	1.25416	122.449	125	2.55102	724	59.0818	58.0444	-1.03731	130.435	130.435	0
725	55.8528	62.6606	6.8078	100	101.695	1.69492	725	59.3528	67.2498	7.89699	122.449	122.449	0	725	59.4962	61.8811	2.38491	130.435	130.435	-1.61151e-11
726	55.8309	59.506	3.67502	101.695	101.695	0	726	59.4879	64.3908	4.90287	122.449	120	-2.44898	726	59.2046	67.3208	8.11623	133.333	133.333	1.68257e-11
727	55.7678	58.7327	2.96486	101.695	101.695	-1.95968e-11	727	57.6939	62.9849	5.291	117.647	120	2.35294	727	59.7467	62.5204	2.77371	130.435	130.435	0
728	57.4884	61.7173	4.22892	103.448	101.695	-1.75336	728	58.8835	59.6175	0.73401	120	120	0	728	60.3345	62.9185	2.58402	133.333	133.333	0
729	55.204	59.2627	4.0587	98.3607	100	1.63934	729	58.8292	64.1527	5.32352	122.449	120	-2.44898	729	60.3353	64.7648	4.4295	130.435	130.435	-1.61151e-11
730	55.0927	58.9636	3.87094	100	100	0	730	58.9096	63.2805	4.37085	115.385	115.385	0	730	60.1084	63.1613	3.05296	136.364	136.364	1.7593e-11
731	54.7385	59.5945	4.85599	101.695	101.695	-1.95968e-11	731	60.4779	66.9448	6.46689	117.647	120	2.35294	731	59.4865	63.2305	3.74399	136.364	136.364	0
732	53.852	57.6306	3.77859	103.448	101.695	-1.75336	732	59.0716	62.1044	3.03278	117.647	120	2.35294	732	59.1568	61.0885	1.93174	133.333	133.333	0
733	55.3719	58.8035	3.43161	103.448	103.448	2.02789e-11	733	59.7579	63.7143	3.95641	117.647	115.385	-2.26244	733	59.0713	60.7308	1.65953	133.333	133.333	0
734	54.5772	60.0556	5.47842	103.448	105.263	1.81488	734	59.103	63.7126	4.60958	120	122.449	2.44898	734	58.779	65.3051	6.52608	127.66	127.66	-1.54472e-11
735	56.3575	58.2754	1.91787	105.263	103.448	-1.81488	735	60.2197	65.2684	5.0487	117.647	115.385	-2.26244	735	59.7604	64.4978	4.7374	130.435	130.435	1.61151e-11
736	56.8009	56.4308	-0.370143	101.695	101.695	0	736	60.195	64.6284	4.43346	115.385	115.385	0	736	59.2143	61.1169	1.90258	133.333	133.333	0
737	56.236	63.1616	6.92556	101.695	101.695	0	737	59.9142	65.4359	5.52162	115.385	115.385	0	737	59.4147	62.2151	2.80034	130.435	130.435	-1.61151e-11
738	53.0321	58.9886	5.95641	103.448	105.263	1.81488	738	58.6691	64.7688	6.09965	120	120	0	738	59.7165	67.1558	7.43926	127.66	127.66	1.54472e-11
739	55.3958	57.3653	1.96954	103.448	103.448	-2.02789e-11	739	59.9663	62.8315	2.86513	117.647	117.647	-2.6219e-11	739	59.2878	62.5994	3.31156	133.333	133.333	0
740	54.4121	57.4558	3.04364	103.448	103.448	2.02789e-11	740	59.7548	64.1697	4.41496	120	117.647	-2.35294	740	58.4825	61.9662	3.48366	127.66	127.66	0
741	53.0756	58.5843	5.50878	105.263	105.263	0	741	59.9637	65.8347	5.87102	117.647	117.647	0	741	58.8436	60.8871	2.04354	133.333	133.333	0
742	54.6864	56.829	2.1426	100	101.695	1.69492	742	59.8823	62.8773	2.99498	117.647	120	2.35294	742	58.3837	63.8743	5.49062	125	125	0
							743	59.3548	65.374	6.01914	120	120	0	743	59.3036	63.827	4.52343	130.435	130.435	0
							744	58.9539	65.003	6.04912	120	117.647	-2.35294	744	59.1339	63.6764	4.54254	125	125	0
							745	59.9626	62.2382	2.27562	120	122.449	2.44898	745	59.504	62.6947	3.19069	127.66	130.435	2.77521
							746	59.8214	66.6626	6.84121	117.647	117.647	0	746	58.8422	64.1758	5.33361	127.66	127.66	0
							747	59.8572	64.2939	4.43669	120	120	0	747	60.8982	66.4831	5.58498	130.435	125	-5.43478
							748	58.5455	63.2866	4.74101	120	120	0	748	59.9715	59.3818	-0.58965	133.333	133.333	1.68257e-11
							749	58.7569	64.7358	5.9789	117.647	117.647	0	749	60.5954	58.3786	-2.21679	133.333	133.333	1.68257e-11
							750	58.4412	62.7753	4.33408	122.449	122.449	0	750	59.6585	67.0525	7.39401	130.435	127.66	-2.77521
							751	60.0818	59.2417	-0.840119	120	122.449	2.44898	751	60.0603	64.4954	4.43509	127.66	130.435	2.77521
							752	59.8447	64.3883	4.54353	120	122.449	2.44898	752	59.184	61.5586	2.37458	127.66	130.435	2.77521
							753	59.571	66.8455	7.27452	117.647	117.647	0	753	58.9135	62.4542	3.54069	130.435	127.66	-2.77521
							754	58.924	63.4137	4.48972	120	117.647	-2.35294	754	57.7115	63.4071	5.69556	130.435	130.435	1.61151e-11
							755	59.0781	62.2103	3.13222	117.647	120	2.35294	755	57.9593	60.5667	2.60739	127.66	130.435	2.77521
							756	58.619	63.4609	4.84186	120	120	0	756	59.6715	62.4379	2.76643	127.66	127.66	0
							757	56.7838	62.1353	5.35156	122.449	122.449	0	757	58.9942	63.5767	4.58256	127.66	127.66	0
							758	60.6144	63.1373	2.52291	117.647	115.385	-2.26244	758	61.0475	66.5442	5.49666	125	122.449	-2.55102
							759	60.5004	67.0525	6.5521	115.385	117.647	2.26244	759	60.0434	64.0109	3.9675	125	125	0
							760	59.687	67.4791	7.79206	120	117.647	-2.35294	760	58.6403	61.8377	3.19743	127.66	130.435	2.77521
							761	59.6275	61.9998	2.37223	120	122.449	2.44898	761	59.4767	65.5097	6.03304	125	125	2.96012e-11
							762	59.326	66.4623	7.13633	122.449	120	-2.44898	762	55.8726	62.6015	6.72891	122.449	122.449	0
							763	58.6434	61.8786	3.23517	120	122.449	2.44898	763	58.2477	60.6265	2.37881	120	120	0
							764	59.4633	60.72	1.25667	117.647	117.647	2.6219e-11	764	56.8927	62.8267	5.93404	125	122.449	-2.55102
							765	60.0179	68.6885	8.67064	115.385	113.208	-2.17707	765	55.9138	61.1199	5.20608	127.66	130.435	2.77521
							766	59.5915	62.5747	2.98321	117.647	117.647	0	766	56.7094	60.1336	3.42421	127.66	125	-2.65957
							767	57.9973	63.4442	5.44686	113.208	115.385	2.17707	767	56.3334	60.0372	3.70376	122.449	125	2.55102
							768	57.1538	61.2052	4.05147	117.647	117.647	0	768	57.3142	61.6189	4.3047	130.435	127.66	-2.77521
							769	57.7086	63.9178	6.20921	117.647	115.385	-2.26244	769	57.2788	62.8367	5.55785	120	122.449	2.44898
							770	58.0257	61.2173	3.19159	113.208	115.385	2.17707	770	57.9089	59.044	1.13515	125	125	0
							771	58.4068	62.3838	3.97698	120	117.647	-2.35294	771	58.108	61.8502	3.74215	125	125	-2.96012e-11
							772	59.6093	65.1573	5.54808	120	122.449	2.44898	772	58.3493	64.0777	5.72846	125	125	0
							773	59.6854	64.0389	4.35349	115.385	115.385	2.52243e-11	773	58.8478	61.5798	2.73205	125	125	0
							774	59.5322	66.666	7.13373	120	117.647	-2.35294	774	57.5911	63.8789	6.28779	125	125	0
							775	59.1362	64.179	5.04277	122.449	122.449	-2.84075e-11	775	60.5038	62.15	1.64613	125	125	2.96012e-11
							776	58.9914	62.6753	3.68388	120	122.449	2.44898	776	57.4444	60.191	2.74656	130.435	130.435	0
							777	59.5209	63.5791	4.05821	120	117.647	-2.35294	777	59.3307	58.5086	-0.822072	130.435	130.435	0
							778	57.1075	64.0813	6.97382	125	125	0	778	58.3127	65.6306	7.31783	130.435	130.435	3.22302e-11
							779	57.053	54.2713	-2.78175	120	122.449	2.44898	779	57.9008	63.0946	5.19385	125	125	0
							780	58.9657	62.4436	3.47793	120	122.449	2.44898	780	59.0619	61.4707	2.40884	125	127.66	2.65957
							781	59.025	69.048	10.023	117.647	115.385	-2.26244	781	57.5422	62.9763	5.43417	125	122.449	-2.55102
							782	59.7784	62.0044	2.22608	117.647	120	2.35294	782	56.6569	61.3622	4.70534	127.66	127.66	0
							783	59.3917	63.6184	4.22673	115.385	115.385	2.52243e-11	783	57.9632	62.2063	4.24313	125	125	0
							784	58.0791	65.387	7.30793	113.208	113.208	0	784	59.2347	61.5439	2.30921	127.66	127.66	3.08802e-11
							785	57.7008	62.9326	5.2317	117.647	117.647	0	785	58.2752	62.7093	4.43419	127.66	127.66	-3.08802e-11
							786	56.5058	61.2272	4.72138	115.385	115.385	-2.52243e-11	786	58.3751	64.337	5.96188	125	127.66	2.65957
							787	51.9662	57.3581	5.39197	113.208	115.385	2.17707	787	57.319	60.5951	3.27608	127.66	125	-2.65957
							788	53.3194	57.5175	4.19802	111.111	109.091	-2.0202	788	54.7874	58.4775	3.69011	125	127.66	2.65957
							789	53.4039	58.7779	5.37401	117.647	117.647	0	789	56.0159	59.3021	3.2862	130.435	130.435	0
							790	54.7551	58.0714	3.31629	117.647	117.647	0	790	56.2623	60.9851	4.72289	127.66	127.66	-3.08802e-11
							791	56.78	60.4393	3.65937	120	117.647	-2.35294	791	55.8146	59.241	3.42647	127.66	125	-2.65957
							792	55.093	60.9718	5.87882	120	120	0	792	55.201	59.4301	4.22903	125	127.66	2.65957
							793	55.4233	59.4177	3.9944	117.647	120	2.35294	793	55.7725	57.6239	1.85141	125	125	0
							794	56.0336	58.8752	2.84159	120	120	0	794	59.2546	61.516	2.26137	125	122.449	-2.55102
							795	58.4744	63.0249	4.55049	120	120	0	795	59.0525	64.3227	5.27019	130.435	130.435	-3.22302e-11
							796	59.6742	61.7424	2.06817	117.647	117.647	0	796	59.0167	60.9345	1.91775	125	127.66	2.65957
							797	57.8812	63.1215	5.24034	117.647	117.647	-2.6219e-11	797	60.3107	64.4962	4.18553	130.435	127.66	-2.77521
							798	57.7835	61.2312	3.44773	120	117.647	-2.35294	798	59.4466	64.4366	4.98993	122.449	125	2.55102
							799	58.085	63.0825	4.9975	115.385	117.647	2.26244	799	60.0629	62.8552	2.79229	127.66	127.66	-3.08802e-11
							800	57.5403	61.0509	3.51064	120	122.449	2.44898	800	59.1626	67.4721	8.30944	127.66	125	-2.65957
							801	57.9291	60.8104	2.88126	120	117.647	-2.35294	801	59.0593	60.7483	1.68906	130.435	130.435	0
							802	57.6576	62.5181	4.86045	117.647	117.647	0	802	59.5847	59.1741	-0.41061	125	127.66	2.65957
							803	57.1456	60.9275	3.78184	122.449	122.449	0	803	60.0589	67.3133	7.25441	130.435	127.66	-2.77521
							804	57.273	61.9001	4.62715	120	120	0	804	60.0218	59.693	-0.328842	133.333	130.435	-2.89855
							805	57.0915	60.6575	3.566	120	120	0	805	60.2207	61.9083	1.68759	133.333	130.435	-2.89855
							806	59.0671	60.7392	1.67209	120	120	0	806	59.2026	65.1887	5.98608	136.364	136.364	0
							807	59.1885	58.6782	-0.510305	117.647	117.647	2.6219e-11	807	59.7531	62.1826	2.42947	130.435	130.435	3.22302e-11
							808	58.5559	64.5709	6.01501	117.647	117.647	2.6219e-11	808	60.3141	65.1379	4.82387	133.333	133.333	-3.36797e-11
							809	59.471	66.4927	7.02173	113.208	113.208	0	809	60.6169	65.9642	5.34725	130.435	130.435	0
							810	57.7361	63.0245	5.2884	117.647	117.647	0	810	59.9561	62.8342	2.87809	133.333	133.333	3.36797e-11
							811	57.5959	61.6469	4.05102	113.208	113.208	-2.42864e-11	811	59.7371	61.9913	2.25423	133.333	133.333	-3.36797e-11
							812	58.5263	64.7667	6.24041	117.647	117.647	0	812	59.9225	64.3763	4.45374	130.435	133.333	2.89855
							813	58.6223	62.0241	3.40179	113.208	115.385	2.17707	813	60.2781	65.1576	4.87955	130.435	127.66	-2.77521
							814	56.7478	63.0175	6.26978	120	117.647	-2.35294	814	59.8687	63.3002	3.4316	127.66	127.66	-3.08802e-11
							815	59.5406	60.9991	1.45848	111.111	111.111	2.34053e-11	815	60.1241	64.4417	4.31757	130.435	130.435	0
							816	58.2709	67.0059	8.73508	115.385	115.385	0	816	60.1851	63.6927	3.50755	130.435	133.333	2.89855
							817	58.4512	62.4989	4.04767	117.647	115.385	-2.26244	817	59.6643	61.9954	2.3311	130.435	130.435	-3.22302e-11
							818	57.8415	62.4994	4.65798	115.385	117.647	2.26244	818	58.8423	63.6365	4.79421	133.333	130.435	-2.89855
							819	57.8976	62.5429	4.64528	120	120	0	819	59.1092	60.9189	1.80976	130.435	133.333	2.89855
							820	58.7635	63.5617	4.79824	117.647	117.647	0	820	59.7397	63.1848	3.44508	133.333	130.435	-2.89855
							821	57.3618	62.0826	4.7208	113.208	111.111	-2.09644	821	60.4962	63.4826	2.9864	130.435	130.435	0
							822	57.2197	61.1104	3.89073	117.647	120	2.35294	822	59.4834	64.4925	5.00906	127.66	127.66	3.08802e-11
							823	58.9843	64.1654	5.18118	113.208	113.208	0	823	59.3839	61.8183	2.43439	130.435	133.333	2.89855
							824	58.5563	64.208	5.65167	117.647	115.385	-2.26244	824	58.8705	62.1113	3.24078	130.435	130.435	0
							825	57.6327	62.24	4.60736	117.647	117.647	-2.6219e-11	825	59.0341	62.7835	3.74935	127.66	127.66	3.08802e-11
							826	56.2652	59.5733	3.30806	117.647	122.449	4.80192	826	58.9419	61.1626	2.22075	127.66	127.66	0
							827	58.7371	63.8383	5.10115	120	117.647	-2.35294	827	59.7484	61.6509	1.90251	130.435	127.66	-2.77521
							828	58.576	62.1592	3.58316	120	120	0	828	59.3313	64.8694	5.53811	130.435	133.333	2.89855
							829	59.5274	64.2312	4.70383	120	117.647	-2.35294	829	59.3266	61.7955	2.46892	130.435	130.435	0
							830	58.7641	63.3762	4.61206	115.385	117.647	2.26244	830	59.5928	63.7408	4.14794	130.435	127.66	-2.77521
							831	57.8656	63.1972	5.33158	122.449	120	-2.44898	831	60.4453	64.1494	3.70411	130.435	130.435	0
							832	58.7073	63.6489	4.94162	117.647	117.647	0	832	59.7999	58.7417	-1.05817	133.333	130.435	-2.89855
							833	59.0617	62.915	3.85327	120	122.449	2.44898	833	59.9243	61.538	1.61377	133.333	130.435	-2.89855
							834	59.277	64.1259	4.849	122.449	120	-2.44898	834	59.4055	65.8064	6.40089	130.435	130.435	3.22302e-11
							835	58.4435	54.7531	-3.69048	120	117.647	-2.35294	835	59.5671	64.3179	4.75077	136.364	136.364	-3.52145e-11
							836	59.8144	65.235	5.42063	120	117.647	-2.35294	836	60.2836	62.8959	2.61225	133.333	133.333	0
							837	59.3886	66.8882	7.4996	122.449	125	2.55102	837	59.4772	60.851	1.37374	133.333	133.333	3.36797e-11
							838	59.4337	64.0223	4.58863	122.449	120	-2.44898	838	60.3964	64.4711	4.07467	130.435	130.435	-3.22302e-11
							839	58.6162	61.1715	2.55533	122.449	125	2.55102	839	60.4492	65.2719	4.82264	130.435	130.435	0
							840	58.4076	62.9961	4.58845	125	125	0	840	59.6848	64.7814	5.09657	130.435	130.435	3.22302e-11
							841	58.7781	63.9831	5.20497	125	122.449	-2.55102	841	58.445	59.8073	1.36234	133.333	136.364	3.0303
							842	57.2874	62.6048	5.31739	117.647	120	2.35294	842	57.1831	59.3696	2.18654	133.333	130.435	-2.89855
							843	59.4165	62.011	2.59451	125	122.449	-2.55102	843	59.9354	64.9194	4.98394	130.435	133.333	2.89855
							844	57.9408	63.426	5.48525	120	122.449	2.44898	844	59.3938	65.1027	5.70885	127.66	127.66	0
							845	57.802	61.1827	3.38069	120	120	0	845	57.606	58.417	0.810932	127.66	127.66	0
							846	58.4541	61.876	3.42191	117.647	117.647	-2.6219e-11	846	58.4502	62.7906	4.34045	127.66	127.66	3.08802e-11
							847	57.678	62.0944	4.41636	117.647	120	2.35294	847	58.2886	64.946	6.65741	130.435	127.66	-2.77521
							848	57.8263	60.8051	2.97878	120	117.647	-2.35294	848	59.3566	59.9115	0.554901	125	127.66	2.65957
							849	58.62	63.1312	4.51122	120	120	0	849	59.6452	63.4657	3.82055	130.435	127.66	-2.77521
							850	58.0065	61.8179	3.81138	117.647	117.647	0	850	59.7181	65.437	5.71888	127.66	130.435	2.77521
							851	57.9924	62.3873	4.39489	117.647	117.647	0	851	59.6559	63.9433	4.28742	130.435	130.435	-3.22302e-11
							852	57.8415	62.6768	4.8353	120	120	0	852	58.9182	59.9382	1.01999	133.333	133.333	0
							853	57.8118	62.2679	4.45613	120	120	0	853	59.0708	62.2552	3.18434	130.435	127.66	-2.77521
							854	58.4484	61.8612	3.41281	120	120	0	854	60.1047	61.1292	1.02449	133.333	133.333	-3.36797e-11
							855	57.8019	62.1296	4.32779	120	120	0	855	60.1447	60.3375	0.192814	130.435	133.333	2.89855
							856	58.3824	60.9232	2.54087	122.449	122.449	0	856	59.5447	63.596	4.05133	130.435	130.435	0
							857	59.2394	62.5985	3.35907	122.449	122.449	0	857	59.7309	66.2131	6.48216	130.435	127.66	-2.77521
							858	58.9452	63.0797	4.13452	122.449	120	-2.44898	858	59.7081	59.3591	-0.349	125	127.66	2.65957
							859	58.7849	62.8293	4.0443	122.449	122.449	0	859	58.1613	62.0183	3.85698	133.333	130.435	-2.89855
							860	59.45	62.3241	2.87409	122.449	125	2.55102	860	59.9021	58.1191	-1.78301	127.66	127.66	3.08802e-11
														861	60.295	63.3043	3.00931	127.66	127.66	3.08802e-11
														862	59.9465	66.7697	6.82324	125	125	0
														863	58.7166	63.2611	4.54444	125	125	0
														864	58.9143	60.4886	1.57434	130.435	133.333	2.89855
														865	59.4834	64.5441	5.06075	133.333	130.435	-2.89855
														866	58.4665	63.8147	5.34822	127.66	127.66	0
														867	55.6084	60.4726	4.86418	130.435	130.435	-3.22302e-11
														868	56.3355	58.0048	1.66929	125	127.66	2.65957
														869	58.6155	62.6254	4.00987	125	122.449	-2.55102
														870	54.9785	62.7134	7.73494	127.66	127.66	3.08802e-11
														871	55.033	57.03	1.99707	127.66	127.66	-3.08802e-11
														872	56.8904	58.8748	1.98436	127.66	127.66	0
														873	56.4407	62.6795	6.23878	130.435	130.435	0
														874	57.707	58.5519	0.844822	125	127.66	2.65957
														875	57.2854	61.0322	3.74679	130.435	130.435	-3.22302e-11
														876	57.7724	61.9956	4.22322	125	125	0
														877	56.2604	59.2615	3.0011	127.66	127.66	0
														878	57.6171	59.4675	1.85046	130.435	127.66	-2.77521
														879	56.798	60.8895	4.09152	127.66	130.435	2.77521
														880	57.9612	60.1723	2.21109	127.66	125	-2.65957
														881	57.5026	60.7336	3.23103	125	127.66	2.65957
														882	59.7281	62.9391	3.211	133.333	130.435	-2.89855
														883	58.3434	62.0081	3.66468	130.435	130.435	-3.22302e-11
														884	58.0207	60.6583	2.63755	130.435	133.333	2.89855
														885	58.2822	60.8293	2.54718	125	125	2.96012e-11
														886	59.1177	62.9031	3.7854	127.66	127.66	0
														887	58.3654	62.5535	4.18815	130.435	130.435	-3.22302e-11
														888	58.1854	55.5925	-2.5929	133.333	130.435	-2.89855
														889	56.8764	58.9146	2.0382	133.333	130.435	-2.89855
														890	58.1798	63.8864	5.70661	127.66	130.435	2.77521
														891	57.0824	62.0515	4.96911	133.333	130.435	-2.89855
														892	57.9125	58.7314	0.8189	130.435	133.333	2.89855
														893	58.293	60.0335	1.74053	125	125	2.96012e-11
														894	58.6064	64.2362	5.62974	127.66	127.66	0
														895	58.1821	63.5224	5.34028	127.66	127.66	-3.08802e-11
														896	56.7442	59.9258	3.18151	125	125	0
														897	55.5984	59.1308	3.53241	125	125	0
														898	55.2299	61.1844	5.95447	125	122.449	-2.55102
														899	56.1456	60.3154	4.16976	127.66	127.66	3.08802e-11
														900	56.1954	59.0621	2.86672	130.435	133.333	2.89855
														901	55.8775	58.2652	2.38777	125	127.66	2.65957
														902	56.0428	58.4497	2.40684	130.435	127.66	-2.77521
														903	55.0894	61.5805	6.49107	125	125	0
														904	55.4745	59.9819	4.50735	122.449	125	2.55102
														905	56.2429	58.1433	1.90033	127.66	125	-2.65957
														906	56.571	60.9452	4.37426	122.449	122.449	0
														907	57.3221	60.017	2.69491	127.66	127.66	0
														908	57.7562	62.3252	4.56897	127.66	127.66	3.08802e-11
														909	57.1539	62.6719	5.51805	130.435	127.66	-2.77521
														910	56.9398	56.8241	-0.115657	127.66	133.333	5.67376
														911	56.6067	60.6228	4.01607	130.435	127.66	-2.77521
														912	55.8791	60.6318	4.75272	127.66	130.435	2.77521
														913	58.0341	59.2401	1.20606	122.449	122.449	0
														914	57.1558	62.3208	5.16505	125	122.449	-2.55102
														915	57.8273	63.1564	5.3291	127.66	127.66	0
														916	54.4723	53.0122	-1.4601	125	120	-5
														917	55.0886	60.3182	5.22962	125	120	-5
														918	58.5915	65.2339	6.64244	117.647	120	2.35294
														919	57.7638	62.0539	4.29008	125	125	2.96012e-11
														920	57.3848	59.5017	2.11696	125	122.449	-2.55102
														921	57.2989	61.2771	3.97819	122.449	125	2.55102
														922	55.5754	60.7891	5.2137	127.66	125	-2.65957
														923	56.8814	60.7336	3.85217	122.449	125	2.55102
														924	55.7973	59.0981	3.30078	122.449	122.449	0
														925	55.1612	57.5851	2.42387	122.449	122.449	0
														926	55.3538	61.1064	5.7526	122.449	122.449	0
														927	53.3296	58.3376	5.00804	125	125	0
														928	55.5607	58.546	2.98527	127.66	125	-2.65957
														929	55.857	58.7247	2.86772	122.449	122.449	0
														930	56.011	59.9416	3.93069	122.449	125	2.55102
														931	56.7267	59.1752	2.44847	122.449	122.449	0
														932	55.0121	60.1131	5.10104	130.435	130.435	-3.22302e-11
														933	57.1738	59.0404	1.86654	125	122.449	-2.55102
														934	58.3591	62.5454	4.18639	125	125	2.96012e-11
														935	58.3811	61.78	3.39891	127.66	127.66	0

## Sheet: Couple 3
CC Number	Depth GS	Depth Est	Depth error	Rate GS	Rate Est	Rate error	CC Number	Depth GS	Depth Est	Depth error	Rate GS	Rate Est	Rate error	CC Number	Depth GS	Depth Est	Depth error	Rate GS	Rate Est	Rate error	CC Number	Depth GS	Depth Est	Depth error	Rate GS	Rate Est	Rate error
1	58.5007	61.3973	2.89658	100	96.7742	-3.22581	1	59.2844	63.3582	4.07382	130.435	130.435	0	1	60.8265	67.7141	6.8876				1	60.9081	67.7607	6.85255	82.1918	96.7742	14.5824
2	60.5861	72.944	12.3579	100	96.7742	-3.22581	2	58.4239	62.9502	4.52632	130.435	130.435	0	2	60.5078	78.3447	17.8369	150	153.846	3.84615	2	58.7919	60.9754	2.18351	82.1918	96.7742	14.5824
3	60.0092	78.491	18.4818	100	101.695	1.69492	3	60.196	60.3934	0.197336	133.333	130.435	-2.89855	3	60.9328	63.2484	2.31555	150	153.846	3.84615	3	60.1076	59.6346	-0.473033	80	69.7674	-10.2326
4	60.4529	58.2457	-2.20716	95.2381	95.2381	0	4	60.3208	66.2122	5.89147	130.435	127.66	-2.77521	4	60.19	59.2817	-0.908313	146.341	142.857	-3.48432	4	60.3868	68.0036	7.61678	80	81.0811	1.08108
5	60.6109	73.3048	12.6939	98.3607	96.7742	-1.58646	5	59.3038	62.9606	3.65675	127.66	130.435	2.77521	5	60.4557	56.5388	-3.91694	146.341	150	3.65854	5	61.0206	63.6851	2.66451	81.0811	80	-1.08108
6	59.4769	75.1169	15.6399	101.695	101.695	0	6	58.5406	55.213	-3.32753	133.333	133.333	0	6	59.9571	70.385	10.4279	146.341	146.341	1.25056e-12	6	60.6548	66.725	6.07016	76.9231	78.9474	2.02429
7	59.2818	53.7964	-5.48548	98.3607	100	1.63934	7	56.8679	55.5865	-1.28149	136.364	139.535	3.17125	7	60.104	65.2729	5.16887	146.341	142.857	-3.48432	7	60.162	63.7877	3.62568	76.9231	78.9474	2.02429
8	60.0524	83.9344	23.882	93.75	92.3077	-1.44231	8	57.1043	59.6901	2.58577	133.333	133.333	5.11591e-13	8	59.8093	59.3009	-0.50834	139.535	146.341	6.80658	8	60.3955	64.4673	4.07182	77.9221	77.9221	0
9	58.4639	59.4969	1.03309	96.7742	98.3607	1.58646	9	58.1924	63.1666	4.97425	139.535	136.364	-3.17125	9	60.4954	61.8823	1.38692	142.857	139.535	-3.32226	9	59.6597	71.5238	11.8641	84.507	84.507	0
10	60.0928	71.5032	11.4104	95.2381	93.75	-1.4881	10	60.2207	62.6399	2.41929	139.535	139.535	0	10	60.4705	68.2717	7.80126	146.341	142.857	-3.48432	10	60.2547	62.4819	2.22722	84.507	84.507	0
11	61.0203	79.8113	18.791	98.3607	98.3607	0	11	60.976	58.3296	-2.64641	133.333	130.435	-2.89855	11	59.8125	62.8758	3.06331	139.535	142.857	3.32226	11	58.8623	63.8	4.93768	81.0811	81.0811	0
12	61.0154	63.3668	2.35144	96.7742	98.3607	1.58646	12	61.2738	58.5541	-2.71973	133.333	130.435	-2.89855	12	60.6824	62.8706	2.18813	146.341	146.341	0	12	60.7487	67.3781	6.62941	85.7143	84.507	-1.20724
13	60.8131	69.931	9.11783	103.448	103.448	-6.25278e-13	13	61.1685	64.6348	3.46631	130.435	130.435	0	13	60.4111	65.2504	4.8393	146.341	142.857	-3.48432	13	59.407	64.0913	4.6843	82.1918	83.3333	1.14155
14	60.8541	63.2379	2.3839	103.448	103.448	-6.25278e-13	14	60.6033	65.4304	4.82712	122.449	125	2.55102	14	60.342	61.425	1.08298	142.857	146.341	3.48432	14	59.3089	66.9748	7.66586	83.3333	83.3333	0
15	58.64	75.1257	16.4857	93.75	96.7742	3.02419	15	58.225	60.5155	2.29053	127.66	127.66	0	15	60.5622	63.1222	2.55998	142.857	142.857	-1.22213e-12	15	59.4306	63.1753	3.74469	82.1918	84.507	2.31526
16	59.8271	61.5236	1.69652	95.2381	95.2381	0	16	58.7086	60.1969	1.48826	125	127.66	2.65957	16	60.3062	69.2798	8.97355	146.341	142.857	-3.48432	16	58.4758	67.7932	9.3175	82.1918	81.0811	-1.1107
17	57.9528	69.6598	11.707	96.7742	96.7742	0	17	60.3801	60.3397	-0.0404088	130.435	130.435	-1.02318e-12	17	59.9134	62.1418	2.22837	139.535	142.857	3.32226	17	60.4014	61.5595	1.15812	82.1918	81.0811	-1.1107
18	60.8698	66.5806	5.71083	93.75	93.75	5.25802e-13	18	59.8402	70.2304	10.3903	125	122.449	-2.55102	18	60.6976	61.7728	1.07519	146.341	146.341	0	18	60.0414	68.2791	8.23775	83.3333	82.1918	-1.14155
19	60.624	77.9469	17.3229	93.75	92.3077	-1.44231	19	59.9151	62.2153	2.30015	127.66	127.66	9.66338e-13	19	61.0579	69.3733	8.31539	146.341	142.857	-3.48432	19	59.779	62.4995	2.72048	78.9474	80	1.05263
20	59.3957	63.4282	4.03251	96.7742	96.7742	-5.54223e-13	20	60.3415	64.1756	3.83406	127.66	125	-2.65957	20	60.6273	61.2738	0.646479	142.857	146.341	3.48432	20	59.9677	67.457	7.48928	80	81.0811	1.08108
21	58.772	64.0124	5.24044	96.7742	98.3607	1.58646	21	59.7775	64.1326	4.35507	127.66	130.435	2.77521	21	60.8055	57.6028	-3.2027	142.857	142.857	-1.22213e-12	21	60.4589	62.6721	2.21322	81.0811	82.1918	1.1107
22	59.2494	77.827	18.5776	96.7742	96.7742	5.54223e-13	22	61.2972	63.5108	2.21362	122.449	122.449	8.95284e-13	22	60.3222	67.6079	7.28579	146.341	146.341	0	22	60.349	69.1911	8.84213	80	76.9231	-3.07692
23	58.9356	49.2697	-9.66592	95.2381	95.2381	-5.25802e-13	23	60.065	63.0559	2.99082	127.66	127.66	0	23	60.5754	65.5063	4.93087	139.535	139.535	0	23	59.5502	62.8965	3.34632	81.0811	82.1918	1.1107
24	60.6223	77.9284	17.3061	98.3607	96.7742	-1.58646	24	59.7674	64.4582	4.69079	127.66	127.66	-9.66338e-13	24	60.5507	64.6125	4.06177	142.857	142.857	1.22213e-12	24	60.0885	63.139	3.05046	76.9231	77.9221	0.999001
25	60.8347	61.356	0.521315	103.448	103.448	0	25	60.2768	63.1047	2.82789	133.333	133.333	1.0516e-12	25	60.4457	64.1993	3.7536	142.857	142.857	-1.22213e-12	25	58.988	65.115	6.12698	80	78.9474	-1.05263
26	60.5343	75.3667	14.8323	98.3607	100	1.63934	26	60.297	64.7206	4.42362	133.333	133.333	0	26	60.8989	64.0631	3.16411	142.857	142.857	0	26	58.912	62.4442	3.53221	78.9474	80	1.05263
27	60.1315	66.3305	6.199	95.2381	93.75	-1.4881	27	60.7097	67.4998	6.79013	130.435	127.66	-2.77521	27	60.6578	65.5158	4.85797	139.535	139.535	0	27	59.7836	66.482	6.69837	82.1918	82.1918	-7.95808e-13
28	59.6442	72.3378	12.6937	93.75	93.75	-1.03739e-12	28	60.9643	58.3126	-2.6517	127.66	130.435	2.77521	28	60.9991	64.0513	3.0522	139.535	139.535	0	28	59.5293	62.3977	2.86841	76.9231	78.9474	2.02429
29	59.7147	70.6845	10.9698	100	100	0	29	60.5005	62.2639	1.76344	127.66	127.66	0	29	61.2999	67.6198	6.31982	142.857	142.857	0	29	60.5994	68.4522	7.85283	82.1918	77.9221	-4.2697
30	58.7534	58.8535	0.100027	98.3607	100	1.63934	30	60.3764	70.1142	9.73777	130.435	130.435	0	30	61.1548	66.4703	5.31554	142.857	142.857	0	30	59.0401	63.695	4.65495	75.9494	80	4.05063
31	58.3521	69.0284	10.6763	100	100	0	31	60.3448	62.8687	2.52387	125	125	0	31	60.9507	74.1115	13.1607	146.341	150	3.65854	31	59.4114	63.4922	4.0809	78.9474	78.9474	-7.38964e-13
32	59.4527	69.2943	9.84168	98.3607	98.3607	0	32	60.6169	62.2747	1.65782	127.66	127.66	0	32	60.3797	67.1464	6.7667	146.341	150	3.65854	32	61.1124	67.0995	5.98709	81.0811	76.9231	-4.158
33	59.2242	64.7631	5.53892	96.7742	96.7742	1.10845e-12	33	60.8613	67.0843	6.22301	125	125	0	33	59.8326	49.5504	-10.2822	146.341	146.341	0	33	60.7467	55.2705	-5.4762
34	59.9011	69.3629	9.46181	100	98.3607	-1.63934	34	61.1927	62.1774	0.984728	125	125	0	34	60.3984	60.962	0.563517	146.341	146.341	0	34	60.8864	75.4878	14.6014	78.9474	109.091	30.1435
35	60.0422	68.2927	8.25059	100	100	0	35	61.227	70.3992	9.17217	122.449	122.449	-8.95284e-13	35	60.77	73.7831	13.0131	142.857	142.857	0	35	60.0418	54.9627	-5.07905	78.9474	109.091	30.1435
36	60.6397	68.6192	7.97951	100	101.695	1.69492	36	61.2443	66.7713	5.52703	127.66	125	-2.65957	36	60.0071	61.3889	1.38184	142.857	146.341	3.48432	36	58.4379	68.75	10.3122	78.9474	65.9341	-13.0133
37	57.3567	66.32	8.96331	100	100	0	37	60.955	61.4855	0.530424	125	127.66	2.65957	37	59.9965	56.1492	-3.84735	142.857	142.857	2.41585e-12	37	59.2739	59.2592	-0.0146675	81.0811	77.9221	-3.159
38	61.2228	63.9815	2.75873	100	100	0	38	61.8955	65.8011	3.90561	125	122.449	-2.55102	38	59.8151	64.323	4.50793	142.857	139.535	-3.32226	38	59.6449	65.6382	5.99329	80	78.9474	-1.05263
39	60.3803	78.8499	18.4697	100	98.3607	-1.63934	39	61.2317	63.3658	2.1341	130.435	133.333	2.89855	39	60.3567	62.8149	2.45825	136.364	136.364	0	39	60.362	66.577	6.21503	80	78.9474	-1.05263
40	58.7916	55.6493	-3.14238	103.448	105.263	1.81488	40	61.3316	57.5486	-3.78305	130.435	133.333	2.89855	40	60.0224	66.9585	6.93607	139.535	139.535	0	40	60.2036	58.1869	-2.0167	77.9221	103.448	25.5262
41	59.5494	66.1684	6.61901	105.263	105.263	0	41	61.4001	63.4603	2.06021	130.435	127.66	-2.77521	41	60.2875	61.9376	1.6501	133.333	136.364	3.0303	41	57.082	69.1751	12.0931	81.0811	65.9341	-15.147
42	57.4624	58.3	0.837639	105.263	105.263	0	42	61.0416	69.1556	8.11398	136.364	136.364	0	42	59.6215	61.0387	1.41712	136.364	136.364	2.18847e-12	42	58.0017	51.9676	-6.03407	78.9474	101.695	22.7475
43	59.1619	66.2079	7.04594	101.695	100	-1.69492	43	60.9763	64.7234	3.74703	133.333	133.333	0	43	59.75	64.5748	4.82482	136.364	136.364	-2.18847e-12	43	60.0372	64.8645	4.82726	81.0811	64.5161	-16.565
44	56.4934	69.4831	12.9897	100	103.448	3.44828	44	61.1188	61.3657	0.246843	127.66	127.66	0	44	60.0348	62.4254	2.39061	136.364	136.364	0	44	59.2766	63.4776	4.20105	80	82.1918	2.19178
45	58.8942	58.8217	-0.0724405	100	100	1.19371e-12	45	61.418	65.0334	3.61536	127.66	127.66	0	45	58.9236	66.2694	7.34576	139.535	139.535	0	45	58.5878	57.0457	-1.54201	78.9474	100	21.0526
46	59.0601	72.1582	13.0981	100	100	0	46	61.1239	65.5166	4.39271	125	125	0	46	59.2254	60.7846	1.55923	139.535	139.535	2.33058e-12	46	59.6661	59.6228	-0.0432371	78.9474	80	1.05263
47	58.8636	66.0751	7.21146	98.3607	98.3607	0	47	60.661	60.1883	-0.47279	125	125	0	47	59.7137	65.0953	5.3816	136.364	136.364	0	47	60.0962	59.9444	-0.151783	78.9474	80	1.05263
48	59.4932	67.5735	8.0803	101.695	100	-1.69492	48	59.617	58.8597	-0.757238	125	130.435	5.43478	48	59.1125	63.9177	4.80518	139.535	139.535	0	48	60.871	68.5945	7.72342	80	63.8298	-16.1702
49	59.6948	64.7341	5.03925	101.695	101.695	0	49	60.7871	65.996	5.20896	130.435	125	-5.43478	49	59.9704	62.4081	2.43773	142.857	139.535	-3.32226	49	59.6617	63.703	4.04126	80	105.263	25.2632
50	60.2344	71.707	11.4726	101.695	101.695	0	50	60.4552	68.4312	7.97595	127.66	130.435	2.77521	50	59.5316	64.5591	5.02751	139.535	142.857	3.32226	50	59.9293	58.0337	-1.89557	80	105.263	25.2632
51	59.1861	64.511	5.32486	95.2381	98.3607	3.12256	51	60.4741	57.8147	-2.65948	130.435	133.333	2.89855	51	59.2509	62.6009	3.35007	146.341	142.857	-3.48432	51	57.5791	55.2711	-2.30808	77.9221	77.9221	0
52	59.3318	68.4797	9.14787	101.695	98.3607	-3.33426	52	60.2925	63.8995	3.60696	133.333	127.66	-5.67376	52	59.6349	63.4708	3.83588	139.535	142.857	3.32226	52	58.3433	55.2843	-3.05893	78.9474	78.9474	0
53	58.5775	64.2205	5.64301	98.3607	101.695	3.33426	53	60.9701	69.6638	8.69369	130.435	133.333	2.89855	53	59.417	64.5554	5.13836	146.341	142.857	-3.48432	53	59.5727	55.5098	-4.06289	78.9474	78.9474	0
54	60.3414	63.69	3.34856	101.695	101.695	0	54	60.1846	58.749	-1.43557	130.435	127.66	-2.77521	54	59.9398	64.161	4.22115	142.857	142.857	0	54	59.3849	64.8695	5.48466	81.0811	65.2174	-15.8637
55	60.4698	67.5621	7.09225	101.695	101.695	0	55	60.0313	64.3176	4.28626	130.435	133.333	2.89855	55	58.4717	63.934	5.46221	142.857	146.341	3.48432	55	59.6115	64.5678	4.9563	80	80	0
56	60.4641	68.4389	7.97479	100	100	0	56	60.4073	62.513	2.10572	130.435	130.435	0	56	59.5938	56.7088	-2.88507	146.341	142.857	-3.48432	56	58.1085	57.317	-0.791475	80	103.448	23.4483
57	60.5856	63.8173	3.23165	96.7742	95.2381	-1.5361	57	59.3605	63.0116	3.65114	133.333	136.364	3.0303	57	58.6804	65.8324	7.15203	142.857	142.857	0	57	57.9545	55.9165	-2.03795	78.9474	77.9221	-1.02529
58	60.7762	69.3407	8.5645	100	100	0	58	59.9462	62.7331	2.7869	133.333	130.435	-2.89855	58	59.6933	68.8443	9.15099	142.857	142.857	0	58	55.9993	62.9606	6.96123	78.9474	67.4157	-11.5316
59	60.601	71.9215	11.3205	100	100	-1.19371e-12	59	59.3351	66.1345	6.79938	133.333	133.333	2.10321e-12	59	60.1427	62.9706	2.82792	142.857	146.341	3.48432	59	57.357	53.1853	-4.17172	78.9474	98.3607	19.4133
60	60.4535	63.0732	2.61968	103.448	103.448	1.26477e-12	60	59.7667	63.8073	4.04069	130.435	130.435	-2.01794e-12	60	59.8524	63.8912	4.03878	150	150	0	60	57.0854	63.7331	6.64764	82.1918	66.6667	-15.5251
61	59.1744	68.5107	9.33628	95.2381	98.3607	3.12256	61	60.0141	61.498	1.48389	130.435	130.435	0	61	60.4439	57.6114	-2.83252	150	150	0	61	59.2062	52.9604	-6.24575	81.0811	103.448	22.3672
62	59.7596	63.5957	3.83614	103.448	101.695	-1.75336	62	60.3476	64.8815	4.5339	125	125	1.84741e-12	62	59.8728	58.9169	-0.955878	142.857	142.857	0	62	57.2451	55.6779	-1.56719	81.0811	80	-1.08108
63	60.2446	64.3038	4.05923	98.3607	98.3607	0	63	60.1715	68.2234	8.05193	130.435	130.435	0	63	61.0619	70.0531	8.99118	146.341	142.857	-3.48432	63	57.4668	61.6479	4.18109	81.0811	67.4157	-13.6654
64	59.9275	67.7422	7.8147	100	100	-1.19371e-12	64	60.5433	62.2157	1.67237	133.333	133.333	-2.10321e-12	64	60.3311	63.2624	2.93121	136.364	142.857	6.49351	64	56.0974	52.8452	-3.25223	80	103.448	23.4483
65	60.4055	65.7318	5.32637	100	100	1.19371e-12	65	61.1764	58.8081	-2.36831	127.66	127.66	0	65	59.8658	68.4499	8.58409	142.857	139.535	-3.32226	65	57.1321	55.1622	-1.9699	77.9221	78.9474	1.02529
66	59.9527	68.2825	8.32978	98.3607	96.7742	-1.58646	66	61.6118	67.1746	5.56277	139.535	133.333	-6.20155	66	60.1561	54.8814	-5.2747	142.857	146.341	3.48432	66	59.0429	56.2712	-2.77165	80	77.9221	-2.07792
67	60.4016	68.7562	8.35462	103.448	103.448	1.26477e-12	67	58.4978	63.3079	4.81011	127.66	127.66	1.91847e-12	67	60.1631	64.3151	4.15201	150	146.341	-3.65854	67	57.8158	54.5965	-3.21937	77.9221	81.0811	3.159
68	60.1047	69.9929	9.88814	93.75	95.2381	1.4881	68	59.0787	57.3817	-1.69705	127.66	127.66	1.91847e-12	68	59.8201	72.1406	12.3205	150	150	0	68	57.675	66.6581	8.98317	82.1918	65.2174	-16.9744
69	59.5716	78.2307	18.6591	100	100	0	69	59.2292	58.3147	-0.914437	120	122.449	2.44898	69	60.478	62.724	2.24602	153.846	150	-3.84615	69	58.2799	52.4984	-5.78152	78.9474	105.263	26.3158
70	60.6372	57.3477	-3.2895	100	100	0	70	58.4995	64.9342	6.43479	122.449	120	-2.44898	70	60.5319	56.1954	-4.33658	150	153.846	3.84615	70	59.4054	56.2301	-3.17522	76.9231	77.9221	0.999001
71	59.9848	75.3368	15.352	101.695	101.695	0	71	59.2979	65.3882	6.09029	120	120	0	71	60.1694	60.9171	0.747642	150	150	2.67164e-12	71	59.2897	58.9725	-0.317181	76.9231	75.9494	-0.97371
72	58.2791	64.9188	6.63969	98.3607	98.3607	0	72	59.6219	58.759	-0.862947	122.449	122.449	0	72	59.8321	72.703	12.8709	150	146.341	-3.65854	72	59.4139	64.5232	5.10933	78.9474	63.1579	-15.7895
73	58.4972	59.8064	1.30926	98.3607	98.3607	0	73	59.8921	65.0146	5.12252	117.647	117.647	0	73	60.9575	62.53	1.57251	146.341	150	3.65854	73	59.5796	54.7742	-4.80543	80	105.263	25.2632
74	58.865	68.0517	9.18667	101.695	101.695	0	74	60.0655	63.1905	3.12504	125	125	1.84741e-12	74	58.958	60.5467	1.58872	146.341	146.341	0	74	60.0831	69.4257	9.34263	83.3333	66.6667	-16.6667
75	59.536	59.7049	0.168894	92.3077	93.75	1.44231	75	59.8071	64.9293	5.12219	122.449	122.449	-1.77636e-12	75	60.6396	68.2645	7.62492	150	150	0	75	60.7941	62.9011	2.10696	80	78.9474	-1.05263
76	59.3981	70.9054	11.5073	98.3607	96.7742	-1.58646	76	60.3338	64.01	3.6762	125	127.66	2.65957	76	60.4798	62.7681	2.28825	142.857	142.857	0	76	60.8945	61.0047	0.110141	78.9474	103.448	24.5009
77	59.7454	63.1839	3.43845	100	100	2.37321e-12	77	58.6591	61.1963	2.53728	127.66	125	-2.65957	77	60.0517	67.8621	7.81046	146.341	146.341	0	77	54.3676	52.6255	-1.74214	78.9474	75	-3.94737
78	60.2654	62.1741	1.90867	95.2381	96.7742	1.5361	78	58.5989	58.6932	0.0942973	125	127.66	2.65957	78	60.2985	58.7873	-1.51117	142.857	146.341	3.48432	78	54.7566	65.0567	10.3001	78.9474	75	-3.94737
79	59.7162	77.1578	17.4416	103.448	100	-3.44828	79	57.0169	63.8245	6.80756	130.435	127.66	-2.77521	79	60.5525	71.4624	10.9099	146.341	142.857	-3.48432	79	54.9315	52.0651	-2.86633	83.3333	86.9565	3.62319
80	59.473	56.8349	-2.6381	100	101.695	1.69492	80	59.3727	62.3002	2.9275	125	127.66	2.65957	80	59.6233	62.8095	3.18618	146.341	146.341	0	80	55.1374	69.0583	13.9209	81.0811	83.3333	2.25225
81	59.5559	68.1282	8.57231	103.448	103.448	0	81	58.3068	60.5682	2.26135	127.66	127.66	0	81	59.5887	63.368	3.77932	146.341	146.341	0	81	56.0503	57.4868	1.43658	77.9221	80	2.07792
82	58.7459	68.4238	9.67787	96.7742	98.3607	1.58646	82	58.13	62.8434	4.7134	127.66	125	-2.65957	82	60.498	64.0151	3.51718	146.341	146.341	0	82	56.6712	65.8018	9.13065	78.9474	77.9221	-1.02529
83	58.6465	65.2282	6.58169	100	100	2.37321e-12	83	59.4505	61.1289	1.67843	125	127.66	2.65957	83	59.5871	64.3111	4.72398	146.341	146.341	0	83	51.277	58.4685	7.19154	78.9474	82.1918	3.24441
84	59.8445	66.1798	6.33538	101.695	100	-1.69492	84	59.6153	65.2415	5.62627	125	122.449	-2.55102	84	59.8604	59.7389	-0.12158	150	150	0	84	54.7155	57.7965	3.08103	83.3333	75.9494	-7.38397
85	57.9589	70.6332	12.6743	107.143	107.143	-2.71427e-12	85	59.774	66.2754	6.50141	120	122.449	2.44898	85	60.0202	69.7068	9.68663	150	150	0	85	55.6911	54.7162	-0.974978	83.3333	75.9494	-7.38397
86	58.2027	53.7754	-4.42728	100	103.448	3.44828	86	59.9942	60.3486	0.354326	127.66	127.66	0	86	59.9237	60.2659	0.342223	150	150	0	86	55.2322	66.8448	11.6126	80	88.2353	8.23529
87	58.4281	63.9948	5.56671	93.75	92.3077	-1.44231	87	60.4018	60.6868	0.284937	125	122.449	-2.55102	87	60.6628	62.7694	2.10661	150	150	0	87	55.1823	67.3285	12.1461	84.507	61.8557	-22.6514
88	57.5412	68.9268	11.3856	98.3607	98.3607	0	88	60.1513	66.4026	6.25131	125	125	3.70903e-12	88	60.8605	58.2272	-2.63336	146.341	146.341	0	88	54.9319	59.9069	4.97499	82.1918	125	42.8082
89	58.1912	59.8865	1.69533	96.7742	96.7742	0	89	60.3859	65.9489	5.56306	125	125	-3.70903e-12	89	59.8225	59.3755	-0.447013	146.341	146.341	0	89	56.7543	49.1449	-7.6094	82.1918	72.2892	-9.90262
90	58.3734	64.8967	6.52324	103.448	103.448	0	90	60.525	62.1359	1.61089	122.449	125	2.55102	90	60.0073	63.358	3.35071	146.341	146.341	0	90	57.0456	59.3493	2.30367	74.0741	89.5522	15.4782
91	57.6618	67.7387	10.0769	100	101.695	1.69492	91	59.7592	62.6682	2.90909	125	125	0	91	60.1312	66.2467	6.11551	146.341	146.341	0	91	56.7645	56.0203	-0.744226	80	73.1707	-6.82927
92	58.4148	57.7205	-0.694332	103.448	101.695	-1.75336	92	60.4787	66.5712	6.09246	122.449	120	-2.44898	92	59.859	70.7331	10.8741	150	150	2.67164e-12	92	57.4221	55.5388	-1.88324	75.9494	80	4.05063
93	58.3276	66.5312	8.20359	100	100	2.37321e-12	93	60.5078	66.5088	6.00103	125	125	-3.70903e-12	93	59.6336	59.9864	0.352822	146.341	146.341	0	93	54.6666	55.2586	0.591982	78.9474	77.9221	-1.02529
94	58.9926	66.0276	7.03492	98.3607	98.3607	0	94	61.0828	66.1067	5.0239	120	120	0	94	59.9908	61.6708	1.68004	150	150	0	94	56.8522	53.3315	-3.52068	82.1918	78.9474	-3.24441
95	58.8151	61.8742	3.05913	98.3607	100	1.63934	95	60.6287	75.759	15.1303	127.66	130.435	2.77521	95	59.721	60.1461	0.425098	153.846	153.846	0	95	56.5574	51.1492	-5.40819	75.9494	83.3333	7.38397
96	58.8839	66.6021	7.71824	100	100	0	96	60.1417	64.7447	4.60304	127.66	130.435	2.77521	96	60.074	69.9761	9.90208	142.857	142.857	-4.86011e-12	96	55.4856	55.2867	-0.198891	80	75	-5
97	59.934	65.0082	5.07414	96.7742	95.2381	-1.5361	97	59.4958	53.2905	-6.20537	130.435	133.333	2.89855	97	60.5391	66.2592	5.72017	150	150	0	97	57.0007	50.6294	-6.37136	78.9474	81.0811	2.13371
98	56.5742	61.3689	4.79463	93.75	95.2381	1.4881	98	59.88	67.0014	7.12144	125	122.449	-2.55102	98	60.2477	57.6185	-2.62922	142.857	142.857	4.86011e-12	98	55.241	64.92	9.679	77.9221	77.9221	0
99	58.2561	50.8492	-7.40693	98.3607	98.3607	0	99	59.2627	67.1204	7.85773	127.66	127.66	0	99	60.4682	65.782	5.31379	150	150	0	99	55.8036	76.4048	20.6012
100	55.3574	67.7072	12.3499	98.3607	98.3607	0	100	58.23	61.634	3.40395	125	127.66	2.65957	100	59.8764	64.7374	4.86104	146.341	146.341	0	100	58.0405	55.5518	-2.48871
101	56.2666	60.5815	4.3149	100	100	0	101	58.9345	55.4116	-3.52298	125	125	0	101	60.3425	62.0476	1.7051	146.341	146.341	0	101	58.3751	52.6657	-5.70937	82.1918	88.2353	6.04351
102	55.9744	63.1792	7.20471	98.3607	100	1.63934	102	59.6171	63.5782	3.96106	125	122.449	-2.55102	102	60.3462	66.2334	5.88719	146.341	146.341	-5.08749e-12	102	59.6961	70.6469	10.9508	82.1918	88.2353	6.04351
103	54.5088	54.9444	0.435647	98.3607	98.3607	0	103	60.1507	68.9796	8.82885	125	125	-3.70903e-12	103	60.1276	66.867	6.73943	150	150	5.34328e-12	103	59.7439	55.9508	-3.79305	83.3333	78.9474	-4.38596
104	52.382	64.8067	12.4247	96.7742	96.7742	-2.21689e-12	104	59.0864	61.7064	2.62002	122.449	125	2.55102	104	60.6284	61.4934	0.865026	153.846	150	-3.84615	104	59.4116	66.8603	7.4487	81.0811	85.7143	4.6332
105	54.1208	57.3168	3.19597	96.7742	95.2381	-1.5361	105	59.7707	61.2089	1.43821	130.435	130.435	0	105	60.6505	65.499	4.84848	153.846	153.846	0	105	59.1277	55.3867	-3.74094	80	84.507	4.50704
106	55.179	55.0512	-0.12788	98.3607	100	1.63934	106	59.1811	62.7462	3.5651	127.66	127.66	0	106	60.6855	62.9382	2.25274	153.846	153.846	0	106	60.754	70.3226	9.56866	78.9474	76.9231	-2.02429
107	53.7509	64.1224	10.3716	101.695	101.695	2.44427e-12	107	58.3173	61.6536	3.33634	125	125	0	107	60.2206	64.3889	4.16829	150	153.846	3.84615	107	57.3296	56.0715	-1.25808	81.0811	74.0741	-7.00701
108	52.5092	54.9118	2.40259	103.448	103.448	-2.52953e-12	108	60.498	66.6294	6.1314	125	122.449	-2.55102	108	60.6992	65.204	4.50478	146.341	146.341	5.08749e-12	108	59.3601	59.6902	0.33011	81.0811	74.0741	-7.00701
109	55.5192	57.1033	1.5841	98.3607	100	1.63934	109	59.2569	64.4138	5.15691	125	127.66	2.65957	109	60.3099	63.0416	2.73174	146.341	146.341	0	109	60.0543	59.7515	-0.302735	81.0811	80	-1.08108
110	54.1674	61.4859	7.31852	105.263	103.448	-1.81488	110	59.6221	60.5018	0.879784	127.66	127.66	0	110	61.0569	68.5096	7.45272	150	150	-5.34328e-12	110	59.9653	56.6582	-3.30712	77.9221	81.0811	3.159
111	54.8075	57.0608	2.25333	105.263	105.263	-2.62901e-12	111	59.3883	64.7757	5.38741	122.449	122.449	3.55271e-12	111	60.9747	63.4155	2.44083	142.857	146.341	3.48432	111	59.5116	57.9193	-1.59231	75.9494	76.9231	0.97371
112	53.9303	56.9327	3.00247	98.3607	100	1.63934	112	59.8634	64.6415	4.77816	120	122.449	2.44898	112	60.6078	70.8581	10.2503	146.341	139.535	-6.80658	112	59.4897	56.8526	-2.63709	78.9474	75	-3.94737
113	55.672	62.2806	6.60864	98.3607	96.7742	-1.58646	113	60.1016	62.5686	2.46697	125	122.449	-2.55102	113	61.2138	62.9637	1.7499	146.341	150	3.65854	113	61.192	58.6168	-2.57516	77.9221	80	2.07792
114	56.58	60.9081	4.32809	100	100	2.37321e-12	114	59.2175	62.8218	3.60426	122.449	125	2.55102	114	60.9995	69.9621	8.9626	146.341	146.341	-5.08749e-12	114	58.8089	72.0469	13.238	75.9494	81.0811	5.13171
115	57.3998	60.1933	2.79343	96.7742	96.7742	-2.21689e-12	115	57.3904	62.6533	5.26284	122.449	122.449	-3.55271e-12	115	61.7242	66.2443	4.52001	150	146.341	-3.65854	115	59.7224	73.581	13.8586	82.1918	60.6061	-21.5857
116	57.5121	61.0746	3.56247	101.695	101.695	0	116	58.1954	63.2627	5.06722	125	125	0	116	60.1652	67.968	7.80283	146.341	146.341	-5.08749e-12	116	57.7423	55.4804	-2.26191	77.9221	115.385	37.4625
117	57.2754	63.729	6.45354	100	98.3607	-1.63934	117	59.165	63.0365	3.87151	120	117.647	-2.35294	117	60.9134	57.0535	-3.85993	146.341	146.341	-5.08749e-12	117	59.7144	56.9444	-2.77003	78.9474	81.0811	2.13371
118	58.4754	63.198	4.72256	103.448	105.263	1.81488	118	60.0131	67.5115	7.49845	122.449	120	-2.44898	118	60.4998	64.3905	3.89063	146.341	146.341	0	118	57.8038	56.9887	-0.815045	78.9474	81.0811	2.13371
119	54.3771	62.708	8.33088	98.3607	98.3607	0	119	59.6233	58.677	-0.946388	122.449	125	2.55102	119	60.5636	70.0476	9.48396	146.341	146.341	5.08749e-12	119	59.1427	54.8764	-4.26628	81.0811	76.9231	-4.158
120	58.2994	64.1058	5.80635	101.695	101.695	-2.44427e-12	120	60.0172	60.6766	0.659338	122.449	122.449	0	120	60.5163	64.4506	3.93429	150	150	-5.34328e-12	120	61.2054	67.8301	6.62471	82.1918	65.2174	-16.9744
121	56.8484	62.9352	6.08687	100	100	2.37321e-12	121	60.3715	69.4469	9.07541	122.449	122.449	-3.55271e-12	121	59.8614	62.1212	2.25979	150	150	5.34328e-12	121	58.3086	54.2912	-4.01745	81.0811	66.6667	-14.4144
122	54.3566	61.5733	7.21667	101.695	101.695	-2.44427e-12	122	60.2732	64.7521	4.47896	130.435	130.435	4.03588e-12	122	60.6595	62.7566	2.09715	146.341	146.341	0	122	59.4754	73.6142	14.1388	81.0811	66.6667	-14.4144
123	56.6264	59.302	2.67561	100	100	2.37321e-12	123	60.5938	60.7954	0.201656	125	122.449	-2.55102	123	60.6918	66.3647	5.67284	146.341	146.341	-5.08749e-12	123	59.3758	53.7942	-5.5816	77.9221	107.143	29.2208
124	58.5782	66.1146	7.5364	98.3607	98.3607	0	124	60.6922	58.4326	-2.25968	122.449	127.66	5.21059	124	60.0798	63.854	3.7743	146.341	146.341	0	124	56.9584	57.7841	0.825699	80	78.9474	-1.05263
125	59.486	62.9079	3.42192	96.7742	95.2381	-1.5361	125	60.2924	53.5399	-6.75248	122.449	127.66	5.21059	125	60.6343	64.2385	3.60419	146.341	146.341	5.08749e-12	125	59.9745	56.1187	-3.85583	80	76.9231	-3.07692
126	60.5173	71.0481	10.5308	95.2381	95.2381	0	126	60.3605	68.4818	8.12138	127.66	125	-2.65957	126	60.6033	67.3369	6.73367	146.341	146.341	0	126	58.0136	59.3736	1.36005	80	76.9231	-3.07692
127	58.8673	79.6858	20.8185	101.695	103.448	1.75336	127	60.1657	73.8584	13.6927	122.449	122.449	0	127	60.3275	65.0352	4.70778	146.341	146.341	-5.08749e-12	127	59.1877	67.4745	8.28681	83.3333	65.2174	-18.1159
128	52.6139	55.9384	3.3245	101.695	103.448	1.75336	128	60.7842	60.5025	-0.281712	122.449	125	2.55102	128	60.4571	64.3539	3.89682	142.857	142.857	0	128	58.7818	54.7699	-4.01192	78.9474	111.111	32.1637
129	53.169	62.4653	9.29625	105.263	103.448	-1.81488	129	60.0717	62.0521	1.9804	122.449	120	-2.44898	129	60.7386	64.459	3.72037	150	150	5.34328e-12	129	57.6359	56.1123	-1.5237	77.9221	75	-2.92208
130	55.5292	55.158	-0.371139	101.695	103.448	1.75336	130	59.743	62.4742	2.73125	117.647	117.647	0	130	60.7155	67.051	6.33551	146.341	146.341	0	130	60.4322	58.8935	-1.53874	77.9221	75	-2.92208
131	54.9214	63.8808	8.95935	98.3607	96.7742	-1.58646	131	60.9646	64.3113	3.34673	122.449	122.449	0	131	60.5767	63.9534	3.37676	150	150	0	131	60.5549	58.3151	-2.23982	77.9221	75	-2.92208
132	55.8452	62.6353	6.79012	103.448	105.263	1.81488	132	61.0351	64.8424	3.80725	130.435	130.435	4.03588e-12	132	61.0658	64.019	2.95317	142.857	142.857	-4.86011e-12	132	55.5129	60.7224	5.20942	78.9474	78.9474	2.95586e-12
133	56.298	57.448	1.14996	100	100	2.37321e-12	133	60.8721	65.8882	5.0161	125	125	-3.70903e-12	133	60.1133	66.4778	6.36447	146.341	146.341	5.08749e-12	133	59.3495	51.9564	-7.39307	81.0811	77.9221	-3.159
134	56.5236	63.2784	6.75483	96.7742	98.3607	1.58646	134	60.7621	64.227	3.46491	127.66	127.66	0	134	60.675	64.1022	3.42725	150	150	-5.34328e-12	134	58.4066	66.9717	8.56511	78.9474	85.7143	6.76692
135	58.3129	61.1782	2.86534	96.7742	95.2381	-1.5361	135	60.7106	65.4206	4.71003	125	125	0	135	60.3406	67.3794	7.03882	142.857	142.857	0	135	60.3981	74.745	14.3468	77.9221	120	42.0779
136	58.5704	65.161	6.59067	101.695	101.695	0	136	60.3165	68.9906	8.67413	127.66	127.66	0	136	60.1973	58.0643	-2.13297	150	150	5.34328e-12	136	59.755	50.4078	-9.34711	77.9221	120	42.0779
137	56.5114	62.242	5.73058	98.3607	101.695	3.33426	137	60.8954	62.5946	1.69926	125	125	0	137	60.0497	66.98	6.93028	142.857	142.857	0	137	60.8681	60.7935	-0.0745717	78.9474	80	1.05263
138	56.3202	62.3049	5.98471	101.695	98.3607	-3.33426	138	60.9826	68.1926	7.21	127.66	125	-2.65957	138	60.4375	66.8648	6.42735	146.341	146.341	0	138	60.5178	66.339	5.82121	78.9474	80	1.05263
139	53.769	58.786	5.01697	100	103.448	3.44828	139	61.1319	68.2864	7.15453	125	130.435	5.43478	139	60.5662	63.5496	2.98339	146.341	150	3.65854	139	60.2392	61.4493	1.21014	81.0811	81.0811	-3.11218e-12
140	55.1168	58.5633	3.4465	98.3607	96.7742	-1.58646	140	60.8784	68.1586	7.28022	125	122.449	-2.55102	140	60.7947	65.453	4.6583	146.341	142.857	-3.48432	140	59.8834	60.76	0.876642	77.9221	85.7143	7.79221
141	58.3954	64.7269	6.33145	100	98.3607	-1.63934	141	61.1571	65.1392	3.98215	122.449	125	2.55102	141	60.3487	65.4024	5.05373	142.857	146.341	3.48432	141	60.762	54.0523	-6.70969	77.9221	84.507	6.58496
142	57.3021	60.7338	3.4317	101.695	103.448	1.75336	142	60.9124	65.8493	4.93697	130.435	127.66	-2.77521	142	60.9032	64.3837	3.48049	146.341	142.857	-3.48432	142	60.5864	74.3385	13.7521	77.9221	84.507	6.58496
143	57.1151	61.4117	4.29658	98.3607	98.3607	0	143	61.0973	68.8028	7.70548	133.333	133.333	0	143	60.8757	64.2923	3.41655	150	150	5.34328e-12	143	59.7345	65.0647	5.33023
144	56.0494	60.8731	4.82373	98.3607	100	1.63934	144	60.5806	66.3973	5.8167	133.333	133.333	0	144	60.296	56.7115	-3.58452	150	150	5.34328e-12	144	60.8175	62.9415	2.12404	75.9494	88.2353	12.2859
145	59.3178	64.2929	4.97504	98.3607	95.2381	-3.12256	145	60.0149	66.3868	6.37181	130.435	130.435	0	145	60.3304	53.0137	-7.31673	150	150	5.34328e-12	145	58.9384	67.036	8.09761	75.9494	88.2353	12.2859
146	57.8348	66.1808	8.34607	98.3607	100	1.63934	146	60.6315	66.2157	5.58417	127.66	127.66	0	146	59.9129	73.5233	13.6104	142.857	142.857	0	146	60.139	64.7655	4.62654
147	55.9186	60.151	4.23245	98.3607	98.3607	2.30216e-12	147	60.2435	66.6786	6.43506	127.66	127.66	0	147	60.2343	66.2832	6.04891	153.846	150	-3.84615	147	60.1622	62.1428	1.98069	81.0811	70.5882	-10.4928
148	57.4191	65.0903	7.67127	100	100	-2.359e-12	148	60.6363	68.127	7.4907	127.66	127.66	0	148	60.7703	64.7674	3.99704	146.341	150	3.65854	148	62.0502	69.1441	7.09387	81.0811	70.5882	-10.4928
149	59.8033	57.874	-1.92932	100	100	4.74643e-12	149	61.1628	66.0254	4.86261	127.66	127.66	3.85114e-12	149	60.0946	58.706	-1.3886	150	150	-5.34328e-12	149	59.3948	69.7168	10.322	76.9231	88.2353	11.3122
150	59.7454	68.4491	8.70373	100	98.3607	-1.63934	150	61.3804	69.0341	7.65364	127.66	127.66	0	150	60.7353	62.6684	1.93313	146.341	146.341	5.08749e-12	150	60.5987	82.6311	22.0325	82.1918	60.6061	-21.5857
151	59.505	70.9706	11.4656	103.448	103.448	0	151	61.0207	67.8483	6.8276	127.66	125	-2.65957	151	59.9052	67.4062	7.50099	146.341	146.341	0	151	60.8074	61.3145	0.507054	77.9221	111.111	33.189
152	58.5055	60.483	1.97756	100	101.695	1.69492	152	60.4618	57.269	-3.1928	133.333	133.333	-4.20641e-12	152	60.8194	64.8432	4.02378	146.341	150	3.65854	152	61.1832	62.3119	1.12861	75.9494	71.4286	-4.5208
153	59.3963	65.6211	6.22483	100	98.3607	-1.63934	153	60.6916	57.1484	-3.54328	133.333	133.333	-4.20641e-12	153	60.5704	61.4741	0.903714	150	146.341	-3.65854	153	59.4752	65.6128	6.13754	83.3333	85.7143	2.38095
154	58.6397	69.1117	10.472	98.3607	101.695	3.33426	154	60.5278	67.0185	6.49074	125	125	0	154	60.6115	69.5318	8.92032	150	150	-5.34328e-12	154	59.8639	75.1815	15.3176	83.3333	85.7143	2.38095
155	59.8043	60.0896	0.285353	105.263	101.695	-3.56824	155	60.6899	70.6799	9.99007	130.435	127.66	-2.77521	155	60.5613	63.5811	3.01972	146.341	146.341	5.08749e-12	155	57.0826	61.9912	4.90861	82.1918	74.0741	-8.11771
156	58.0843	44.943	-13.1413	98.3607	75.9494	-22.4113	156	60.8613	65.8839	5.02266	130.435	133.333	2.89855	156	60.2559	63.8807	3.62476	146.341	146.341	0	156	59.0548	53.8361	-5.21867	82.1918	74.0741	-8.11771
157	56.4953	73.1945	16.6992	98.3607	75.9494	-22.4113	157	60.8785	62.5982	1.7197	127.66	127.66	0	157	60.5157	68.1246	7.60892	150	146.341	-3.65854	157	60.6346	61.5887	0.954122	77.9221	93.75	15.8279
158	59.4807	71.7939	12.3132	107.143	107.143	0	158	60.9513	64.3001	3.34876	125	125	0	158	60.8181	65.8011	4.983	142.857	146.341	3.48432	158	60.9673	69.6177	8.65042	81.0811	72.2892	-8.79192
159	59.8961	68.288	8.39189	103.448	105.263	1.81488	159	60.0176	71.3018	11.2841	127.66	127.66	0	159	60.5937	63.6534	3.05965	142.857	146.341	3.48432	159	60.5983	72.2928	11.6945	81.0811	64.5161	-16.565
160	55.1316	43.6423	-11.4893	100	139.535	39.5349	160	59.7883	61.596	1.80768	127.66	127.66	0	160	60.3216	61.6302	1.30857	146.341	142.857	-3.48432	160	58.7888	60.3329	1.54406	81.0811	111.111	30.03
161	54.2956	68.881	14.5854	101.695	78.9474	-22.7475	161	59.2156	64.7706	5.55501	127.66	127.66	0	161	60.8307	69.4665	8.63581	146.341	142.857	-3.48432	161	58.8808	59.4478	0.566932	78.9474	84.507	5.55967
162	53.9183	60.8976	6.97929	96.7742	96.7742	4.43379e-12	162	59.725	68.69	8.965	127.66	127.66	0	162	60.8663	67.1784	6.31208	139.535	142.857	3.32226	162	59.3675	66.4448	7.07728	76.9231	81.0811	4.158
163	60.1426	67.6142	7.47166	107.143	107.143	0	163	59.8651	59.3376	-0.527473	125	127.66	2.65957	163	60.3936	64.1135	3.71995	142.857	142.857	0	163	60.7204	80.1036	19.3832	76.9231	81.0811	4.158
164	59.4126	62.9591	3.5465	111.111	111.111	-5.85487e-12	164	60.1007	64.8181	4.71736	125	122.449	-2.55102	164	60.2787	60.7316	0.452935	142.857	142.857	4.86011e-12	164	57.8063	54.1265	-3.67981	78.9474	74.0741	-4.87329
165	58.3669	60.7765	2.40961	107.143	105.263	-1.8797	165	60.181	65.3034	5.12239	125	125	-3.70903e-12	165	60.5493	69.7947	9.24534	142.857	142.857	0	165	60.4065	55.2061	-5.20036	78.9474	74.0741	-4.87329
166	54.426	64.6159	10.1898	92.3077	93.75	1.44231	166	60.8656	62.4552	1.58959	122.449	125	2.55102	166	60.4349	67.2635	6.82864	142.857	142.857	0	166	58.6233	62.7921	4.16881	76.9231	85.7143	8.79121
167	59.2358	65.9628	6.72697	96.7742	96.7742	0	167	60.9195	69.2561	8.33663	125	122.449	-2.55102	167	60.1845	61.5386	1.35405	142.857	142.857	0	167	60.0584	66.4488	6.39043	77.9221	85.7143	7.79221
168	56.3597	44.9861	-11.3736	95.2381	136.364	41.1255	168	60.6041	67.4919	6.88776	122.449	122.449	0	168	61.2072	65.4121	4.20487	142.857	142.857	-4.86011e-12	168	60.0601	61.6108	1.55066	77.9221	85.7143	7.79221
169	56.2336	69.861	13.6273	96.7742	74.0741	-22.7001	169	60.1574	65.1639	5.00648	117.647	120	2.35294	169	61.0246	70.8439	9.81929	142.857	142.857	0	169	59.3932	61.3549	1.96169	80	81.0811	1.08108
170	55.9937	48.4723	-7.5214	95.2381	136.364	41.1255	170	60.1117	64.9656	4.85396	125	125	3.70903e-12	170	60.4591	64.5705	4.11143	142.857	142.857	0	170	59.7311	63.7537	4.0226	80	81.0811	1.08108
171	55.0781	68.7276	13.6495	101.695	76.9231	-24.7718	171	60.4263	64.9528	4.52652	125	125	0	171	61.6745	67.4384	5.76397	142.857	142.857	0	171	61.0429	55.4252	-5.61773	77.9221	76.9231	-0.999001
172	56.3928	58.7966	2.40377	101.695	101.695	-4.88853e-12	172	60.5725	67.9298	7.35727	127.66	125	-2.65957	172	60.442	81.8764	21.4344	142.857	150	7.14286	172	60.8466	58.9839	-1.86275	90.9091	89.5522	-1.35685
173	54.2354	73.6664	19.431	98.3607	98.3607	0	173	60.915	65.3551	4.44016	125	127.66	2.65957	173	59.9082	61.0979	1.1897	142.857	150	7.14286	173	60.6392	69.689	9.04975	90.9091	89.5522	-1.35685
174	52.9526	62.8223	9.86965	101.695	101.695	0	174	61.1011	65.0164	3.9153	120	120	0	174	60.6626	58.0288	-2.6338	146.341	142.857	-3.48432	174	57.6702	62.3323	4.66218	84.507	85.7143	1.20724
175	53.6611	55.6223	1.96123	103.448	103.448	0	175	60.3372	66.6264	6.28924	127.66	125	-2.65957	175	60.2309	70.7853	10.5544	139.535	139.535	-4.63274e-12	175	60.0977	61.4658	1.36805	82.1918	82.1918	0
176	59.2741	69.857	10.5829	103.448	105.263	1.81488	176	60.7281	64.8636	4.13545	125	125	-3.70903e-12	176	60.2605	67.1438	6.8833	139.535	142.857	3.32226	176	59.3882	62.8325	3.44424	83.3333	84.507	1.17371
177	53.0316	63.125	10.0934	105.263	103.448	-1.81488	177	60.5112	67.5183	7.00712	127.66	127.66	0	177	60.3881	66.2457	5.85756	142.857	139.535	-3.32226	177	57.9183	62.4624	4.54409	81.0811	81.0811	-6.22435e-12
178	53.4672	59.6626	6.19535	96.7742	96.7742	0	178	61.0689	64.7394	3.67051	122.449	122.449	0	178	60.0464	63.9729	3.9265	136.364	139.535	3.17125	178	57.3315	61.2044	3.87282	84.507	84.507	0
179	58.8734	64.1515	5.27809	107.143	109.091	1.94805	179	61.4393	67.0271	5.58777	125	125	3.70903e-12	179	60.6591	61.4579	0.798863	146.341	142.857	-3.48432	179	59.2957	63.639	4.34333	82.1918	82.1918	0
180	59.4434	63.2355	3.79205	107.143	105.263	-1.8797	180	60.2739	62.0768	1.80292	127.66	125	-2.65957	180	60.8469	67.8977	7.05079	139.535	142.857	3.32226	180	59.4961	62.5538	3.05779	82.1918	82.1918	0
181	53.6846	67.6818	13.9973	93.75	93.75	0	181	60.1709	58.5167	-1.65423	127.66	125	-2.65957	181	60.1193	68.1541	8.03487	146.341	142.857	-3.48432	181	59.7275	66.0238	6.29631	82.1918	83.3333	1.14155
182	55.0115	60.794	5.78247	98.3607	98.3607	0	182	60.9559	73.8514	12.8955	120	120	0	182	60.0156	58.7687	-1.24691	139.535	142.857	3.32226	182	60.6387	65.9513	5.31254	81.0811	80	-1.08108
183	59.0834	72.6491	13.5657	109.091	109.091	0	183	60.929	70.0615	9.13252	125	125	0	183	60.3214	63.7943	3.47292	146.341	142.857	-3.48432	183	59.3597	66.4441	7.08436	78.9474	81.0811	2.13371
184	54.5546	57.1696	2.61507	103.448	103.448	0	184	60.1793	59.7175	-0.461827	125	127.66	2.65957	184	60.8813	70.7438	9.86248	139.535	139.535	-4.63274e-12	184	60.0366	56.6511	-3.38551	78.9474	101.695	22.7475
185	57.7969	66.7299	8.93296	103.448	103.448	0	185	60.8482	62.1389	1.29078	127.66	125	-2.65957	185	61.0141	66.5413	5.52723	142.857	142.857	0	185	58.2594	65.4796	7.22013	80	63.8298	-16.1702
186	57.8065	68.165	10.3585	103.448	103.448	0	186	60.266	71.9966	11.7307	122.449	122.449	7.10543e-12	186	60.7539	63.3772	2.62327	139.535	142.857	3.32226	186	58.193	62.7037	4.51072	78.9474	80	1.05263
187	59.2998	58.8754	-0.424369	107.143	107.143	0	187	60.6179	65.2871	4.66922	125	125	-7.40386e-12	187	60.6045	62.9947	2.39013	142.857	142.857	-4.86011e-12	187	58.8005	65.4569	6.65639	81.0811	80	-1.08108
188	56.4005	61.7867	5.38627	100	100	0	188	61.1067	62.1135	1.00683	117.647	120	2.35294	188	61.0628	66.5203	5.4575	146.341	142.857	-3.48432	188	59.7994	58.1634	-1.63595	81.0811	63.8298	-17.2513
189	59.3154	67.3301	8.01468	100	100	0	189	60.6934	73.3432	12.6497	125	122.449	-2.55102	189	61.3893	65.6783	4.28903	146.341	146.341	0	189	57.9081	64.8974	6.98935	81.0811	63.8298	-17.2513
190	54.532	62.836	8.30396	101.695	101.695	0	190	60.8919	67.342	6.45016	122.449	122.449	0	190	60.7559	60.8792	0.123313	142.857	146.341	3.48432	190	60.8257	55.2522	-5.57346	77.9221	105.263	27.3411
191	55.1605	63.2041	8.04358	101.695	101.695	0	191	60.7817	62.6554	1.87372	125	127.66	2.65957	191	60.9013	63.2401	2.33884	142.857	142.857	0	191	59.1756	71.1132	11.9376	80	63.8298	-16.1702
192	59.3728	68.4694	9.09661	100	100	0	192	60.2692	68.45	8.18084	122.449	120	-2.44898	192	60.9766	66.9136	5.93702	146.341	142.857	-3.48432	192	58.6017	61.7921	3.19033	80	80	0
193	58.5311	65.2293	6.69824	100	100	0	193	60.1045	70.1558	10.0513	125	125	0	193	60.7339	68.1691	7.43517	146.341	146.341	-5.08749e-12	193	59.4269	58.5582	-0.868641	75.9494	100	24.0506
194	53.2041	46.2227	-6.98135	96.7742	127.66	30.8854	194	60.0453	63.9938	3.94847	117.647	120	2.35294	194	60.5871	63.0882	2.50108	146.341	146.341	0	194	59.5539	65.4016	5.84771	78.9474	63.8298	-15.1176
195	53.4577	68.7288	15.2711	103.448	82.1918	-21.2565	195	60.9433	68.414	7.47072	125	122.449	-2.55102	195	61.1635	65.6437	4.4802	139.535	142.857	3.32226	195	60.1538	56.9954	-3.15833	77.9221	103.448	25.5262
196	53.9347	41.5128	-12.4218	95.2381	130.435	35.1967	196	60.5752	67.1058	6.53066	117.647	120	2.35294	196	60.6694	66.6323	5.96283	146.341	146.341	0	196	55.4787	59.2992	3.82054	89.5522	89.5522	0
197	58.3875	77.2418	18.8543	96.7742	75.9494	-20.8248	197	61.4681	69.9036	8.43548	117.647	115.385	-2.26244	197	61.0064	64.1177	3.11129	146.341	146.341	0	197	56.0815	65.4112	9.32972	89.5522	89.5522	0
198	57.9655	54.9759	-2.98955	96.7742	96.7742	4.43379e-12	198	60.9077	70.0204	9.11265	125	125	7.40386e-12	198	60.9952	66.9631	5.96788	146.341	142.857	-3.48432	198	57.8992	58.2529	0.353671	83.3333	84.507	1.17371
199	53.2409	67.8657	14.6249	95.2381	95.2381	-4.29168e-12	199	60.61	61.9066	1.29654	127.66	127.66	0	199	61.4916	64.5378	3.04614	142.857	146.341	3.48432	199	58.2874	64.0605	5.77303	81.0811	82.1918	1.1107
200	57.0688	58.2676	1.19879	101.695	101.695	4.88853e-12	200	60.4656	66.6122	6.14661	122.449	125	2.55102	200	61.3554	65.9676	4.61221	157.895	153.846	-4.04858	200	59.3456	55.0559	-4.28966	81.0811	103.448	22.3672
201	57.6683	64.0137	6.34537	100	100	-4.74643e-12	201	60.9765	71.1709	10.1944	117.647	115.385	-2.26244	201	58.8317	58.24	-0.591724	139.535	139.535	-9.23706e-12	201	59.5208	62.8226	3.30178	81.0811	65.9341	-15.147
202	60.0421	67.8298	7.78775	95.2381	96.7742	1.5361	202	60.9186	69.0209	8.10232	125	125	-7.40386e-12	202	58.3624	56.2106	-2.15188	139.535	139.535	-9.23706e-12	202	57.6883	65.3846	7.69629	77.9221	80	2.07792
203	59.587	62.1797	2.59274	100	100	-4.74643e-12	203	60.4633	64.9707	4.50746	120	120	0	203	57.2005	64.068	6.86752	146.341	142.857	-3.48432	203	58.6508	59.2689	0.618086	81.0811	80	-1.08108
204	59.0823	62.9406	3.85837	95.2381	95.2381	0	204	60.4273	67.4177	6.99048	120	122.449	2.44898	204	59.4599	67.9985	8.5386	146.341	150	3.65854	204	58.5579	57.9211	-0.636746	76.9231	96.7742	19.8511
205	59.8732	66.0825	6.20927	100	100	4.74643e-12	205	60.7831	68.1053	7.32221	122.449	120	-2.44898	205	59.6457	60.0239	0.378203	142.857	142.857	-9.6918e-12	205	58.5276	61.8518	3.32419	80	65.2174	-14.7826
206	57.7966	60.8947	3.09811	95.2381	96.7742	1.5361	206	60.3004	67.8293	7.52883	125	127.66	2.65957	206	60.4191	62.3736	1.95457	150	150	0	206	60.205	56.9624	-3.24254	81.0811	105.263	24.1821
207	59.9027	62.3714	2.46873	93.75	92.3077	-1.44231	207	61.3694	66.93	5.56059	130.435	125	-5.43478	207	59.9786	63.5084	3.5298	146.341	146.341	0	207	59.6875	65.1997	5.51222	83.3333	67.4157	-15.9176
208	60.5184	70.7384	10.22	101.695	101.695	0	208	59.1358	54.2185	-4.91726	117.647	115.385	-2.26244	208	61.4386	62.8994	1.46085	146.341	142.857	-3.48432	208	60.0705	63.7774	3.7069	81.0811	81.0811	0
209	58.957	61.518	2.56106	98.3607	98.3607	4.59011e-12	209	58.7222	70.144	11.4219	117.647	115.385	-2.26244	209	62.0284	66.7331	4.70467	146.341	146.341	0	209	56.1288	68.3054	12.1766	82.1918	83.3333	1.14155
210	60.4297	69.6661	9.23639	100	100	0	210	59.356	66.8322	7.47623	117.647	120	2.35294	210	61.5958	61.5951	-0.000686178	146.341	150	3.65854	210	57.6118	60.6779	3.06603	90.9091	88.2353	-2.6738
211	60.2799	64.1726	3.89274	103.448	101.695	-1.75336	211	58.6245	59.3225	0.698043	115.385	117.647	2.26244	211	60.6146	56.8132	-3.80139	142.857	142.857	9.6918e-12	211	58.6164	64.4674	5.851	84.507	85.7143	1.20724
212	60.0489	71.4413	11.3924	105.263	107.143	1.8797	212	58.9099	61.5608	2.65095	125	122.449	-2.55102	212	61.1012	67.4584	6.35718	146.341	142.857	-3.48432	212	58.7923	61.9059	3.11356	80	81.0811	1.08108
213	56.4045	56.9157	0.511177	105.263	107.143	1.8797	213	57.2499	64.219	6.96914	122.449	122.449	7.10543e-12	213	60.6932	64.9649	4.27172	139.535	142.857	3.32226	213	59.7916	67.719	7.92742	82.1918	81.0811	-1.1107
214	56.0786	62.1559	6.07738	103.448	101.695	-1.75336	214	58.2471	62.0673	3.82018	120	122.449	2.44898	214	61.1048	60.9934	-0.111455	146.341	142.857	-3.48432	214	59.8595	55.0704	-4.78904	78.9474	109.091	30.1435
215	55.3078	65.7076	10.3998	98.3607	100	1.63934	215	57.8165	59.5823	1.7658	127.66	125	-2.65957	215	58.0359	60.7013	2.66541	139.535	142.857	3.32226	215	58.5056	61.1444	2.63878	78.9474	76.9231	-2.02429
216	58.3026	60.5684	2.26584	101.695	101.695	0	216	59.3468	60.8342	1.48745	127.66	127.66	0	216	60.0813	60.8107	0.729449	146.341	146.341	1.01466e-11	216	59.7129	53.3973	-6.31566	78.9474	80	1.05263
217	58.0418	69.7159	11.6741	98.3607	98.3607	4.59011e-12	217	58.3768	64.8851	6.5083	122.449	122.449	7.10543e-12	217	60.6212	63.2258	2.60462	150	146.341	-3.65854	217	57.1689	66.69	9.52117	80	63.8298	-16.1702
218	58.7991	60.7796	1.98051	100	100	0	218	58.026	58.4175	0.39147	120	120	0	218	60.6433	66.8345	6.19124	150	150	0	218	59.2055	62.1073	2.90176	81.0811	78.9474	-2.13371
219	59.3091	65.7655	6.4564	96.7742	96.7742	0	219	57.7623	62.0066	4.24427	117.647	117.647	-6.5512e-12	219	60.4497	66.766	6.31627	146.341	146.341	0	219	59.3369	65.2939	5.95694	81.0811	82.1918	1.1107
220	57.4622	65.604	8.14185	98.3607	100	1.63934	220	57.1401	63.9436	6.80355	115.385	115.385	0	220	61.4039	58.6544	-2.74946	150	150	0	220	58.96	66.5186	7.55862	82.1918	81.0811	-1.1107
221	58.1344	61.129	2.99465	103.448	101.695	-1.75336	221	57.8738	59.1244	1.25057	122.449	122.449	0	221	61.4489	61.7102	0.261312	146.341	146.341	0	221	58.5776	55.1261	-3.45147	80	105.263	25.2632
222	57.2707	62.6465	5.37582	101.695	103.448	1.75336	222	57.5318	61.6846	4.15282	122.449	122.449	0	222	60.8543	65.1119	4.25765	150	150	0	222	59.7547	56.224	-3.53071	76.9231	77.9221	0.999001
223	58.263	62.8767	4.61373	100	98.3607	-1.63934	223	57.2036	62.893	5.68937	117.647	120	2.35294	223	61.0139	63.7312	2.71732	146.341	146.341	0	223	60.106	59.4955	-0.610499	76.9231	78.9474	2.02429
224	59.5738	63.4097	3.83597	101.695	101.695	0	224	58.4569	58.687	0.230072	122.449	120	-2.44898	224	60.9456	64.0505	3.10491	142.857	142.857	0	224	56.9482	65.8656	8.91746	77.9221	103.448	25.5262
225	57.4037	61.6609	4.25719	96.7742	98.3607	1.58646	225	55.4121	59.4821	4.06999	117.647	120	2.35294	225	61.2346	63.8845	2.64992	142.857	146.341	3.48432	225	57.7462	54.3467	-3.39947	77.9221	103.448	25.5262
226	57.1208	61.5387	4.41792	95.2381	95.2381	0	226	56.664	59.5648	2.90078	130.435	130.435	8.07177e-12	226	61.0947	60.5691	-0.525571	142.857	142.857	9.6918e-12	226	58.3396	56.4324	-1.90718	76.9231	77.9221	0.999001
227	55.2967	62.6531	7.35639	103.448	101.695	-1.75336	227	57.8706	60.5536	2.68293	117.647	120	2.35294	227	61.0545	63.1302	2.07571	150	146.341	-3.65854	227	58.6317	58.7924	0.160696	75.9494	75	-0.949367
228	54.8211	55.9793	1.15815	96.7742	98.3607	1.58646	228	57.3475	57.0441	-0.303338	125	125	0	228	61.0018	66.1247	5.12284	146.341	146.341	0	228	59.89	56.444	-3.44601	80	78.9474	-1.05263
229	55.2315	59.0257	3.79423	96.7742	98.3607	1.58646	229	57.0314	59.8862	2.8548	115.385	115.385	0	229	61.3471	60.6446	-0.702518	146.341	150	3.65854	229	59.0761	59.0008	-0.0753071	81.0811	78.9474	-2.13371
230	56.0982	60.5855	4.48731	100	100	0	230	56.6337	60.8647	4.23106	117.647	115.385	-2.26244	230	61.7051	64.116	2.41085	153.846	150	-3.84615	230	57.2156	69.1537	11.9381	82.1918	66.6667	-15.5251
231	54.2489	57.2766	3.02774	100	98.3607	-1.63934	231	57.8428	58.7884	0.945628	117.647	117.647	0	231	61.4621	73.2276	11.7655	153.846	157.895	4.04858	231	54.6373	48.142	-6.49532	81.0811	111.111	30.03
232	58.6044	62.0463	3.44191	100	100	4.74643e-12	232	55.1381	57.1406	2.0025	125	125	-7.40386e-12	232	60.9313	62.748	1.81671	153.846	157.895	4.04858	232	57.4191	64.8071	7.38793	80	63.1579	-16.8421
233	55.8178	61.2452	5.42743	100	100	0	233	55.3035	56.0152	0.711769	117.647	117.647	6.5512e-12	233	60.7736	57.0525	-3.72104	150	150	1.06581e-11	233	54.2162	52.0131	-2.20315	82.1918	111.111	28.9193
234	56.9593	60.8475	3.88819	103.448	103.448	0	234	56.4466	57.0322	0.585643	122.449	122.449	-7.10543e-12	234	60.5125	65.6609	5.14842	142.857	142.857	-9.6918e-12	234	53.1577	62.2565	9.09879	81.0811	64.5161	-16.565
235	55.5812	57.6667	2.08548	101.695	101.695	0	235	55.284	58.2663	2.9823	117.647	117.647	6.5512e-12	235	61.1674	68.5645	7.39706	150	150	0	235	53.7796	49.574	-4.20558	80	109.091	29.0909
236	56.574	62.1686	5.59468	101.695	100	-1.69492	236	52.9936	52.1225	-0.871096	117.647	120	2.35294	236	60.4996	63.4376	2.93802	150	150	0	236	55.4671	50.9596	-4.50752	81.0811	75	-6.08108
237	54.8685	58.0136	3.14506	96.7742	98.3607	1.58646	237	56.667	57.4002	0.733138	125	125	0	237	61.4429	62.8149	1.37206	146.341	146.341	0	237	55.6501	53.7946	-1.85548	78.9474	84.507	5.55967
238	54.605	60.3742	5.76928	103.448	103.448	0	238	55.4529	57.2899	1.83705	125	125	0	238	60.3316	59.0199	-1.31162	146.341	146.341	0	238	55.7823	60.4066	4.62424	83.3333	65.2174	-18.1159
239	53.6237	58.9764	5.35268	100	100	0	239	56.5126	55.8106	-0.70199	130.435	125	-5.43478	239	61.5089	65.4763	3.96737	146.341	146.341	0	239	54.3089	60.2271	5.91819	80	81.0811	1.08108
240	56.0967	56.5011	0.404387	103.448	103.448	0	240	57.0578	57.613	0.555143	120	125	5	240	61.2073	63.128	1.92078	146.341	150	3.65854	240	54.1186	58.2164	4.09778	82.1918	82.1918	0
241	57.3194	62.9137	5.5943	103.448	101.695	-1.75336	241	57.2492	56.605	-0.64423	120	125	5	241	61.1809	63.8472	2.66625	150	146.341	-3.65854	241	53.0092	58.619	5.60976	81.0811	82.1918	1.1107
242	59.0458	75.9037	16.8579	103.448	105.263	1.81488	242	54.6738	59.1843	4.51053	125	122.449	-2.55102	242	61.3461	63.4783	2.13219	150	146.341	-3.65854	242	55.5001	49.82	-5.68004	75	103.448	28.4483
243	55.0104	51.0092	-4.00117	103.448	105.263	1.81488	243	54.3673	56.5388	2.1715	120	122.449	2.44898	243	61.4248	65.0394	3.61454	146.341	150	3.65854	243	53.5108	63.1636	9.65283	83.3333	63.1579	-20.1754
244	53.1217	63.5772	10.4555	107.143	105.263	-1.8797	244	52.7483	53.1668	0.418411	122.449	122.449	0	244	62.0481	63.1865	1.13839	146.341	146.341	0	244	48.9556	55.3845	6.42894	81.0811	82.1918	1.1107
245	51.1713	57.5992	6.42789	103.448	105.263	1.81488	245	53.0611	54.3366	1.27549	120	117.647	-2.35294	245	60.7289	63.7434	3.01449	146.341	146.341	0	245	53.5721	59.4175	5.84549	82.1918	81.0811	-1.1107
246	52.6608	52.9979	0.337076	101.695	101.695	0	246	54.3217	56.5621	2.24036	120	120	0	246	61.3837	57.5728	-3.81084	146.341	146.341	0	246	58.0594	57.8608	-0.198645	78.9474	78.9474	5.91172e-12
247	52.596	57.4933	4.89728	101.695	100	-1.69492	247	53.5603	55.6652	2.1049	130.435	130.435	0	247	60.9653	65.339	4.37367	150	150	0	247	56.9021	64.4657	7.56358	81.0811	81.0811	-6.22435e-12
248	52.9283	57.9944	5.06605	103.448	105.263	1.81488	248	54.013	54.1428	0.1298	120	120	0	248	60.9051	64.3803	3.47522	146.341	146.341	0	248	59.8536	54.4645	-5.38912	75.9494	107.143	31.1935
249	52.4695	55.0378	2.56828	95.2381	95.2381	-4.29168e-12	249	53.9802	54.6504	0.670212	122.449	122.449	-7.10543e-12	249	60.8719	63.7348	2.86284	146.341	142.857	-3.48432	249	58.0875	54.602	-3.48555
250	54.5504	59.3962	4.84575	103.448	101.695	-1.75336	250	52.7518	54.5669	1.81509	122.449	125	2.55102	250	61.1258	60.8248	-0.301026	146.341	150	3.65854	250	57.6058	61.5649	3.95909	76.9231	107.143	30.2198
251	48.1319	55.5064	7.37453	101.695	101.695	0	251	54.4093	54.4692	0.0599412	120	120	0	251	61.2201	62.3053	1.08518	146.341	146.341	0	251	56.7528	54.3848	-2.36798	76.9231	107.143	30.2198
252	50.6666	52.5708	1.90421	98.3607	100	1.63934	252	51.8509	54.884	3.03308	120	117.647	-2.35294	252	61.1224	64.5293	3.40689	150	150	-1.06581e-11	252	58.7849	54.8957	-3.88913	78.9474	77.9221	-1.02529
253	49.625	54.0839	4.45892	95.2381	95.2381	0	253	48.207	49.6584	1.4514	122.449	125	2.55102	253	61.2669	65.3249	4.05805	146.341	146.341	1.01466e-11	253	56.1662	64.8393	8.67307	80	63.8298	-16.1702
254	50.5033	55.1069	4.60363	96.7742	95.2381	-1.5361	254	49.452	50.4584	1.00638	122.449	122.449	0	254	61.1989	62.3598	1.16084	146.341	142.857	-3.48432	254	59.2511	54.0917	-5.15938	78.9474	103.448	24.5009
255	49.4785	53.8063	4.32772	93.75	92.3077	-1.44231	255	52.1448	52.3426	0.197756	125	122.449	-2.55102	255	61.3844	62.781	1.39658	139.535	142.857	3.32226	255	58.1991	66.7303	8.53119	80	63.8298	-16.1702
256	50.8757	55.0013	4.12565	96.7742	98.3607	1.58646	256	49.4828	49.6175	0.134784	115.385	120	4.61538	256	61.4214	65.3255	3.9041	142.857	146.341	3.48432	256	57.0694	54.6987	-2.37071	78.9474	105.263	26.3158
257	50.7427	55.0598	4.31708	100	100	0	257	52.3212	51.7198	-0.601448	113.208	111.111	-2.09644	257	61.609	63.2166	1.60761	146.341	142.857	-3.48432	257	59.2866	54.5356	-4.75102	81.0811	80	-1.08108
258	48.1981	53.1376	4.93951	98.3607	98.3607	-4.59011e-12	258	50.7796	52.6944	1.91479	115.385	115.385	0	258	61.6105	64.8989	3.28843	142.857	142.857	0	258	55.7283	67.0262	11.2979	80	80	0
259	49.4315	52.8357	3.4042	96.7742	96.7742	0	259	51.4403	52.5633	1.12304	113.208	113.208	0	259	60.8973	65.4933	4.59601	153.846	150	-3.84615	259	54.2916	56.138	1.84638	80	80	0
260	49.2677	52.9971	3.72945	92.3077	95.2381	2.9304	260	47.9549	49.8405	1.88559	115.385	117.647	2.26244	260	60.6202	77.0451	16.4249	146.341	150	3.65854	260	54.5163	61.3358	6.81949	80	78.9474	-1.05263
261	48.7119	51.908	3.19611	92.3077	92.3077	0	261	49.0164	50.4739	1.45743	115.385	113.208	-2.17707	261	60.8567	59.6894	-1.16728	146.341	150	3.65854	261	55.6957	52.2766	-3.4191	78.9474	105.263	26.3158
262	47.135	51.7178	4.58286	93.75	93.75	0	262	48.6	50.8061	2.20616	120	120	0	262	59.2275	53.7167	-5.51082	146.341	150	3.65854	262	55.0433	51.8536	-3.18972	77.9221	78.9474	1.02529
263	50.0048	50.5897	0.584929	100	100	4.74643e-12	263	47.9235	50.4808	2.5573	120	117.647	-2.35294	263	59.6449	66.4307	6.78581	146.341	142.857	-3.48432	263	54.9003	53.9587	-0.941578	76.9231	76.9231	-5.61329e-12
264	50.5804	53.2985	2.71813	95.2381	93.75	-1.4881	264	46.0844	46.9894	0.905068	120	125	5	264	60.0826	65.246	5.16349	150	150	-1.06581e-11	264	56.8738	52.9064	-3.96739	78.9474	78.9474	0
265	53.2365	58.0516	4.81518	98.3607	98.3607	0	265	47.8364	49.5811	1.74465	117.647	115.385	-2.26244	265	61.1232	64.8628	3.73954	146.341	146.341	0	265	58.3792	56.2472	-2.13207	77.9221	75.9494	-1.97271
266	54.2344	60.2037	5.96928	101.695	101.695	0	266	44.1504	45.0678	0.917384	122.449	122.449	7.10543e-12	266	60.7031	64.0732	3.37016	142.857	142.857	0	266	58.2384	56.5306	-1.70783	78.9474	80	1.05263
267	49.6495	54.9211	5.27155	103.448	103.448	0	267	50.0768	50.0617	-0.0151012	127.66	125	-2.65957	267	61.5611	62.4126	0.851459	142.857	139.535	-3.32226	267	56.1326	54.9909	-1.1417	78.9474	75.9494	-2.998
268	49.5445	53.4375	3.89302	100	100	0	268	50.1758	47.7212	-2.45462	125	125	7.40386e-12	268	59.9503	65.4688	5.51847	139.535	142.857	3.32226	268	57.507	53.7488	-3.75822	78.9474	82.1918	3.24441
269	47.6289	52.7805	5.15159	98.3607	100	1.63934	269	46.8491	49.7425	2.89338	125	125	7.40386e-12	269	61.1808	64.7557	3.57492	146.341	146.341	0	269	57.9152	65.0781	7.16293	81.0811	65.2174	-15.8637
270	48.7644	52.2021	3.43774	101.695	100	-1.69492	270	48.2328	49.939	1.70621	127.66	127.66	0	270	60.5385	64.2921	3.75368	142.857	142.857	9.6918e-12	270	59.6824	54.25	-5.43237	78.9474	105.263	26.3158
271	54.5321	66.2184	11.6863	105.263	105.263	-5.24381e-12	271	47.446	48.2498	0.803777	122.449	122.449	-7.10543e-12	271	61.2848	64.163	2.87812	139.535	139.535	-9.23706e-12	271	60.8949	59.4963	-1.39863	77.9221	76.9231	-0.999001
272	52.5457	51.5478	-0.997944	105.263	105.263	-5.24381e-12	272	45.7182	47.2657	1.54752	127.66	127.66	0	272	60.1961	64.8093	4.61318	142.857	146.341	3.48432	272	58.2917	69.2	10.9083
273	51.3398	59.2135	7.87363	98.3607	100	1.63934	273	46.2518	46.5839	0.332139	120	122.449	2.44898	273	60.7254	61.9826	1.25721	142.857	142.857	-9.6918e-12	273	56.1684	69.6277	13.4593	80	125	45
274	50.7186	54.6739	3.95533	101.695	101.695	0	274	45.9765	47.6633	1.6868	117.647	115.385	-2.26244	274	61.0357	64.0563	3.02064	150	146.341	-3.65854	274	55.9607	58.345	2.38427	80	125	45
275	50.038	55.0308	4.9928	98.3607	98.3607	0	275	51.1422	54.5911	3.44891	115.385	115.385	-6.30962e-12	275	60.5652	65.4016	4.8364	142.857	142.857	9.6918e-12	275	58.2027	84.5399	26.3372	86.9565	62.5	-24.4565
276	50.8037	55.4519	4.64824	98.3607	98.3607	0	276	50.0126	52.566	2.55337	120	122.449	2.44898	276	60.4662	59.3961	-1.07011	142.857	142.857	-9.6918e-12	276	58.0431	63.8655	5.82237	85.7143	125	39.2857
277	44.8853	50.5752	5.68988	96.7742	98.3607	1.58646	277	49.229	52.9686	3.73958	115.385	115.385	0	277	61.5994	63.1432	1.54384	139.535	139.535	9.23706e-12	277	56.7339	54.5333	-2.20053	81.0811	89.5522	8.47116
278	51.6427	55.2235	3.5808	101.695	100	-1.69492	278	47.8442	50.648	2.80375	122.449	122.449	0	278	61.121	65.7702	4.64924	142.857	146.341	3.48432	278	56.1763	55.0906	-1.08573	81.0811	89.5522	8.47116
279	52.468	58.6763	6.20832	101.695	101.695	4.88853e-12	279	49.2017	50.6073	1.40566	115.385	115.385	0	279	61.357	63.7878	2.43082	146.341	142.857	-3.48432	279	55.4967	64.6336	9.13699
280	50.0042	54.9342	4.93	103.448	103.448	0	280	49.4461	51.5181	2.07199	115.385	115.385	0	280	61.0108	62.9692	1.9584	142.857	142.857	9.6918e-12	280	58.3755	52.3836	-5.99192
281	49.7772	56.6153	6.83817	100	100	0	281	47.4272	50.2936	2.86638	120	122.449	2.44898	281	60.7042	63.2095	2.50531	136.364	139.535	3.17125	281	58.3714	58.8622	0.490812
282	47.8965	52.2987	4.40225	96.7742	96.7742	0	282	45.811	49.1727	3.36165	120	120	0	282	59.7453	59.9562	0.210959	142.857	139.535	-3.32226	282	57.7517	55.7027	-2.04898	82.1918	78.9474	-3.24441
283	49.9518	53.8386	3.88683	96.7742	95.2381	-1.5361	283	49.2967	50.2881	0.991436	113.208	111.111	-2.09644	283	60.6595	61.8252	1.16579	142.857	142.857	9.6918e-12	283	59.0119	65.3986	6.38671	82.1918	78.9474	-3.24441
284	47.7983	55.5522	7.7539	96.7742	98.3607	1.58646	284	45.6397	49.4816	3.84191	122.449	122.449	0	284	60.6902	61.0415	0.351347	150	150	0	284	58.8738	71.5503	12.6765	83.3333	63.1579	-20.1754
285	51.0916	53.691	2.59937	103.448	101.695	-1.75336	285	43.7459	47.0938	3.34798	120	120	0	285	60.801	66.0287	5.22767	139.535	139.535	-9.23706e-12	285	59.5163	62.6491	3.13285	80	115.385	35.3846
286	49.7998	55.4856	5.68581	96.7742	98.3607	1.58646	286	42.8712	45.3595	2.48829	125	125	0	286	58.9612	63.1365	4.17527	146.341	146.341	0	286	58.5754	62.0819	3.50654	77.9221	78.9474	1.02529
287	50.7271	55.5698	4.84271	96.7742	96.7742	0	287	42.3911	45.5247	3.13361	117.647	120	2.35294	287	60.6009	59.4991	-1.10184	150	150	0	287	56.2307	54.6854	-1.54537	81.0811	84.507	3.42596
288	49.2192	54.0683	4.8491	98.3607	100	1.63934	288	41.2437	43.826	2.58227	122.449	120	-2.44898	288	60.1956	72.9755	12.7799	146.341	142.857	-3.48432	288	58.2442	55.5473	-2.69687	80	76.9231	-3.07692
289	49.8874	55.8771	5.98963	98.3607	98.3607	0	289	42.266	42.9353	0.669318	120	120	0	289	60.727	62.4653	1.73834	146.341	142.857	-3.48432	289	58.0546	63.3434	5.28876	78.9474	81.0811	2.13371
290	46.3108	50.6182	4.30741	95.2381	95.2381	0	290	44.0291	45.7784	1.74925	113.208	113.208	0	290	60.322	56.9331	-3.38894	146.341	150	3.65854	290	57.4825	63.9825	6.50002	75.9494	74.0741	-1.87529
291	45.4032	50.3852	4.98197	98.3607	98.3607	4.59011e-12	291	41.6503	46.4314	4.78115	120	120	0	291	59.3995	64.7213	5.3218	150	150	0	291	58.6416	62.1997	3.55816	84.507	81.0811	-3.42596
292	47.0297	50.5805	3.5508	101.695	101.695	-4.88853e-12	292	47.2156	48.3663	1.1507	120	117.647	-2.35294	292	60.1209	62.7436	2.62276	150	150	0	292	55.9343	62.3672	6.43286	77.9221	80	2.07792
293	46.7654	50.5236	3.75817	95.2381	95.2381	4.29168e-12	293	44.1606	48.6078	4.44719	122.449	125	2.55102	293	59.1563	62.5122	3.35581	150	150	0	293	54.8104	80.1902	25.3798	77.9221	80	2.07792
294	45.9177	50.8622	4.94445	95.2381	96.7742	1.5361	294	43.0194	44.9955	1.97606	120	120	0	294	59.8513	60.3326	0.481345	146.341	146.341	0	294	55.7099	63.785	8.0751	83.3333	84.507	1.17371
295	48.2602	53.2699	5.00964	103.448	100	-3.44828	295	45.8646	48.6857	2.82111	122.449	122.449	0	295	59.1048	61.5362	2.43144	146.341	146.341	0	295	58.3719	63.2516	4.87963	85.7143	83.3333	-2.38095
296	47.07	50.5522	3.48219	96.7742	98.3607	1.58646	296	57.9506	68.3061	10.3555	127.66	130.435	2.77521	296	58.8797	61.1167	2.23694	142.857	146.341	3.48432	296	57.4212	79.8868	22.4656	78.9474	86.9565	8.00915
297	50.5798	54.2271	3.64736	101.695	100	-1.69492	297	56.6143	57.6396	1.02536	127.66	130.435	2.77521	297	58.9408	59.9936	1.05287	146.341	142.857	-3.48432	297	57.759	74.7259	16.9669	78.9474	69.7674	-9.17993
298	52.6882	56.792	4.10378	101.695	101.695	0	298	57.1008	57.0829	-0.0179739	125	125	-7.40386e-12	298	60.6279	64.0004	3.37251	146.341	146.341	0	298	57.6702	55.3474	-2.32277	82.1918	75	-7.19178
299	48.7288	54.9072	6.17837	109.091	109.091	0	299	57.6329	64.1187	6.48577	122.449	122.449	7.10543e-12	299	60.3047	62.2808	1.97618	139.535	139.535	0	299	56.8974	54.0445	-2.85291	82.1918	75	-7.19178
300	61.1253	65.0841	3.95884	105.263	107.143	1.8797	300	56.1695	58.891	2.72153	130.435	130.435	0	300	57.6886	56.9052	-0.783411	139.535	142.857	3.32226	300	58.9714	58.0119	-0.959473	78.9474	84.507	5.55967
301	60.7509	64.9642	4.21326	105.263	107.143	1.8797	301	56.717	56.0791	-0.637881	120	120	0	301	58.9417	57.2348	-1.70689	142.857	142.857	9.6918e-12	301	60.1833	57.6541	-2.52918	78.9474	81.0811	2.13371
302	60.3864	66.5875	6.20114	103.448	103.448	5.07328e-12	302	56.7042	59.3184	2.61416	120	117.647	-2.35294	302	58.4246	65.2173	6.79265	146.341	142.857	-3.48432	302	58.5354	65.1133	6.57783	80	77.9221	-2.07792
303	60.2588	75.8534	15.5945	105.263	107.143	1.8797	303	57.098	59.4922	2.39425	120	122.449	2.44898	303	59.3181	60.7918	1.47373	146.341	150	3.65854	303	59.0935	57.682	-1.41154	81.0811	78.9474	-2.13371
304	57.6638	43.987	-13.6768	96.7742	122.449	25.6748	304	56.433	57.6105	1.1775	122.449	122.449	-7.10543e-12	304	60.1509	60.4554	0.304548	150	146.341	-3.65854	304	58.781	60.1255	1.34444	78.9474	83.3333	4.38596
305	58.9851	70.777	11.7919	101.695	82.1918	-19.5031	305	56.4715	58.3346	1.8631	127.66	127.66	0	305	59.9148	60.2974	0.382604	146.341	146.341	-1.01466e-11	305	59.6413	59.9941	0.352796	81.0811	75.9494	-5.13171
306	59.1507	66.5621	7.41135	100	100	0	306	57.0866	58.156	1.06942	115.385	117.647	2.26244	306	59.9217	62.9963	3.0746	142.857	142.857	0	306	57.9625	60.5535	2.59107	81.0811	78.9474	-2.13371
307	59.5417	60.077	0.535293	98.3607	100	1.63934	307	55.8702	59.9394	4.06916	125	122.449	-2.55102	307	60.373	63.0583	2.68527	142.857	142.857	9.6918e-12	307	58.5858	55.3381	-3.24771	80	84.507	4.50704
308	58.5878	67.8165	9.22873	96.7742	96.7742	4.43379e-12	308	55.9337	57.6692	1.73551	117.647	117.647	6.5512e-12	308	58.6998	60.5167	1.81688	142.857	142.857	-9.6918e-12	308	57.1746	60.4172	3.24259	77.9221	78.9474	1.02529
309	59.3482	64.1221	4.77392	109.091	109.091	0	309	54.4924	55.952	1.45954	122.449	120	-2.44898	309	59.5994	60.739	1.1396	142.857	146.341	3.48432	309	59.1459	56.2567	-2.88926	76.9231	77.9221	0.999001
310	59.595	62.2736	2.6786	98.3607	98.3607	-4.59011e-12	310	54.8155	57.1233	2.30779	120	122.449	2.44898	310	59.7947	61.6978	1.90306	139.535	136.364	-3.17125	310	58.3241	60.9953	2.67124	78.9474	76.9231	-2.02429
311	56.796	70.5491	13.7531	103.448	105.263	1.81488	311	54.8522	56.428	1.5758	120	120	0	311	59.2951	60.7843	1.48923	142.857	146.341	3.48432	311	59.9596	56.7326	-3.227	80	80	0
312	58.0787	59.5825	1.50374	111.111	109.091	-2.0202	312	53.1856	55.9686	2.78306	122.449	122.449	7.10543e-12	312	58.9041	61.1151	2.21102	142.857	139.535	-3.32226	312	57.3844	66.4178	9.03337	76.9231	78.9474	2.02429
313	59.1523	64.0041	4.85183	105.263	105.263	0	313	54.5519	55.2449	0.692936	117.647	120	2.35294	313	59.8324	62.6381	2.80574	136.364	139.535	3.17125	313	59.6654	70.538	10.8726	83.3333	61.2245	-22.1088
314	58.2849	66.7347	8.44983	111.111	111.111	0	314	50.3326	53.6631	3.33049	122.449	120	-2.44898	314	60.0212	61.574	1.55282	142.857	139.535	-3.32226	314	58.0452	64.2262	6.18107	77.9221	120	42.0779
315	57.734	59.1824	1.44841	107.143	109.091	1.94805	315	54.6759	55.5268	0.850942	115.385	115.385	0	315	60.326	63.4837	3.15772	142.857	142.857	0	315	59.0183	56.5298	-2.48855	80	76.9231	-3.07692
316	59.4042	64.1464	4.74214	103.448	100	-3.44828	316	53.2456	57.9745	4.7289	120	120	0	316	59.6248	62.6085	2.98374	150	150	0	316	59.6227	53.4004	-6.22233	81.0811	78.9474	-2.13371
317	60.0132	69.2116	9.19839	105.263	107.143	1.8797	317	55.28	54.9649	-0.315093	122.449	122.449	-7.10543e-12	317	59.2713	73.447	14.1757	153.846	157.895	4.04858	317	59.6285	84.9422	25.3136	81.0811	78.9474	-2.13371
318	59.766	61.3226	1.55663	103.448	103.448	0	318	57.1703	59.8781	2.70781	122.449	122.449	7.10543e-12	318	61.0658	60.1067	-0.959105	153.846	157.895	4.04858	318	58.4572	53.8386	-4.6186	80	89.5522	9.55224
319	59.8311	68.3864	8.55528	105.263	105.263	0	319	53.4253	57.1357	3.71042	125	125	-7.40386e-12	319	59.4761	59.584	0.107948	146.341	146.341	0	319	59.5988	66.6616	7.06283	82.1918	75.9494	-6.24241
320	59.8713	63.464	3.5927	105.263	105.263	0	320	53.2116	53.5504	0.338714	122.449	122.449	7.10543e-12	320	59.8369	61.773	1.93619	150	150	0	320	59.5038	62.6263	3.12242	82.1918	84.507	2.31526
321	59.2433	63.8413	4.59795	98.3607	100	1.63934	321	53.9962	55.8495	1.85334	125	125	-7.40386e-12	321	57.8662	62.0874	4.22124	150	150	1.06581e-11	321	58.4677	64.6917	6.22402	77.9221	80	2.07792
322	58.7197	72.0078	13.2882	101.695	100	-1.69492	322	56.5661	57.3638	0.797693	122.449	122.449	7.10543e-12	322	59.0443	59.7937	0.749438	150	150	0	322	58.5833	59.3925	0.809164	76.9231	77.9221	0.999001
323	59.6876	60.8444	1.15682	100	101.695	1.69492	323	52.6512	55.3774	2.72622	127.66	127.66	0	323	57.6997	58.5892	0.889409	142.857	146.341	3.48432	323	59.1559	59.0071	-0.148836	81.0811	80	-1.08108
324	60.5107	76.8943	16.3835	103.448	100	-3.44828	324	54.35	54.646	0.296046	125	125	-7.40386e-12	324	58.5853	58.1449	-0.440382	146.341	142.857	-3.48432	324	58.3659	59.6166	1.25067	81.0811	76.9231	-4.158
325	59.6031	65.0128	5.40974	103.448	107.143	3.69458	325	56.6557	66.8408	10.185	130.435	127.66	-2.77521	325	57.9159	62.0909	4.17496	139.535	142.857	3.32226	325	59.4089	59.9731	0.564199	78.9474	84.507	5.55967
326	60.567	67.1387	6.57176	98.3607	96.7742	-1.58646	326	56.6147	54.9224	-1.69236	130.435	127.66	-2.77521	326	57.7114	59.9401	2.22865	142.857	142.857	-9.6918e-12	326	60.1329	61.7567	1.62384	77.9221	75.9494	-1.97271
327	60.8281	73.363	12.5349	96.7742	95.2381	-1.5361	327	55.438	55.9442	0.506148	130.435	133.333	2.89855	327	58.646	59.9786	1.33255	142.857	142.857	9.6918e-12	327	60.2841	64.9267	4.64253	77.9221	76.9231	-0.999001
328	61.1059	62.4632	1.35737	105.263	105.263	-1.05018e-11	328	54.2034	60.3607	6.15725	127.66	127.66	0	328	57.7451	59.7099	1.96479	139.535	136.364	-3.17125	328	59.9275	58.2853	-1.64216	76.9231	78.9474	2.02429
329	59.0834	61.9372	2.85377	105.263	105.263	-1.05018e-11	329	55.4343	56.9374	1.50306	130.435	127.66	-2.77521	329	59.6373	60.9731	1.33586	142.857	142.857	0	329	59.289	63.875	4.58601	78.9474	78.9474	0
330	60.2295	72.6173	12.3879	101.695	101.695	9.79128e-12	330	55.8742	55.9914	0.117185	122.449	125	2.55102	330	58.7835	59.2269	0.443428	142.857	142.857	0	330	60.0158	55.4292	-4.58658	81.0811	72.2892	-8.79192
331	59.4481	76.2029	16.7548	105.263	103.448	-1.81488	331	52.3293	57.6525	5.3232	120	120	0	331	59.8418	63.3163	3.47441	142.857	142.857	0	331	58.4443	65.7335	7.28919	82.1918	88.2353	6.04351
332	58.9983	49.1624	-9.83591	103.448	107.143	3.69458	332	49.8792	52.8279	2.94864	120	120	0	332	58.4709	60.9345	2.46363	139.535	142.857	3.32226	332	60.2114	52.2094	-8.00198	76.9231	78.9474	2.02429
333	59.4916	73.8219	14.3303	101.695	100	-1.69492	333	52.184	52.8752	0.691219	120	120	0	333	59.4267	60.6155	1.18876	139.535	136.364	-3.17125	333	58.7219	65.3479	6.62601	82.1918	78.9474	-3.24441
334	60.1277	71.9962	11.8684	98.3607	100	1.63934	334	48.1126	54.6735	6.56091	125	125	0	334	57.6133	63.1378	5.52445	139.535	139.535	0	334	58.5735	52.663	-5.91059	80	82.1918	2.19178
335	58.4983	65.9898	7.49147	98.3607	98.3607	0	335	48.8997	48.1224	-0.777321	122.449	122.449	0	335	59.7337	59.7443	0.0106425	142.857	146.341	3.48432	335	58.8712	63.8962	5.025	80	78.9474	-1.05263
336	58.4414	56.7985	-1.64288	96.7742	98.3607	1.58646	336	50.6753	53.6386	2.96334	117.647	117.647	0	336	58.7879	62.3308	3.54289	142.857	139.535	-3.32226	336	58.4853	54.3448	-4.14055	76.9231	81.0811	4.158
337	59.3526	74.8316	15.479	105.263	101.695	-3.56824	337	55.9004	58.226	2.32557	120	120	0	337	60.3863	61.6408	1.25443	136.364	139.535	3.17125	337	58.6632	60.8116	2.14844	76.9231	77.9221	0.999001
338	58.7204	65.0003	6.27993	100	103.448	3.44828	338	50.8916	58.2193	7.32765	120	122.449	2.44898	338	58.0787	60.1977	2.11901	142.857	139.535	-3.32226	338	58.6622	57.1297	-1.53241	77.9221	78.9474	1.02529
339	57.7504	65.2102	7.45972	100	98.3607	-1.63934	339	53.9511	55.0137	1.06262	122.449	120	-2.44898	339	59.1739	59.9196	0.745746	139.535	142.857	3.32226	339	58.4588	56.4578	-2.00098	80	73.1707	-6.82927
340	59.0199	58.2476	-0.772258	100	100	0	340	54.3004	58.8549	4.5545	125	125	-7.40386e-12	340	58.1463	61.9423	3.79598	139.535	139.535	9.23706e-12	340	59.9721	56.2081	-3.76405	81.0811	81.0811	0
341	59.0153	71.8188	12.8035	101.695	101.695	-9.79128e-12	341	55.3048	58.9399	3.63506	120	120	0	341	57.1129	58.4791	1.36621	139.535	139.535	0	341	58.4499	56.2096	-2.24038	76.9231	85.7143	8.79121
342	59.7273	67.3463	7.61899	100	100	9.47864e-12	342	52.0549	54.7583	2.70338	122.449	125	2.55102	342	58.055	58.8891	0.834094	142.857	142.857	-9.6918e-12	342	59.1632	64.1029	4.93965	76.9231	76.9231	5.61329e-12
343	59.4619	60.3347	0.87281	98.3607	100	1.63934	343	53.245	56.9049	3.65992	117.647	117.647	0	343	57.5925	60.4227	2.8302	139.535	136.364	-3.17125	343	58.9884	61.2583	2.26987	82.1918	74.0741	-8.11771
344	59.5181	78.3421	18.8241	98.3607	96.7742	-1.58646	344	49.9469	53.4133	3.46642	125	122.449	-2.55102	344	58.7155	60.0868	1.37132	139.535	142.857	3.32226	344	57.8587	53.2082	-4.65044	88.2353	70.5882	-17.6471
345	58.1992	57.9072	-0.292027	98.3607	101.695	3.33426	345	45.3136	49.8255	4.51191	125	125	7.40386e-12	345	60.2493	61.1311	0.881838	146.341	142.857	-3.48432	345	59.0914	80.6642	21.5728	88.2353	70.5882	-17.6471
346	57.9234	59.7409	1.8175	98.3607	95.2381	-3.12256	346	50.8718	50.8076	-0.0642464	122.449	122.449	0	346	62.0983	60.6038	-1.49447	142.857	142.857	9.6918e-12	346	59.2004	57.7872	-1.41319	84.507	122.449	37.9419
347	59.614	74.945	15.331	103.448	101.695	-1.75336	347	49.5136	54.9447	5.43101	120	120	0	347	58.8732	62.4122	3.53898	142.857	142.857	9.6918e-12	347	58.1146	68.0822	9.96764	85.7143	81.0811	-4.6332
348	59.7264	60.5615	0.835125	100	103.448	3.44828	348	49.0894	51.3897	2.30026	120	120	0	348	59.5722	59.6036	0.0313443	146.341	146.341	0	348	58.9687	59.9763	1.00767	84.507	85.7143	1.20724
349	59.1264	71.9918	12.8655	100	98.3607	-1.63934	349	51.2482	52.8636	1.61541	120	122.449	2.44898	349	59.8116	64.9323	5.12071	146.341	142.857	-3.48432	349	58.9059	65.504	6.59813	82.1918	84.507	2.31526
350	57.8598	60.8846	3.02479	100	100	0	350	49.6692	56.3343	6.66504	122.449	120	-2.44898	350	58.1873	60.1732	1.98582	142.857	142.857	9.6918e-12	350	58.6696	69.6579	10.9882	84.507	65.2174	-19.2897
351	59.2911	65.9775	6.68645	103.448	101.695	-1.75336	351	49.8675	52.2636	2.39611	120	120	0	351	57.7476	56.9972	-0.750414	146.341	150	3.65854	351	60.4622	64.2816	3.81944	83.3333	83.3333	6.57963e-12
352	59.466	66.5927	7.12673	101.695	103.448	1.75336	352	48.0393	53.483	5.44367	125	125	7.40386e-12	352	59.4798	58.7242	-0.755591	146.341	142.857	-3.48432	352	56.9329	58.2064	1.27351	86.9565	120	33.0435
353	59.1272	65.9382	6.81095	103.448	103.448	0	353	52.5168	53.7741	1.25729	125	125	0	353	59.2781	64.8237	5.54554	142.857	142.857	0	353	60.4919	65.6044	5.11252	86.9565	68.1818	-18.7747
354	59.7585	61.6526	1.89402	100	100	0	354	52.3373	61.3971	9.05985	122.449	122.449	0	354	58.7943	58.6378	-0.156431	139.535	142.857	3.32226	354	58.7913	59.2073	0.41598	78.9474	117.647	38.6997
355	60.8413	80.1373	19.296	96.7742	95.2381	-1.5361	355	55.4752	56.196	0.72078	122.449	122.449	0	355	56.1324	57.8472	1.7148	136.364	136.364	-8.78231e-12	355	59.1379	59.9139	0.775962	82.1918	77.9221	-4.2697
356	59.2975	49.791	-9.50656	103.448	101.695	-1.75336	356	55.8658	60.0845	4.21871	130.435	130.435	-8.07177e-12	356	54.6138	55.842	1.22814	139.535	139.535	9.23706e-12	356	57.569	58.3133	0.744335	82.1918	80	-2.19178
357	60.4311	77.7777	17.3466	103.448	101.695	-1.75336	357	56.3994	60.6487	4.24933	125	125	7.40386e-12	357	56.0501	55.9677	-0.0823857	139.535	139.535	0	357	57.6681	53.0808	-4.58721	81.0811	82.1918	1.1107
[truncated: 730 more rows]

## Sheet: Couple 4
CC Number	Depth GS	Depth Est	Depth error	Rate GS	Rate Est	Rate error	CC Number	Depth GS	Depth Est	Depth error	Rate GS	Rate Est	Rate error	CC Number	Depth GS	Depth Est	Depth error	Rate GS	Rate Est	Rate error	CC Number	Depth GS	Depth Est	Depth error	Rate GS	Rate Est	Rate error
[truncated: 927 more rows]

[truncated: 11 more sheets: Couple 5, Couple 6, Couple 7, Couple 8, Couple 9, Couple 10, Couple 11, Couple 12, Couple 13, Couple 14, Legends]
